# Supplementary material
Source: publisher site journal article supplement (https://www.spandidos-publications.com/4015/downloadSupplementary)
Supplement: Supplementary file 1 [file downloadSupplementary]

## Sheet: Table SI
Table SI. Microarray normalized data using Illumina Human HT-12 v4 BeadChips.
ID_REF	Gene	5A_ICD#1	5A_ICD#2	5A_ICD#3	5A_ECD#1	5A_ECD#2	5A_ECD#3	5A_Full#1	5A_Full#2	5A_Full#3	Empty#1	Empty#2	Empty#3	log2FC (5A_ICD vs. Empty)	P-value (5A_ICD vs. Empty)	log2FC (5A_ECD vs. Empty)	P-value (5A_ECD vs. Empty)	log2FC (5A_Full vs. Empty)	P-value (5A_Full vs. Empty)
ILMN_1343291	EEF1A1	13.9547	14.0049	13.9128	13.9547	13.9742	13.9192	13.9881	13.8179	13.9547	13.8727	13.9443	13.8487	0.0689074	0.153214	0.0608247	0.138226	0.0317116	0.622043
ILMN_1343295	GAPDH	12.9228	12.9968	12.9292	12.9725	12.9725	12.9342	12.807	12.894	12.9484	12.865	12.8472	12.8532	0.0944723	0.017559	0.104644	0.00162299	0.0280024	0.537062
ILMN_1651199	LOC643334	6.61534	6.64061	6.62414	6.53802	6.72015	6.62255	6.60562	6.59708	6.56278	6.55436	6.60389	6.66474	0.0190323	0.592521	0.0192461	0.770123	-0.0191738	0.607997
ILMN_1651209	SLC35E2	6.64098	6.56709	6.66273	6.64794	6.6569	6.62011	6.63892	6.58536	6.70883	6.6029	6.59659	6.59857	0.0242479	0.45017	0.0422994	0.0196754	0.0450192	0.27693
ILMN_1651210	DUSP22	6.66994	6.48479	6.52359	6.49296	6.59323	6.67159	6.62462	6.48184	6.52529	6.56849	6.56849	6.53925	0.000698296	0.990846	0.027183	0.632598	-0.0148273	0.749633
ILMN_1651221	LOC642820	6.5615	6.60327	6.75071	6.74467	6.7048	6.75516	6.64326	6.65809	6.72788	6.6538	6.73648	6.69718	-0.0573262	0.408568	0.0390577	0.240767	-0.0194094	0.61232
ILMN_1651228	RPS28	13.0198	13.1183	12.894	13.063	13.2291	13.0075	13.1944	13.177	13.2387	13.2036	13.2327	13.1991	-0.201117	0.0377316	-0.111932	0.172163	-0.00845062	0.710261
ILMN_1651229	IPO13	7.89973	7.84884	7.87925	7.47918	7.75046	7.71068	7.77229	7.90254	7.70775	7.62922	7.66028	7.72269	0.205211	0.00276803	-0.0239575	0.800957	0.123469	0.12392
ILMN_1651230	TESSP1	6.6029	6.7063	6.60463	6.66994	6.65117	6.58811	6.57657	6.60593	6.73535	6.58197	6.52998	6.56696	0.0783057	0.105118	0.0767705	0.058096	0.0796435	0.194534
ILMN_1651232	LOC653113	6.72471	6.91706	6.71193	6.68076	6.88992	6.77904	6.83947	6.7149	6.89189	6.8298	6.70762	6.9027	-0.0288095	0.758258	-0.0301353	0.734921	0.00204422	0.980199
ILMN_1651235	AFAP1	6.6382	6.64938	6.79562	6.68485	6.69707	6.59248	6.59211	6.67018	6.67407	6.62341	6.65356	6.63191	0.0581085	0.322294	0.0218396	0.557977	0.00915658	0.761391
ILMN_1651236	GGTLC1	6.68917	6.64206	6.68205	6.72981	6.58335	6.61276	6.58311	6.49722	6.69185	6.64398	6.60389	6.61104	0.0514541	0.05497	0.0223378	0.65539	-0.0289118	0.642352
ILMN_1651237	CDT1	9.10062	9.35054	9.08574	9.24486	8.90924	9.06747	9.25951	8.97915	9.30338	9.09179	9.11443	9.37566	-0.014993	0.910449	-0.120107	0.41761	-0.0132832	0.927117
ILMN_1651238	TRPV1	6.58147	6.58949	6.62864	6.55014	6.46887	6.66852	6.58761	6.67395	6.69457	6.60883	6.6594	6.57443	-0.0143537	0.642771	-0.0517095	0.457863	0.0378262	0.408595
ILMN_1651249	LOC652879	6.58035	6.66285	6.72004	6.66285	6.59621	6.64206	6.6465	6.67959	6.71027	6.60439	6.57013	6.60179	0.062309	0.212209	0.0416031	0.13887	0.0866857	0.0155946
ILMN_1651253	LOC644150	6.62828	6.48332	6.60772	6.53505	6.62608	6.64902	6.62462	6.61214	6.55193	6.55296	6.5509	6.60956	0.00196437	0.970061	0.0322455	0.462845	0.0250921	0.443622
ILMN_1651254	LPP	9.12289	8.99664	9.04709	9.1236	9.24802	9.10895	8.98363	9.00996	8.73983	9.05233	9.00584	9.01756	0.0302958	0.483314	0.134948	0.0434037	-0.114101	0.260449
ILMN_1651259	FLJ36848	6.74937	6.70192	6.63572	6.80874	6.58335	6.6671	6.62462	6.76426	6.76735	6.67337	6.78716	6.60808	0.00613221	0.925777	-0.00314037	0.971986	0.0292059	0.699451
ILMN_1651260	CCNE2	6.63675	6.58649	6.565	6.63191	6.54216	6.57291	6.60993	6.59198	6.56557	6.59111	6.6594	6.6157	-0.0259906	0.423264	-0.0397422	0.295479	-0.0329104	0.23834
ILMN_1651262	HNRNPAB	12.3441	12.3783	12.4073	12.3818	12.4367	12.431	12.3037	12.2791	12.439	12.2043	12.2266	12.2224	0.158805	0.00123337	0.198738	0.000446121	0.122805	0.0706627
ILMN_1651268	LOH12CR1	7.0039	6.89305	6.95505	6.91776	6.9087	6.89959	6.8522	6.94361	6.96294	6.84177	6.93196	6.83022	0.0826811	0.142818	0.0407011	0.27975	0.0515983	0.333121
ILMN_1651278	SNIP1	8.14439	8.16292	8.01347	8.28934	8.13118	8.2535	7.94884	7.92784	8.02723	7.9766	7.98276	7.83117	0.17675	0.0608401	0.294494	0.012902	0.0377928	0.550467
ILMN_1651279	LOC645349	6.81941	6.83758	6.87159	6.80992	6.80295	6.80424	6.86176	6.93166	6.82016	6.796	6.84292	6.83915	0.0168387	0.476501	-0.0203213	0.252327	0.0451738	0.276092
ILMN_1651281	LOC389669	6.54255	6.45927	6.54151	6.59385	6.53323	6.53751	6.58147	6.62499	6.59844	6.59993	6.5446	6.58911	-0.0634413	0.121566	-0.0230192	0.42349	0.0237537	0.324095
ILMN_1651282	COL17A1	7.98172	7.99796	7.76966	7.90708	7.78852	7.984	7.97748	7.76072	7.97371	7.86206	7.89815	8.09288	-0.0345867	0.753218	-0.0578335	0.561656	-0.0470621	0.666521
ILMN_1651285	BCL6B	6.8683	6.92695	6.88749	7.01297	6.95631	6.89143	6.80928	7.18594	6.903	6.9069	6.7757	7.0523	-0.0173853	0.841942	0.0419356	0.655909	0.0544422	0.714422
ILMN_1651286	GRHL1	6.74764	6.69509	6.71055	6.80874	6.67413	6.64771	6.8263	6.69126	6.70883	6.76503	6.72981	6.77778	-0.0397789	0.133673	-0.04735	0.413078	-0.0154094	0.747943
ILMN_1651288	LOC339760	6.69625	6.67923	6.65833	6.6465	6.75794	6.76658	6.68789	6.65117	6.68462	6.63191	6.62875	6.60808	0.0550211	0.0143035	0.100757	0.062739	0.0516431	0.0206014
ILMN_1651292	LOC644613	6.68917	6.58348	6.58185	6.54583	6.47503	6.61141	6.60104	6.61067	6.63578	6.6029	6.59659	6.63191	0.00770038	0.845846	-0.0663786	0.179534	0.00536445	0.738986
ILMN_1651296	LOC143666	7.71417	7.57799	7.64177	7.59862	7.56128	7.54347	7.74527	7.66836	7.84534	7.79458	7.74066	7.65512	-0.0854769	0.205079	-0.16233	0.020623	0.0228704	0.744105
ILMN_1651303	ATP13A4	6.66285	6.68345	6.67242	6.70411	6.7048	6.72209	6.63046	6.59708	6.6029	6.66888	6.5982	6.55704	0.0648644	0.122392	0.102295	0.0368316	0.0021045	0.953941
ILMN_1651309	DIAPH2	6.51508	6.61815	6.62255	6.61558	6.62231	6.55256	6.58911	6.62912	6.6256	6.61153	6.59968	6.57443	-0.00995253	0.800086	0.00160613	0.951394	0.0193982	0.313296
ILMN_1651310	MLLT4	6.58448	6.62267	6.62414	6.5982	6.66746	6.57291	6.59919	6.58536	6.64458	6.6538	6.59061	6.671	-0.028041	0.368248	-0.0256147	0.530663	-0.0287626	0.396055
ILMN_1651315	HMG20B	9.25118	9.47473	9.37699	9.43507	9.28661	9.3241	9.33127	9.20977	9.40482	9.31311	9.42003	9.33424	0.0118399	0.878187	-0.00720295	0.902615	-0.040508	0.570315
ILMN_1651316	CD69	6.7757	6.69903	6.67806	6.79237	6.61815	6.68858	6.68649	6.66379	6.61913	6.67207	6.67242	6.6157	0.0641995	0.141844	0.0463043	0.439476	0.00307337	0.915867
ILMN_1651325	LOC653493	6.60735	6.399	6.74937	6.52725	6.70745	6.58649	6.57468	6.57229	6.57291	6.52045	6.65797	6.43493	0.0474532	0.7143	0.0692752	0.455183	0.0355063	0.613775
ILMN_1651328	LAT1-3TM	6.83359	6.92842	6.89668	6.95177	6.86491	6.86058	6.87804	6.9116	6.84949	6.7839	6.88201	6.95659	0.0120632	0.84341	0.0182532	0.769331	0.00554347	0.921923
ILMN_1651329	LOC646360	6.75338	6.62437	6.75839	6.59385	6.63337	6.5982	6.56867	6.59584	6.64169	6.59708	6.60697	6.6538	0.0927657	0.120933	-0.0108139	0.641529	-0.0172155	0.566181
ILMN_1651330	KCNG4	6.62682	6.48882	6.55819	6.56709	6.45995	6.52372	6.51783	6.52581	6.58348	6.52842	6.52647	6.55064	0.0227641	0.6048	-0.0182542	0.599612	0.00719986	0.760777
ILMN_1651336	MLYCD	6.90671	6.94623	6.90541	6.93667	6.90025	6.89854	6.79616	6.76078	6.94224	6.95302	6.86243	6.86099	0.0273027	0.457762	0.0196716	0.58188	-0.0590891	0.403634
ILMN_1651339	UHRF1BP1L	6.65117	6.66829	6.62864	6.68485	6.68333	6.81877	6.70883	6.66249	6.58649	6.65093	6.66947	6.62377	0.00130637	0.944231	0.080928	0.158934	0.00454178	0.910745
ILMN_1651341	LOC401010	6.96486	7.04451	6.97785	6.86666	7.049	7.11473	6.96932	7.023	7.03675	6.87977	6.93196	6.99375	0.0605797	0.215023	0.0749715	0.408037	0.0745318	0.127418
ILMN_1651343	ITGA11	6.76194	6.7063	6.80413	6.81989	6.83485	6.71673	6.76459	6.7149	6.73072	6.6632	6.76459	6.77614	0.0228151	0.643923	0.0558516	0.340233	0.00209469	0.959488
ILMN_1651346	TICAM2	7.62627	7.6959	7.51161	7.69179	7.57584	7.70995	7.55856	7.64726	7.56208	7.46314	7.45999	7.4651	0.148518	0.0506801	0.196449	0.00949317	0.126555	0.0120741
ILMN_1651347	SERTAD2	9.80204	9.87118	9.68616	9.82441	9.72852	9.87666	9.96727	9.55786	9.86985	9.74782	9.75693	9.6663	0.0627765	0.362853	0.0861812	0.173262	0.074644	0.587699
ILMN_1651351	LOC729444	6.63118	6.58348	6.60772	6.66427	6.50836	6.58949	6.45701	6.6376	6.71027	6.5714	6.64061	6.48614	0.0414104	0.425747	0.0213213	0.753627	0.0355766	0.70526
ILMN_1651354	SPP1	8.22915	8.42524	8.37207	8.39007	8.66278	8.4681	8.4523	8.67295	8.2925	8.78247	8.8689	8.79865	-0.474518	0.0017952	-0.30969	0.022166	-0.344089	0.0386589
ILMN_1651358	HBE1	6.62828	6.70042	6.6852	6.68888	6.70607	6.76658	6.76459	6.82376	6.70883	6.69869	6.64783	6.76404	-0.032219	0.46742	0.0169912	0.700283	0.0622101	0.258322
ILMN_1651364	PCBD2	6.97175	6.89446	6.99526	6.99112	7.03063	7.02493	6.96678	6.90541	6.99352	7.04551	7.0812	7.00982	-0.0916844	0.0672162	-0.0299491	0.280362	-0.0902707	0.0532236
ILMN_1651365	ZBED2	6.52803	6.48332	6.49356	6.52072	6.66746	6.58361	6.55308	6.50678	6.53621	6.50915	6.63337	6.59223	-0.0766143	0.12062	0.0123444	0.836462	-0.0462269	0.301044
ILMN_1651369	LOC652300	6.85914	6.94725	6.93	6.87527	6.88261	6.87271	7.07788	7.03941	6.84668	6.89552	6.96688	6.97799	-0.0346709	0.405737	-0.0699307	0.0547401	0.0411903	0.616824
ILMN_1651370	USP21	6.73015	6.57316	6.58674	6.67959	6.64974	6.70388	6.61877	6.65404	6.76899	6.65237	6.66379	6.51311	0.0202626	0.785935	0.0679815	0.252655	0.0708457	0.345829
ILMN_1651373	RHD	6.58147	6.57757	6.57884	6.67277	6.56874	6.62133	6.61705	6.55704	6.54255	6.59248	6.6055	6.65833	-0.0394741	0.12192	0.00217617	0.954894	-0.0465535	0.200705
ILMN_1651378	AUP1	9.11655	9.4512	9.12261	9.09693	9.18164	9.20559	9.29334	8.8681	9.39367	9.25526	9.06869	9.1186	0.0826044	0.541212	0.0138697	0.840936	0.0375159	0.836592
ILMN_1651380	LOC644783	6.72221	6.70757	6.76249	6.69869	6.77032	6.64206	6.73951	6.69405	6.74959	6.72459	6.64061	6.72579	0.0337572	0.359284	0.0066914	0.892777	0.0307214	0.404145
ILMN_1651385	MFN2	8.79036	8.60593	8.85015	8.49105	8.54202	8.61408	8.7535	8.82699	8.8779	8.63354	8.69182	8.51523	0.135282	0.207243	-0.0644787	0.364148	0.205935	0.0312287
ILMN_1651388	LOC645448	6.58147	6.53044	6.60327	6.57291	6.64314	6.60241	6.58761	6.55538	6.61153	6.67337	6.57449	6.58223	-0.0383008	0.374878	-0.00387697	0.92307	-0.0251879	0.519091
ILMN_1651395	LOC644897	6.5615	6.53699	6.58511	6.59534	6.67277	6.60845	6.60104	6.72436	6.57582	6.62341	6.66225	6.6173	-0.0731166	0.0208935	-0.00879782	0.767155	-0.000578844	0.990957
ILMN_1651396	LOC643038	6.5615	6.50935	6.54448	6.73766	6.62742	6.5344	6.6495	6.61926	6.61766	6.62194	6.62437	6.53925	-0.0567462	0.150018	0.0379695	0.590853	0.0336158	0.322838
ILMN_1651403	LOC642161	6.69903	6.8611	6.72425	6.66142	6.81675	6.77032	6.70883	6.8765	6.75227	6.71227	6.63917	6.62864	0.101436	0.148679	0.0894741	0.166741	0.119178	0.103459
ILMN_1651404	LILRA6	6.56595	6.58649	6.58836	6.66427	6.65428	6.61583	6.60993	6.66379	6.61595	6.66734	6.57449	6.63675	-0.0459294	0.179256	0.0185952	0.581555	0.00369603	0.914139
ILMN_1651405	BRD9	9.8973	9.60643	9.58225	9.62626	9.54571	9.77805	9.79163	9.49317	9.74242	9.63401	9.46044	9.54536	0.14872	0.258314	0.103403	0.288508	0.129137	0.28651
ILMN_1651408	LOC648934	6.83359	6.73535	6.80036	6.67842	6.68205	6.71181	6.69248	6.54962	6.64902	6.70262	6.66652	6.62084	0.126437	0.0275623	0.0274321	0.349537	-0.0329548	0.533731
ILMN_1651415	DERL3	6.68205	6.75917	6.71193	6.65369	6.69312	6.69242	6.74825	6.75817	6.69625	6.67742	6.7459	6.70745	0.00745411	0.815686	-0.0305161	0.267658	0.0239652	0.434142
ILMN_1651428	SYTL2	6.74613	6.80842	6.72152	6.83779	6.76404	6.75644	6.72056	6.79616	6.68193	6.74367	6.64783	6.68969	0.0649621	0.161891	0.0923628	0.0718405	0.0391539	0.419259
ILMN_1651429	SELM	7.73077	7.67084	7.7867	7.52148	7.6967	7.46993	7.82957	7.83827	7.94381	7.66146	7.61945	7.82031	0.0290302	0.698487	-0.137702	0.208526	0.170145	0.0755769
ILMN_1651430	CTRB2	6.60587	6.54022	6.62255	6.52725	6.59061	6.48278	6.62035	6.65117	6.5714	6.60142	6.671	6.57291	-0.0255657	0.542717	-0.0815654	0.129049	-0.000803433	0.983829
ILMN_1651433	DCK	8.14253	8.09792	8.00168	8.07862	7.91446	8.16132	7.911	7.72032	7.68367	7.89138	7.93281	7.79018	0.20925	0.0243157	0.180006	0.0987862	-0.0997967	0.291605
ILMN_1651435	LOC653148	6.57557	6.55116	6.65833	6.72846	6.64314	6.60389	6.63337	6.53479	6.58348	6.55436	6.76735	6.60476	-0.0471374	0.548327	0.0163404	0.836138	-0.0582765	0.453634
ILMN_1651437	FOXI1	6.58611	6.61116	6.62109	6.57582	6.6471	6.6256	6.56867	6.61067	6.6071	6.61018	6.64482	6.6756	-0.0374127	0.157868	-0.0273609	0.388869	-0.0480513	0.106968
ILMN_1651438	ZFPM1	8.25698	8.28846	8.50265	8.10598	8.25265	8.24724	8.2279	8.52858	8.46439	8.333	8.29726	8.1979	0.0733091	0.447451	-0.0740934	0.30317	0.130903	0.260504
ILMN_1651447	LOC651463	6.78923	6.58949	6.53362	6.60587	6.65117	6.75227	6.5036	6.63349	6.48815	6.54705	6.62267	6.61913	0.0411587	0.639715	0.0734845	0.21406	-0.0545409	0.355566
ILMN_1651453	LOC652663	6.58611	6.63627	6.65249	6.68626	6.60722	6.5615	6.56867	6.67277	6.59385	6.67483	6.72527	6.60956	-0.0449323	0.31345	-0.0515619	0.35633	-0.0581256	0.273944
ILMN_1651456	UTY	6.64674	6.61693	6.60932	6.55321	6.51993	6.67159	6.67618	6.50241	6.51297	6.56404	6.57745	6.56011	0.0571304	0.0104507	0.0143797	0.771719	-0.00334611	0.955608
ILMN_1651457	GPR32	6.65988	6.65833	6.57884	6.62011	6.61399	6.73343	6.64049	6.5541	6.62718	6.63506	6.66071	6.69114	-0.0299564	0.392526	-0.00646094	0.885411	-0.0550487	0.154114
ILMN_1651464	KDM2B	6.62536	6.78325	6.73162	6.73985	6.61264	6.70757	6.60993	6.7149	6.71353	6.67742	6.66794	6.57013	0.0749113	0.264415	0.048187	0.400896	0.0409569	0.448809
ILMN_1651466	ALOX5	6.52006	6.62267	6.5714	6.6563	6.62377	6.63361	6.66273	6.54384	6.50915	6.62742	6.58774	6.59857	-0.0331974	0.35681	0.0333215	0.0944474	-0.0326687	0.533368
ILMN_1651470	MMP17	6.5615	6.69509	6.60327	6.54756	6.68835	6.55538	6.54847	6.60895	6.59993	6.71364	6.59061	6.6538	-0.0327282	0.570937	-0.0555879	0.391142	-0.0669021	0.171458
ILMN_1651477	LOC652224	7.28346	6.72164	6.67923	6.57443	6.70745	6.6645	6.69532	6.71776	6.69457	6.62608	6.80047	6.73219	0.175196	0.433086	-0.0707881	0.331478	-0.0170296	0.756589
ILMN_1651486	COX11P	6.82589	6.76602	6.77406	6.8112	6.79042	6.81248	6.80413	6.73585	6.64025	6.75026	6.86748	6.77778	-0.00984977	0.81785	0.00619744	0.872042	-0.0717629	0.292526
ILMN_1651488	LOC644234	6.69903	6.66545	6.7255	6.72198	6.61546	6.64771	6.62035	6.66622	6.68602	6.68578	6.69382	6.60956	0.0336047	0.352628	-0.00134014	0.975737	-0.00552189	0.875789
ILMN_1651490	CYP26A1	6.57884	6.71776	6.63155	6.59223	6.59621	6.62011	6.58022	6.62377	6.60587	6.6495	6.73512	6.61104	-0.0225039	0.701502	-0.0623698	0.173323	-0.0619337	0.18558
ILMN_1651492	WNT2B	6.64974	6.66545	6.70757	6.67136	6.54988	6.66852	6.65833	6.63203	6.68193	6.64086	6.64338	6.7585	-0.00666208	0.882944	-0.0509937	0.412082	-0.0234814	0.60082
ILMN_1651495	LOC644824	6.51508	6.52229	6.67383	6.51927	6.65821	6.58811	6.5331	6.60735	6.54705	6.55296	6.61116	6.59061	-0.0145113	0.80317	0.00362393	0.937722	-0.0224097	0.474967
ILMN_1651496	HIST1H2BD	8.99941	8.76766	8.91192	9.07427	9.23071	8.99214	9.01175	9.3401	9.20059	9.49885	9.45461	9.44976	-0.574739	0.00115711	-0.368698	0.00677988	-0.283588	0.0423343
ILMN_1651498	GADD45G	6.6195	6.50823	6.54448	6.51927	6.59186	6.58649	6.57316	6.54384	6.58786	6.56049	6.59509	6.58699	-0.0234556	0.532666	-0.0149839	0.58952	-0.0125694	0.491902
ILMN_1651499	ERGIC1	7.41133	7.5292	7.42023	7.44666	7.30562	7.41407	7.44185	7.2797	7.3383	7.35649	7.2462	7.47434	0.0945783	0.281226	0.0297749	0.723622	-0.00572363	0.947159
ILMN_1651501	ABCD4	6.77274	6.66829	6.76382	6.57884	6.7412	6.65726	6.61411	6.59857	6.65809	6.60439	6.7063	6.74232	0.0506121	0.394794	-0.0252386	0.706913	-0.0607445	0.248277
ILMN_1651504	FAM193A	8.23622	8.19268	8.27405	8.338	8.11363	8.18321	8.21467	8.32282	8.45558	8.04361	8.20464	8.12965	0.108349	0.106187	0.0856454	0.349994	0.205058	0.070614
ILMN_1651506	NCOA6IP	7.32014	7.31951	7.04669	7.36245	7.3198	7.43077	7.30532	7.23959	7.13778	7.3416	7.28573	7.24829	-0.0630926	0.542918	0.079134	0.133905	-0.064311	0.313075
ILMN_1651507	LOC642732	6.48922	6.6273	6.58836	6.71124	6.72504	6.61276	6.61411	6.54962	6.54255	6.56709	6.63482	6.60476	-0.0339286	0.497584	0.0807938	0.116252	-0.0334633	0.327685
ILMN_1651508	LOC649500	6.63373	6.69636	6.58511	6.50241	6.57026	6.72686	6.69114	6.6376	6.70469	6.69149	6.63917	6.55231	0.0107458	0.845824	-0.0278134	0.739027	0.0501534	0.331869
ILMN_1651513	SKIV2L2	8.43022	8.40473	8.26185	8.67049	8.66972	8.63058	8.10912	8.49955	7.82746	8.28179	8.36394	8.30126	0.0499408	0.437485	0.341267	0.000262671	-0.170285	0.434903
ILMN_1651520	LOC648170	6.55679	6.59409	6.69405	6.60993	6.6569	6.59993	6.56722	6.62912	6.53777	6.58649	6.60389	6.51875	0.0452658	0.40361	0.0525451	0.16904	0.00832573	0.834767
ILMN_1651532	LOC644519	6.65988	6.66285	6.63421	6.71536	6.67413	6.56861	6.57468	6.60327	6.6256	6.65237	6.64938	6.65093	0.00141828	0.884088	0.00180589	0.969021	-0.04971	0.0281075
ILMN_1651535	TMEM217	6.65845	6.63337	6.6453	6.62011	6.54377	6.5615	6.63892	6.65404	6.6901	6.62194	6.67842	6.66794	-0.0103941	0.609714	-0.0809707	0.0485291	0.00492093	0.841377
ILMN_1651536	GEFT	6.62377	6.59409	6.66568	6.629	6.64458	6.52045	6.62169	6.58874	6.56278	6.54705	6.61264	6.54577	0.0593625	0.121766	0.029525	0.546302	0.0225825	0.463605
ILMN_1651538	NUMBL	7.02429	6.88018	6.94351	6.89214	7.049	6.96588	7.0674	6.82895	7.03562	7.07881	7.094	6.9397	-0.0881781	0.242899	-0.0684976	0.36319	-0.0601798	0.537886
ILMN_1651543	LOC652451	6.56734	6.60327	6.58836	6.50994	6.51113	6.51888	6.61411	6.60895	6.57733	6.63349	6.57884	6.51875	0.00930073	0.80212	-0.0637058	0.127887	0.0231048	0.546035
ILMN_1651544	HDAC8	6.82069	6.94725	6.93539	6.9235	7.03822	6.9082	6.97447	6.85985	6.90716	6.9717	6.94846	6.93432	-0.0503848	0.294507	0.00514463	0.909386	-0.0376677	0.342337
ILMN_1651547	SEMA3E	6.63373	6.60179	6.61091	6.64206	6.57468	6.65571	6.73128	6.61668	6.59534	6.61018	6.60697	6.83768	-0.0694696	0.417761	-0.0607971	0.491514	-0.0371802	0.691979
ILMN_1651554	RGS5	6.70192	6.63929	6.73026	6.81708	6.67413	6.7459	6.67066	6.75817	6.64025	6.59558	6.61558	6.58699	0.0911055	0.0318841	0.146317	0.0255089	0.0903063	0.0678805
ILMN_1651557	KDELC2	8.86361	8.77308	8.86506	9.10588	8.95885	8.87877	8.60602	8.78077	8.47142	8.60091	8.81578	8.77725	0.102599	0.231548	0.24985	0.0561681	-0.111909	0.371664
ILMN_1651563	MYO15B	6.60439	6.85095	6.58674	6.6465	6.74254	6.61583	6.57026	6.67665	6.58047	6.57443	6.61987	6.60327	0.0815011	0.398478	0.0691026	0.162437	0.00993757	0.798359
ILMN_1651565	LOC650677	6.65547	6.63772	6.61239	6.5982	6.69591	6.64902	6.63482	6.68064	6.6973	6.6594	6.74982	6.56849	-0.0240424	0.678181	-0.0115274	0.855738	0.0116837	0.843769
ILMN_1651567	WHSC1	6.6671	6.61815	6.67665	6.68485	6.54216	6.4334	6.76591	6.5177	6.59385	6.58035	6.57884	6.67853	0.0413969	0.33308	-0.0591018	0.500703	0.0132477	0.877242
ILMN_1651568	MUC13	6.67253	6.59558	6.58674	6.70986	6.68333	6.69242	6.69996	6.70342	6.73535	6.60142	6.56163	6.61913	0.0242254	0.492609	0.101145	0.00565746	0.118847	0.00431947
ILMN_1651569	XRCC2	6.71981	6.70492	6.701	6.72323	6.72015	6.7063	6.76856	6.6489	6.70745	6.72584	6.72232	6.68637	-0.00293529	0.842549	0.00504922	0.730087	-0.00320513	0.934738
ILMN_1651574	AQP3	6.81681	6.70757	6.66273	6.67959	6.72346	6.62011	6.76005	6.60735	6.63155	6.71227	6.75561	6.62706	0.0307221	0.631883	-0.0239263	0.645621	-0.0319965	0.625382
ILMN_1651576	LOC645947	6.65988	6.67806	6.59422	6.66427	6.64193	6.66308	6.61411	6.65117	6.74266	6.61153	6.66947	6.69718	-0.015342	0.690716	-0.00296984	0.915391	0.00991905	0.839078
ILMN_1651582	LOC646307	6.66285	6.65833	6.64968	6.81867	6.72346	6.66852	6.58611	6.63203	6.7367	6.69451	6.69938	6.70446	-0.0424991	0.00090828	0.0374335	0.442406	-0.0478347	0.344382
ILMN_1651584	LOC643576	6.68064	6.50241	6.54615	6.70883	6.66616	6.63651	6.72346	6.73951	6.73072	6.77516	6.66794	6.68041	-0.131437	0.106929	-0.0373317	0.401695	0.0233948	0.531166
ILMN_1651597	FBXO44	6.65547	6.6435	6.64242	6.51455	6.58911	6.5615	6.63892	6.61067	6.66664	6.57884	6.65797	6.6003	0.034761	0.221009	-0.0573131	0.148964	0.0263733	0.408984
ILMN_1651599	ENTPD2	6.55218	6.65976	6.5714	6.75093	6.64314	6.60685	6.61411	6.63203	6.66533	6.6538	6.5982	6.60808	-0.0255824	0.530382	0.0469477	0.370086	0.0171321	0.493686
ILMN_1651604	MARK4	6.63675	6.67806	6.75472	6.67959	6.62499	6.69892	6.68789	6.72436	6.62096	6.59993	6.63917	6.6664	0.0546802	0.239276	0.0326666	0.328271	0.0425725	0.301323
ILMN_1651606	LOC653210	6.67112	6.61693	6.66415	6.70883	6.72504	6.60537	6.65237	6.56741	6.65511	6.63651	6.69498	6.71788	-0.0323893	0.335402	-0.00337384	0.943368	-0.0581605	0.197035
ILMN_1651608	LOC649683	6.53128	6.57013	6.59906	6.55487	6.49069	6.60241	6.57657	6.61668	6.62096	6.57291	6.61411	6.62084	-0.0357981	0.220822	-0.0533002	0.209393	0.0021159	0.923131
ILMN_1651609	SPRED3	6.63965	6.70192	6.63953	6.60587	6.71502	6.54222	6.70745	6.57971	6.63735	6.65237	6.62875	6.64025	0.0199106	0.414025	-0.0194212	0.722258	0.00104824	0.979071
ILMN_1651610	LOC730525	7.01561	7.08722	7.20074	6.97342	7.00883	6.93412	7.28124	7.00726	7.12439	7.10823	7.12534	6.99705	0.0243161	0.735944	-0.104748	0.0833828	0.0607584	0.532187
ILMN_1651617	CTNNB1	7.04069	7.01348	6.99892	7.03913	6.99375	7.00277	7.00557	6.85634	6.88251	6.92902	6.86512	7.24165	0.00577021	0.963022	-4.2966e-05	0.999725	-0.0971195	0.480897
ILMN_1651624	C6orf201	6.56303	6.63772	6.69265	6.6465	6.61129	6.63095	6.68345	6.61386	6.62718	6.7385	6.67689	6.671	-0.0643287	0.211748	-0.0658845	0.0508245	-0.053966	0.149929
ILMN_1651628	EXOC6	7.51865	7.44822	7.4114	7.55872	7.52531	7.52913	7.25576	7.31519	7.18096	7.44734	7.29802	7.26642	0.122167	0.129145	0.200461	0.024222	-0.0866229	0.271553
ILMN_1651636	CYP2A13	6.69903	6.70192	6.75338	6.66734	6.72346	6.64902	6.75711	6.6307	6.66988	6.77021	6.68975	6.69718	-0.000936135	0.97747	-0.0391065	0.314956	-0.0331484	0.505147
ILMN_1651637	CRSP2	6.67524	6.73162	6.75338	6.79777	6.7048	6.78291	6.83947	6.80187	6.78608	6.77516	6.83253	6.68205	-0.043163	0.433685	-0.00141726	0.979749	0.0458911	0.380666
ILMN_1651641	LOC643069	6.62961	6.57896	6.54615	6.58786	6.56569	6.54513	6.51482	6.67959	6.60858	6.6594	6.58924	6.54242	-0.0121118	0.786269	-0.0307918	0.44249	0.00397756	0.94913
ILMN_1651642	GPC2	7.54469	7.6433	7.59541	7.49711	7.5124	7.63749	7.74956	7.63716	7.6757	7.64559	7.58792	7.60345	-0.0178513	0.620084	-0.0633179	0.254952	0.0751578	0.1135
ILMN_1651643	ASB11	6.62377	6.60179	6.58986	6.62145	6.61546	6.55845	6.59919	6.62377	6.68333	6.69591	6.45296	6.61104	0.0185036	0.809539	0.0118166	0.88081	0.0487954	0.553005
ILMN_1651652	RTN3	6.62682	6.63772	6.60624	6.66852	6.64842	6.60685	6.62328	6.64458	6.60142	6.60142	6.63021	6.65093	-0.00392923	0.829226	0.0137443	0.58462	-0.00442644	0.827313
ILMN_1651656	PSG7	6.57557	6.55743	6.63009	6.63191	6.49243	6.59993	6.58761	6.52581	6.55359	6.51389	6.58486	6.4941	0.056747	0.181805	0.0438083	0.433678	0.0247234	0.493436
ILMN_1651657	ADAM33	6.6195	6.69242	6.62414	6.66285	6.60439	6.65034	6.57657	6.67018	6.64458	6.58649	6.59659	6.63021	0.0409238	0.204525	0.0347619	0.191624	0.0260151	0.44724
ILMN_1651660	TMEM191B	6.58147	6.54164	6.671	6.65892	6.69834	6.70388	6.62754	6.67277	6.58047	6.62194	6.61116	6.52045	0.0135187	0.800212	0.102527	0.0434117	0.0424068	0.367545
ILMN_1651662	LOC643899	6.6483	6.72459	6.51613	6.55959	6.73535	6.55691	6.70745	6.68847	6.57001	6.61766	6.76327	6.69718	-0.0630311	0.442478	-0.0754208	0.35698	-0.0373956	0.567957
ILMN_1651664	SDHALP1	6.63118	6.82757	6.68672	6.63929	6.75678	6.71673	6.68485	6.54666	6.6388	6.72062	6.69242	6.73072	0.000574003	0.992772	-0.0103168	0.790571	-0.091145	0.0969611
ILMN_1651672	LOC646717	6.55679	6.65093	6.58986	6.57582	6.62608	6.68474	6.63747	6.66474	6.61005	6.66189	6.6376	6.65093	-0.0509477	0.147886	-0.021261	0.545734	-0.0127177	0.502542
ILMN_1651680	LOC649150	13.7984	13.7173	13.6875	13.7498	13.8463	13.6425	13.6515	13.649	13.6059	13.7793	13.7425	13.7114	-0.0100177	0.807553	0.00178336	0.97845	-0.10893	0.0113891
ILMN_1651681	WDFY3	6.7133	6.77701	6.64242	6.65237	6.67806	6.59385	6.70135	6.62377	6.56709	6.66604	6.61852	6.56163	0.0955124	0.124265	0.026027	0.542439	0.015338	0.771009
ILMN_1651684	KIAA0586	7.33722	7.41992	7.28826	7.42805	7.33982	7.40253	7.26677	7.31377	7.21514	7.32096	7.32847	7.43087	-0.011634	0.834793	0.0300353	0.533131	-0.094871	0.105282
ILMN_1651685	C8ORFK32	6.57884	6.61116	6.72004	6.60439	6.55845	6.60993	6.69683	6.70883	6.58348	6.6538	6.56659	6.68485	0.0015993	0.978382	-0.0441592	0.320575	0.0279673	0.627934
ILMN_1651690	PGBD4	6.65702	6.61962	6.8052	6.82641	6.66106	6.71673	6.62462	6.71021	6.60858	6.75828	6.68228	6.75573	-0.0381482	0.571065	0.00264064	0.96374	-0.0842921	0.104027
ILMN_1651692	STK10	7.29619	7.31796	7.37415	7.21644	7.26786	7.22872	7.32134	7.3396	7.51672	7.37318	7.23971	7.38788	-0.00415668	0.940746	-0.095921	0.125353	0.0589594	0.492439
ILMN_1651693	GSG1	6.57051	6.58348	6.73162	6.69718	6.66106	6.6658	6.6495	6.7487	6.68731	6.69149	6.64206	6.64482	-0.0309192	0.598285	0.0152251	0.481444	0.0357105	0.340816
ILMN_1651699	EPS8	7.92847	8.21983	8.25916	8.1206	8.12215	8.36083	7.90162	7.82498	7.59862	8.04456	7.98381	7.9766	0.134164	0.276243	0.199531	0.0732885	-0.226586	0.0724531
ILMN_1651705	CAT	7.63613	7.6274	7.63166	7.69307	7.71476	7.6737	7.46245	7.60515	7.41133	7.73094	7.8639	7.72331	-0.140985	0.0367845	-0.0788715	0.169748	-0.279738	0.0192629
ILMN_1651708	RESP18	6.62377	6.63167	6.60191	6.57884	6.6347	6.58649	6.62754	6.5615	6.62389	6.56849	6.79918	6.69405	-0.068121	0.368518	-0.0872312	0.274414	-0.0829246	0.301976
ILMN_1651710	IQCD	6.67253	6.71473	6.60624	6.59074	6.58761	6.62401	6.68649	6.52868	6.78608	6.63796	6.63021	6.55064	0.0582283	0.239194	-0.00548529	0.864875	0.060809	0.489328
ILMN_1651711	LOC728005	6.58448	6.64206	6.60772	6.59968	6.45605	6.5982	6.56582	6.67959	6.6756	6.61018	6.58924	6.58911	0.0152426	0.447819	-0.0448676	0.404108	0.0441595	0.309001
ILMN_1651712	RBM11	6.81393	6.77032	6.86934	6.90531	6.8143	6.81099	6.87956	6.74097	6.70745	6.82858	6.80778	6.73219	0.0283463	0.527085	0.0540161	0.273351	-0.01352	0.833507
ILMN_1651715	RNF2	6.63518	6.59409	6.63421	6.64794	6.63892	6.68858	6.55014	6.65809	6.62096	6.72192	6.63482	6.68205	-0.0584338	0.110398	-0.021113	0.513004	-0.0698643	0.159239
ILMN_1651717	ADAMTS20	6.67665	6.63167	6.52032	6.52229	6.49243	6.69242	6.68064	6.54666	6.62096	6.57443	6.52366	6.58561	0.0483169	0.390508	0.00781364	0.910304	0.0548586	0.272851
ILMN_1651719	MBTPS1	9.48202	9.52171	9.55786	9.30983	9.3465	9.26097	9.14326	9.2725	9.29344	9.34695	9.36273	9.23803	0.204626	0.0103635	-0.0101356	0.837689	-0.0795027	0.263569
ILMN_1651727	LOC648473	6.65273	6.53207	6.6483	6.58335	6.60005	6.7133	6.53608	6.57064	6.59385	6.56049	6.61116	6.6003	0.0203815	0.655842	0.0415857	0.394474	-0.0237927	0.355242
ILMN_1651735	TGOLN2	8.9822	9.09632	8.70001	9.1355	8.89309	9.03703	9.08774	8.63799	9.0102	9.00584	8.95831	8.92744	-0.0376864	0.769127	0.0580111	0.476825	-0.051889	0.730919
ILMN_1651737	LOC644689	6.72471	6.71913	6.74097	6.54255	6.66746	6.88657	6.74691	6.72311	6.65809	6.6901	6.75695	6.69996	0.0126005	0.594909	-0.0168075	0.877916	-0.00629707	0.861045
ILMN_1651741	ARMCX3	6.78803	6.75772	6.81334	6.70411	6.74853	6.7927	6.87221	6.84532	6.93334	6.85862	6.73377	6.75573	0.00366024	0.934283	-0.0342562	0.49961	0.100917	0.0956081
ILMN_1651745	TMEM25	6.74613	6.76349	6.73162	6.65892	6.73026	6.7449	6.75584	6.72436	6.81708	6.71639	6.83359	6.75573	-0.0214869	0.579165	-0.0572067	0.258687	-0.00280759	0.952069
ILMN_1651752	CXorf21	6.88363	6.67242	6.77021	6.64794	6.62377	6.73636	6.68345	6.69265	6.7242	6.60142	6.59968	6.78248	0.114227	0.254987	0.00816893	0.912267	0.0389093	0.563655
ILMN_1651758	LOC645643	6.66994	6.54022	6.63723	6.64794	6.6029	6.55256	6.57026	6.60463	6.72095	6.62462	6.60697	6.47118	0.0482055	0.481508	0.033545	0.579855	0.0643558	0.388287
ILMN_1651760	LOC646537	6.63373	6.63929	6.60772	6.73377	6.59323	6.77756	6.55666	6.57229	6.67253	6.6632	6.71422	6.63349	-0.0433903	0.164105	0.0312177	0.632494	-0.0698098	0.18209
ILMN_1651763	TFDP3	6.65547	6.54022	6.60191	6.51927	6.58473	6.54513	6.56722	6.57971	6.46697	6.51232	6.54305	6.57013	0.0573648	0.198416	0.00787691	0.771294	-0.00386805	0.92651
ILMN_1651767	MKL1	6.90541	6.78803	6.87497	6.86563	6.8338	6.74355	6.76856	6.82757	6.83622	6.86758	6.85924	6.84062	0.000324092	0.993259	-0.0414839	0.329767	-0.0450285	0.118349
ILMN_1651769	ZFYVE16	6.872	6.9604	6.92043	7.15608	7.03063	7.00838	6.79875	6.93804	6.9013	6.9931	6.99691	6.90415	-0.0471124	0.300396	0.100307	0.142605	-0.0853592	0.172966
ILMN_1651771	RRAGB	6.67524	6.65535	6.58348	6.66023	6.59186	6.58949	6.65678	6.59584	6.65666	6.63941	6.52647	6.63844	0.0365856	0.47728	0.012416	0.792182	0.0349883	0.457876
ILMN_1651776	FHOD1	8.44954	8.26266	8.48485	8.30302	8.33475	8.31098	8.45459	8.49462	8.62272	8.38565	8.49905	8.51818	-0.0686076	0.441512	-0.151374	0.0234481	0.0563488	0.437706
ILMN_1651787	MSH5	6.68205	6.67242	6.8052	6.64061	6.57165	6.72323	6.8142	6.75817	6.70307	6.80713	6.64338	6.73365	-0.00816666	0.904316	-0.0828928	0.268202	0.0304241	0.622955
ILMN_1651788	MAP3K11	7.75811	7.8289	8.06277	7.93122	7.83658	7.90262	7.96791	8.0373	7.98148	7.86935	7.8011	7.96071	0.00620665	0.954845	0.0130853	0.820669	0.118511	0.0803196
ILMN_1651789	VCX2	6.55845	6.54821	6.49056	6.56709	6.58624	6.62401	6.55308	6.61214	6.56557	6.65809	6.65082	6.56696	-0.0928869	0.0616701	-0.0328431	0.384767	-0.0483581	0.231631
ILMN_1651792	RORC	6.58874	6.76182	6.6256	6.57165	6.67413	6.73884	6.71307	6.65809	6.55359	6.70135	6.61411	6.59546	0.0217464	0.743213	0.0245643	0.696615	0.00461197	0.939434
ILMN_1651799	SLC38A2	10.9077	10.9057	10.9514	11.2422	11.2009	11.1506	10.6758	10.7536	10.2957	10.8305	10.9906	10.9832	-0.0131677	0.820204	0.263141	0.0108454	-0.359756	0.0754961
ILMN_1651800	GSTM4	6.49416	6.65237	6.67806	6.53349	6.72504	6.60241	6.57657	6.68602	6.65964	6.57443	6.69498	6.48197	0.0244058	0.786614	0.0365226	0.683741	0.0569522	0.461127
ILMN_1651806	LOC653801	6.63675	6.62267	6.68672	6.64494	6.65547	6.57908	6.61411	6.63917	6.61913	6.61913	6.5181	6.59223	0.0722269	0.114693	0.0500119	0.263984	0.047649	0.201
ILMN_1651811	LOC729269	6.6671	6.75772	6.69822	6.57733	6.71353	6.68474	6.78466	6.7149	6.63312	6.63941	6.66522	6.54074	0.0925587	0.116338	0.0434088	0.482842	0.0957726	0.173648
ILMN_1651817	GRIK1	6.57557	6.64639	6.63155	6.61705	6.57468	6.66	6.62608	6.70745	6.71181	6.70262	6.67383	6.52045	-0.0144669	0.822792	-0.0150575	0.819115	0.0494824	0.476353
ILMN_1651819	GALNT11	8.16015	8.19207	8.29607	8.1733	8.13999	8.14854	8.10693	8.13068	8.08853	8.18041	8.24465	8.14078	0.0274832	0.618465	-0.0346699	0.337789	-0.0798998	0.0705392
ILMN_1651826	BASP1	9.56204	9.5258	9.60431	9.38126	9.56011	9.44162	9.71691	9.82653	9.64252	9.81195	9.58376	9.73408	-0.145884	0.108071	-0.248931	0.0430462	0.0187242	0.837713
ILMN_1651828	CCT3	10.2402	10.2551	10.2793	10.2187	10.0118	10.1691	9.81015	9.72688	10.0981	9.9485	9.97715	9.92019	0.309623	0.000101762	0.184582	0.0458364	-0.0702364	0.570041
ILMN_1651832	EHD1	10.1907	10.2326	10.0981	10.1865	10.0803	9.98792	10.2297	9.79991	10.2623	10.0371	10.0496	10.1332	0.100449	0.114289	0.0115832	0.866831	0.0239747	0.882324
ILMN_1651838	RND1	6.62828	6.63482	6.62718	6.75338	6.61399	6.50373	6.55308	6.65964	6.68864	6.55155	6.53479	6.60327	0.0668889	0.0321644	0.0604999	0.465719	0.0705875	0.20031
ILMN_1651846	LOC400954	6.69903	6.65678	6.4452	6.6563	6.57026	6.68975	6.58311	6.48029	6.61153	6.55296	6.49203	6.50426	0.0839216	0.357087	0.122355	0.0381566	0.0418939	0.394878
ILMN_1651848	ITSN1	6.64422	6.67665	6.59422	6.63929	6.55256	6.54061	6.65976	6.64746	6.61595	6.79183	6.67842	6.6157	-0.0569522	0.373097	-0.11783	0.121904	-0.0542602	0.365163
ILMN_1651850	RPS16	13.7672	13.8136	13.7905	13.7863	13.7332	13.7248	13.6578	13.6117	13.7276	13.8019	13.65	13.7672	0.0507528	0.348753	0.00843761	0.873732	-0.0739577	0.264018
ILMN_1651865	KIAA1257	6.78923	6.71341	6.671	6.60117	6.75338	6.69892	6.72958	6.61067	6.7255	6.65093	6.67524	6.72289	0.0415263	0.363426	0.00146673	0.977686	0.00556455	0.906175
ILMN_1651872	UBIAD1	8.39913	8.3107	8.39978	8.35288	8.28218	8.27282	8.50297	8.16534	8.63672	8.42648	8.28354	8.29455	0.0350128	0.556449	-0.0322319	0.571876	0.100155	0.534595
ILMN_1651878	EVC	6.67524	6.76182	6.74367	6.68766	6.74501	6.69892	6.72056	6.75361	6.66391	6.7385	6.67842	6.70607	0.0192513	0.574872	0.002868	0.913103	0.00503183	0.880537
ILMN_1651886	CWF19L1	10.1963	10.0913	10.1144	10.1492	10.3944	10.2364	9.79118	9.7273	9.88675	9.88531	9.81086	9.84259	0.287712	0.00170954	0.413735	0.00525699	-0.0445113	0.432928
ILMN_1651899	LOC653314	12.842	12.7441	12.9595	13.1228	13.0275	13.0589	13.0198	12.9968	13.026	12.8331	13.063	12.9441	-0.0982288	0.341159	0.123031	0.162899	0.0674255	0.370943
ILMN_1651900	KCNA4	6.59048	6.60956	6.68064	6.57165	6.52855	6.67159	6.5977	6.79843	6.68864	6.69591	6.53634	6.59857	0.0166243	0.773273	-0.0196756	0.769902	0.0846517	0.318281
ILMN_1651902	RASL11A	6.7289	6.62437	6.66947	6.65237	6.71639	6.65726	6.60993	6.61067	6.59695	6.69996	6.65666	6.72579	-0.019887	0.613602	-0.0187997	0.549628	-0.0882851	0.0128977
ILMN_1651903	LOC645669	6.56449	6.66118	6.57733	6.68766	6.64193	6.60241	6.63046	6.63349	6.59695	6.63191	6.59061	6.6003	-0.00660629	0.850128	0.0363918	0.257867	0.0126914	0.499281
ILMN_1651905	ZNF187	6.68649	6.58811	6.58511	6.66994	6.69068	6.68064	6.51482	6.64458	6.61005	6.74904	6.71799	6.66794	-0.0917517	0.0879266	-0.0312357	0.269226	-0.121838	0.0551132
ILMN_1651913	LOC651357	6.58874	6.7063	6.66273	6.6563	6.58197	6.47779	6.80036	6.66379	6.7412	6.5714	6.75695	6.7394	-0.0366618	0.620268	-0.117226	0.210128	0.045867	0.554228
ILMN_1651916	OCLN	6.71605	6.76182	6.69938	6.73884	6.64055	6.70388	6.83359	6.62377	6.75983	6.72192	6.72981	6.72289	0.000876852	0.965096	-0.030448	0.351101	0.0141905	0.828843
ILMN_1651936	SETD8	8.11651	8.24913	8.15571	8.11867	8.02458	8.15434	8.33292	8.29302	8.17659	8.08939	8.04964	8.01433	0.122663	0.0523894	0.0480769	0.33943	0.216394	0.0138253
ILMN_1651938	LOC649652	6.79183	6.75605	6.79756	6.71536	6.87773	6.69359	6.74825	6.79042	6.74702	6.70951	6.84109	6.71033	0.0281732	0.570225	0.00858208	0.911731	0.00825562	0.866272
ILMN_1651940	OR6C76	6.6029	6.55116	6.67242	6.58185	6.62742	6.60389	6.59497	6.59993	6.59993	6.58961	6.67689	6.50823	0.0172492	0.788181	0.0128122	0.81203	0.00670036	0.897273
ILMN_1651943	ANK3	6.7033	6.72164	6.58348	6.61264	6.68205	6.8175	6.6465	6.8142	6.61153	6.6453	6.63627	6.6756	0.0170841	0.723061	0.0516732	0.44684	0.0383544	0.57938
ILMN_1651944	CTNND1	6.62828	6.6435	6.58836	6.57733	6.69834	6.68333	6.63337	6.64314	6.71776	6.54988	6.61264	6.6632	0.0114747	0.769964	0.0444278	0.42652	0.0561832	0.254296
ILMN_1651949	SCYL3	6.75828	6.83048	6.79183	6.78384	6.89919	6.9082	6.76999	6.81814	6.76591	6.80713	6.77131	6.7394	0.0209151	0.505107	0.0911292	0.110302	0.0120652	0.663985
ILMN_1651950	TPST1	7.78155	7.59303	7.69599	7.61097	7.66989	7.71685	7.58595	7.60595	7.59541	7.59458	7.61492	7.57731	0.0945871	0.16395	0.070304	0.0965519	0.000166583	0.989849
ILMN_1651958	MGP	6.71462	6.70192	6.68205	6.75939	6.83253	6.7376	6.78749	6.76691	6.79324	6.73015	6.71296	6.75983	-0.0347876	0.104908	0.0421936	0.255324	0.0482315	0.038304
ILMN_1651964	ABCC5	7.83249	7.98182	7.95941	7.88148	7.90877	7.89036	7.97748	7.86467	7.89041	7.84767	7.91098	7.84268	0.0574622	0.326419	0.0264222	0.322027	0.043743	0.341899
ILMN_1651966	FGFR3	7.00697	6.89214	6.7332	7.11655	6.79724	6.83727	6.8522	6.72311	7.11706	6.96342	6.8766	6.94351	-0.0504066	0.579065	-0.0108259	0.921961	-0.0303885	0.810862
ILMN_1651967	TP53I3	6.85758	6.83758	6.95962	6.86923	7.00184	6.9069	6.83779	6.94837	6.94224	6.94667	6.91622	6.96068	-0.0562611	0.232337	-0.0151967	0.733246	-0.0317247	0.453026
ILMN_1651980	LOC283767	6.84396	6.71639	6.77131	6.62596	6.72141	6.9049	6.84824	6.81003	6.76899	6.70951	6.71673	6.73648	0.0563121	0.21068	0.0298462	0.735046	0.0881787	0.0220635
ILMN_1651984	LOC653648	6.58749	6.74647	6.57733	6.57443	6.49935	6.54513	6.66746	6.5811	6.54551	6.69869	6.70227	6.64025	-0.0433064	0.499114	-0.140768	0.00902808	-0.0823783	0.117567
ILMN_1651987	C6orf129	8.70176	8.75713	8.78839	8.61877	8.59647	8.61711	8.95447	9.10616	9.03439	8.8042	8.80131	9.01291	-0.123714	0.172107	-0.262024	0.0204613	0.158868	0.126878
ILMN_1652000	FAM156A	6.89557	6.92192	6.79627	6.79918	6.84428	6.76658	6.91329	6.81142	6.81291	7.02217	6.85769	6.9397	-0.0686026	0.323502	-0.136508	0.0602138	-0.0939798	0.181851
ILMN_1652003	GNG10	8.34044	8.37308	8.3545	8.3439	8.40359	8.55967	8.48613	8.70405	8.35119	8.78941	8.88993	8.77126	-0.460859	0.000267868	-0.381147	0.00679403	-0.303076	0.0500817
ILMN_1652006	SMC1A	6.57222	6.59993	6.67665	6.75338	6.7048	6.80295	6.64794	6.71227	6.70745	6.75428	6.7459	6.76867	-0.140016	0.0118334	-0.00257477	0.933754	-0.067065	0.036697
ILMN_1652008	C15orf23	8.58204	8.63323	8.69211	8.57752	8.64204	8.59101	8.68756	8.67988	8.78426	8.78247	8.96536	8.93675	-0.259067	0.0164045	-0.291337	0.008356	-0.17763	0.0545526
ILMN_1652015	LOC647451	6.60587	6.60956	6.59584	6.6901	6.60439	6.7376	6.67066	6.61668	6.52045	6.74624	6.6376	6.69114	-0.0879057	0.049867	-0.0142999	0.789208	-0.0890639	0.174275
ILMN_1652017	PPEF1	6.66415	6.58649	6.61091	6.6029	6.60142	6.61276	6.5629	6.56925	6.63155	6.63046	6.6273	6.6538	-0.0166675	0.532132	-0.0314904	0.0256748	-0.0492835	0.10338
ILMN_1652022	DHX57	6.57393	6.59409	6.72004	6.59385	6.78575	6.66852	6.56125	6.54384	6.72095	6.58498	6.61852	6.65093	0.0112053	0.832082	0.0645589	0.335371	-0.00946893	0.881249
ILMN_1652023	AGFG2	6.64674	6.84292	6.65976	6.65369	6.68578	6.74064	6.57316	6.62645	6.76591	6.63796	6.671	6.62706	0.0711313	0.333307	0.048028	0.168606	0.00983557	0.875618
ILMN_1652024	CSNK1G3	7.61694	7.4139	7.39704	7.48114	7.63852	7.61856	7.17263	7.36516	7.13121	7.2944	7.42566	7.21201	0.16527	0.154021	0.268715	0.0277667	-0.0876907	0.409177
ILMN_1652037	UPP2	6.66285	6.64061	6.61681	6.53349	6.58047	6.68205	6.69248	6.58536	6.52045	6.56709	6.57745	6.7133	0.0208087	0.692604	-0.0206104	0.764779	-0.0198497	0.787309
ILMN_1652056	TTN	6.55679	6.55743	6.49203	6.63191	6.62608	6.59248	6.62169	6.5629	6.49909	6.54551	6.63917	6.6569	-0.0784457	0.126884	0.00296736	0.939402	-0.0526309	0.347363
ILMN_1652065	KCNMB1	6.70895	6.72573	6.64242	6.66734	6.65428	6.62401	6.66273	6.63203	6.65046	6.80981	6.57745	6.7487	-0.0196227	0.804111	-0.0634428	0.420367	-0.0635812	0.415785
ILMN_1652066	SNED1	6.66852	6.64206	6.64968	6.74579	6.71776	6.62401	6.66118	6.8142	6.66533	6.70699	6.58624	6.64639	0.00688069	0.856693	0.0493175	0.385799	0.0670334	0.335043
ILMN_1652072	MGC42105	6.57884	6.63772	6.58035	6.60117	6.65273	6.60537	6.54847	6.64193	6.6071	6.57443	6.63627	6.66177	-0.0251891	0.479983	-0.00440165	0.893106	-0.0249908	0.542962
ILMN_1652073	LOC653658	13.0806	13.1004	13.0275	13.0148	13.1423	13.0538	13.0538	13.1183	12.9968	13.0862	13.0725	13.0373	0.00417731	0.880965	0.00493061	0.908791	-0.00906141	0.823278
ILMN_1652079	LOC641846	6.62243	6.57468	6.56823	6.65237	6.52281	6.51455	6.60697	6.60142	6.6071	6.58197	6.54305	6.61104	0.00975759	0.72726	-0.0154443	0.767363	0.0264731	0.251845
ILMN_1652081	LOC644003	6.60735	6.61116	6.6453	6.59671	6.5379	6.69242	6.61288	6.56595	6.63578	6.58498	6.61411	6.60636	0.019451	0.26124	0.00718864	0.883045	0.00305256	0.897833
ILMN_1652082	ELF4	8.53321	8.60518	8.7179	8.71309	8.65351	8.70371	8.76087	8.56591	8.87262	8.65887	8.52486	8.43865	0.0779659	0.403959	0.149304	0.0887275	0.192337	0.155762
ILMN_1652085	MPHOSPH10	7.78432	8.00547	7.93625	7.94047	8.24738	8.09951	7.59631	8.02524	7.53793	7.93789	8.07503	7.8331	-0.0399948	0.697678	0.147112	0.262722	-0.228851	0.246784
ILMN_1652088	PAPOLB	6.6195	6.54486	6.54769	6.56278	6.61399	6.55691	6.60697	6.58699	6.52529	6.61301	6.59509	6.59857	-0.0315393	0.276134	-0.0243293	0.268264	-0.0291394	0.311709
ILMN_1652098	LOC388578	6.55218	6.59558	6.54615	6.63482	6.67413	6.66	6.65093	6.60895	6.6256	6.64086	6.63337	6.6157	-0.0653389	0.0193614	0.0263372	0.126958	-0.00148191	0.922468
ILMN_1652104	KRAS	6.6195	6.59993	6.57291	6.57443	6.62499	6.53906	6.54371	6.51021	6.61595	6.63046	6.54795	6.52529	0.0295488	0.442351	0.0115944	0.789046	-0.0112753	0.813128
ILMN_1652110	DDX12	6.92507	6.62584	6.69114	6.57165	6.7048	6.62828	6.67513	6.65117	6.62231	6.54988	6.69938	6.72777	0.0883417	0.452602	-0.0241003	0.738464	-0.00947188	0.876618
ILMN_1652113	LOC641989	6.67524	6.72902	6.71742	6.69277	6.89088	6.71548	6.73535	6.67959	6.70469	6.66462	6.68672	6.72579	0.0148524	0.572908	0.0740016	0.319124	0.0141668	0.587876
ILMN_1652123	HMGN1	10.665	10.6561	10.4793	10.6452	10.7078	10.6614	10.6561	10.6383	10.3796	10.7835	11.0504	10.9374	-0.323588	0.0300518	-0.252258	0.0338694	-0.365735	0.0364029
ILMN_1652128	LMBRD1	8.58926	8.57612	8.57441	8.36718	8.38569	8.45216	8.34722	8.38621	8.39277	8.37131	8.38352	8.52532	0.153217	0.0367205	-0.0250398	0.676626	-0.0513149	0.374884
ILMN_1652132	LOC649945	6.68064	6.6273	6.633	6.59671	6.58761	6.55998	6.59621	6.61926	6.58047	6.64086	6.65797	6.6157	0.00880245	0.695228	-0.0567461	0.0263776	-0.0395341	0.0765674
ILMN_1652137	PPYR1	6.66415	6.65237	6.671	6.57733	6.57468	6.84031	6.63615	6.55845	6.57733	6.55743	6.58047	6.57606	0.091189	0.000515038	0.0927854	0.353063	0.0193212	0.473428
ILMN_1652144	LOC653751	6.61534	6.70757	6.59136	6.65369	6.65273	6.59074	6.57846	6.81142	6.59695	6.59403	6.62267	6.59061	0.0356489	0.388156	0.0299448	0.265902	0.059838	0.472122
ILMN_1652147	MRPL43	6.92902	6.88404	6.88404	6.85939	6.82525	6.93019	6.83642	6.87773	6.91179	7.03941	6.88861	6.88287	-0.0379309	0.516723	-0.0653522	0.336206	-0.0616451	0.330418
ILMN_1652151	LOC644829	6.67665	6.64639	6.65117	6.6658	6.59472	6.61276	6.64049	6.6489	6.59236	6.71788	6.66652	6.6632	-0.0244596	0.289236	-0.0581031	0.104109	-0.0552812	0.091226
ILMN_1652155	DHX9	6.55538	6.65976	6.68064	6.55959	6.60439	6.62718	6.75439	6.58699	6.64458	6.6029	6.57291	6.66474	0.0184078	0.716665	-0.0164666	0.649179	0.0484674	0.435994
ILMN_1652160	LRBA	7.1708	7.42255	7.13535	7.14025	7.11049	7.22158	7.15903	7.30714	7.17047	7.08103	7.30175	7.03227	0.104554	0.442038	0.0190944	0.841148	0.073862	0.4828
ILMN_1652161	PNKD	6.7133	6.76922	6.66947	6.61705	6.75794	6.7626	6.63046	6.75361	6.79178	6.76105	6.66794	6.75573	-0.0109087	0.80685	-0.0157068	0.79479	-0.00295663	0.961307
ILMN_1652163	DVL2	7.94583	8.05205	8.14877	7.93289	7.95454	7.81947	8.19849	8.05139	7.96998	7.96536	7.98664	7.88863	0.102007	0.195633	-0.0445762	0.434589	0.12641	0.159216
ILMN_1652164	LOC729196	6.71981	6.69079	6.6538	6.57013	6.69196	6.62828	6.65833	6.65261	6.69625	6.72062	6.61116	6.64794	0.0282291	0.492414	-0.0297841	0.565929	0.00915622	0.806285
ILMN_1652166	GUCY1B2	6.55218	6.74937	6.57443	6.6563	6.58624	6.53011	6.61411	6.55845	6.53777	6.68041	6.65213	6.63506	-0.0305409	0.65685	-0.0649831	0.169486	-0.0857595	0.0312558
ILMN_1652170	LOC649159	6.58611	6.61116	6.64386	6.70273	6.78705	6.66852	6.57026	6.65261	6.66249	6.6538	6.58774	6.55845	0.0137156	0.697168	0.119442	0.0571512	0.0284557	0.522205
ILMN_1652171	CDKN2C	6.50525	6.73535	6.59906	6.629	6.64842	6.70757	6.56125	6.68064	6.73388	6.61301	6.51297	6.8158	-0.0340381	0.775077	0.0144027	0.883382	0.0113299	0.917441
ILMN_1652175	KRTAP9-8	6.58035	6.70042	6.60463	6.55487	6.64602	6.68975	6.56443	6.50849	6.67853	6.59403	6.62584	6.60476	0.020258	0.620641	0.022007	0.618351	-0.0243883	0.656852
ILMN_1652178	FLJ41733	6.63965	6.59098	6.64242	6.541	6.629	6.52855	6.65678	6.63627	6.68602	6.63941	6.63167	6.6569	-0.0183088	0.373566	-0.0764779	0.0781366	0.0170319	0.353751
ILMN_1652181	KIF2B	6.51665	6.62267	6.55231	6.63772	6.49643	6.62961	6.62462	6.56925	6.56557	6.59558	6.60241	6.56329	-0.023214	0.525319	0.000826535	0.986914	-0.000612597	0.979666
ILMN_1652185	IL4R	7.37601	7.37975	7.46928	7.38182	7.28436	7.30774	7.40595	7.37979	7.52414	7.48158	7.42953	7.46314	-0.0497331	0.218266	-0.133446	0.0157025	-0.0214549	0.671381
ILMN_1652188	KIAA1632	6.59048	6.60463	6.701	6.58649	6.69707	6.61141	6.65976	6.64602	6.63021	6.70825	6.58197	6.67853	-0.0242165	0.663046	-0.0246009	0.653134	-0.0109234	0.793615
ILMN_1652196	CTAG1A	7.99082	7.98314	8.03689	7.85111	7.9415	7.87854	8.20145	8.17947	8.25155	8.02168	8.18727	8.06219	-0.0867591	0.174311	-0.199993	0.0241057	0.120443	0.0904202
ILMN_1652198	CCM2	6.57051	6.75338	6.63155	6.58335	6.54988	6.55845	6.54513	6.61803	6.64458	6.58348	6.57153	6.62377	0.0588892	0.352539	-0.0290341	0.195915	0.00965181	0.788616
ILMN_1652199	LOC642113	6.73805	6.76602	6.67923	6.74355	6.72346	6.75516	6.76293	6.70342	6.65189	6.83106	6.66652	6.7394	-0.0178916	0.757194	-0.00493679	0.923815	-0.0395807	0.528417
ILMN_1652205	LOC645785	6.64422	6.62437	6.67806	6.6658	6.60587	6.60537	6.669	6.59198	6.62096	6.68847	6.64061	6.61264	0.00164667	0.954507	-0.0215582	0.510483	-0.0199253	0.561817
ILMN_1652206	LOC642628	6.52151	6.73162	6.58511	6.65761	6.58911	6.53583	6.65093	6.53595	6.59385	6.65678	6.59509	6.56849	0.00595755	0.933894	-0.0126056	0.788208	-0.0132113	0.770167
ILMN_1652207	COX4I1	12.5517	12.5761	12.623	12.6369	12.7151	12.6531	12.5654	12.5356	12.6159	12.5322	12.7042	12.4726	0.0139539	0.85677	0.0987222	0.249858	0.00267685	0.972605
ILMN_1652209	LOC731432	6.84887	6.79064	6.9421	6.97262	6.90541	6.89959	6.99526	7.0761	7.01014	7.05903	7.0537	7.03657	-0.189235	0.0132595	-0.123897	0.00708333	-0.0226022	0.429588
ILMN_1652215	LOC644310	8.20708	8.17523	8.2297	8.13432	8.03153	8.06105	8.45964	8.39725	8.51798	8.38053	8.46421	8.46934	-0.234024	0.00204908	-0.362394	0.000989914	0.020265	0.677177
ILMN_1652218	LOC440080	6.55064	6.69382	6.51888	6.59671	6.63033	6.66852	6.61411	6.60735	6.66118	6.64398	6.69382	6.64326	-0.072572	0.267224	-0.0284984	0.345188	-0.0328037	0.240257
ILMN_1652219	C20orf112	6.79746	6.7367	6.75205	6.41651	6.72504	6.58072	6.79162	6.69671	6.68041	6.62194	6.76999	6.55845	0.111941	0.161501	-0.0760339	0.523716	0.0727865	0.366993
ILMN_1652223	WDR91	6.94215	6.95631	7.07947	6.91089	6.91617	6.93922	6.96324	6.9549	6.99687	6.94793	7.02254	6.88977	0.03923	0.536707	-0.031319	0.471154	0.0182582	0.675556
ILMN_1652230	LOC647361	13.6257	13.7374	13.604	13.65	13.6919	13.6117	13.7073	13.4813	13.6145	13.6562	13.7401	13.6293	-0.0195069	0.731977	-0.0240049	0.586102	-0.0741466	0.37056
ILMN_1652236	LOC732313	6.68777	6.60956	6.63155	6.62462	6.55256	6.6763	6.53608	6.64314	6.63021	6.58811	6.56163	6.60476	0.0581268	0.0929491	0.0329944	0.434392	0.0183096	0.637791
ILMN_1652237	CBR3	7.73693	7.69973	7.77419	7.73657	7.64762	7.64959	7.85875	7.69164	7.87204	7.91212	7.6673	7.87183	-0.0801341	0.366579	-0.139158	0.161985	-0.00961032	0.924656
ILMN_1652242	LOC643206	6.81393	6.78051	6.84062	6.74097	6.76005	6.72062	6.82112	6.81814	6.87374	6.7839	6.57291	6.83915	0.0797002	0.39112	0.00855751	0.921827	0.105677	0.272426
ILMN_1652243	FLJ32784	6.65428	6.64061	6.73026	6.77789	6.62742	6.68754	6.54074	6.81142	6.65345	6.72334	6.701	6.58911	0.00390123	0.941577	0.0264673	0.683393	-0.00261498	0.97792
ILMN_1652244	POPDC3	7.52986	7.44623	7.4396	7.46402	7.41182	7.41439	7.45941	7.48953	7.36864	7.50125	7.73888	7.58892	-0.137787	0.140909	-0.179609	0.0657402	-0.170491	0.095072
ILMN_1652246	KIAA0363	6.65547	6.61815	6.59422	6.61852	6.61546	6.6658	6.63482	6.54525	6.61153	6.68041	6.64783	6.57291	-0.0111021	0.77601	-0.000452936	0.990499	-0.0365149	0.429879
ILMN_1652248	LOC653319	6.72754	6.53207	6.66947	6.61399	6.61681	6.6256	6.59497	6.61386	6.55359	6.71078	6.61411	6.60808	-0.0012959	0.985458	-0.0255255	0.487986	-0.0568503	0.206375
ILMN_1652249	PPP2R4	6.59993	6.64938	6.57291	6.69996	6.64842	6.7459	6.64794	6.6376	6.64902	6.61301	6.62584	6.61104	-0.00921902	0.707416	0.0814679	0.0461695	0.0282264	0.00873715
ILMN_1652254	LOC643125	6.6195	6.64639	6.67383	6.63482	6.57745	6.57013	6.62462	6.63494	6.63458	6.55296	6.73252	6.6632	-0.00298695	0.958985	-0.0554252	0.379408	-0.0181787	0.746096
ILMN_1652259	LOC644311	6.7033	6.61693	6.64242	6.62145	6.66474	6.54962	6.65535	6.67665	6.61766	6.6594	6.72823	6.56696	0.00268976	0.96216	-0.0395926	0.529161	-0.00163817	0.975335
ILMN_1652276	MAGEA3	7.92691	8.12165	8.10629	7.97686	7.84691	7.96551	8.14871	7.99953	8.07808	8.15319	8.13293	8.11697	-0.0827467	0.261742	-0.204602	0.00881306	-0.058922	0.25463
ILMN_1652277	SECTM1	6.85914	6.82376	6.77658	6.74579	6.79042	6.70895	6.76005	6.74736	6.75516	6.80209	6.60697	6.70607	0.114782	0.133939	0.0433434	0.516947	0.0491473	0.433068
ILMN_1652280	FBXO32	6.67112	6.76349	6.72663	6.77658	6.8308	6.76531	6.82757	6.78923	6.83053	6.76238	6.84208	6.86954	-0.104253	0.0675082	-0.0337729	0.423963	-0.00888888	0.81089
ILMN_1652284	PRM3	6.78641	6.66829	6.58986	6.61558	6.68064	6.60537	6.49722	6.68602	6.64025	6.67054	6.66225	6.68485	0.00897024	0.883591	-0.0386815	0.189219	-0.0647158	0.321435
ILMN_1652287	NOG	6.6658	6.65535	6.67242	6.58035	6.62608	6.72209	6.53167	6.63203	6.63021	6.67883	6.63167	6.59223	0.0302822	0.301031	0.00859955	0.868401	-0.0362698	0.431903
ILMN_1652291	EVX2	6.56874	6.59558	6.6453	6.70722	6.64842	6.55256	6.62328	6.55845	6.61301	6.66888	6.62875	6.57443	-0.0208133	0.587999	0.0120467	0.830492	-0.0257755	0.490219
ILMN_1652297	LOC642468	6.67383	6.68345	6.71467	6.65093	6.54074	6.59683	6.71307	6.62231	6.63735	6.55296	6.52998	6.62377	0.121749	0.0167774	0.0272642	0.556356	0.0886752	0.0899086
ILMN_1652300	ZNF507	6.96198	7.06365	6.93539	6.95631	6.94623	6.96371	6.98838	6.98009	6.75684	6.91497	6.94087	7.04368	0.0205001	0.73024	-0.0110945	0.793389	-0.0580735	0.533893
ILMN_1652306	MEGF10	6.70192	6.58811	6.61815	6.75939	6.65547	6.64206	6.72663	6.5811	6.59993	6.73015	6.59509	6.59708	-0.0047121	0.937192	0.0448656	0.482871	-0.00488667	0.942732
ILMN_1652309	TTC8	7.24065	7.21014	7.21298	7.23582	7.18665	7.23088	7.1658	7.30486	7.14462	7.24252	7.15133	7.13944	0.0434939	0.269783	0.0400177	0.330011	0.0273309	0.67178
ILMN_1652313	RNF215	6.88911	6.88506	6.97652	6.95263	6.85022	6.9022	6.94062	6.79475	6.96294	6.86264	6.86748	6.90115	0.0398052	0.284012	0.0245946	0.484343	0.0223494	0.700772
ILMN_1652314	SPAG1	6.541	6.53044	6.58348	6.629	6.63747	6.59074	6.63046	6.54074	6.541	6.57443	6.54923	6.64169	-0.0368108	0.314166	0.0306182	0.380842	-0.0177197	0.685481
ILMN_1652319	LOC642528	6.69903	6.56049	6.67383	6.61705	6.71238	6.67337	6.60562	6.62231	6.62096	6.63796	6.67242	6.78248	-0.053171	0.432217	-0.0300174	0.592102	-0.0813231	0.137641
ILMN_1652331	KCTD5	6.63216	6.79345	6.8522	6.73252	6.9013	6.69242	6.77603	6.82037	6.67112	6.7385	6.71947	6.82175	-0.000638464	0.993431	0.0155088	0.83843	-0.00406633	0.943864
ILMN_1652333	FN3KRP	8.64092	8.51411	8.59178	9.07827	8.85922	8.73104	9.03457	8.79333	9.07447	8.79791	8.92876	8.97968	-0.319846	0.00815234	-0.0126085	0.917922	0.0653398	0.56091
ILMN_1652342	LOC649143	6.59173	6.60636	6.46779	6.68626	6.57606	6.61411	6.70584	6.5643	6.66533	6.71502	6.56659	6.65093	-0.0888836	0.22176	-0.0187007	0.745542	0.000980368	0.987778
ILMN_1652343	LOC652735	6.57222	6.56366	6.72152	6.54255	6.6087	6.51455	6.5468	6.60327	6.64458	6.58811	6.57884	6.52972	0.0535772	0.380128	-0.0102903	0.772584	0.0326587	0.386572
ILMN_1652348	C4orf50	6.75695	6.67383	6.64386	6.58185	6.69196	6.64206	6.67513	6.59584	6.72924	6.67618	6.66071	6.70307	0.0115592	0.764345	-0.0413621	0.29253	-0.0132512	0.76088
ILMN_1652357	PDHX	8.4096	8.32599	8.43755	8.31047	8.33183	8.42058	8.13339	8.25361	8.05947	8.21143	8.27785	8.27505	0.136273	0.0269341	0.09952	0.0680103	-0.105952	0.155242
ILMN_1652365	LOC127602	6.62682	6.54319	6.64386	6.64494	6.516	6.55109	6.49563	6.50678	6.59086	6.55155	6.55538	6.54577	0.0537215	0.160551	0.0197786	0.635302	-0.0198114	0.547468
ILMN_1652366	NLRP7	6.72754	6.60179	6.75472	6.64206	6.68333	6.7063	6.69405	6.69834	6.68864	6.6594	6.63337	6.63675	0.0515104	0.341941	0.0340571	0.171886	0.0505026	0.0042718
ILMN_1652368	LOC647247	6.61043	6.77931	6.5366	6.50863	6.66616	6.62828	6.47645	6.58699	6.53945	6.6453	6.60117	6.59223	0.0292131	0.712003	-0.0118776	0.824683	-0.0786056	0.0941983
ILMN_1652369	ERCC1	6.99347	6.99036	6.92695	6.96693	6.9962	6.97194	7.12818	7.1723	7.12706	7.21985	7.20636	7.24411	-0.253179	0.000481372	-0.245084	6.74373e-05	-0.0809291	0.0120224
ILMN_1652371	KIAA1324L	7.55783	7.63079	7.55382	7.64309	7.61128	7.6528	7.33827	7.49295	7.40348	7.63734	7.53342	7.3907	0.06033	0.470343	0.11524	0.18756	-0.108922	0.266357
ILMN_1652376	IFNA17	6.51311	6.58348	6.63009	6.49649	6.54216	6.50081	6.51783	6.57229	6.55653	6.53011	6.58924	6.57443	0.0109682	0.789145	-0.0514375	0.0886375	-0.0157087	0.5489
ILMN_1652378	IPO7	7.02172	6.92192	6.98009	6.93422	7.02392	6.95871	7.23391	6.89194	6.81569	6.98117	6.96592	6.93147	0.015054	0.666938	0.0127642	0.697453	0.0209934	0.879017
ILMN_1652379	SUCLG2	8.5976	8.61844	8.48043	8.53336	8.47164	8.62407	8.55583	8.49849	8.20352	8.54469	8.44592	8.37865	0.109067	0.166491	0.0866049	0.256368	-0.0371401	0.771143
ILMN_1652381	SIGLEC5	6.7289	6.67923	6.55359	6.66427	6.58197	6.71033	6.6495	6.69265	6.66249	6.6538	6.64338	6.71788	-0.0177776	0.771216	-0.0194971	0.681785	-0.00347376	0.902285
ILMN_1652392	DCHS2	6.55679	6.69079	6.63155	6.72698	6.61264	6.63929	6.6465	6.54962	6.541	6.56049	6.63917	6.62377	0.0185683	0.70494	0.0518278	0.285757	-0.0287692	0.526466
ILMN_1652394	RAB2A	8.77981	8.66805	8.78789	8.87496	8.79351	8.77194	8.88585	8.92568	8.69384	8.89549	8.86053	8.92072	-0.146995	0.0257055	-0.0787721	0.0932316	-0.057122	0.481384
ILMN_1652397	TRPT1	6.56449	6.52875	6.61962	6.55487	6.44091	6.5331	6.52065	6.60142	6.56112	6.59111	6.46494	6.51482	0.04733	0.354293	-0.0139962	0.796002	0.0374391	0.437646
ILMN_1652407	ZMYND8	7.58123	7.69762	7.75282	7.75866	7.72643	7.79647	7.80029	7.96322	7.80626	7.78519	7.98381	7.82229	-0.186538	0.0781055	-0.103242	0.183322	-0.00717258	0.933706
ILMN_1652409	SPATA7	7.94927	7.89147	7.92859	8.03719	7.88553	7.88086	7.81473	7.88065	7.65791	7.80713	7.79129	7.80486	0.122017	0.00228073	0.133429	0.0609079	-0.0166685	0.813732
ILMN_1652412	PHKB	6.82752	6.71776	6.74097	6.85644	6.79843	6.69625	6.68345	6.8142	6.67853	6.70262	6.83884	6.79345	-0.0162175	0.771331	0.0054044	0.93432	-0.0529087	0.426336
ILMN_1652413	UCN2	6.67253	6.76767	6.78912	6.67418	6.65964	6.7421	6.7497	6.65964	6.71181	6.68695	6.95418	6.75428	-0.055362	0.562906	-0.106496	0.274484	-0.0914169	0.339604
ILMN_1652417	DC36	6.79345	6.75338	6.72277	6.8209	6.8244	6.83622	6.87956	6.74097	6.74825	6.70262	6.74478	6.70146	0.0402482	0.181841	0.110886	0.00177971	0.0733088	0.19561
ILMN_1652424	OR1S1	6.6382	6.63167	6.73026	6.64794	6.65428	6.64206	6.74825	6.64314	6.63458	6.6632	6.63167	6.6003	0.0349894	0.393753	0.0163713	0.426104	0.0435998	0.345547
ILMN_1652429	CXorf30	6.59659	6.52581	6.55666	6.58486	6.56443	6.65464	6.6465	6.65678	6.52045	6.59248	6.64639	6.60956	-0.0564573	0.0950839	-0.0148356	0.663211	-0.00822986	0.868474
ILMN_1652430	LOC642268	6.53634	6.56861	6.55959	6.61116	6.61681	6.59534	6.61141	6.59447	6.60587	6.60587	6.56329	6.64326	-0.0492895	0.120186	0.00363167	0.886948	-0.000224148	0.992887
ILMN_1652431	CA1	6.57222	6.57316	6.59906	6.65892	6.55538	6.54371	6.56443	6.53167	6.56557	6.63796	6.51297	6.56329	0.0100739	0.800767	0.0145933	0.791213	-0.0175199	0.668493
ILMN_1652434	MTHFD2L	7.30289	7.22504	7.19612	7.51525	7.37843	7.45826	7.1604	7.41495	7.05619	7.23859	7.27363	7.14462	0.0223994	0.677342	0.231692	0.013808	-0.00843499	0.944228
ILMN_1652436	LOC646029	6.59659	6.67383	6.55666	6.541	6.53323	6.60685	6.57468	6.59993	6.51744	6.51067	6.61705	6.63675	0.0208654	0.70936	-0.0277985	0.575005	-0.0241438	0.628439
ILMN_1652439	KRTAP3-1	6.72641	6.70757	6.74512	6.71399	6.66106	6.73501	6.70135	6.68474	6.77032	6.78171	6.69242	6.76116	-0.0187328	0.554719	-0.0417453	0.296817	-0.0262977	0.52306
ILMN_1652445	RAC1	6.82334	6.72323	6.8193	6.68766	6.75093	6.6763	6.81697	6.79843	6.85095	6.85603	6.85769	6.76249	-0.0367772	0.463256	-0.120438	0.0369235	-0.0032864	0.929742
ILMN_1652450	LOC647509	6.63518	6.62875	6.56823	6.65761	6.63337	6.61852	6.52529	6.62791	6.59844	6.6594	6.68835	6.61104	-0.0422067	0.245474	-0.0164292	0.550967	-0.069049	0.142855
ILMN_1652456	TMEM98	6.63118	6.63627	6.75706	6.65237	6.61264	6.60389	6.64794	6.64602	6.59385	6.65093	6.56036	6.7133	0.0333067	0.611416	-0.0185652	0.712071	-0.0122604	0.810243
ILMN_1652459	LOC654161	7.13671	7.17422	7.25155	7.12569	7.094	6.91943	7.26781	7.17516	7.2753	7.23526	6.98734	7.15709	0.0609274	0.491822	-0.08019	0.456155	0.112862	0.2309
ILMN_1652461	PARD3B	6.61043	6.67665	6.57291	6.53945	6.60587	6.50678	6.629	6.62645	6.71027	6.55896	6.61116	6.64326	0.0155396	0.710849	-0.0537622	0.231289	0.0507803	0.240707
ILMN_1652464	TUBA3E	7.11937	6.97499	7.15281	6.96381	6.95302	7.06041	7.04223	7.13935	7.31226	7.08846	7.00726	7.27986	-0.0428051	0.683321	-0.13278	0.204683	0.0394223	0.744748
ILMN_1652465	SLC26A4	6.68064	6.67242	6.52608	6.53051	6.60142	6.74859	6.5468	6.72436	6.58924	6.6465	6.64783	6.62084	-0.0120113	0.825268	-0.0115529	0.867211	-0.0182581	0.753378
ILMN_1652466	LOC644366	6.44706	6.66415	6.63953	6.64061	6.55845	6.60129	6.57657	6.64998	6.6256	6.53011	6.57449	6.52359	0.0408483	0.593222	0.0573848	0.115379	0.0746507	0.0498766
ILMN_1652469	LOC648302	6.62377	6.5821	6.54923	6.6658	6.64974	6.67159	6.67912	6.7149	6.59236	6.72743	6.61705	6.65237	-0.080583	0.107969	-0.00324181	0.926901	-0.00349316	0.946386
ILMN_1652472	BRAF	6.71055	6.71639	6.80992	6.76238	6.72015	6.66852	6.62035	6.68602	6.54255	6.64806	6.75244	6.73512	0.0337444	0.500397	0.00514317	0.908846	-0.0955664	0.143175
ILMN_1652486	THAP7	6.93667	7.10606	7.08404	6.97262	7.2332	6.96908	7.03767	7.24378	7.16685	7.10984	7.02714	7.14685	-0.0523567	0.458427	-0.0363124	0.719908	0.0548226	0.475957
ILMN_1652487	RIOK1	6.9105	6.98942	6.96073	7.01367	6.91721	7.00838	7.03195	6.93618	6.87057	6.9069	6.92665	6.86717	0.0533059	0.139329	0.0795112	0.0909001	0.0459923	0.409836
ILMN_1652488	LOC644883	6.59993	6.64206	6.6538	6.60439	6.54216	6.57468	6.56443	6.63203	6.57733	6.629	6.671	6.63675	-0.0136557	0.547947	-0.0718443	0.0314516	-0.0543226	0.09009
ILMN_1652490	MANSC1	6.92231	6.94351	6.92469	6.88693	6.95505	6.87875	6.86176	6.88404	6.90716	6.87875	7.0416	6.91458	-0.0148075	0.781259	-0.0380641	0.527023	-0.0606548	0.301028
ILMN_1652494	FAM139A	6.58285	6.68064	6.66273	6.63033	6.59472	6.65874	6.62328	6.5036	6.61913	6.58649	6.64639	6.60636	0.0289953	0.45207	0.0148526	0.592356	-0.0310728	0.509861
ILMN_1652505	APEX2	9.05168	9.06125	9.22238	8.92944	9.14185	8.9779	9.19469	9.41493	9.26768	9.02472	9.1032	9.02387	0.0611701	0.374831	-0.0342022	0.648162	0.241834	0.0258314
ILMN_1652507	LOC646870	6.67253	6.71776	6.60327	6.5982	6.57165	6.59993	6.59919	6.6206	6.61913	6.71364	6.60845	6.68969	-0.00607317	0.901467	-0.08067	0.0715433	-0.0576213	0.151604
ILMN_1652512	C2CD2	7.41224	7.49933	7.40879	7.5633	7.38145	7.42182	7.37224	7.35304	7.44188	7.48201	7.53947	7.36079	-0.0206382	0.749869	-0.00523417	0.948563	-0.0717016	0.292326
ILMN_1652521	MTMR9	7.88148	7.80634	7.5883	7.92745	7.78997	7.81783	8.04576	7.73493	7.72542	7.75001	7.76578	7.76212	-0.000596584	0.994918	0.0857791	0.112052	0.0760631	0.510202
ILMN_1652525	FAM125B	6.69775	6.69903	6.74097	6.61264	6.64458	6.6613	6.6736	6.66379	6.64602	6.66734	6.64061	6.61913	0.0702227	0.0242595	-0.00285523	0.893146	0.0187762	0.308616
ILMN_1652527	LOC644808	6.59048	6.76767	6.57582	6.65511	6.6471	6.64614	6.63615	6.69834	6.63578	6.65237	6.63482	6.60956	0.0124073	0.853227	0.0172019	0.248429	0.0245051	0.368879
ILMN_1652533	DKFZp434K191	8.05482	8.15671	7.98623	7.92559	7.89472	8.09375	8.16453	7.88387	8.02192	8.08638	7.85805	8.15546	0.0326264	0.766415	-0.0619413	0.600527	-0.00985578	0.938993
ILMN_1652540	RELL2	6.95938	6.91706	6.99639	6.85758	7.0281	7.0094	6.98838	6.95683	7.04904	6.93412	6.95297	6.93147	0.0180923	0.491142	0.0255089	0.663635	0.058564	0.103697
ILMN_1652549	DTNA	6.91458	6.96381	6.89668	6.9083	6.9962	6.86275	6.90661	6.94087	6.9617	7.00081	6.95418	6.96592	-0.048619	0.117885	-0.051223	0.285597	-0.0372469	0.155355
ILMN_1652550	LOC647681	6.62536	6.71639	6.6382	6.65511	6.64193	6.67759	6.71776	6.57971	6.69185	6.62462	6.65511	6.58699	0.0377416	0.3367	0.0359723	0.181754	0.0408653	0.431122
ILMN_1652574	LRRC4B	6.60142	6.62121	6.57582	6.60587	6.51823	6.62718	6.64193	6.56741	6.67112	6.73139	6.57449	6.58072	-0.0293893	0.608441	-0.0451111	0.501791	-0.00204865	0.974343
ILMN_1652577	USP32	6.59341	6.64206	6.80144	6.69869	6.63747	6.62401	6.629	6.71124	6.60439	6.71364	6.66522	6.59223	0.0219419	0.775923	-0.0036378	0.935308	-0.00882163	0.862677
ILMN_1652578	TSHB	6.53128	6.6538	6.53543	6.66023	6.54525	6.55998	6.5629	6.55704	6.52359	6.62608	6.5331	6.54409	0.00574622	0.913592	0.0207255	0.679077	-0.0199123	0.565016
ILMN_1652580	POLD1	7.88503	7.78165	7.81473	7.75029	7.78919	7.77009	7.87599	7.74763	7.96071	7.77887	7.85527	7.91968	-0.0241342	0.659798	-0.0814148	0.126052	0.0101717	0.897468
ILMN_1652594	ACTR5	7.30966	7.36108	7.27638	7.28929	7.29593	7.29174	7.12161	7.18504	7.25169	7.19411	7.23192	7.18887	0.11074	0.0169922	0.0873532	0.00310366	-0.0188527	0.661434
ILMN_1652602	C11orf35	6.64098	6.66285	6.66273	6.64494	6.64314	6.68064	6.60401	6.66379	6.79178	6.75026	6.62875	6.7394	-0.050622	0.26918	-0.0498988	0.287381	-0.0196124	0.786242
ILMN_1652604	GGT1	6.78269	6.6273	6.70895	6.69996	6.67665	6.69114	6.71021	6.67524	6.65666	6.76238	6.63917	6.74713	-0.00991496	0.875353	-0.0269734	0.530921	-0.0355206	0.443695
ILMN_1652609	RGNEF	6.63675	6.69509	6.69544	6.69155	6.76916	6.56303	6.61411	6.66474	6.63735	6.65523	6.59659	6.60179	0.0578928	0.0990671	0.0567119	0.418651	0.0208654	0.429745
ILMN_1652611	LOC642538	6.54731	6.56366	6.60463	6.66994	6.64193	6.57165	6.74097	6.67524	6.59385	6.78291	6.60117	6.63021	-0.099561	0.166169	-0.043589	0.530151	-0.00140894	0.985039
ILMN_1652628	LOC375295	6.66285	6.54022	6.64386	6.61852	6.66379	6.63216	6.59497	6.70342	6.5486	6.59403	6.68672	6.56849	-0.000771575	0.98895	0.0217457	0.600896	-0.00075205	0.990319
ILMN_1652631	GLIPR2	7.27739	7.41253	7.26705	7.30227	7.31369	7.29174	7.21969	7.2751	7.4265	7.34703	7.38856	7.31721	-0.0319464	0.566682	-0.0483644	0.0890872	-0.0438354	0.538078
ILMN_1652638	LRRC58	7.25537	7.28814	7.13151	7.40992	7.3872	7.46402	7.28485	7.32273	7.06629	7.27986	7.24746	7.25155	-0.0346176	0.51703	0.160759	0.00298823	-0.0350005	0.686379
ILMN_1652639	LOC652173	6.59509	6.6538	6.63009	6.69718	6.6471	6.72323	6.69996	6.71227	6.65345	6.73015	6.71159	6.62084	-0.061197	0.181044	0.00164288	0.969579	0.00103128	0.979769
ILMN_1652646	LOC441196	6.65702	6.5821	6.61681	6.6563	6.57884	6.50856	6.61141	6.61386	6.54255	6.58961	6.59659	6.62706	0.0142256	0.592767	-0.0231836	0.627558	-0.0151448	0.59215
ILMN_1652647	INPP4A	6.77996	6.73535	6.73026	6.79918	6.77789	6.77032	6.73805	6.77756	6.75361	6.66734	6.74848	6.688	0.0472514	0.178753	0.0811891	0.0347456	0.0551359	0.109924
ILMN_1652649	LOC643722	6.69903	6.66285	6.70377	6.83359	6.66249	6.68205	6.52065	6.81003	6.69457	6.62462	6.73252	6.63675	0.0239144	0.548005	0.0614072	0.391225	0.01045	0.913886
ILMN_1652650	SH3KBP1	6.53945	6.67524	6.73805	6.76083	6.64458	6.68064	6.6495	6.6489	6.61448	6.72334	6.66522	6.63844	-0.0247512	0.71757	0.0196856	0.667484	-0.0380404	0.240247
ILMN_1652660	LOC647357	6.76867	6.71204	6.72425	6.78499	6.71776	6.76658	6.84522	6.82037	6.80295	6.85975	6.82757	6.86254	-0.114966	0.00500283	-0.0935126	0.0152355	-0.0271085	0.178248
ILMN_1652662	GRB10	6.83485	6.85954	6.76503	6.77658	6.76503	6.90101	6.80606	6.76293	6.67853	6.77647	6.73128	6.87487	0.0256024	0.64184	0.0199986	0.758557	-0.0450322	0.470526
ILMN_1652666	LOC647049	6.51862	6.58949	6.43472	6.54583	6.59061	6.57757	6.60993	6.60735	6.64025	6.52045	6.74848	6.59546	-0.107186	0.254523	-0.0501254	0.504303	-0.00228799	0.974742
ILMN_1652670	PRAMEF1	6.54255	6.57619	6.54615	6.54255	6.55998	6.57606	6.62608	6.59447	6.58498	6.66888	6.58348	6.54756	-0.0450118	0.296548	-0.0404447	0.338739	0.00187134	0.963147
ILMN_1652674	LLGL2	6.61386	6.52229	6.70377	6.66285	6.64193	6.47779	6.76724	6.54808	6.5486	6.58498	6.60697	6.56849	0.0264898	0.646842	0.00737507	0.907433	0.034488	0.664656
ILMN_1652677	FAM89A	6.87456	6.84579	6.89668	6.84564	6.85954	6.87057	6.80284	6.95403	6.80456	6.77263	6.76735	6.79616	0.0936299	0.00551536	0.0798701	0.00220027	0.0750966	0.214078
ILMN_1652680	LOC652616	6.57222	6.5821	6.59422	6.59968	6.53505	6.65345	6.58911	6.63349	6.54255	6.54255	6.6055	6.67253	-0.0240113	0.562423	-0.0108012	0.841999	-0.018477	0.707281
ILMN_1652685	LOC642595	6.62377	6.69382	6.70238	6.65237	6.63892	6.66	6.63482	6.76171	6.66988	6.69996	6.6055	6.66474	0.0165908	0.678226	-0.00630455	0.83429	0.0320715	0.530883
ILMN_1652687	LOC440104	6.61681	6.64639	6.633	6.6029	6.64055	6.59683	6.47145	6.59447	6.6071	6.48372	6.66522	6.66177	0.0284973	0.662366	0.00985932	0.880353	-0.0458989	0.568273
ILMN_1652689	LOC202134	6.71981	6.75772	6.67923	6.69277	6.80295	6.77384	6.76005	6.78084	6.78095	6.75828	6.72527	6.70745	-0.0114133	0.695444	0.0261845	0.509177	0.0436105	0.0567357
ILMN_1652693	SHH	6.59048	6.68064	6.66568	6.55167	6.72015	6.61141	6.5977	6.51921	6.54551	6.55589	6.5281	6.7149	0.0459721	0.515573	0.0281146	0.73112	-0.0454918	0.50763
ILMN_1652694	FAM131B	6.55845	6.7332	6.62255	6.62596	6.62096	6.65726	6.66273	6.54384	6.56849	6.63349	6.6376	6.60179	0.0137761	0.805177	0.0104361	0.550545	-0.0326065	0.438712
ILMN_1652700	LOC647102	6.76194	6.71639	6.6569	6.63191	6.70883	6.68474	6.78051	6.71124	6.78901	6.77373	6.63482	6.7117	0.00499263	0.925838	-0.0315894	0.531286	0.0535043	0.319633
ILMN_1652701	FLJ20972	6.6483	6.59857	6.68672	6.62462	6.69068	6.57468	6.57026	6.73726	6.59695	6.55743	6.6055	6.62084	0.0499389	0.192249	0.0354063	0.411413	0.0402345	0.506492
ILMN_1652711	LOC648815	6.67818	6.6435	6.59136	6.73766	6.66474	6.65571	6.66598	6.60593	6.66664	6.74097	6.61705	6.57443	-0.00647119	0.913513	0.0418845	0.498124	0.00203028	0.971733
ILMN_1652715	C10orf111	6.62243	6.52725	6.54299	6.56125	6.52124	6.55845	6.59919	6.57229	6.59385	6.62742	6.64206	6.55538	-0.0440633	0.330499	-0.0613078	0.108185	-0.0198461	0.517886
ILMN_1652716	THEX1	7.55331	7.44537	7.57433	7.53796	7.62876	7.54438	7.36334	7.55684	7.1118	7.52836	7.46388	7.55229	0.00949466	0.852492	0.0555209	0.231646	-0.170852	0.263728
ILMN_1652719	TMCO5A	6.75584	6.75472	6.92231	6.75561	6.8263	6.7133	6.89789	6.76426	6.89456	6.80047	6.71536	6.82895	0.0293602	0.676279	-0.0165224	0.745202	0.0706394	0.273355
ILMN_1652721	LOC648758	6.72095	6.66415	6.78488	6.87977	6.80165	6.74725	6.77142	6.66474	6.79746	6.6594	6.85769	7.03227	-0.126459	0.326568	-0.0402293	0.74278	-0.105246	0.412281
ILMN_1652722	C14orf2	10.2372	10.2854	10.3833	10.1953	10.2475	10.2285	10.5593	10.3944	10.629	10.364	10.3488	10.4666	-0.0911827	0.183022	-0.169341	0.0133209	0.134441	0.163045
ILMN_1652727	GLT8D1	6.53479	6.60796	6.67806	6.51927	6.61129	6.52222	6.65535	6.66746	6.61766	6.60735	6.59223	6.58699	0.0114162	0.798342	-0.0445948	0.221261	0.0513043	0.0338873
ILMN_1652729	ANK2	6.70469	6.66285	6.72277	6.65892	6.69068	6.65034	6.69834	6.69671	6.7255	6.78673	6.61705	6.68345	0.00102366	0.985366	-0.0290982	0.597905	0.0111059	0.835875
ILMN_1652732	HTR7	6.7595	6.57013	6.66852	6.64338	6.70238	6.67159	6.66746	6.69671	6.74959	6.70434	6.6273	6.68969	-0.00772459	0.903076	-0.0013253	0.965887	0.0308136	0.412251
ILMN_1652735	RFXAP	7.06736	7.07321	7.04669	7.07725	7.18772	7.21455	7.01459	7.08696	7.02346	7.12963	7.08797	7.19603	-0.0754586	0.0808485	0.0219637	0.697126	-0.096206	0.0684944
ILMN_1652736	RPS6KA3	6.84887	6.95447	6.91538	6.83673	6.86769	6.97013	6.81291	6.85985	6.74266	6.81995	6.80778	6.74097	0.116671	0.0415221	0.101951	0.0968702	0.0155767	0.729416
ILMN_1652737	LOC646871	6.56874	6.60636	6.6453	6.66285	6.61681	6.68333	6.60697	6.6307	6.55959	6.60883	6.56036	6.60636	0.0149505	0.61113	0.0624794	0.0683076	0.00723941	0.795839
ILMN_1652740	LOC389786	6.68649	6.68205	6.6852	6.65093	6.54377	6.63506	6.65678	6.64602	6.75104	6.63651	6.63917	6.6173	0.0535858	0.00157757	-0.0210708	0.570024	0.0536237	0.190546
ILMN_1652745	LOC642257	6.66285	6.62121	6.68672	6.54435	6.62231	6.53167	6.52229	6.68998	6.61005	6.75026	6.63337	6.70895	-0.0406007	0.358983	-0.131415	0.0416539	-0.090085	0.203348
ILMN_1652747	LOC644631	6.72095	6.58811	6.62414	6.63627	6.56303	6.69486	6.84292	6.68602	6.85546	6.70262	6.70895	6.72289	-0.0670833	0.16976	-0.080097	0.106625	0.0833162	0.203302
ILMN_1652749	ERF	9.20785	9.26399	9.19719	9.18871	9.19284	9.03284	9.5475	9.59525	9.65624	9.44403	9.30338	9.36167	-0.146684	0.0327279	-0.23156	0.0254401	0.229972	0.0111322
ILMN_1652753	PAAF1	9.08016	9.09412	9.19362	9.0728	9.14123	8.92257	9.15778	9.22805	9.31954	9.13143	9.17681	9.14421	-0.0281818	0.501524	-0.105285	0.185767	0.0843074	0.158731
ILMN_1652754	ZNF428	10.9584	10.7657	10.7536	10.9269	10.7063	10.7035	10.9933	10.8983	11.033	11.1264	11.0401	11.0735	-0.254101	0.0231401	-0.301146	0.0182514	-0.105152	0.0898369
ILMN_1652756	LOC643878	6.55538	6.51455	6.60463	6.61705	6.66106	6.52372	6.60845	6.54384	6.61448	6.70951	6.49203	6.59061	-0.0391955	0.595503	0.00322837	0.967636	-0.0084616	0.905336
ILMN_1652758	LOC647579	6.73388	6.56861	6.58185	6.629	6.71021	6.71181	6.62035	6.67665	6.68462	6.67337	6.66652	6.6003	-0.0186143	0.763988	0.0369458	0.361834	0.0138147	0.677506
ILMN_1652761	LOC653203	6.69219	6.82175	6.56214	6.58185	6.64193	6.61852	6.67207	6.66106	6.56112	6.6029	6.59968	6.57443	0.0996901	0.257093	0.0217676	0.330428	0.0390821	0.343681
ILMN_1652762	HIC2	7.67669	7.84775	7.73258	7.6591	7.4741	7.53736	7.8046	7.55981	7.87028	7.61816	7.59455	7.545	0.166434	0.0384709	-0.0290527	0.645011	0.158989	0.176175
ILMN_1652763	LOC389203	6.9759	6.98052	7.22464	7.03493	6.97947	6.99409	7.11724	7.24613	7.21514	7.14437	7.14917	7.22134	-0.111276	0.26462	-0.168799	0.00485988	0.0212087	0.669602
ILMN_1652768	LOC440589	13.2036	13.2535	13.3917	13.4477	13.3426	13.3875	13.4072	13.2882	13.3098	13.2327	13.532	13.4951	-0.136993	0.279954	-0.0273257	0.796206	-0.084862	0.448365
ILMN_1652777	CDC42EP2	7.42712	7.5182	7.39148	7.53383	7.45034	7.49963	7.60045	7.34156	7.68367	7.47945	7.53799	7.62023	-0.10029	0.145563	-0.0512901	0.340811	-0.00399524	0.972964
ILMN_1652780	TMOD2	6.60142	6.54319	6.7367	6.65892	6.55538	6.63095	6.54229	6.61386	6.68864	6.6594	6.54795	6.55704	0.0389698	0.594888	0.026951	0.598957	0.0268005	0.653478
ILMN_1652784	MUCDHL	6.55998	6.60327	6.6671	6.5643	6.63892	6.59248	6.59211	6.5811	6.67253	6.67483	6.58486	6.62377	-0.0177039	0.68516	-0.0292531	0.437367	-0.0125746	0.762406
ILMN_1652786	LOC338805	6.6658	6.69242	6.62864	6.69155	6.61962	6.55256	6.57468	6.67136	6.67853	6.68695	6.57013	6.62231	0.0358242	0.404987	-0.00521823	0.925549	0.01506	0.767387
ILMN_1652787	PIK3AP1	6.71981	6.75071	6.68356	6.71662	6.73535	6.80295	6.67207	6.71353	6.75828	6.72192	6.76094	6.75573	-0.0281685	0.286715	0.00544145	0.859965	-0.0315696	0.318549
ILMN_1652790	CLK1	7.1356	7.11473	7.02557	7.21644	7.20265	7.27693	7.29528	7.26428	7.2174	7.23411	7.4453	7.33651	-0.246672	0.0240189	-0.106639	0.176752	-0.0796573	0.287868
ILMN_1652797	FAM174B	6.59993	6.61264	6.59906	6.67277	6.60005	6.63361	6.6157	6.62791	6.52842	6.60439	6.65511	6.62084	-0.0229036	0.215301	0.00869813	0.752804	-0.036103	0.357002
ILMN_1652799	LOC441873	6.68345	6.71204	6.60932	6.53207	6.58473	6.59683	6.63615	6.66622	6.63458	6.66189	6.64061	6.5841	0.0393991	0.36303	-0.0576588	0.132256	0.0167781	0.544874
ILMN_1652806	ATP5J	8.69009	8.71824	8.61612	8.79669	8.721	8.66843	8.84303	8.81869	8.79881	8.89902	8.9293	8.9321	-0.245326	0.00160117	-0.191436	0.00778146	-0.0999643	0.00383259
ILMN_1652807	HOXA3	6.61681	6.58811	6.60772	6.62145	6.67277	6.72323	6.67759	6.65261	6.62718	6.70262	6.67842	6.6157	-0.0613656	0.0874306	0.00690413	0.868637	-0.0131196	0.68158
ILMN_1652808	LOC643191	6.62682	6.67665	6.63155	6.55321	6.65117	6.57165	6.60845	6.62912	6.55193	6.66604	6.5446	6.53433	0.0633479	0.233506	0.0103522	0.851592	0.0148411	0.773425
ILMN_1652819	OPA3	7.08916	6.87374	6.91189	6.93034	7.04032	6.91875	6.9378	7.10649	6.99959	6.93539	6.96927	7.0009	-0.0102576	0.889033	-0.00538785	0.906567	0.0461039	0.431693
ILMN_1652825	IL10RA	6.67947	6.69242	6.81334	6.59671	6.62377	6.69486	6.73535	6.71913	6.7242	6.70561	6.62127	6.64326	0.0717008	0.221441	-0.0182652	0.661234	0.0695128	0.0538821
ILMN_1652826	LRRC17	6.55845	6.64639	6.70238	6.65093	6.53323	6.60845	6.60697	6.56595	6.55193	6.7385	6.67242	6.58223	-0.0286428	0.666586	-0.0668421	0.305117	-0.0894301	0.137169
ILMN_1652837	LOC644010	6.872	6.68064	6.69114	6.66023	6.74254	6.71925	6.82303	6.80885	6.66829	6.71227	6.77285	6.88805	-0.0431261	0.62146	-0.0837155	0.21635	-0.0243336	0.750367
ILMN_1652846	PCYT2	7.54854	7.41631	7.39066	7.29665	7.23797	7.38841	7.41157	7.15969	7.465	7.37541	7.41077	7.48947	0.0266164	0.677305	-0.117543	0.100499	-0.0797972	0.469538
ILMN_1652852	GAS2	6.59173	6.65976	6.61534	6.59968	6.629	6.59534	6.58022	6.65809	6.60439	6.68041	6.68975	6.50981	-0.0043813	0.946877	-0.0186493	0.769362	-0.0124228	0.852949
ILMN_1652854	LOC653569	6.59509	6.69775	6.54151	6.58486	6.58047	6.51021	6.6736	6.462	6.62718	6.57443	6.62584	6.57443	0.019888	0.705261	-0.0330524	0.327255	-0.00396977	0.955232
ILMN_1652857	SLC15A1	6.58285	6.65833	6.6256	6.59968	6.66616	6.62828	6.63892	6.66249	6.69324	6.54988	6.57884	6.64169	0.0321235	0.408359	0.0412352	0.282615	0.0747461	0.0755291
ILMN_1652865	BAIAP2	6.71844	6.66118	6.67923	6.57884	6.67806	6.63784	6.71913	6.76078	6.64169	6.6594	6.73377	6.70146	-0.0119232	0.685594	-0.0666284	0.137616	0.0089906	0.837158
ILMN_1652866	LMX1B	6.67524	6.74232	6.70238	6.6029	6.66616	6.68975	6.65535	6.68602	6.59086	6.64086	6.60241	6.671	0.0685589	0.0693174	0.0148471	0.672923	0.00598692	0.870137
ILMN_1652871	PLSCR5	6.68777	6.69903	6.55512	6.541	6.61399	6.5541	6.57468	6.62499	6.83622	6.67742	6.67242	6.57153	0.00685229	0.911134	-0.0707592	0.160761	0.0381743	0.684253
ILMN_1652872	UBOX5	6.6613	6.67524	6.72788	6.70146	6.72652	6.58811	6.669	6.62377	6.62389	6.64398	6.66794	6.59857	0.051314	0.148517	0.0352028	0.497112	0.00205961	0.939048
ILMN_1652876	LOC392215	6.5982	6.59098	6.59757	6.61264	6.6569	6.60389	6.60562	6.45674	6.58348	6.6029	6.66225	6.56163	-0.0133444	0.672352	0.0155475	0.66667	-0.0603157	0.332875
ILMN_1652881	FLJ00312	6.52972	6.64938	6.63572	6.72981	6.64458	6.58361	6.69683	6.70342	6.67112	6.64398	6.68228	6.671	-0.060814	0.198377	-0.013089	0.780401	0.0247006	0.175876
ILMN_1652888	C8orf30A	6.7394	6.59558	6.66568	6.71662	6.65428	6.55109	6.71776	6.6307	6.7242	6.72062	6.65797	6.6664	-0.0147734	0.763808	-0.0410002	0.475355	0.00922302	0.810311
ILMN_1652890	LOC653349	6.6029	6.55896	6.58035	6.60439	6.61129	6.62011	6.57026	6.59447	6.61913	6.50453	6.60241	6.66	-0.00824093	0.86966	0.0229523	0.641232	0.00564311	0.911201
ILMN_1652906	GBGT1	6.72471	6.60463	6.61239	6.74232	6.73026	6.68858	6.67066	6.71227	6.68731	6.59558	6.74064	6.66474	-0.0197454	0.746889	0.0534017	0.300454	0.0230885	0.624439
ILMN_1652907	CDC5L	8.94132	8.86418	8.64396	9.0237	9.02243	9.06088	8.76642	8.92085	8.33154	8.90014	8.91375	8.89469	-0.0863764	0.388051	0.132807	0.000656755	-0.229924	0.262656
ILMN_1652913	EZH2	6.92902	6.79616	6.75706	6.83253	6.76138	6.7815	6.72516	6.71776	6.80295	6.76602	6.82196	6.7487	0.0485155	0.439233	0.0129092	0.694914	-0.0302725	0.436892
ILMN_1652918	RHOF	6.86037	6.86923	6.95756	6.89789	6.88201	6.88779	6.86923	7.0781	6.89037	6.93412	6.97567	6.82472	-0.0157824	0.787178	-0.0222747	0.648386	0.0343985	0.6901
ILMN_1652927	LOC641851	6.61534	6.66947	6.62414	6.60439	6.60587	6.68754	6.69532	6.5629	6.68333	6.6632	6.58197	6.65093	0.00428074	0.894608	0.000563048	0.98869	0.0151513	0.77377
ILMN_1652928	ORAI2	6.82821	6.74937	6.8358	6.73766	6.88718	6.75127	6.76856	6.8142	6.67853	6.77516	6.81051	6.74713	0.0268587	0.4634	0.0144382	0.791679	-0.0238352	0.615775
ILMN_1652929	POGZ	6.8402	6.89103	6.96927	6.93539	6.85883	6.93662	6.88688	6.85758	6.89456	6.89748	6.85572	7.02792	-0.0268743	0.696215	-0.0167608	0.786574	-0.0473661	0.422555
ILMN_1652931	LOC644672	6.75461	6.75605	6.83705	6.75093	6.62742	6.7063	6.65976	6.76944	6.87762	6.8613	6.68392	6.7117	0.0302659	0.648169	-0.0574218	0.432506	0.0166355	0.851984
ILMN_1652938	PRRG3	6.54255	6.58348	6.6483	6.49296	6.57884	6.72686	6.63482	6.64061	6.65809	6.56226	6.67242	6.66	-0.0401158	0.436848	-0.0320031	0.697845	0.0129509	0.733926
ILMN_1652939	LOC647060	6.83253	6.7033	6.60042	6.66734	6.76282	6.63929	6.76999	6.88282	6.6973	6.629	6.86748	6.73072	-0.0303112	0.768785	-0.0525801	0.539947	0.0409701	0.664595
ILMN_1652940	MGC16703	6.69775	6.71204	6.71742	6.71273	6.68205	6.6645	6.67513	6.73585	6.73241	6.7637	6.59509	6.55704	0.0704563	0.331227	0.0478112	0.503094	0.0758481	0.317608
ILMN_1652946	LOC387804	6.66285	6.65976	6.66118	6.74355	6.62096	6.70025	6.67759	6.6376	6.71181	6.68193	6.65082	6.67701	-0.00865526	0.42252	0.0183368	0.647633	0.00574934	0.81891
ILMN_1652952	RASAL2	6.64278	6.62584	6.61681	6.67701	6.66746	6.60389	6.57165	6.61668	6.59534	6.63796	6.60697	6.49042	0.05002	0.333865	0.0709999	0.231988	0.0161033	0.747906
ILMN_1652955	LOC648622	12.0076	12.0891	11.9836	12.0231	12.0387	11.991	12.065	12.0954	12.109	12.13	11.9536	12.0974	-0.0335201	0.622253	-0.0427265	0.487791	0.029523	0.624259
ILMN_1652959	ABCD2	6.60895	6.69079	6.67383	6.66285	6.69707	6.64482	6.57657	6.59857	6.66829	6.72743	6.71947	6.57153	-0.0149519	0.804356	-0.0045663	0.935432	-0.0583358	0.369511
ILMN_1652963	C1orf194	6.61681	6.57619	6.51613	6.59223	6.53011	6.57165	6.49376	6.60735	6.5714	6.57733	6.56036	6.52215	0.0164307	0.649366	0.0113842	0.666278	0.00422377	0.915247
ILMN_1652967	LOC390332	6.58749	6.54821	6.58986	6.63929	6.48016	6.65345	6.63747	6.58536	6.70883	6.58035	6.54923	6.61104	-0.00502048	0.833482	0.0107586	0.862685	0.0636822	0.186489
ILMN_1652969	ZNF479	6.74937	6.72459	6.6852	6.62596	6.72788	6.72323	6.73951	6.62912	6.73072	6.83758	6.77789	6.8263	-0.0942038	0.0227307	-0.12157	0.0327559	-0.114142	0.0458121
ILMN_1652975	DLK1	6.62682	6.68812	6.58986	6.66142	6.58335	6.57468	6.61411	6.70088	6.61766	6.65093	6.61411	6.61913	0.00687223	0.834819	-0.021575	0.510413	0.0161598	0.625412
ILMN_1652977	LOC652191	6.7033	6.60956	6.65249	6.75439	6.69196	6.77131	6.64049	6.68847	6.50459	6.81185	6.58047	6.60636	-0.0111084	0.893701	0.0729947	0.397202	-0.055044	0.580268
ILMN_1652982	LOC23117	6.62377	6.61693	6.69114	6.64938	6.68333	6.71788	6.59061	6.64314	6.67407	6.62194	6.73377	6.73365	-0.0525055	0.300063	-0.0129248	0.774565	-0.0605171	0.245569
ILMN_1652989	NUP160	8.90391	8.66805	8.7008	8.93368	8.89612	9.04122	8.50966	8.60076	8.56708	8.64441	8.54714	8.50104	0.193391	0.0852783	0.39281	0.00292558	-0.00503228	0.92457
ILMN_1652990	LOC649745	6.63518	6.67665	6.59757	6.58786	6.50664	6.5982	6.70883	6.56925	6.60439	6.59111	6.58197	6.58911	0.0490713	0.0998702	-0.0231663	0.470302	0.0400908	0.393948
ILMN_1652991	NBPF10	6.61534	6.63167	6.59584	6.7636	6.58624	6.61141	6.65976	6.71913	6.74401	6.66189	6.70227	6.62536	-0.0488915	0.116792	-0.00942425	0.882196	0.0444593	0.254371
ILMN_1652992	PRDM2	6.58035	6.62121	6.54448	6.57165	6.59323	6.6613	6.50863	6.59993	6.6029	6.6901	6.60697	6.62864	-0.0598923	0.146792	-0.0331766	0.417559	-0.0714162	0.14653
ILMN_1652996	SMG1	6.85043	6.80981	6.89426	6.8717	6.86908	6.92734	6.88079	7.04409	6.9098	7.0094	7.01718	6.97452	-0.148864	0.00578337	-0.110995	0.00860294	-0.0554752	0.346034
ILMN_1652998	HIST1H2BL	6.70469	6.66699	6.8112	6.74097	6.65273	6.69242	6.68649	6.68998	6.70042	6.65237	6.83253	6.7746	-0.0255421	0.727948	-0.0577946	0.382144	-0.0608744	0.316871
ILMN_1653001	CABLES1	7.22911	7.21507	7.31373	7.19215	7.25872	7.232	7.25741	7.18594	7.3027	7.15883	7.13535	7.08722	0.125503	0.0282597	0.100492	0.0246071	0.12155	0.0384232
ILMN_1653006	CSN1S1	6.59341	6.64783	6.66852	6.66427	6.67524	6.63095	6.67912	6.68205	6.64602	6.58197	6.59659	6.8175	-0.0287672	0.735499	-0.00853573	0.917441	0.00370725	0.963936
ILMN_1653018	LOC647447	6.55218	6.50505	6.57582	6.50863	6.51455	6.60389	6.57316	6.52058	6.55653	6.59403	6.54125	6.52685	-0.00969575	0.756105	-0.0116884	0.767668	-0.00395351	0.884954
ILMN_1653026	PLAC8	8.83222	8.94812	8.89284	9.17611	9.02172	8.97938	9.20977	9.11751	9.11203	8.80098	8.90566	8.75883	0.0692386	0.276558	0.237249	0.0327376	0.324615	0.00384235
ILMN_1653028	COL4A1	6.63518	6.64494	6.62718	6.62011	6.5541	6.64482	6.629	6.6489	6.58223	6.59857	6.69242	6.58223	0.0113626	0.759851	-0.0180616	0.700749	-0.00436224	0.917619
ILMN_1653031	LOC653766	6.60142	6.65237	6.63009	6.61399	6.58473	6.79951	6.59348	6.61668	6.65189	6.63796	6.60969	6.66794	-0.01057	0.661166	0.0275469	0.71137	-0.0178457	0.496767
ILMN_1653033	LOC644679	6.77274	6.71033	6.74803	6.75205	6.74367	6.72448	6.8522	6.66379	6.75983	6.8522	6.64338	6.69114	0.0147924	0.832954	0.0111577	0.869448	0.0297004	0.739614
ILMN_1653039	LOC642934	9.46125	9.39488	9.35218	9.2888	9.36187	9.32074	9.35054	9.31481	9.35554	9.44905	9.5116	9.52885	-0.0937269	0.0787653	-0.172693	0.0058146	-0.156201	0.0046948
ILMN_1653040	PCDHGA12	6.67818	6.63929	6.73557	6.76083	6.7497	6.69242	6.64193	6.66249	6.6901	6.61607	6.59659	6.62377	0.0722043	0.0681885	0.122177	0.00574684	0.0526965	0.0308689
ILMN_1653042	HSD3B7	6.7595	6.81248	6.77131	6.80745	6.78155	6.77263	6.82303	6.78716	6.7255	6.78673	6.83758	6.83022	-0.0370776	0.175854	-0.0309662	0.178389	-0.0396133	0.291148
ILMN_1653043	LOC649198	6.64674	6.59857	6.61681	6.64494	6.60587	6.55256	6.56722	6.63203	6.71639	6.61153	6.57594	6.66474	0.00330033	0.915959	-0.0162789	0.684127	0.0211423	0.695878
ILMN_1653047	DHX40	7.17901	7.10875	7.05786	7.01297	6.92537	7.049	7.012	7.03753	7.148	6.97937	7.09681	7.02314	0.0820988	0.169624	-0.0373266	0.498578	0.0327373	0.577063
ILMN_1653055	SOX3	6.58147	6.63337	6.58185	6.67136	6.6029	6.72323	6.58761	6.5036	6.62864	6.63941	6.64639	6.63349	-0.0408647	0.081364	0.026066	0.498302	-0.0664792	0.146695
ILMN_1653056	ATP6V0C	6.62682	6.55116	6.71742	6.61399	6.67665	6.60845	6.54371	6.5811	6.61301	6.6594	6.66794	6.70146	-0.044469	0.421884	-0.043234	0.16341	-0.0969965	0.0151257
ILMN_1653057	LOC221981	6.74501	6.57165	6.55064	6.67701	6.61962	6.65034	6.66273	6.61509	6.7149	6.59857	6.69079	6.62084	-0.0142996	0.842735	0.0122536	0.724142	0.0275059	0.529805
ILMN_1653073	OR10Q1	6.56303	6.63167	6.61534	6.55666	6.57165	6.60241	6.55819	6.56595	6.60439	6.51389	6.63021	6.58911	0.025606	0.555529	-0.000835129	0.982899	-0.0015637	0.968255
ILMN_1653077	LOC650549	6.69775	6.60179	6.63421	6.63337	6.63179	6.63929	6.62328	6.60593	6.69324	6.70434	6.76856	6.63675	-0.0586341	0.283352	-0.0684041	0.147208	-0.0624009	0.250537
ILMN_1653092	LOC643275	6.64566	6.7341	6.56963	6.67842	6.6347	6.63361	6.71776	6.65117	6.66829	6.60439	6.61852	6.61104	0.0384817	0.465044	0.0375913	0.0700696	0.0677573	0.0292388
ILMN_1653098	SLC30A4	6.85914	6.69079	6.8218	6.72062	6.72652	6.77131	6.60562	6.69532	6.73241	6.75428	6.81281	6.66177	0.0476242	0.518617	-0.00347139	0.94442	-0.0651718	0.32313
ILMN_1653102	CCDC64	6.50367	6.59409	6.62718	6.5982	6.62499	6.68064	6.63892	6.6206	6.62864	6.61478	6.56036	6.62536	-0.0251873	0.58144	0.0344432	0.336229	0.0292202	0.23319
ILMN_1653103	C20orf152	6.53945	6.60179	6.57443	6.63772	6.60587	6.65874	6.61288	6.50505	6.62096	6.56226	6.58486	6.49855	0.023331	0.500185	0.0855538	0.0465982	0.0310764	0.531492
ILMN_1653106	LOC650677	6.63518	6.50373	6.6256	6.49649	6.58197	6.49309	6.52529	6.55256	6.57001	6.54409	6.56329	6.61913	0.0126661	0.804608	-0.0516524	0.232794	-0.0262185	0.370274
ILMN_1653115	ECH1	9.77333	9.93063	9.93992	9.67997	9.92897	9.79922	9.82772	9.87783	9.82653	9.99675	10.1339	10.1012	-0.196006	0.0450216	-0.274579	0.0296509	-0.233271	0.00642665
ILMN_1653120	ST6GAL1	6.59048	6.65237	6.68064	6.69996	6.66746	6.68205	6.65678	6.6307	6.56112	6.6495	6.5509	6.57606	0.0490116	0.285541	0.0910037	0.042715	0.0240491	0.589958
ILMN_1653125	PER1	6.75584	6.65535	6.63009	6.63337	6.67042	6.57908	6.65535	6.60142	6.67112	6.73263	6.61116	6.64025	0.0190795	0.737355	-0.033726	0.497165	-0.0187191	0.680732
ILMN_1653127	HERC2P2	6.64674	6.63482	6.65249	6.78619	6.75338	6.68614	6.66438	6.65535	6.70307	6.58961	6.68672	6.65833	-0.000202991	0.994803	0.0970172	0.078144	0.0293827	0.414841
ILMN_1653129	CSTF2	9.37746	9.45485	9.30459	9.35218	9.38828	9.34452	9.36733	9.44847	9.44763	9.38249	9.31512	9.27443	0.0549573	0.363307	0.0376481	0.333709	0.097132	0.0790135
ILMN_1653133	SH3D19	7.56779	7.47026	7.54212	7.51025	7.56056	7.42785	7.3126	7.53069	7.50407	7.33823	7.55097	7.46888	0.0740299	0.340473	0.046862	0.556001	-0.00357115	0.971053
ILMN_1653134	TMEM188	7.93923	7.90817	7.749	7.9491	7.89717	8.02635	7.98017	7.94393	7.96368	7.92654	7.92119	7.94842	-0.0665858	0.325791	0.0254852	0.543607	0.030541	0.0845985
ILMN_1653142	LOC651454	6.62536	6.66947	6.61681	6.52072	6.64974	6.66852	6.60697	6.65261	6.61153	6.4852	6.64206	6.64639	0.0459987	0.453637	0.0217779	0.772799	0.0324911	0.58628
ILMN_1653143	ECD	7.31169	7.33033	7.34079	7.43909	7.30136	7.53736	7.34795	7.36384	7.22744	7.36893	7.50972	7.50265	-0.13283	0.0463259	-0.0344969	0.696814	-0.147358	0.079026
ILMN_1653146	MSH4	6.62682	6.54654	6.55359	6.67277	6.63747	6.72209	6.60104	6.62499	6.73985	6.56709	6.61705	6.58072	-0.0126418	0.692097	0.0891565	0.0360495	0.0670034	0.213692
ILMN_1653150	LOC642961	6.58749	6.56709	6.6453	6.62011	6.62096	6.62828	6.52842	6.67395	6.56709	6.5331	6.61264	6.53128	0.0409538	0.314184	0.0641105	0.0760542	0.0308134	0.579186
ILMN_1653155	KIAA1957	6.56734	6.52875	6.60624	6.54756	6.60005	6.65726	6.60993	6.52399	6.63578	6.7477	6.5181	6.56494	-0.042802	0.591723	-0.0086213	0.916107	-0.0203452	0.806539
ILMN_1653158	DPRX	6.49616	6.60463	6.57733	6.64938	6.61264	6.58072	6.57316	6.57405	6.58047	6.57884	6.59659	6.69114	-0.0628153	0.258316	-0.00794264	0.852667	-0.0462947	0.255707
ILMN_1653161	SNCG	6.56734	6.7341	6.701	6.59671	6.61546	6.55691	6.63747	6.62791	6.59534	6.66462	6.50981	6.5841	0.0813023	0.296628	0.00351552	0.945038	0.0340627	0.504329
ILMN_1653163	ZSCAN2	6.75828	6.65833	6.87885	6.79616	6.74501	6.73884	6.77449	6.81569	6.91179	6.70951	6.80681	6.6756	0.0345117	0.668921	0.0293625	0.535055	0.103351	0.14177
ILMN_1653165	AAMP	8.28412	8.13594	8.19545	8.04651	8.04712	8.07265	8.15036	8.36445	8.2849	8.14015	8.04434	8.31747	0.037851	0.698358	-0.111895	0.236752	0.0992491	0.383589
ILMN_1653166	CLEC10A	6.6382	6.71204	6.62255	6.71124	6.61546	6.53583	6.59061	6.5615	6.57896	6.6495	6.60697	6.63349	0.027611	0.413015	-0.00914343	0.869468	-0.0529613	0.0242611
ILMN_1653174	GCNT2	6.60142	6.55116	6.74367	6.60117	6.49243	6.56595	6.57165	6.54229	6.66664	6.63941	6.66225	6.64639	-0.0172698	0.780875	-0.0961688	0.0424948	-0.0558262	0.217007
ILMN_1653180	TPM4	7.29241	7.14994	7.34497	7.19563	7.23797	7.2112	7.16272	7.54166	7.22892	7.24495	7.36181	7.30796	-0.0424669	0.562512	-0.0899748	0.0666287	0.00619042	0.961851
ILMN_1653182	LOC732139	6.7595	6.71033	6.74097	6.74355	6.78051	6.72062	6.77603	6.77219	6.84668	6.79821	6.81051	6.8927	-0.0968718	0.0423681	-0.0855773	0.0677091	-0.0355055	0.406257
ILMN_1653185	LOC731196	6.63675	6.59708	6.60042	6.58185	6.669	6.77904	6.65093	6.7712	6.65345	6.68333	6.61852	6.73365	-0.0670869	0.133103	-0.00187431	0.978727	0.013356	0.809303
ILMN_1653189	GTF2I	6.44912	6.52875	6.57582	6.56125	6.55691	6.53906	6.58911	6.60895	6.64902	6.52842	6.50678	6.64482	-0.0421098	0.498272	-0.00759793	0.869533	0.0556897	0.295794
ILMN_1653193	LOC643377	6.70469	6.60636	6.565	6.53207	6.57745	6.55845	6.52842	6.52581	6.7242	6.53777	6.57013	6.59546	0.0575645	0.26695	-0.0117982	0.608471	0.025024	0.73072
ILMN_1653198	LOC643695	6.53945	6.56709	6.60624	6.53945	6.63892	6.52045	6.57468	6.5036	6.52202	6.54988	6.66947	6.6003	-0.0356255	0.420384	-0.0402765	0.469865	-0.0731166	0.146724
ILMN_1653200	SLC22A17	7.16095	7.11344	7.13535	7.08616	7.08462	7.11555	7.12586	7.01107	7.26155	7.19211	7.21901	7.11832	-0.0398971	0.29425	-0.0810363	0.0630709	-0.0436541	0.607323
ILMN_1653202	LOC643717	6.66415	6.60463	6.65117	6.61852	6.59061	6.64206	6.64794	6.59198	6.61005	6.65093	6.61264	6.63844	0.00598203	0.792743	-0.0169393	0.415359	-0.0173444	0.434223
ILMN_1653203	EFEMP2	6.98326	7.09427	6.96193	6.95631	6.91378	7.03277	7.06159	6.93029	7.03958	7.09795	6.95813	6.9898	-0.00213734	0.972813	-0.0476739	0.433455	-0.0048043	0.938652
ILMN_1653205	C8orf59	11.787	11.8403	11.5304	11.7911	11.6492	11.7272	11.8965	11.7586	11.5138	11.7761	11.7711	11.7667	-0.0520959	0.615116	-0.0488016	0.300987	-0.0483383	0.688124
ILMN_1653207	LOC441662	6.72346	6.61558	6.67242	6.60845	6.68835	6.71673	6.5629	6.68731	6.68193	6.6206	6.71799	6.78716	-0.038099	0.543732	-0.0374062	0.555261	-0.0645393	0.364269
ILMN_1653209	ZWINT	6.94841	6.89214	6.8645	6.95765	6.98828	6.85074	7.08722	7.06544	7.0074	6.8261	6.98951	6.91458	-0.00837736	0.882708	0.0221631	0.742732	0.143291	0.0535984
ILMN_1653211	ATP1B4	6.53945	6.55436	6.58035	6.57884	6.59757	6.58072	6.62462	6.54666	6.59086	6.63651	6.60241	6.62084	-0.0618707	0.0162095	-0.0342107	0.0411221	-0.0325404	0.256954
ILMN_1653220	PITPNM1	9.63373	9.45832	9.80963	9.19894	9.34557	9.55904	9.38296	9.84148	9.75376	9.56722	9.60821	9.71887	0.00246136	0.983381	-0.263584	0.0817264	0.0279694	0.858971
ILMN_1653228	C3orf22	6.85619	6.75071	6.78629	6.71124	6.74725	6.78608	6.76138	6.81814	6.84407	6.69996	6.68543	6.75573	0.0840222	0.0895539	0.0344811	0.320467	0.0941561	0.0441788
ILMN_1653240	LOC644683	6.80553	6.71639	6.68205	6.68076	6.73535	6.6671	6.73805	6.78803	6.65511	6.67054	6.66522	6.64639	0.0739423	0.120068	0.0336895	0.202052	0.0663532	0.167858
ILMN_1653251	HIST1H1B	6.59659	6.61693	6.6483	6.68888	6.51717	6.63361	6.60993	6.67277	6.66533	6.56226	6.67842	6.64326	-0.00737283	0.853856	-0.0147573	0.821264	0.0213663	0.618949
ILMN_1653263	GPRIN1	7.26732	7.3482	7.56571	7.29727	7.2556	7.39753	7.52421	7.55229	7.63734	7.61321	7.40196	7.54147	-0.12514	0.313209	-0.202082	0.0543478	0.0523999	0.499942
ILMN_1653266	DNAJB14	7.9643	7.73137	7.81889	8.00511	8.04434	8.023	7.65617	7.77053	7.58885	7.61485	7.59227	7.58392	0.241172	0.0244961	0.427133	8.18541e-06	0.0748401	0.236788
ILMN_1653267	GPR26	6.55064	6.55602	6.6569	6.56709	6.55256	6.63651	6.66438	6.59857	6.56849	6.61607	6.5181	6.62377	0.00187468	0.971012	-0.000591264	0.989628	0.0244979	0.609378
ILMN_1653274	NUDT10	6.69219	6.57896	6.63723	6.59074	6.57316	6.68064	6.61288	6.61386	6.71027	6.67742	6.5982	6.6538	-0.00701248	0.870158	-0.0282928	0.52557	0.00253176	0.95249
ILMN_1653276	LOC645276	6.73535	6.79183	6.72788	6.6658	6.67413	6.63784	6.73388	6.64602	6.6388	6.7289	6.72686	6.67853	0.0402525	0.197165	-0.0521775	0.0577327	-0.0385337	0.329183
ILMN_1653278	MUC20	6.59993	6.53207	6.51192	6.54583	6.58047	6.5615	6.52842	6.58874	6.59993	6.53011	6.6273	6.48413	0.000795301	0.988046	0.0154236	0.740099	0.0251842	0.625369
ILMN_1653282	LCE2A	6.55998	6.67806	6.49203	6.5643	6.61546	6.57908	6.70135	6.60593	6.64314	6.57443	6.69938	6.60327	-0.0490027	0.500176	-0.0394102	0.387886	0.0244461	0.629581
ILMN_1653283	APP	6.75828	6.68064	6.80036	6.76823	6.7994	6.73884	6.78183	6.80885	6.75828	6.75171	6.73377	6.78368	-0.0099587	0.806115	0.0124375	0.614035	0.0265991	0.267205
ILMN_1653286	LOC642345	6.60439	6.61116	6.58986	6.53349	6.59061	6.58361	6.62328	6.54962	6.65345	6.59558	6.7595	6.69405	-0.0812416	0.166143	-0.113807	0.0891121	-0.0742617	0.260784
ILMN_1653292	PFKFB4	8.79907	8.99363	8.79873	9.06869	8.91238	8.95988	8.98702	8.60822	8.96384	8.63594	8.66326	8.70826	0.194658	0.0462955	0.311162	0.00361023	0.183874	0.213423
ILMN_1653310	ZNF580	6.57222	6.71913	6.65117	6.64206	6.59621	6.63095	6.67759	6.64314	6.55512	6.71364	6.61411	6.60956	0.00173599	0.976055	-0.0227014	0.569291	-0.020488	0.702022
ILMN_1653314	LOC642576	6.57557	6.64206	6.68672	6.60993	6.71021	6.72799	6.65093	6.72152	6.68333	6.61478	6.80047	6.61264	-0.0411836	0.588602	0.00674795	0.930122	0.00929804	0.894
ILMN_1653319	MC1R	8.94731	8.94183	8.63723	8.68868	8.71991	8.742	9.02753	8.48163	8.97252	8.88545	8.98858	8.9969	-0.114851	0.349688	-0.240114	0.00354424	-0.12975	0.504603
ILMN_1653324	IL22RA2	6.53479	6.52581	6.48574	6.56861	6.61264	6.52529	6.64049	6.58223	6.57733	6.51067	6.60389	6.52842	-0.0322141	0.375209	0.0211862	0.607915	0.0523552	0.209511
ILMN_1653332	HAUS6	6.51311	6.69636	6.53543	6.70146	6.60722	6.52222	6.71456	6.56925	6.63155	6.5714	6.61411	6.59223	-0.0109455	0.861916	0.0177204	0.755855	0.0458736	0.354625
ILMN_1653337	USP32	6.84396	6.66545	6.72277	6.78619	6.81548	6.78977	6.68064	6.71639	6.61595	6.77909	6.80778	6.76867	-0.04112	0.488066	0.0119646	0.466781	-0.114187	0.02256
ILMN_1653340	RECQL5	6.62377	6.69775	6.6453	6.76944	6.58197	6.66994	6.71605	6.66888	6.67407	6.59708	6.64338	6.62377	0.0341999	0.254745	0.052376	0.400977	0.0649222	0.0318627
ILMN_1653342	DUS1L	7.49541	7.47541	7.54212	7.56036	7.45628	7.41513	7.60199	7.78903	7.78032	7.55303	7.52913	7.63837	-0.0692007	0.147468	-0.0962528	0.151962	0.150269	0.0962559
ILMN_1653347	LOC643697	6.68508	6.62437	6.58035	6.6658	6.59186	6.64482	6.56867	6.60142	6.61766	6.56557	6.66947	6.6538	0.00032051	0.994581	0.00454565	0.913087	-0.0336956	0.395132
ILMN_1653352	LOC644975	6.59993	6.61264	6.63009	6.5982	6.629	6.6256	6.75861	6.67277	6.58498	6.55589	6.57594	6.6157	0.0317086	0.181551	0.0350862	0.155801	0.0896086	0.166861
ILMN_1653355	A26C3	6.6029	6.65678	6.57582	6.6029	6.61264	6.62133	6.61877	6.5541	6.62389	6.70262	6.63627	6.6003	-0.0345623	0.417489	-0.0341069	0.325188	-0.0474757	0.273665
ILMN_1653358	FUT3	6.65845	6.67923	6.64242	6.56861	6.62608	6.55538	6.67618	6.55704	6.59534	6.66604	6.63021	6.6632	0.0068838	0.683271	-0.0697911	0.046787	-0.0436286	0.303117
ILMN_1653367	TAF12	8.14015	8.23758	8.14962	8.07529	8.19755	8.30851	8.34309	8.48352	8.31816	8.35119	8.34942	8.49572	-0.222993	0.0179224	-0.204994	0.068918	-0.017186	0.819909
ILMN_1653368	LOC645238	6.61043	6.53699	6.63572	6.5982	6.669	6.60129	6.61288	6.52229	6.59236	6.55589	6.62437	6.58699	0.00529634	0.888987	0.0337453	0.329545	-0.0132414	0.715405
ILMN_1653369	FLJ39739	6.69903	6.85954	6.8052	6.8112	6.8143	6.85944	6.82757	6.86243	6.82757	6.8298	6.83001	6.82472	-0.0402488	0.441564	0.000141057	0.993254	0.0110206	0.401289
ILMN_1653372	ATP8B3	6.61815	6.63772	6.58674	6.53207	6.6029	6.59683	6.57657	6.58223	6.58498	6.62742	6.58486	6.55704	0.0244303	0.388637	-0.0125068	0.703125	-0.00851229	0.700819
ILMN_1653376	FAM171B	6.70607	6.67383	6.64242	6.68888	6.70607	6.76767	6.6736	6.66474	6.70042	6.69591	6.66947	6.72448	-0.0225124	0.406434	0.0242538	0.44583	-0.0170338	0.424319
ILMN_1653378	LOC646589	6.79616	6.66545	6.65535	6.71662	6.64974	6.56861	6.60993	6.73444	6.68731	6.68847	6.7063	6.70307	0.00637283	0.895783	-0.0542906	0.276688	-0.0220534	0.580363
ILMN_1653385	KIF3A	6.73015	6.75772	6.77526	6.74825	6.69591	6.83485	6.6538	6.70088	6.59844	6.68041	6.671	6.62536	0.0954551	0.0113023	0.100747	0.0835796	-0.00788122	0.828751
ILMN_1653386	SULT6B1	6.62536	6.65237	6.65535	6.68076	6.62377	6.61276	6.6736	6.61067	6.73844	6.62194	6.65082	6.67389	-0.00452469	0.811877	-0.00978482	0.724581	0.0253545	0.558995
ILMN_1653390	SDHALP1	6.803	6.8497	6.81569	6.66142	6.7341	6.76531	6.629	6.77219	6.79042	6.80348	6.8142	6.76404	0.028891	0.234599	-0.0736282	0.0986869	-0.0633689	0.300002
ILMN_1653394	LOC642916	6.71844	6.66415	6.78629	6.70722	6.701	6.78488	6.70584	6.63494	6.71776	6.76602	6.83884	6.7149	-0.0502932	0.374919	-0.0422226	0.400829	-0.087075	0.1207
ILMN_1653395	CCR5	6.54255	6.49056	6.55512	6.55167	6.62742	6.59683	6.59211	6.5615	6.5331	6.66888	6.61411	6.52529	-0.0733506	0.18809	-0.0107847	0.830717	-0.0405236	0.420404
ILMN_1653404	NKIRAS2	7.95728	7.97857	7.88052	7.89195	7.89138	7.86339	7.86191	8.11946	7.97285	7.73033	7.79647	7.91421	0.125121	0.111503	0.0685686	0.277472	0.171069	0.136322
ILMN_1653410	LOC647274	6.67524	6.66947	6.61815	6.58185	6.73884	6.5982	6.71307	6.57663	6.6973	6.64266	6.71799	6.688	-0.0285933	0.371567	-0.0432529	0.471284	-0.0205472	0.692643
ILMN_1653412	RAXL1	9.28713	9.13279	9.05979	8.92722	8.75621	8.9888	9.07019	8.8762	9.0012	8.96499	8.9188	9.01175	0.194724	0.0542281	-0.0744389	0.374667	0.0173504	0.796009
ILMN_1653415	SPANXA2	6.64098	6.53699	6.57582	6.63627	6.50081	6.55691	6.66438	6.54229	6.53466	6.71925	6.64639	6.688	-0.0999491	0.0538433	-0.119878	0.0547921	-0.104102	0.0912601
ILMN_1653420	LOC648278	6.65117	6.66415	6.72152	6.66285	6.5541	6.6671	6.5977	6.5615	6.55359	6.61153	6.6376	6.73219	0.0185094	0.68602	-0.0324226	0.567223	-0.0895079	0.0838732
ILMN_1653428	SPINK9	6.61534	6.50241	6.56341	6.6029	6.57026	6.59248	6.5331	6.51021	6.63155	6.56849	6.57745	6.59385	-0.0195433	0.590621	0.00861843	0.517502	-0.0216416	0.599059
ILMN_1653429	SLC35A3	7.74171	7.81638	7.58079	7.82138	7.84206	7.83482	7.50615	7.71275	7.40937	7.72728	7.45999	7.56116	0.130154	0.280598	0.249946	0.0329548	-0.0400516	0.75265
ILMN_1653432	HNRPDL	8.61738	8.71599	8.56488	8.62857	8.80366	8.64092	8.48993	8.43092	8.48415	8.57237	8.51559	8.49521	0.105026	0.103343	0.163326	0.0552708	-0.0593913	0.11669
ILMN_1653434	DMD	6.58611	6.68508	6.63155	6.55819	6.58335	6.62133	6.61141	6.5811	6.59534	6.61478	6.58486	6.63675	0.0221182	0.5313	-0.0245084	0.359991	-0.0161826	0.405069
ILMN_1653437	LOC642360	6.53284	6.65237	6.67806	6.62316	6.67277	6.58511	6.63046	6.71913	6.55014	6.63191	6.61852	6.69996	-0.0290415	0.60197	-0.0231185	0.553322	-0.0168915	0.773808
ILMN_1653438	PHF14	8.38854	8.37856	8.29658	8.18603	8.46515	8.44947	8.24944	8.34379	7.99115	8.27531	8.33571	8.32699	0.0418857	0.293879	0.05421	0.589238	-0.11788	0.332725
ILMN_1653443	CDK2	6.83359	6.8497	7.16564	6.99234	7.05139	7.0466	7.13675	6.99206	7.0466	7.19317	7.06445	7.04877	-0.152491	0.263718	-0.0720202	0.219439	-0.0436622	0.521589
ILMN_1653447	PSORS1C2	6.69625	6.63167	6.59906	6.73648	6.66746	6.69753	6.67207	6.70088	6.65046	6.55589	6.671	6.65547	0.0148716	0.762666	0.0730331	0.151166	0.0470149	0.293444
ILMN_1653453	MID1	6.60142	6.64206	6.6453	6.64794	6.63892	6.60129	6.65237	6.65535	6.65666	6.58498	6.69498	6.51482	0.0313311	0.594839	0.0311249	0.597458	0.0565344	0.341715
ILMN_1653458	LOC648840	6.58874	6.57757	6.64674	6.57291	6.71021	6.59248	6.68064	6.57663	6.56404	6.59111	6.58047	6.50426	0.0457389	0.25846	0.0665894	0.260568	0.0484944	0.350945
ILMN_1653459	IL11RA	6.67818	6.63772	6.67806	6.70561	6.65547	6.67912	6.55972	6.71227	6.66829	6.71364	6.67242	6.60476	0.0010509	0.977145	0.0164597	0.661661	-0.0168469	0.775986
ILMN_1653461	MGC48628	6.72095	6.64206	6.72902	6.58185	6.56722	6.58072	6.64326	6.7149	6.68462	6.67883	6.76194	6.66	-0.00291181	0.947853	-0.123656	0.0174724	-0.0193267	0.634128
ILMN_1653463	SULT1C3	6.70469	6.61264	6.68356	6.60722	6.59472	6.6613	6.68205	6.62912	6.54255	6.55589	6.63021	6.60808	0.0689004	0.124269	0.0230177	0.486363	0.0198421	0.689969
ILMN_1653466	HES4	8.97712	9.11348	8.78445	9.80059	9.71469	9.78761	9.46195	9.15927	9.42285	8.34873	8.37834	8.39134	0.585544	0.00369386	1.39483	1.20636e-06	0.975217	0.000526302
ILMN_1653468	LOC653145	6.67112	6.76922	6.59584	6.68766	6.71021	6.64206	6.69405	6.7487	6.66988	6.67618	6.64061	6.81452	-0.0317139	0.686493	-0.0304627	0.619611	-0.00622775	0.919581
ILMN_1653469	RPL12	11.8662	11.87	11.7887	11.8072	11.9125	11.7803	12.0891	11.9422	12.0109	11.9957	12.0369	11.8173	-0.108341	0.208978	-0.116659	0.211686	0.0641243	0.465921
ILMN_1653470	KLC2	6.79875	6.72323	6.6483	6.63772	6.63892	6.61141	6.70135	6.64602	6.59695	6.69869	6.67971	6.64025	0.050544	0.340161	-0.0435311	0.088387	-0.0247735	0.514956
ILMN_1653471	CDY1	6.62961	6.68672	6.60191	6.62011	6.63179	6.66308	6.49722	6.66474	6.52529	6.58649	6.64482	6.59857	0.0294558	0.390956	0.0283671	0.265315	-0.04754	0.434328
ILMN_1653480	KENAE	6.65428	6.83148	6.8218	6.77252	6.70883	6.78007	6.71605	6.76426	6.77362	6.72743	6.69938	6.81174	0.0230036	0.747556	0.0076232	0.860294	0.00512384	0.899741
ILMN_1653494	S100A1	6.84511	6.7385	6.7133	6.7647	6.82757	6.7449	6.84292	6.80885	6.80139	6.78803	6.74982	6.75294	0.0020396	0.963782	0.0154599	0.607419	0.054122	0.037781
ILMN_1653496	GLUL	6.66852	6.66829	6.77811	6.67701	6.68835	6.61705	6.5977	6.64458	6.63021	6.68578	6.69079	6.69996	0.0127917	0.745674	-0.0313766	0.235694	-0.0680161	0.00931642
ILMN_1653498	IGSF6	6.59993	6.64938	6.71616	6.66994	6.64314	6.64902	6.57316	6.67524	6.6901	6.6206	6.78357	6.66	-0.032899	0.609958	-0.0340234	0.531708	-0.0418873	0.532102
ILMN_1653500	LOC649902	6.64422	6.7367	6.59273	6.63482	6.63615	6.64206	6.63337	6.6307	6.69185	6.58649	6.50981	6.57443	0.100973	0.10518	0.0807664	0.0278327	0.0950629	0.0376365
ILMN_1653501	SEMA3B	6.6613	6.59857	6.70377	6.5366	6.65821	6.64206	6.55972	6.68847	6.67407	6.63651	6.5982	6.63349	0.031812	0.388839	-0.0104441	0.807219	0.0180181	0.693707
ILMN_1653504	EDG1	7.34456	7.44714	7.30834	7.16673	7.36036	7.30714	7.23629	7.21523	7.3795	7.21201	7.34714	7.23056	0.103444	0.156021	0.0148386	0.845909	0.0137733	0.846538
ILMN_1653506	LOC442015	6.54551	6.60179	6.60327	6.53051	6.50981	6.50373	6.56867	6.56741	6.65345	6.55896	6.5541	6.61264	0.00829134	0.771711	-0.0605477	0.0414127	0.021279	0.566369
ILMN_1653514	RBBP4	7.04469	6.96678	7.01256	6.91208	7.03063	6.92606	6.95924	6.89456	7.03429	6.9188	6.88322	6.93804	0.0946586	0.0269297	0.042906	0.351288	0.0493418	0.319537
ILMN_1653524	SIKE	6.68064	6.69903	6.6382	6.58486	6.66379	6.69359	6.58311	6.69405	6.6071	6.69451	6.68228	6.59223	0.0162816	0.682144	-0.00893074	0.854719	-0.0282587	0.57733
ILMN_1653527	LOC648358	6.69625	6.78325	6.64674	6.63482	6.71238	6.69892	6.63482	6.69532	6.6973	6.6973	6.66794	6.688	0.0243345	0.583248	-0.00237211	0.930216	-0.00859897	0.718943
ILMN_1653529	TEX10	8.59311	8.53538	8.7264	8.64349	8.60915	8.63518	8.57864	8.54067	8.5759	8.62022	8.52821	8.67532	0.0103803	0.890828	0.0213507	0.653887	-0.0428471	0.391296
ILMN_1653553	C14orf80	9.3217	9.49726	9.0012	9.4767	9.08245	9.13037	9.56352	9.1604	9.60964	9.51113	9.63269	9.57269	-0.298784	0.116136	-0.342331	0.0568368	-0.127652	0.433995
ILMN_1653562	ZNF705D	6.61214	6.58047	6.68975	6.58786	6.61815	6.54962	6.53608	6.5629	6.57443	6.66189	6.58624	6.51482	0.039804	0.49782	-0.00244039	0.960966	-0.0298452	0.5344
ILMN_1653566	LOC391282	6.54409	6.58949	6.6671	6.63772	6.58197	6.48104	6.48372	6.5643	6.63458	6.63046	6.62127	6.45989	0.0296908	0.676171	-0.00362579	0.962202	-0.009672	0.897479
ILMN_1653567	LOC651308	6.54255	6.68064	6.55231	6.62145	6.60993	6.61583	6.57165	6.56925	6.54255	6.66604	6.5541	6.60179	-0.0154772	0.792575	0.0084276	0.808782	-0.0461608	0.243168
ILMN_1653572	LOC647529	6.68777	6.56709	6.59422	6.60993	6.64193	6.61141	6.67912	6.57971	6.58498	6.54255	6.53141	6.63844	0.0455601	0.412904	0.0502915	0.229939	0.043804	0.402919
ILMN_1653573	LOC644846	6.57557	6.55436	6.67383	6.66994	6.63033	6.63361	6.6157	6.52058	6.64602	6.76503	6.66225	6.72289	-0.115473	0.0714003	-0.0720966	0.0902064	-0.122622	0.0635041
ILMN_1653575	IL18BP	6.72471	6.81388	6.70377	6.85334	6.77142	6.81248	6.79464	6.66106	6.69457	6.72584	6.8263	6.86254	-0.0574435	0.339583	0.0075214	0.881194	-0.0881342	0.198761
ILMN_1653577	C21orf41	6.62096	6.56709	6.6382	6.60993	6.63033	6.58361	6.55666	6.68602	6.62864	6.66189	6.56329	6.54074	0.0201128	0.663779	0.019318	0.65106	0.0351327	0.541967
ILMN_1653578	XYLT1	6.75071	6.61264	6.63421	6.63337	6.69451	6.6613	6.68963	6.67818	6.69625	6.6465	6.6376	6.70745	0.00200224	0.968839	-0.000788656	0.979015	0.0241721	0.344634
ILMN_1653579	LOC401845	6.6671	6.57165	6.58035	6.77115	6.71639	6.69359	6.70446	6.69126	6.68462	6.61018	6.58348	6.62706	-0.000539916	0.987732	0.120135	0.0102496	0.0865394	0.0034445
ILMN_1653583	LOC728601	6.55845	6.57013	6.66568	6.61116	6.669	6.61276	6.61141	6.55998	6.53167	6.53777	6.5541	6.62864	0.0245856	0.606115	0.0574746	0.164481	-0.00581551	0.880895
ILMN_1653591	TRIM40	6.60142	6.69903	6.71742	6.55666	6.63747	6.68205	6.64794	6.59584	6.65809	6.59857	6.62875	6.75706	0.0111621	0.862529	-0.0360675	0.585478	-0.027502	0.626634
ILMN_1653599	ATP5D	10.386	10.2096	10.8409	10.1841	10.4574	10.3026	10.5459	10.844	10.7364	10.5115	10.6351	10.7156	-0.141891	0.511618	-0.306004	0.0364421	0.0880784	0.450564
ILMN_1653601	LOC646144	6.7033	6.68345	6.72004	6.75939	6.77603	6.68858	6.68789	6.76293	6.70607	6.70561	6.72232	6.6632	0.00522307	0.811713	0.0442937	0.239345	0.0219216	0.486749
ILMN_1653603	LOC645084	6.64278	6.56861	6.64386	6.69591	6.72652	6.54371	6.72221	6.57971	6.65511	6.59708	6.69079	6.86717	-0.0999326	0.294974	-0.0629708	0.552734	-0.0660045	0.500567
ILMN_1653607	TXNDC2	6.64278	6.72573	6.72152	6.62596	6.6029	6.68474	6.65678	6.67277	6.62231	6.57443	6.65666	6.63675	0.0740597	0.113212	0.0152513	0.68335	0.0280055	0.3874
ILMN_1653612	KCTD9	8.37459	8.32719	8.40253	8.27897	8.43373	8.27982	8.13161	8.33899	8.00643	8.05503	8.14717	7.96459	0.312508	0.00542714	0.275251	0.0201707	0.103416	0.401824
ILMN_1653613	PIGO	7.35246	7.34145	7.64774	7.29206	7.49584	7.39548	7.49268	7.53825	7.54623	7.40929	7.36411	7.42497	0.047761	0.663859	-0.00499811	0.939224	0.12626	0.00694634
ILMN_1653615	FLJ34969	6.71204	6.66415	6.78193	6.60993	6.58197	6.62011	6.59919	6.64998	6.55014	6.62462	6.63167	6.6664	0.0784757	0.0983302	-0.0368922	0.0988975	-0.0411297	0.26276
ILMN_1653618	ZZZ3	7.72835	7.74396	7.76171	7.83184	7.9295	7.98546	7.49819	7.59665	7.40025	7.56323	7.5864	7.53373	0.18355	0.00052491	0.35448	0.00171021	-0.0627569	0.345304
ILMN_1653622	LOC648716	6.64098	6.72749	6.73026	6.68076	6.76404	6.72209	6.57846	6.77471	6.77647	6.68578	6.78193	6.80874	-0.0592416	0.280018	-0.0365217	0.456966	-0.0489388	0.552567
ILMN_1653628	LOC652641	6.58448	6.59993	6.57582	6.66734	6.49775	6.53583	6.51311	6.70088	6.57001	6.61153	6.69382	6.53925	-0.028124	0.567542	-0.0478924	0.520464	-0.0202014	0.790987
ILMN_1653636	LOC644856	6.65702	6.80295	6.52477	6.58649	6.5379	6.62401	6.55475	6.62377	6.6756	6.82334	6.58348	6.69114	-0.0377415	0.740102	-0.116523	0.189055	-0.0812829	0.354526
ILMN_1653646	UBL7	6.86037	6.8497	6.97051	6.94846	7.00184	6.91089	7.02015	6.94253	7.033	7.00081	7.05266	7.08378	-0.152221	0.0288278	-0.0920173	0.0619688	-0.047189	0.273461
ILMN_1653648	GPR63	6.9079	6.89809	6.94351	6.92231	6.97262	6.92493	6.92112	6.79843	7.02172	6.92231	6.87773	6.93667	0.00426238	0.858833	0.0277152	0.314718	0.00151889	0.982988
ILMN_1653650	LOC641948	6.80424	6.74367	6.68064	6.70146	6.71238	6.82005	6.76999	6.75361	6.76282	6.70699	6.72232	6.70745	0.0305961	0.443678	0.0323793	0.444111	0.0498882	0.00195748
ILMN_1653652	PTPRC	6.55679	6.48332	6.55064	6.62011	6.64314	6.67159	6.63046	6.53479	6.56557	6.6538	6.61264	6.66474	-0.113478	0.0161476	0.00121972	0.957978	-0.0667894	0.107904
ILMN_1653660	LOC642947	6.63216	6.61116	6.53207	6.70561	6.63892	6.69892	6.59621	6.64998	6.73072	6.57001	6.57449	6.68041	-0.0165075	0.744296	0.0728455	0.156681	0.0506651	0.394781
ILMN_1653665	TTN	6.66285	6.63627	6.69822	6.5177	6.60722	6.51021	6.62608	6.67818	6.66533	6.68333	6.70895	6.59546	0.00319923	0.938195	-0.117536	0.0644181	-0.00604693	0.880559
ILMN_1653666	KLHL7	6.7595	6.63167	6.72902	6.73884	6.68835	6.67159	6.65976	6.79475	6.71181	6.66071	6.70762	6.74232	0.003179	0.947334	-0.00395654	0.90493	0.0185575	0.706514
ILMN_1653667	LOC643423	6.77417	6.7332	6.77021	6.70883	6.77701	6.69753	6.76856	6.75539	6.67701	6.61153	6.58774	6.70745	0.123619	0.03346	0.0922173	0.10536	0.0980793	0.102194
ILMN_1653670	CUL3	6.57051	6.78325	6.74232	6.60439	6.59323	6.64614	6.49376	6.59584	6.59993	6.52842	6.65666	6.80874	0.0340864	0.759485	-0.0500226	0.577481	-0.101431	0.313969
ILMN_1653678	DTX4	6.56303	6.63482	6.62255	6.6273	6.59757	6.69114	6.69248	6.75539	6.65964	6.68333	6.63482	6.59857	-0.0321058	0.386766	-0.000235481	0.99522	0.0635961	0.163491
ILMN_1653687	GALNT9	6.6937	6.58811	6.671	6.78619	6.65821	6.72448	6.75439	6.64314	6.67112	6.63941	6.74478	6.76404	-0.0651388	0.264999	0.00688089	0.903927	-0.0265291	0.631396
ILMN_1653704	IL9	6.69625	6.6435	6.57884	6.61852	6.63337	6.60389	6.629	6.64458	6.58924	6.76105	6.70762	6.64025	-0.0634432	0.262824	-0.0843799	0.0788784	-0.0820344	0.100991
ILMN_1653708	CORO1B	9.10753	9.12209	9.14101	8.88545	9.02833	8.92168	9.17749	9.09848	9.25475	9.02243	9.05144	9.13219	0.0548568	0.184382	-0.123532	0.0841289	0.108221	0.124454
ILMN_1653709	TIMM9	8.20985	8.29136	8.51261	8.48352	8.4681	8.39201	8.49587	8.89674	8.36855	8.57115	8.52182	8.54809	-0.209082	0.0844622	-0.0991465	0.0351755	0.0400326	0.81451
ILMN_1653711	FZD2	8.60915	8.54367	8.466	8.52076	8.3724	8.45729	8.60518	8.39507	8.74303	8.38249	8.52773	8.37693	0.110556	0.161219	0.0210994	0.763318	0.15204	0.248159
ILMN_1653712	UAP1L1	7.07507	6.9069	6.96927	6.93235	6.95026	6.98582	7.02015	6.97066	7.11706	7.01621	7.0395	7.07863	-0.061031	0.308469	-0.0886344	0.021112	-0.00882415	0.859308
ILMN_1653716	LOC645565	6.56595	6.61399	6.64242	6.64206	6.56303	6.50532	6.60845	6.68474	6.62231	6.58035	6.56036	6.56494	0.0389058	0.167702	0.00158894	0.970285	0.0699521	0.0446895
ILMN_1653718	ZFAND2B	8.58272	8.48972	8.53686	8.41532	8.34351	8.42504	8.72666	8.49552	8.80098	8.5569	8.48211	8.56984	0.000153414	0.996997	-0.141658	0.0195289	0.138106	0.223452
ILMN_1653719	ITGBL1	6.76083	6.66699	6.57884	6.68766	6.70883	6.72323	6.7792	6.69126	6.66391	6.63349	6.59968	6.69242	0.0270232	0.671338	0.0647087	0.0894802	0.069594	0.189609
ILMN_1653724	LOC648716	6.64278	6.61264	6.66118	6.62145	6.63747	6.64902	6.67513	6.69671	6.64458	6.63796	6.59061	6.5841	0.0346402	0.192046	0.0317557	0.165782	0.0679145	0.0404403
ILMN_1653728	ERBB4	6.53945	6.61815	6.70377	6.62596	6.48601	6.6763	6.55475	6.51311	6.62864	6.47402	6.68672	6.63844	0.0207299	0.808272	-0.0036365	0.968275	-0.0342285	0.662317
ILMN_1653730	OXCT2	6.91617	6.92577	6.88404	6.88232	6.876	6.86058	6.9108	6.85634	6.89189	6.92606	6.872	6.98221	-0.0181011	0.624915	-0.0537958	0.172865	-0.0404179	0.319622
ILMN_1653738	INTS4	6.86717	6.82906	6.74232	6.8243	6.80413	6.82334	6.80413	6.84057	6.71027	6.80209	6.83485	6.91458	-0.0376539	0.491712	-0.0332483	0.384046	-0.0655173	0.269914
ILMN_1653742	FAM48B1	6.71605	6.73026	6.66568	6.61116	6.66249	6.52045	6.70446	6.69126	6.59695	6.66734	6.6055	6.63675	0.0674669	0.063624	-0.038496	0.442368	0.0276917	0.50937
ILMN_1653744	LOC643927	6.65273	6.61815	6.81334	6.64938	6.7048	6.61276	6.67513	6.60463	6.55193	6.57594	6.64938	6.60636	0.0841788	0.257466	0.0450868	0.257802	5.58162e-07	0.99999
ILMN_1653745	LOC727958	6.71204	6.65678	6.58986	6.59671	6.64602	6.68064	6.57468	6.59198	6.74556	6.54409	6.62127	6.64639	0.0489776	0.354847	0.0372072	0.396795	0.0334921	0.620038
ILMN_1653748	CST11	6.64098	6.62437	6.69938	6.63191	6.6569	6.5541	6.55819	6.59708	6.68041	6.56849	6.56659	6.62084	0.069604	0.0734641	0.0289982	0.462162	0.026585	0.544517
ILMN_1653750	SOX10	6.69498	6.75605	6.68064	6.68626	6.63337	6.71673	6.5468	6.71021	6.61766	6.68193	6.60241	6.67253	0.0582671	0.162857	0.0264956	0.490781	-0.0273998	0.635849
ILMN_1653760	LOC651430	6.59048	6.69636	6.66852	6.59223	6.65273	6.56303	6.62608	6.60142	6.52529	6.59558	6.65511	6.62706	0.0258726	0.512661	-0.0232541	0.501552	-0.0416541	0.298236
ILMN_1653761	MYCN	6.65845	6.60636	6.67665	6.65093	6.701	6.62133	6.669	6.63917	6.73844	6.71925	6.70359	6.57606	-0.0191447	0.721262	-0.0085485	0.874914	0.0159013	0.783227
ILMN_1653762	NRSN1	6.71204	6.60327	6.63009	6.57013	6.57165	6.64614	6.52372	6.59584	6.65345	6.61607	6.60969	6.62377	0.0319582	0.387237	-0.0205356	0.46442	-0.0255081	0.536245
ILMN_1653766	CCL24	6.49243	6.57013	6.63421	6.55487	6.75794	6.65189	6.55308	6.63917	6.66249	6.62341	6.65797	6.63021	-0.0716066	0.16601	0.0177064	0.78114	-0.0189508	0.616051
ILMN_1653768	LOC641733	6.49243	6.53867	6.59136	6.64338	6.57468	6.56861	6.52842	6.44892	6.6071	6.55436	6.59509	6.46146	0.00384931	0.940907	0.0585869	0.273946	-0.00882596	0.890903
ILMN_1653771	WDR63	6.6658	6.69636	6.60327	6.60587	6.65117	6.65345	6.78183	6.62645	6.65511	6.63046	6.78357	6.55845	-0.00234537	0.97551	-0.0206622	0.776905	0.0303044	0.729698
ILMN_1653783	MLC1	6.63216	6.63627	6.70895	6.66285	6.71353	6.76404	6.67759	6.62231	6.51744	6.60883	6.59968	6.60956	0.0531017	0.102241	0.107448	0.0216442	-0.000243702	0.996117
ILMN_1653786	LOC644887	6.55998	6.53207	6.42615	6.56278	6.629	6.58649	6.56867	6.50505	6.55193	6.5331	6.59509	6.56329	-0.0577636	0.264226	0.0289265	0.334355	-0.0219425	0.448348
ILMN_1653787	LOC341604	6.73535	6.71913	6.74937	6.63482	6.72015	6.6658	6.73535	6.62499	6.69457	6.6901	6.62875	6.6569	0.0760311	0.0183509	0.0150072	0.649495	0.0263856	0.512713
ILMN_1653788	RNF208	6.68777	6.63167	6.59136	6.61852	6.62742	6.66	6.57165	6.72039	6.66988	6.65237	6.60697	6.6538	-0.00078279	0.981601	-0.00240119	0.909698	0.0162568	0.743186
ILMN_1653793	PDPK1	7.23472	7.26758	7.28999	7.25521	7.34186	7.26209	7.26568	7.34954	7.44653	7.3022	7.29033	7.23694	-0.0123924	0.654849	0.00990193	0.787129	0.0774293	0.238757
ILMN_1653794	C6orf160	12.9696	12.8609	12.7744	12.9258	12.9696	12.9533	12.9369	13.0951	12.7301	12.8042	12.894	12.8827	0.00796583	0.90566	0.0892626	0.0449654	0.0603968	0.610228
ILMN_1653797	C6orf62	10.0803	9.90102	10.2816	10.4397	10.4474	10.2932	9.70287	10.0793	9.69404	9.77222	9.71921	9.69979	0.357259	0.0332606	0.663033	0.000264386	0.0949887	0.501742
ILMN_1653799	LOC727735	6.56734	6.58348	6.63723	6.629	6.71639	6.75783	6.59919	6.65964	6.62718	6.67337	6.65666	6.74097	-0.0943161	0.0473399	0.0107385	0.826477	-0.0616659	0.11872
ILMN_1653801	LOC388282	6.66415	6.5821	6.60191	6.73377	6.72243	6.70503	6.74691	6.66622	6.70469	6.78803	6.67383	6.61264	-0.0754463	0.256437	0.0289103	0.608345	0.0144379	0.810689
ILMN_1653807	LOC730760	6.50081	6.61399	6.66947	6.45537	6.59323	6.57165	6.64193	6.65404	6.52045	6.51067	6.53802	6.56011	0.0584911	0.320703	0.00381468	0.936707	0.0692095	0.198773
ILMN_1653814	HBBP1	6.63518	6.76602	6.68356	6.55959	6.60142	6.65189	6.69683	6.57971	6.64169	6.70262	6.69498	6.57443	0.0375819	0.541743	-0.0530405	0.342995	-0.0179291	0.754601
ILMN_1653821	ADRA1A	6.58147	6.62875	6.55512	6.57165	6.5541	6.5331	6.6538	6.56595	6.56849	6.62462	6.52019	6.55845	0.0206962	0.608948	-0.0148048	0.672131	0.028327	0.53699
ILMN_1653822	NEK2	7.23761	7.07703	7.13619	7.10013	7.18174	7.13931	7.02144	7.12895	6.93946	7.17612	7.19661	7.02083	0.0190872	0.805736	0.00920386	0.886057	-0.101241	0.264286
ILMN_1653824	LAMC2	6.82461	6.91855	6.92231	6.86666	6.8244	7.04069	6.96324	6.81142	6.88633	6.84041	6.75133	6.88977	0.0613231	0.300376	0.0834164	0.342906	0.0598254	0.372861
ILMN_1653826	FGF13	6.61815	6.67665	6.57582	6.54872	6.70365	6.60129	6.56867	6.65809	6.64602	6.59857	6.59968	6.6664	0.00199188	0.959481	-0.00366077	0.945922	0.00271511	0.943321
ILMN_1653828	CHFR	8.83134	8.84441	8.74359	8.68404	8.73944	8.76942	8.67923	8.36133	8.71945	8.36421	8.58373	8.38006	0.363781	0.0093275	0.288299	0.0183775	0.144005	0.341472
ILMN_1653829	LOC643338	6.70745	6.69636	6.53802	6.6563	6.60439	6.60993	6.65093	6.64458	6.65046	6.62194	6.66225	6.64326	0.00479571	0.935808	-0.0189438	0.400622	0.00617293	0.629109
ILMN_1653833	LOC144776	6.64974	6.75917	6.63009	6.66734	6.63033	6.61583	6.65093	6.65678	6.71181	6.70262	6.56163	6.57757	0.0657243	0.334824	0.0238927	0.638931	0.0592349	0.289973
ILMN_1653834	OGFOD1	6.69219	6.60636	6.75605	6.65892	6.71353	6.62133	6.65237	6.64193	6.6388	6.56709	6.67689	6.64639	0.0547463	0.370602	0.0344691	0.460643	0.0142454	0.68804
ILMN_1653836	C11orf41	8.3423	8.46234	8.44599	8.29404	8.28155	8.41658	8.2298	8.29144	8.1636	8.33031	8.30824	8.30738	0.101566	0.0569879	0.0154113	0.742306	-0.0870288	0.0819822
ILMN_1653846	WHDC1L2	6.61043	6.60463	6.63155	6.61116	6.58473	6.66852	6.52065	6.54962	6.60587	6.54551	6.70492	6.57153	0.00821951	0.87751	0.0141555	0.810331	-0.0486064	0.429442
ILMN_1653856	STS-1	7.74589	7.72694	7.66642	7.765	7.7092	7.67247	7.77388	7.73238	7.77009	7.85081	7.84748	7.76659	-0.108546	0.0409974	-0.106068	0.0510901	-0.0628433	0.108871
ILMN_1653861	SCMH1	8.22209	8.16844	8.13948	8.0791	8.07719	8.14586	8.23268	7.95244	8.30788	8.15675	8.10505	8.12128	0.0489802	0.162103	-0.026973	0.378386	0.0366431	0.754107
ILMN_1653864	LOC644326	6.55845	6.61116	6.69671	6.67701	6.60439	6.61705	6.56867	6.54525	6.66664	6.61018	6.61705	6.60808	0.0103343	0.810625	0.0210426	0.403747	-0.0182524	0.650017
ILMN_1653865	LOC642451	6.61386	6.76349	6.62718	6.64938	6.70607	6.69242	6.70745	6.75684	6.71181	6.7289	6.67524	6.71639	-0.0386678	0.48641	-0.0242212	0.361807	0.0185217	0.458952
ILMN_1653867	ZNF483	6.72471	6.67665	6.66273	6.64938	6.73535	6.6256	6.72958	6.72311	6.65046	6.65809	6.67842	6.6632	0.0214601	0.338121	0.00353911	0.92185	0.0344826	0.256796
ILMN_1653871	NAMPT	7.19391	7.22352	7.24824	7.36587	7.37042	7.41575	7.20916	7.20245	7.12439	7.22696	7.35217	7.19395	-0.035802	0.518921	0.12632	0.067556	-0.0790239	0.226475
ILMN_1653876	SPG21	6.7757	6.91855	6.87384	6.85438	6.8308	6.87189	6.7367	6.80058	7.11828	6.88343	6.80424	6.90415	-0.00791034	0.886514	-0.0115852	0.740936	0.021245	0.870068
ILMN_1653878	CACNB2	6.67112	6.52725	6.60772	6.59534	6.66474	6.60993	6.61877	6.55704	6.5331	6.49109	6.58774	6.59061	0.0455489	0.438088	0.0668576	0.161084	0.0131574	0.766977
ILMN_1653879	NPTX1	6.56449	6.50664	6.73557	6.57013	6.58624	6.61705	6.58761	6.58699	6.56404	6.64398	6.58197	6.57291	0.00261138	0.972905	-0.00848214	0.76265	-0.0200755	0.443607
ILMN_1653896	ATRIP	7.84006	7.94047	7.84174	7.81299	7.72096	7.83173	7.81389	7.64109	7.90973	7.66088	7.65239	7.75905	0.183321	0.0183825	0.0977901	0.113471	0.097467	0.319081
ILMN_1653904	TXNRD2	6.78923	6.85954	6.79345	6.67136	6.71353	6.68614	6.6495	6.72788	6.85665	6.79821	6.67242	6.73512	0.0788231	0.13975	-0.0449095	0.30666	0.00942573	0.900048
ILMN_1653910	LOC650496	6.95669	6.83894	6.96927	6.93794	7.0466	6.89406	6.71776	6.9235	6.85407	6.99963	6.94453	6.97013	-0.0497974	0.325334	-0.0118983	0.816621	-0.139658	0.089127
ILMN_1653927	SNORD83A	6.61386	6.56049	6.54151	6.63033	6.62499	6.60389	6.56125	6.5784	6.59236	6.61766	6.58774	6.66	-0.0498472	0.173522	-0.00206148	0.931288	-0.0444652	0.123049
ILMN_1653934	LOC650517	6.58035	6.64783	6.57733	6.60439	6.63747	6.58223	6.58611	6.62499	6.61595	6.6465	6.67383	6.53128	-0.015372	0.771084	-0.00917592	0.853302	-0.00818733	0.865163
ILMN_1653940	USP2	6.75695	6.83148	6.71055	6.82313	6.7403	6.72686	6.75584	6.88282	6.80606	6.74501	6.73648	6.72579	0.0305679	0.439661	0.027674	0.417074	0.0791439	0.101381
ILMN_1653945	LOC644116	6.81238	6.75772	6.78073	6.86151	6.72652	6.76404	6.64326	6.68847	6.68731	6.81185	6.75561	6.74232	0.0136818	0.633552	0.0140929	0.772339	-0.0969177	0.0203147
ILMN_1653956	LOC644624	6.65117	6.54821	6.54299	6.63482	6.69196	6.64771	6.67618	6.55256	6.60858	6.69149	6.52998	6.64326	-0.0407863	0.53025	0.0365852	0.512034	-0.00913654	0.885847
ILMN_1653965	ITGB4	6.6613	6.57316	6.60042	6.6465	6.60722	6.63095	6.63191	6.6206	6.65511	6.54988	6.64482	6.6173	0.00763027	0.852164	0.0242236	0.470541	0.0318748	0.347559
ILMN_1653980	METTL8	6.74221	6.81388	6.59757	6.78007	6.71135	6.7063	6.61141	6.68602	6.73985	6.66888	6.75817	6.67701	0.016536	0.824147	0.0312233	0.447733	-0.0222598	0.659783
ILMN_1653991	LOC643344	6.6671	6.61264	6.72152	6.6563	6.61815	6.70757	6.62754	6.68602	6.65189	6.60587	6.75561	6.64025	-0.000156492	0.997871	-0.00656893	0.905878	-0.0120906	0.814886
ILMN_1653995	LOC390570	6.61534	6.60956	6.61534	6.58486	6.61264	6.69114	6.70745	6.68602	6.59385	6.57594	6.45296	6.58911	0.0740729	0.163044	0.0902072	0.168798	0.123101	0.0913171
ILMN_1654001	SMC6	7.69673	7.72694	7.52277	7.76157	7.6967	7.79987	7.63335	7.83733	7.32216	7.6892	7.71394	7.6995	-0.0520651	0.461727	0.0518338	0.169315	-0.103263	0.528929
ILMN_1654010	AGPAT3	6.81681	6.72573	6.84616	6.87773	6.79173	6.78368	6.80036	6.76569	6.78488	6.85344	6.9095	6.87107	-0.0817738	0.109462	-0.0602946	0.154043	-0.0943605	0.0081799
ILMN_1654013	C17orf28	6.72346	6.68508	6.7189	6.76238	6.70238	6.69359	6.76459	6.68064	6.71639	6.74232	6.76597	6.79183	-0.0575609	0.0371896	-0.0472587	0.14229	-0.0461686	0.177095
ILMN_1654016	MRLC2	12.319	12.2441	12.2758	12.4367	12.4216	12.3411	12.426	12.5891	12.2101	12.3269	12.4726	12.5374	-0.16596	0.065558	-0.0458195	0.542801	-0.0371972	0.782829
ILMN_1654031	TPTE2	6.69903	6.53699	6.565	6.5366	6.54821	6.62011	6.59497	6.53777	6.56404	6.67207	6.54615	6.63021	-0.015804	0.812014	-0.0478391	0.350615	-0.0505509	0.280541
ILMN_1654032	ZER1	6.99234	6.91612	6.98933	6.92122	6.9013	6.89778	6.91458	6.9105	7.033	6.91497	6.95631	6.8927	0.0446042	0.225037	-0.0145584	0.507236	0.0313676	0.517833
ILMN_1654043	LOC653539	6.6029	6.73962	6.65535	6.72062	6.62377	6.60845	6.66273	6.69265	6.74702	6.67618	6.67689	6.68205	-0.0124136	0.771059	-0.0274254	0.478985	0.0224284	0.415939
ILMN_1654049	LOC442560	6.53479	6.51927	6.58511	6.65093	6.57316	6.60389	6.49243	6.74736	6.55653	6.70135	6.58047	6.59385	-0.0788298	0.141476	-0.0158914	0.738733	-0.0264486	0.772739
ILMN_1654056	LOC642888	6.50678	6.64061	6.58674	6.64794	6.59186	6.62401	6.72221	6.71021	6.68193	6.62462	6.68672	6.63349	-0.070234	0.181279	-0.0270057	0.345898	0.0565059	0.0681077
ILMN_1654060	MKNK2	7.18504	7.09926	7.15121	7.12706	7.09777	7.13108	7.07911	7.20754	7.26155	7.22154	7.24415	7.21095	-0.0803779	0.0399709	-0.10691	0.00173529	-0.0428146	0.479664
ILMN_1654063	HYDIN	6.63216	6.77789	6.61815	6.71662	6.73286	6.78727	6.75299	6.63203	6.66391	6.79443	6.71947	6.66177	-0.049159	0.484622	0.0203602	0.667241	-0.0422463	0.468256
ILMN_1654064	LOC644334	6.6937	6.56366	6.59136	6.56861	6.6569	6.60389	6.55819	6.84532	6.70607	6.51744	6.73648	6.73072	-0.0453039	0.610911	-0.0517431	0.535908	0.0416494	0.723845
ILMN_1654065	ATOH8	6.74764	6.79875	6.68064	6.72846	6.8263	6.74982	6.80413	6.83001	6.68333	6.82101	6.8263	6.72777	-0.0493492	0.351456	-0.0235006	0.618946	-0.0192024	0.746259
ILMN_1654068	NUDT1	7.29719	7.65975	7.43692	7.40358	7.50656	7.4672	7.625	7.65856	7.6148	7.627	7.76275	7.87932	-0.291737	0.0853709	-0.297243	0.0196021	-0.12357	0.170718
ILMN_1654072	CX3CL1	6.75695	6.54164	6.55064	6.61558	6.57165	6.60845	6.48909	6.60142	6.57443	6.71078	6.53634	6.67701	-0.0249653	0.791417	-0.0428129	0.480701	-0.0863979	0.243635
ILMN_1654073	LOC647213	6.49616	6.67383	6.59584	6.59074	6.68695	6.62401	6.58473	6.66474	6.60858	6.6632	6.61411	6.63191	-0.0477969	0.421179	-0.00250755	0.940656	-0.0170567	0.571594
ILMN_1654074	ITGA3	6.97442	6.82281	6.93324	6.82641	6.90541	6.88556	7.00441	7.06995	6.84407	6.88495	6.9108	7.03227	-0.0325177	0.638733	-0.0702138	0.242472	0.0301366	0.728787
ILMN_1654099	LRIG2	7.03195	7.01348	7.00819	7.0641	7.04032	7.049	6.84292	7.10113	7.10606	6.93412	6.98951	6.97013	0.0532871	0.0398988	0.0865521	0.0080275	0.0521159	0.587208
ILMN_1654108	FLJ31401	6.71605	6.64938	6.54299	6.54435	6.63337	6.63651	6.55308	6.58223	6.51744	6.64806	6.61852	6.63506	0.00225823	0.966878	-0.0291378	0.405898	-0.082965	0.0157471
ILMN_1654109	EGFLAM	6.70053	6.60796	6.7189	6.63337	6.67806	6.61141	6.55014	6.5643	6.62231	6.6594	6.64938	6.65547	0.0210478	0.574267	-0.0138036	0.524643	-0.0758348	0.0271474
ILMN_1654112	PARD6A	7.75409	7.75208	7.66418	7.60641	7.46245	7.53212	7.77065	7.64231	7.9785	7.6683	7.7715	7.72824	0.00077399	0.986218	-0.189015	0.0210065	0.0744758	0.507402
ILMN_1654118	BCL2L1	10.8842	10.719	11.0615	10.6624	10.7156	10.739	10.8706	10.9527	10.7838	10.6098	10.4466	10.6408	0.322505	0.0495419	0.139942	0.0952945	0.303325	0.0173229
ILMN_1654129	MIA3	6.57557	6.69079	6.63155	6.60722	6.60142	6.62961	6.6736	6.61926	6.58924	6.59857	6.50678	6.6756	0.0389909	0.545199	0.0191052	0.719429	0.0337187	0.570874
ILMN_1654137	LOC649700	6.55679	6.58949	6.57443	6.66994	6.61546	6.55845	6.56867	6.59708	6.58223	6.6206	6.65082	6.65237	-0.0676953	0.00844509	-0.0266463	0.474684	-0.0586018	0.0113324
ILMN_1654141	ZDHHC20	6.65547	6.82906	6.79627	6.75561	6.72141	6.76404	6.80606	6.84532	6.61766	6.7341	6.66522	6.76116	0.0401049	0.543158	0.0268594	0.440483	0.0361871	0.658176
ILMN_1654151	COX6C	11.7667	12.0045	11.9264	12.1011	11.9457	12.0277	12.0706	12.0387	11.8193	12.0974	12.1475	11.9986	-0.181948	0.0921814	-0.0562914	0.419877	-0.10493	0.30976
ILMN_1654153	BTBD11	6.69068	6.65237	6.671	6.75817	6.7459	6.75127	6.73805	6.6376	6.7412	6.68193	6.66071	6.75294	-0.0271735	0.416313	0.0532566	0.131096	0.00708999	0.879774
ILMN_1654165	SLC45A2	6.63965	6.65833	6.61534	6.48358	6.64055	6.60389	6.65535	6.64314	6.54255	6.54087	6.67383	6.59385	0.0349235	0.438201	-0.0268399	0.683457	0.0108306	0.847032
ILMN_1654170	HERC2P2	6.76735	6.80424	6.77021	6.77362	6.76724	6.71456	6.63615	6.76293	6.73241	6.73139	6.71536	6.71639	0.0595512	0.00999363	0.030758	0.188365	-0.0105528	0.797857
ILMN_1654171	LOC652593	6.53634	6.58498	6.53207	6.58786	6.62499	6.72062	6.69248	6.52581	6.53777	6.59558	6.61852	6.52215	-0.0276226	0.45791	0.0657347	0.251472	0.00659859	0.919118
ILMN_1654185	LOC391347	6.74221	6.73162	6.65976	6.6563	6.68438	6.6763	6.65833	6.80542	6.71925	6.69451	6.63917	6.7117	0.0294026	0.434795	-0.00946582	0.706775	0.045871	0.392957
ILMN_1654187	LOC644360	6.84396	6.82376	6.80284	6.76591	6.74725	6.89959	6.85396	6.88526	6.81877	6.66734	6.76597	6.70446	0.110932	0.0234739	0.091662	0.176608	0.140075	0.0154688
ILMN_1654195	GCC2	6.64422	6.65833	6.62109	6.54435	6.57316	6.54962	6.51311	6.60142	6.54551	6.55155	6.63167	6.54577	0.0648846	0.0947971	-0.0206167	0.517773	-0.0229833	0.576618
ILMN_1654200	LOC653489	6.77417	6.65093	6.7332	6.65761	6.69451	6.7133	6.65833	6.63349	6.81008	6.68193	6.65797	6.64794	0.056819	0.205385	0.0258605	0.249574	0.0380178	0.535183
ILMN_1654204	DNAJC5B	6.50849	6.6435	6.54923	6.46928	6.56569	6.73501	6.63191	6.67136	6.57896	6.65678	6.72527	6.62706	-0.102628	0.106519	-0.079708	0.390912	-0.0422949	0.344841
ILMN_1654210	CD1C	6.7289	6.76922	6.84188	6.64061	6.71639	6.64614	6.67912	6.69265	6.66988	6.70434	6.79075	6.64326	0.0672162	0.281679	-0.0450677	0.411906	-0.0322326	0.49792
ILMN_1654212	DOK7	6.67383	6.78455	6.68835	6.64206	6.71238	6.76016	6.65833	6.85758	6.7876	6.77516	6.68835	6.7133	-0.0100257	0.828157	-0.0207344	0.654289	0.0422362	0.54423
ILMN_1654217	MPP2	6.8522	6.89688	6.81441	6.73252	6.83253	6.8581	6.97447	6.75539	6.87057	6.87977	6.96309	6.80004	-0.0264729	0.642203	-0.0732497	0.293972	-0.014159	0.866236
ILMN_1654226	LOC642591	6.67524	6.72164	6.71055	6.61558	6.73659	6.61583	6.67912	6.73444	6.64314	6.70951	6.57594	6.59385	0.0760423	0.160001	0.0295669	0.637628	0.0591316	0.298853
ILMN_1654228	PCDHGA3	6.65702	6.58047	6.56341	6.57582	6.54074	6.57757	6.58911	6.69532	6.59236	6.56404	6.62584	6.59223	0.00626336	0.862306	-0.0293272	0.244541	0.0315609	0.465692
ILMN_1654240	LOC653664	6.58285	6.69079	6.64386	6.58924	6.54988	6.58361	6.66746	6.58699	6.50915	6.57884	6.57291	6.56849	0.0657548	0.104282	0.000828411	0.950926	0.0144543	0.768088
ILMN_1654246	SIRT6	7.0181	6.91612	6.96193	7.17367	7.04551	6.95982	7.15348	7.18331	7.0446	7.00838	6.89562	7.03227	-0.0133726	0.807697	0.0809067	0.34185	0.148372	0.0675333
ILMN_1654249	LOC647083	6.81238	6.68345	6.88033	6.68485	6.6471	6.61276	6.72056	6.58536	6.68041	6.68041	6.68835	6.66474	0.11422	0.120967	-0.0295925	0.248767	-0.0157241	0.718798
ILMN_1654250	MRPL21	6.74937	6.82376	6.89753	6.79378	6.95026	6.88779	6.86533	6.82895	6.84949	6.83884	6.86635	6.86099	-0.0318387	0.505621	0.0218842	0.660757	-0.00746844	0.609101
ILMN_1654261	TRPV1	6.56303	6.67242	6.55512	6.55819	6.64055	6.57291	6.60104	6.54666	6.66533	6.53932	6.56849	6.67853	0.00141052	0.981387	-0.00489569	0.925817	0.00889922	0.878266
ILMN_1654262	ZMAT3	7.83173	7.92654	7.88316	7.64905	7.75571	7.69599	7.92924	7.99069	7.84222	8.13704	8.19293	8.18004	-0.289523	0.000846067	-0.469753	0.000181963	-0.249287	0.00573654
ILMN_1654268	HMGB2	9.22634	9.34992	9.12872	9.11959	9.14421	9.33033	9.10439	9.52029	8.88936	9.29648	9.3401	9.33084	-0.0874783	0.25179	-0.124431	0.140516	-0.151128	0.461326
ILMN_1654279	LOC389888	6.60587	6.55269	6.53543	6.60845	6.66616	6.55109	6.66273	6.64193	6.59993	6.67337	6.59509	6.58699	-0.0538175	0.19641	-0.00991394	0.829556	0.0163817	0.647206
ILMN_1654287	ADCY9	6.94351	6.81628	6.88404	6.8717	6.88048	6.9069	6.87062	6.8817	6.88079	6.89143	6.81686	6.90945	0.00869123	0.860568	0.0137792	0.672381	0.0051211	0.866419
ILMN_1654288	LOC652540	6.5615	6.54319	6.58986	6.59968	6.52281	6.52529	6.55475	6.64193	6.57291	6.50625	6.57884	6.58911	0.00678527	0.828809	-0.00880451	0.82018	0.0318001	0.441059
ILMN_1654289	ELK1	8.7777	8.8022	9.03929	8.8689	8.82519	8.71245	8.94199	8.67165	8.82376	8.83426	8.8219	8.65331	0.103242	0.367885	0.0323602	0.687162	0.0426431	0.68477
ILMN_1654313	LOC730995	6.7289	6.73535	6.64086	6.66734	6.69451	6.73343	6.78597	6.64746	6.87482	6.67618	6.85344	6.64639	-0.0236343	0.757427	-0.0269076	0.710182	0.0440796	0.658496
ILMN_1654317	LOC643224	6.57884	6.62121	6.61681	6.65369	6.61681	6.63784	6.64193	6.67018	6.55193	6.61301	6.67971	6.57757	-0.0178116	0.616184	0.012682	0.71031	-0.00208293	0.96646
ILMN_1654318	PTPN23	7.06185	7.07233	7.1784	7.10662	7.10849	7.01783	7.05529	7.21586	7.05817	6.94351	7.11715	7.07107	0.060282	0.398886	0.0337371	0.603551	0.0658643	0.425109
ILMN_1654319	HAPLN3	6.60735	6.72323	6.60191	6.53207	6.65428	6.64206	6.60401	6.68474	6.55959	6.62194	6.60969	6.64639	0.0181567	0.680829	-0.0165369	0.702789	-0.0098915	0.808388
ILMN_1654320	LOC644250	10.576	10.615	10.2675	10.4107	10.3044	10.5068	10.5367	10.3387	10.413	10.5465	10.5026	10.5629	-0.0510995	0.670179	-0.130017	0.100711	-0.1078	0.149302
ILMN_1654322	ATP1B3	7.78007	7.76483	7.90639	7.85514	7.89472	7.90043	7.85875	7.97024	8.12316	8.02192	8.24656	8.10681	-0.307999	0.0178412	-0.241665	0.022639	-0.141046	0.234348
ILMN_1654323	UBE3A	6.64278	6.63772	6.60624	6.63191	6.69451	6.63506	6.69532	6.66106	6.60587	6.70262	6.58774	6.60956	-0.00439428	0.911264	0.0205243	0.64046	0.020778	0.660067
ILMN_1654324	HEYL	7.23472	7.12749	7.31632	7.14462	7.19367	7.11625	7.19186	7.01792	7.38454	7.14072	7.14215	7.16673	0.0763091	0.23989	0.00164828	0.948832	0.0482439	0.673236
ILMN_1654331	HOXB4	8.22701	8.18212	8.23125	8.2558	8.10515	8.03611	8.26321	8.18512	8.41849	8.27806	8.17523	8.27135	-0.0280869	0.487261	-0.109192	0.208381	0.0473942	0.567685
ILMN_1654336	LOC644377	6.57884	6.55116	6.58185	6.63772	6.61681	6.67337	6.60104	6.64602	6.70883	6.66071	6.56481	6.61264	-0.0421033	0.224799	0.0299127	0.405912	0.0392458	0.400464
ILMN_1654340	UGP2	6.69775	6.61558	6.60772	6.69718	6.63179	6.62961	6.69248	6.63494	6.65809	6.61478	6.56036	6.6003	0.0485379	0.216109	0.0610473	0.0906332	0.0700234	0.0398786
ILMN_1654346	LOC644325	6.56874	6.63772	6.64968	6.50994	6.61546	6.63095	6.57657	6.6307	6.6029	6.60142	6.60389	6.63021	0.00687178	0.810653	-0.0263898	0.536897	-0.00844821	0.665676
ILMN_1654354	GNAT3	6.62682	6.58498	6.56099	6.61116	6.57026	6.62828	6.63482	6.57971	6.50247	6.5331	6.59659	6.62536	0.0059168	0.867831	0.0182186	0.602127	-0.0126793	0.800989
ILMN_1654357	ZNF24	6.85914	6.81388	6.85944	6.93034	6.92469	6.8581	6.76856	6.7385	6.63155	6.6495	6.79475	6.80144	0.0955881	0.138913	0.155811	0.0465401	-0.0356937	0.610526
ILMN_1654365	LOC440742	6.6658	6.61558	6.59273	6.63337	6.59894	6.66	6.62754	6.57663	6.64169	6.65678	6.68975	6.55385	-0.00875459	0.859144	-0.00269175	0.95475	-0.0181692	0.709736
ILMN_1654369	LOC644224	6.61214	6.70042	6.61091	6.60845	6.72504	6.58361	6.69114	6.61668	6.73072	6.55896	6.62127	6.60808	0.0450557	0.269479	0.0429324	0.41757	0.0834114	0.0957637
ILMN_1654370	TESK2	7.0881	7.21014	7.16564	7.06123	7.06696	7.1247	7.25013	7.01515	7.03186	7.2086	7.05076	6.99705	0.0691568	0.396018	-0.00117318	0.986798	0.0135798	0.897313
ILMN_1654378	LOC642110	6.51862	6.60636	6.57582	6.59671	6.62096	6.62961	6.62169	6.60895	6.58047	6.71925	6.54125	6.60476	-0.0548178	0.398718	-0.00599017	0.915464	-0.0180471	0.752771
ILMN_1654385	ASB13	6.81548	6.73026	6.83307	6.81382	6.8244	6.92418	6.70883	6.91477	6.85944	6.79821	6.82058	6.87875	-0.0395763	0.376302	0.0216235	0.638194	-0.00483159	0.945198
ILMN_1654386	C14orf182	6.61386	6.58047	6.66415	6.66285	6.64842	6.65345	6.69532	6.64061	6.66533	6.63349	6.68672	6.72924	-0.063655	0.159263	-0.028245	0.370469	-0.01606	0.641083
ILMN_1654389	LOC728744	6.64278	6.63167	6.59757	6.56125	6.62377	6.57291	6.63482	6.5629	6.63155	6.62742	6.59373	6.51311	0.0459218	0.277216	0.00789391	0.849359	0.0316732	0.485201
ILMN_1654392	KHNYN	7.38398	7.29105	7.29059	7.27955	7.30562	7.34201	7.50417	7.49852	7.38368	7.36486	7.35548	7.43087	-0.0618632	0.188558	-0.0746768	0.0666217	0.0783878	0.162622
ILMN_1654394	LOC648576	6.59048	6.64494	6.56099	6.65892	6.669	6.53583	6.6538	6.5643	6.64602	6.50094	6.54305	6.55704	0.0651269	0.0942844	0.0875687	0.129751	0.087695	0.0575988
ILMN_1654396	ITGB2	6.84396	6.95631	7.17047	6.9064	6.95302	6.99045	7.05889	7.03753	6.96054	6.91373	6.99691	7.03063	0.00982335	0.927821	-0.0304637	0.512197	0.0385663	0.447274
ILMN_1654398	RGL1	7.15133	7.09681	7.10335	7.07623	7.09004	7.06041	7.13675	7.10449	7.11706	7.14796	6.95533	7.09917	0.0496779	0.456445	0.00807336	0.896814	0.051945	0.425289
ILMN_1654402	IL18BP	6.68777	6.63627	6.65117	6.66994	6.74254	6.6613	6.59621	6.58386	6.72663	6.60587	6.55244	6.62864	0.0627571	0.0828765	0.0956147	0.049264	0.0399188	0.477143
ILMN_1654403	LOC649186	6.79042	6.75071	6.75338	6.73648	6.78444	6.72562	6.81819	6.74097	6.80606	6.88079	6.81051	6.90945	-0.102077	0.0334248	-0.118069	0.0267327	-0.0785083	0.107249
ILMN_1654408	TRAF7	6.60439	6.56049	6.70757	6.73252	6.59323	6.61852	6.70584	6.73162	6.60587	6.68438	6.79918	6.70607	-0.10573	0.132241	-0.0817854	0.214288	-0.0487663	0.401953
ILMN_1654411	CCL18	6.61043	6.62437	6.61815	6.64061	6.7459	6.57468	6.62608	6.74501	6.62231	6.56226	6.6376	6.65547	-0.000791445	0.979424	0.0352898	0.572334	0.0460268	0.404085
ILMN_1654413	C10orf108	6.58448	6.57619	6.62864	6.66023	6.63179	6.59248	6.65535	6.67818	6.62231	6.63796	6.74478	6.59857	-0.0640007	0.241693	-0.0322732	0.537328	-0.00849008	0.864276
ILMN_1654414	ACSL3	6.68508	6.74647	6.76899	6.70986	6.73783	6.76899	6.69683	6.72788	6.72924	6.72334	6.70492	6.8263	-0.0180047	0.711528	-0.0126249	0.775873	-0.0335361	0.440732
ILMN_1654415	PTF1A	6.69903	6.82175	6.67524	6.57013	6.52555	6.59683	6.64326	6.53595	6.61766	6.62742	6.74478	6.72777	0.0320164	0.612233	-0.13582	0.0321104	-0.101032	0.107523
ILMN_1654421	MPHOSPH9	7.26732	7.38771	7.285	7.50407	7.4732	7.48894	7.24652	7.26638	7.03063	7.24495	7.26693	7.36362	0.0215102	0.702048	0.196904	0.00630936	-0.110657	0.257312
ILMN_1654422	ACTN2	6.61214	6.50935	6.52032	6.71273	6.61129	6.48466	6.52065	6.54808	6.57582	6.54551	6.56849	6.6664	-0.0461952	0.402286	0.00942616	0.906876	-0.0452869	0.324446
ILMN_1654427	LOC653217	6.6195	6.54981	6.57733	6.53051	6.66249	6.63216	6.6495	6.59857	6.52359	6.65237	6.59968	6.54885	-0.0180853	0.642767	0.00808567	0.879036	-0.00974615	0.846574
ILMN_1654429	C12orf48	6.6195	6.64061	6.60932	6.81382	6.62377	6.75227	6.60845	6.70469	6.63312	6.58961	6.67242	6.671	-0.0212017	0.503578	0.0856126	0.241466	0.00441011	0.917052
ILMN_1654430	LOC731170	6.62377	6.53867	6.53362	6.65237	6.65964	6.49309	6.73388	6.65678	6.62389	6.60439	6.66225	6.60327	-0.0579465	0.174458	-0.0216034	0.727235	0.0482146	0.272994
ILMN_1654436	ZNF251	6.62961	6.61558	6.74937	6.70273	6.64193	6.51888	6.67912	6.57544	6.62389	6.67618	6.71296	6.62864	-0.00773818	0.882093	-0.0514106	0.435104	-0.0464443	0.295631
ILMN_1654441	OAT	8.93983	8.61344	8.72966	8.73256	8.877	8.68683	8.63956	8.788	8.64716	8.80905	8.83134	8.6761	-0.0111885	0.921829	-0.00670146	0.933142	-0.08059	0.303978
ILMN_1654445	LOC347292	9.42285	9.15189	9.37746	9.13795	9.12974	9.09597	9.51747	9.58225	9.54502	9.29748	9.20098	9.49379	-0.013349	0.916903	-0.209532	0.0739096	0.217495	0.0691889
ILMN_1654452	LOC441378	6.71462	6.75472	6.75605	6.75093	6.75093	6.83727	6.71776	6.72436	6.77482	6.82451	6.74478	6.64639	0.00323765	0.954457	0.0411532	0.523948	0.000423548	0.994179
ILMN_1654457	TXN2	6.83884	7.04051	6.88272	6.84062	6.9116	6.98117	6.91329	6.83474	6.85546	6.94526	6.87087	6.96366	-0.00590773	0.934449	-0.0154679	0.770316	-0.0587665	0.185867
ILMN_1654458	FLJ37587	6.57884	6.65976	6.60042	6.629	6.57165	6.55691	6.59061	6.59447	6.55959	6.61018	6.61558	6.64794	-0.011563	0.689577	-0.0387147	0.195678	-0.0430128	0.0562044
ILMN_1654459	SPANXN1	6.56874	6.54022	6.57443	6.57443	6.55998	6.61411	6.60401	6.4856	6.58649	6.59993	6.56659	6.55538	-0.0128371	0.493603	0.00887335	0.694325	-0.0152664	0.717118
ILMN_1654466	PLAC4	6.69219	6.60463	6.72152	6.68485	6.72913	6.46358	6.76138	6.71913	6.67701	6.629	6.70895	6.60179	0.0262029	0.611374	-0.0207238	0.825794	0.0725955	0.14632
ILMN_1654468	ACRV1	6.71462	6.84041	6.79183	6.8126	6.76005	6.69486	6.77285	6.72924	6.63312	6.80348	6.73783	6.79475	0.00359881	0.935855	-0.0228541	0.596481	-0.0669502	0.220254
ILMN_1654473	ZP1	6.53284	6.58047	6.60463	6.59534	6.53323	6.66308	6.64049	6.53595	6.61301	6.70135	6.65797	6.62231	-0.0878965	0.0475137	-0.0633279	0.222707	-0.0640602	0.173593
ILMN_1654474	LOC643918	6.63118	6.57316	6.53543	6.68076	6.57468	6.57165	6.60993	6.49069	6.60587	6.61607	6.64938	6.66474	-0.0634698	0.112773	-0.0343682	0.42407	-0.0745672	0.147846
ILMN_1654479	GML	6.65547	6.64061	6.58986	6.59074	6.53011	6.48466	6.59348	6.5811	6.63155	6.68438	6.69787	6.59061	-0.0289746	0.500277	-0.122454	0.0550133	-0.0555807	0.207368
ILMN_1654488	UTX	7.16956	7.11344	7.20371	7.2572	7.34186	7.3225	7.00277	7.10809	7.06629	7.05176	7.13671	7.07401	0.0747407	0.11065	0.219695	0.00368274	-0.028445	0.514319
ILMN_1654493	LOC649169	7.26732	7.32291	7.41974	7.3913	7.39761	7.42629	7.55146	7.37734	7.59917	7.46831	7.35642	7.58091	-0.13189	0.168794	-0.0634777	0.388632	0.0407799	0.685275
ILMN_1654496	LOC646168	6.56303	6.59558	6.6569	6.63033	6.58761	6.58072	6.55014	6.52229	6.59534	6.52215	6.60389	6.62084	0.0228768	0.607084	0.0172603	0.640226	-0.0263749	0.517106
ILMN_1654497	ATAD1	8.4022	8.40836	8.33741	8.42709	8.62987	8.4697	8.02646	8.21258	7.81775	8.22701	8.25626	8.14192	0.174262	0.013287	0.300489	0.0131032	-0.189467	0.186811
ILMN_1654504	CLEC7A	6.61386	6.54486	6.52032	6.58486	6.53932	6.52529	6.53167	6.60327	6.61301	6.57443	6.59659	6.53777	-0.00991091	0.77783	-0.0197728	0.470736	0.0130564	0.693904
ILMN_1654516	TMEM120A	7.88336	7.99329	7.94482	7.93549	7.85633	8.00358	8.0586	8.04769	8.11316	8.20215	8.09161	8.07375	-0.182009	0.0237342	-0.190702	0.0310903	-0.0493511	0.334109
ILMN_1654518	LRCH4	7.68687	7.70016	7.59418	7.5549	7.46851	7.56377	7.67358	7.47004	7.57796	7.5498	7.45819	7.49481	0.159467	0.0201564	0.0281281	0.52459	0.0729263	0.321684
ILMN_1654522	LOC255620	6.61681	6.61558	6.52921	6.8112	6.72243	6.60845	6.57026	6.69671	6.61301	6.6029	6.56849	6.70745	-0.0390811	0.4851	0.0877494	0.290108	0.000378225	0.994926
ILMN_1654526	LOC645724	6.57393	6.6435	6.58674	6.58924	6.68064	6.62718	6.63892	6.64746	6.56849	6.6495	6.5509	6.671	-0.0224107	0.627524	0.00855204	0.860055	-0.00550893	0.90775
ILMN_1654534	NPSR1	6.74501	6.69903	6.7063	6.69428	6.64842	6.68333	6.60993	6.76569	6.78237	6.76602	6.84439	6.7149	-0.0583241	0.22108	-0.0997607	0.0677011	-0.0557737	0.449344
ILMN_1654540	SEMA6D	6.62682	6.67923	6.69114	6.64794	6.72504	6.61705	6.59348	6.64458	6.67701	6.65809	6.69498	6.68485	-0.0135779	0.580618	-0.0159622	0.66267	-0.0409543	0.199668
ILMN_1654541	ATP6V1G2	6.82334	6.77032	6.78352	6.75439	6.80745	6.77482	6.89959	6.79475	6.8263	6.80456	6.87425	6.83138	-0.0443365	0.160917	-0.0578399	0.0859775	0.0034865	0.929645
ILMN_1654542	C5orf21	8.52129	8.78561	8.48264	8.42624	8.37874	8.34692	8.41006	8.3285	8.22652	8.61612	8.41475	8.46716	0.097169	0.437212	-0.115374	0.148491	-0.177652	0.0915378
ILMN_1654543	MED6	10.5339	10.4844	10.6001	10.6578	10.6351	10.5716	10.6339	10.525	10.4666	10.5888	10.4488	10.4337	0.0490128	0.457505	0.131063	0.0782205	0.0513751	0.501244
ILMN_1654545	CPSF1	9.48202	9.4576	9.45552	9.49515	9.38003	9.42847	9.61741	9.06686	9.50671	9.63751	9.38923	9.5629	-0.0648324	0.430666	-0.0953304	0.303275	-0.132886	0.509078
ILMN_1654552	MRPS31	8.57169	8.60736	8.45899	8.7387	8.60973	8.63189	8.61207	8.73854	8.58297	8.55742	8.65129	8.69331	-0.0879945	0.217048	0.0260952	0.668488	0.0105191	0.874309
ILMN_1654560	TLR6	6.67947	6.76049	6.61534	6.77658	6.74725	6.74355	6.66273	6.61926	6.78237	6.59111	6.64938	6.68205	0.0442562	0.423628	0.114948	0.015828	0.0472719	0.442714
ILMN_1654563	EFNB1	6.75584	6.84579	6.80284	6.82525	6.69591	6.9041	6.85095	6.9639	6.88394	6.80348	6.81899	6.8175	-0.0118365	0.677581	-0.0049064	0.939646	0.086269	0.0636368
ILMN_1654566	HSPA1L	7.15604	7.25116	7.19489	7.26887	7.10082	7.17563	7.18949	7.15969	7.17463	7.16388	7.18982	7.19072	0.0192231	0.543414	0.000297529	0.995483	-0.00686966	0.606476
ILMN_1654570	TEKT1	6.73128	6.71204	6.7133	6.72198	6.70883	6.7376	6.93127	6.74736	6.72095	6.78171	6.7459	6.79183	-0.054278	0.023628	-0.0503468	0.0361161	0.0267106	0.712903
ILMN_1654571	FCHO1	7.03063	6.83758	6.91458	6.88881	6.89456	6.89143	7.03995	6.96965	7.08085	7.03063	6.98326	6.92606	-0.0523886	0.457238	-0.0883849	0.0432666	0.0501667	0.321349
ILMN_1654583	CHD1	8.78453	8.82885	8.5376	8.92345	8.86138	8.90994	8.64222	8.49552	8.25785	8.79267	8.73595	8.81914	-0.0655931	0.523185	0.115674	0.0201441	-0.317384	0.050414
ILMN_1654586	RASA3	6.9845	7.07951	6.93	7.09238	7.06329	7.02952	7.12001	7.11724	7.16685	7.12534	7.07938	7.06848	-0.0930644	0.118979	-0.0293383	0.308497	0.0436294	0.139693
ILMN_1654588	LOC644577	6.62682	6.6435	6.6483	6.5643	6.72015	6.63929	6.59348	6.64746	6.61153	6.63506	6.57745	6.57153	0.0448594	0.102766	0.0465675	0.39882	0.0228102	0.425534
ILMN_1654594	SLC34A2	6.6613	6.79183	6.74097	6.70411	6.72141	6.63651	6.72799	6.67018	6.72255	6.73139	6.61264	6.69718	0.0509645	0.381302	0.00694006	0.881721	0.0265011	0.542092
ILMN_1654598	IQCA1	6.57222	6.56049	6.57884	6.6029	6.63747	6.55256	6.59621	6.57663	6.58924	6.61301	6.5509	6.56696	-0.0064401	0.756224	0.0206909	0.539637	0.0104048	0.621447
ILMN_1654602	SDHALP1	6.73535	6.78803	6.79183	6.68076	6.75093	6.67337	6.77142	6.67018	6.70883	6.72062	6.77701	6.8348	-0.00573852	0.886287	-0.0757897	0.139665	-0.0606645	0.242138
ILMN_1654606	ZDHHC22	6.61043	6.6273	6.60772	6.63772	6.67923	6.63216	6.7792	6.64314	6.68731	6.77909	6.7063	6.70146	-0.113803	0.0116621	-0.0792461	0.0531825	-0.0257346	0.615243
ILMN_1654609	TIGA1	10.0554	9.90211	9.93544	10.0546	10.2242	9.91226	10.2032	10.1822	10.2806	9.98548	10.1009	9.9445	-0.0459614	0.524615	0.0534094	0.626841	0.211702	0.0189225
ILMN_1654612	ZNF589	6.87456	6.84579	6.87159	6.91776	6.88485	6.84939	6.80928	6.92902	6.76899	6.78291	6.94087	6.96482	-0.0322174	0.606921	-0.0122005	0.849734	-0.0604372	0.463312
ILMN_1654613	THRA	6.66852	6.74097	6.6256	6.77115	6.62499	6.76899	6.82916	6.7459	6.75104	6.7385	6.61116	6.63349	0.0173153	0.754584	0.0606618	0.385276	0.114321	0.0742553
ILMN_1654626	LOC644727	6.66285	6.63021	6.69265	6.64794	6.57316	6.54962	6.64326	6.63494	6.63578	6.69277	6.66947	6.60476	0.00623683	0.854575	-0.0654257	0.174236	-0.0176734	0.540766
ILMN_1654629	TMEM175	8.43257	8.58139	8.34025	8.33896	8.38276	8.44695	8.57223	8.3854	8.586	8.48054	8.55518	8.49393	-0.0584817	0.473048	-0.120333	0.036385	0.00465745	0.949167
ILMN_1654630	FAM193B	6.93539	7.04051	6.92469	6.91776	6.95186	6.99508	6.99526	6.94837	6.85407	6.96477	6.95533	6.97156	0.00297537	0.940174	-0.00899093	0.71417	-0.0313226	0.495162
ILMN_1654632	RGS7BP	6.61043	6.67524	6.52202	6.74825	6.6347	6.7063	6.50532	6.62791	6.64314	6.58197	6.69079	6.58223	-0.0157671	0.796852	0.0780824	0.187043	-0.0262093	0.667967
ILMN_1654634	LOC652278	6.58147	6.61815	6.61534	6.69996	6.63615	6.69114	6.63892	6.61803	6.51297	6.68847	6.65511	6.56494	-0.0311861	0.465858	0.039578	0.398879	-0.0461978	0.437861
ILMN_1654637	SETD5	6.88211	6.93235	7.00268	6.9845	6.86908	6.92606	7.01459	7.16856	6.89617	6.92122	7.00726	7.14029	-0.0838788	0.312768	-0.0963775	0.251226	0.00351575	0.973999
ILMN_1654639	HERC6	8.18219	8.12512	8.17421	9.18871	9.38594	9.20098	8.70345	8.65849	8.19707	7.93906	7.94257	7.72728	0.290871	0.0166299	1.38891	0.000130475	0.650035	0.0212604
ILMN_1654641	LOC642521	6.56595	6.59098	6.52202	6.57291	6.51823	6.54962	6.5977	6.61214	6.56849	6.55743	6.55845	6.66	-0.0323024	0.459847	-0.0450358	0.296345	0.000822074	0.983047
ILMN_1654653	KLC1	9.1594	9.4401	9.35984	9.27303	9.12316	9.25976	9.13795	9.02387	9.26542	9.11365	9.12501	9.11425	0.202141	0.0728147	0.101012	0.103349	0.0247762	0.740763
ILMN_1654663	LOC642843	6.70895	6.67383	6.59584	6.69718	6.57606	6.69753	6.72799	6.74501	6.7242	6.61018	6.67689	6.59546	0.0320275	0.485994	0.0294136	0.569782	0.104891	0.0153931
ILMN_1654671	SLMO1	7.35562	7.25357	7.18949	7.27646	7.15133	7.28562	7.42535	7.19088	7.52036	7.18437	7.24495	7.20098	0.0561293	0.338162	0.0277056	0.586724	0.168764	0.165319
ILMN_1654672	LOC641950	6.58448	6.71473	6.54448	6.62011	6.57026	6.68754	6.59061	6.57971	6.59993	6.55589	6.58774	6.63021	0.0232828	0.697533	0.0346884	0.437151	-0.0011968	0.959784
ILMN_1654673	LOC442208	6.70607	6.63167	6.77269	6.62011	6.76823	6.65726	6.72799	6.59447	6.65964	6.70135	6.6594	6.66	0.029893	0.525488	0.00828448	0.867566	-0.0128809	0.768957
ILMN_1654677	RAD9B	6.79475	6.70492	6.57733	6.62596	6.56874	6.68614	6.66746	6.72152	6.6988	6.67483	6.70762	6.78716	-0.0308752	0.687533	-0.0962608	0.112931	-0.0272782	0.500226
ILMN_1654685	MCTP1	7.0632	7.09304	7.12479	7.0341	7.09865	7.02737	7.02659	7.06095	7.01589	7.1023	7.04604	7.03657	0.0320324	0.303412	-0.00826464	0.800532	-0.0271643	0.331605
ILMN_1654689	ZNF197	7.13722	7.15781	7.01256	7.16673	7.23546	7.08502	7.17263	7.18058	6.9455	7.09987	7.02714	7.04669	0.0446307	0.42515	0.104502	0.0980032	0.0416723	0.630255
ILMN_1654690	CECR5	9.59564	9.54114	9.61638	9.6663	9.45155	9.59724	9.76538	9.37418	9.66865	9.39828	9.44485	9.36314	0.182298	0.00502306	0.16961	0.0660595	0.200646	0.169821
ILMN_1654691	FKBP3	7.59631	7.69432	7.76834	7.65404	7.68355	7.65512	7.84526	7.81017	7.63245	7.89706	7.85401	7.95338	-0.215159	0.0201263	-0.237245	0.00144559	-0.138853	0.125568
ILMN_1654692	RALGPS2	6.50849	6.60327	6.61962	6.58185	6.73151	6.57013	6.60697	6.65964	6.62864	6.73703	6.65666	6.52529	-0.0625343	0.426818	-0.0118326	0.890478	-0.00791232	0.906963
ILMN_1654696	C15orf48	6.88607	6.80036	6.77406	6.85551	6.85344	6.82472	6.79616	6.9093	6.80885	6.8522	6.93534	6.91736	-0.0814688	0.125793	-0.0570744	0.10333	-0.0635294	0.220572
ILMN_1654697	ZNF280B	7.14386	7.12406	7.05862	7.17185	7.17201	7.13108	7.07338	7.14774	6.86758	7.00277	7.00847	6.91736	0.132646	0.0275448	0.182113	0.00495913	0.0533693	0.580313
ILMN_1654703	GPR157	6.79042	6.95186	6.90541	6.78499	6.84078	6.83169	6.9108	6.73038	6.88795	6.94156	6.82196	6.78248	0.0338984	0.643085	-0.0295118	0.5928	-0.00562441	0.943209
ILMN_1654721	LOC645836	6.69068	6.60956	6.70757	6.63627	6.70365	6.69486	6.70135	6.63203	6.68193	6.62608	6.67971	6.62231	0.02657	0.495528	0.0355589	0.274704	0.0290702	0.35387
ILMN_1654722	MPV17L	6.73128	6.66545	6.74691	6.73985	6.80745	6.77384	6.75299	6.83601	6.75227	6.66189	6.74478	6.85043	-0.0378254	0.562625	0.0213426	0.731295	0.0280549	0.670605
ILMN_1654726	LOC645797	6.56449	6.58949	6.63572	6.62316	6.57316	6.57468	6.57468	6.61803	6.58223	6.52698	6.59659	6.62084	0.0150955	0.688666	0.00886304	0.798996	0.0101741	0.760296
ILMN_1654732	OSR2	6.57884	6.54164	6.69265	6.58786	6.63033	6.65726	6.71913	6.62791	6.56112	6.52045	6.69382	6.62706	-0.00939899	0.896614	0.0113738	0.844535	0.0222789	0.760162
ILMN_1654735	SLCO3A1	6.74097	6.68951	6.76105	6.7757	6.81254	6.68205	6.6736	6.61803	6.65666	6.64266	6.75244	6.67389	0.0408491	0.353935	0.0670986	0.256634	-0.0402315	0.332976
ILMN_1654737	TRIM32	8.15919	8.09443	8.15998	8.012	8.02848	7.90456	7.91375	7.88035	8.00321	7.85117	7.902	7.99179	0.222883	0.00868978	0.0666946	0.303708	0.0174501	0.76729
ILMN_1654742	GJD4	6.70192	6.68205	6.53362	6.62596	6.64193	6.71456	6.55819	6.76171	6.70745	6.62341	6.63337	6.57908	0.0272441	0.650115	0.048866	0.201039	0.0638322	0.368909
ILMN_1654759	CLDN22	6.69219	6.59248	6.61815	6.72562	6.69068	6.76138	6.68205	6.68602	6.79746	6.69277	6.76094	6.74097	-0.0972875	0.0543595	-0.00566728	0.85329	-0.00971975	0.831853
ILMN_1654766	NHEDC2	6.65702	6.73962	6.72152	6.61558	6.53011	6.55538	6.71159	6.59857	6.65511	6.68193	6.63021	6.78368	0.00744755	0.892178	-0.131581	0.0637001	-0.0435181	0.4779
ILMN_1654771	LOC647958	6.68649	6.76349	6.78193	6.82906	6.85344	6.76531	6.79292	6.80655	6.75227	6.89748	6.81051	6.95302	-0.143032	0.0478738	-0.0710638	0.221316	-0.103089	0.0817211
ILMN_1654772	LOC651511	6.59509	6.71341	6.71193	6.79497	6.67277	6.58072	6.70135	6.64998	6.64458	6.59111	6.59509	6.72924	0.0349965	0.590855	0.0443386	0.595041	0.0268213	0.612294
ILMN_1654773	CASK	7.11314	6.99357	7.18949	7.12706	7.16789	7.17785	7.012	7.00614	7.06024	7.06561	7.06445	7.19186	-0.00857553	0.909662	0.0502925	0.326732	-0.081182	0.149766
ILMN_1654778	LSP1	6.73128	6.57619	6.565	6.63337	6.63033	6.67159	6.62169	6.53595	6.59385	6.61153	6.64783	6.64326	-0.0100483	0.863576	0.0108918	0.567572	-0.0503732	0.143255
ILMN_1654779	LOC645355	6.70469	6.56366	6.74691	6.72448	6.70883	6.71033	6.63482	6.5811	6.61301	6.66189	6.69382	6.688	-0.0094828	0.874339	0.0333091	0.0389584	-0.0715949	0.0177737
ILMN_1654786	TRIM6	6.60587	6.54981	6.59273	6.54756	6.54654	6.55845	6.56443	6.57064	6.58649	6.51389	6.52366	6.57013	0.0469084	0.125039	0.0149543	0.447235	0.0379583	0.110159
ILMN_1654792	C8orf15	6.59173	6.60636	6.60624	6.67136	6.57884	6.59385	6.68485	6.74501	6.61913	6.70825	6.7063	6.69718	-0.102469	6.60677e-05	-0.0892317	0.0365431	-0.020911	0.597475
ILMN_1654812	UNC93B1	6.75193	6.80165	6.81569	6.78749	6.79616	6.78291	6.63615	6.71021	6.81291	6.63796	6.70895	6.72289	0.0998266	0.0377243	0.0989218	0.0204439	0.0298237	0.63195
ILMN_1654819	ZNF589	6.70895	6.65976	6.75205	6.61399	6.82191	6.80976	6.81963	6.77942	6.75684	6.79183	6.91538	6.78858	-0.125013	0.0650528	-0.0833786	0.352119	-0.0466355	0.364211
ILMN_1654823	MGC70863	6.74501	6.79616	6.8052	6.79918	6.79724	6.89959	6.84292	6.87451	6.8523	6.81548	6.87977	6.84897	-0.0659486	0.0667539	-0.0160723	0.698231	0.00850315	0.703546
ILMN_1654851	FAM134A	7.49634	7.51144	7.53954	7.72304	7.48243	7.55319	7.68144	7.59378	7.76157	7.61321	7.66105	7.62485	-0.117265	0.0036194	-0.0468201	0.555321	0.0458955	0.415267
ILMN_1654854	MURC	6.59993	6.53362	6.56341	6.61399	6.63179	6.65034	6.62169	6.62912	6.61913	6.6465	6.65797	6.57757	-0.0616941	0.122547	0.00468845	0.871571	-0.00403344	0.88099
ILMN_1654855	DCX	6.68777	6.83758	6.68835	6.69277	6.72504	6.68975	6.67066	6.70215	6.66391	6.74097	6.71159	6.73648	0.00822058	0.878988	-0.0271583	0.134951	-0.0507726	0.0271617
ILMN_1654857	LOC645971	6.58285	6.63167	6.633	6.58185	6.65964	6.63651	6.64494	6.65964	6.58786	6.58649	6.55538	6.61104	0.0315395	0.243136	0.0417006	0.212345	0.0465124	0.162175
ILMN_1654858	ZNF818	6.62682	6.67923	6.66568	6.70722	6.73535	6.6645	6.58473	6.58699	6.56849	6.60735	6.50823	6.60179	0.0847895	0.0768753	0.129901	0.0272286	0.00761574	0.827157
ILMN_1654861	ACO2	7.71896	7.73137	7.68885	7.7224	7.80236	7.60239	7.79872	7.74292	7.90708	7.5652	7.82379	7.75168	-0.000493958	0.995255	-0.00450287	0.96502	0.102686	0.32165
ILMN_1654864	C1orf58	6.62828	6.7063	6.58185	6.66142	6.65273	6.65571	6.56582	6.60142	6.53011	6.65678	6.5446	6.59546	0.0398609	0.458887	0.0576716	0.150945	-0.0331651	0.436613
ILMN_1654866	RANBP2	7.10221	7.06642	7.05943	7.13671	7.14215	7.18096	6.92231	7.0674	6.79475	7.19796	7.07169	7.12573	-0.0557735	0.224951	0.0214815	0.612298	-0.203639	0.0789456
ILMN_1654870	LOC648460	6.58874	6.55743	6.58986	6.56278	6.64602	6.64771	6.54371	6.5541	6.62389	6.56049	6.53971	6.65833	-0.00750093	0.853471	0.0326594	0.517605	-0.0122753	0.795886
ILMN_1654871	LOC391574	6.62096	6.53207	6.81793	6.63191	6.60587	6.62401	6.7367	6.5629	6.51297	6.60587	6.59968	6.60956	0.0519498	0.572	0.0155619	0.13167	-0.000844348	0.990669
ILMN_1654875	CLC	6.75828	6.74512	6.79885	6.64494	6.70607	6.68754	6.72221	6.71639	6.67853	6.8298	6.71296	6.75983	-0.000111066	0.997785	-0.088012	0.0840451	-0.0618202	0.166496
ILMN_1654890	LENG8	6.95079	7.06727	7.18471	6.96198	7.07774	6.9564	7.04795	7.20314	7.02815	6.95147	6.92975	7.07	0.0838504	0.355711	0.0149689	0.811774	0.109341	0.195502
ILMN_1654893	SCAMP2	6.85458	6.8497	6.85857	6.9098	6.83253	7.00203	6.87221	6.92793	6.91179	6.91208	6.95297	6.85323	-0.0518128	0.149177	0.008691	0.886008	-0.00212044	0.952349
ILMN_1654895	C9orf14	6.55218	6.69079	6.58986	6.57582	6.63337	6.61141	6.52229	6.63349	6.59534	6.60587	6.58486	6.61264	0.00982463	0.827402	0.00574282	0.774536	-0.017416	0.632354
ILMN_1654899	CT47A6	6.76083	6.75071	6.74512	6.77252	6.8263	6.73083	6.71605	6.77219	6.75684	6.75828	6.70359	6.76735	0.00914824	0.677608	0.0334779	0.381331	0.00528505	0.848978
ILMN_1654900	LOC649851	6.76083	6.71639	6.63572	6.56709	6.68695	6.69625	6.56722	6.70469	6.65511	6.72584	6.64338	6.64326	0.0334883	0.50518	-0.0207294	0.698949	-0.0284877	0.590026
ILMN_1654915	LOC646786	8.19331	8.30683	8.19219	8.09015	8.02698	8.07265	8.00003	8.03809	8.11996	8.07473	8.04987	7.87131	0.232141	0.0356649	0.0646235	0.387954	0.0540563	0.501128
ILMN_1654916	KIF7	6.69219	6.69242	6.80874	6.81515	6.77471	6.83915	6.79875	6.81142	6.80606	6.77373	6.73648	6.7585	-0.0251174	0.566793	0.0534373	0.0694163	0.0491735	0.0125829
ILMN_1654920	HNRPH3	9.57752	9.56069	9.44876	9.67415	9.68335	9.68561	9.47728	9.73927	9.22782	9.6433	9.65301	9.75376	-0.154369	0.0451701	-0.00232441	0.95092	-0.2019	0.254335
ILMN_1654922	LOC642718	6.58874	6.51087	6.59136	6.62011	6.57026	6.62401	6.55819	6.5177	6.54255	6.59558	6.55244	6.50664	0.0120995	0.759011	0.0532399	0.160685	-0.0120757	0.691118
ILMN_1654939	TMED2	9.87648	9.80651	9.95427	9.43766	9.87477	9.60821	9.41264	9.42468	9.40866	9.48268	9.34577	9.40339	0.468478	0.0012997	0.229602	0.159945	0.00471382	0.911824
ILMN_1654942	NFIC	6.78521	6.71913	6.97328	6.72981	6.73535	6.62255	6.72663	6.65678	6.64758	6.70699	6.71422	6.70446	0.117314	0.198444	-0.0126544	0.748433	-0.0315566	0.277554
ILMN_1654945	DNMT3A	6.67665	6.65093	6.6382	6.63627	6.71776	6.63216	6.68789	6.65678	6.61595	6.70825	6.71947	6.64326	-0.0350644	0.253483	-0.0282652	0.483317	-0.0367874	0.308992
ILMN_1654946	ZSCAN18	8.90947	9.02833	8.84267	8.9779	8.76067	8.91074	8.95329	8.76986	8.89211	8.97813	8.84336	8.9026	0.0187959	0.792532	-0.0249263	0.756709	-0.0362746	0.614662
ILMN_1654950	LOC650744	6.71462	6.46521	6.53971	6.66852	6.59472	6.51153	6.50863	6.53024	6.541	6.58348	6.511	6.53284	0.0307395	0.710028	0.049148	0.382754	-0.0158166	0.537517
ILMN_1654965	LOC646804	6.75461	6.77417	6.68975	6.70561	6.74501	6.77263	6.73388	6.73444	6.82164	6.68578	6.82058	6.77153	-0.0197922	0.694897	-0.0182145	0.699684	0.00402246	0.938531
ILMN_1654966	SCARA3	6.52803	6.51455	6.58511	6.52372	6.51717	6.48466	6.60845	6.62912	6.57291	6.57884	6.53971	6.62377	-0.0382073	0.3052	-0.0722552	0.0561633	0.0227229	0.481509
ILMN_1654973	LOC642804	6.65273	6.62267	6.59273	6.60845	6.59061	6.60129	6.62328	6.59447	6.61766	6.55296	6.61852	6.57757	0.0396904	0.198794	0.0171004	0.43676	0.0287867	0.243415
ILMN_1654979	EPHA6	6.72641	6.80981	6.79885	6.85334	6.77471	6.85582	6.68064	6.8765	6.73844	6.79183	6.80295	6.77778	-0.0124956	0.669375	0.0371044	0.25015	-0.0256592	0.683865
ILMN_1654980	OTOA	6.63518	6.63482	6.55512	6.45934	6.63179	6.62828	6.43312	6.56741	6.50459	6.54409	6.58774	6.55064	0.0475498	0.186893	0.0123082	0.843661	-0.0591185	0.223746
ILMN_1654987	HCG2P7	6.67818	6.7033	6.59584	6.64338	6.69591	6.78291	6.63191	6.64602	6.71027	6.64806	6.52019	6.75573	0.0177816	0.825186	0.0660737	0.451632	0.0214084	0.781655
ILMN_1654997	P2RX3	6.58874	6.6273	6.58348	6.5982	6.68064	6.63361	6.64494	6.63494	6.50247	6.67337	6.68392	6.70446	-0.0874098	0.00617222	-0.0497643	0.123423	-0.0931284	0.117537
ILMN_1654998	SMEK1	6.6195	6.57896	6.57291	6.62316	6.66616	6.64206	6.68789	6.76426	6.64025	6.61018	6.64061	6.69718	-0.0588688	0.115697	-0.00553223	0.854873	0.0481394	0.337389
ILMN_1655011	SERF1B	9.26768	9.40063	9.28485	9.31671	9.34353	9.1715	9.56138	9.49937	9.46226	9.63751	9.64169	9.65047	-0.325504	0.00148328	-0.365977	0.00240165	-0.135554	0.00967676
ILMN_1655026	LOC647979	6.62377	6.54164	6.64968	6.70561	6.64055	6.52222	6.56582	6.68998	6.51744	6.58197	6.57594	6.63349	0.00789437	0.842877	0.0256582	0.674349	-0.0060551	0.916936
ILMN_1655039	SLC27A4	6.59341	6.44271	6.63009	6.77252	6.67524	6.62133	6.60845	6.63627	6.55959	6.54834	6.69938	6.51311	-0.0315343	0.716683	0.102756	0.228066	0.0144981	0.824848
ILMN_1655045	LOC728012	6.54255	6.62267	6.55512	6.51258	6.60142	6.59534	6.629	6.59857	6.56278	6.63191	6.61411	6.59061	-0.0387635	0.232934	-0.0424316	0.243519	-0.0154313	0.531683
ILMN_1655046	NUTF2	8.13312	8.3107	8.34361	8.18446	8.18921	8.32199	8.37606	8.51934	8.49718	8.34722	8.40599	8.20908	-0.05829	0.542339	-0.0888791	0.294515	0.14343	0.12242
ILMN_1655047	LOC645848	6.76867	6.63929	6.7255	6.60587	6.66106	6.63095	6.74512	6.72924	6.70883	6.73985	6.68228	6.70607	0.00175602	0.968305	-0.0767737	0.0292724	0.0183335	0.40537
ILMN_1655051	FAM86B1	7.12577	7.09681	7.08965	7.17089	7.10693	7.10204	7.08258	7.2215	7.31549	7.29129	7.20289	7.27638	-0.152778	0.00658672	-0.130236	0.0208187	-0.0503312	0.52823
ILMN_1655052	TRNT1	6.65547	6.77701	6.7367	6.73985	6.72141	6.79734	6.82916	6.72675	6.68193	6.629	6.68543	6.68205	0.0575682	0.224859	0.087373	0.0405411	0.080453	0.163826
ILMN_1655068	TOM1L2	8.22311	8.2342	8.0407	8.3423	8.02192	8.23869	8.28844	7.70744	8.35805	8.08596	8.21384	8.29218	-0.0313236	0.736669	0.00364264	0.975591	-0.0793493	0.730582
ILMN_1655077	PRDM1	6.86357	6.81771	6.80992	6.90721	6.86666	6.87057	6.78051	6.84751	6.77482	6.80863	6.88597	6.82313	-0.00884312	0.775936	0.042236	0.193052	-0.0382936	0.314073
ILMN_1655080	HSPCAL3	6.51021	6.59248	6.59422	6.56861	6.54525	6.55691	6.61141	6.55704	6.58924	6.52698	6.55538	6.63191	-0.00578905	0.896627	-0.0145001	0.674434	0.0144705	0.70116
ILMN_1655086	BNC1	6.67112	6.62437	6.58348	6.65093	6.63033	6.60845	6.59919	6.52399	6.62864	6.59403	6.53802	6.53925	0.0692218	0.0917367	0.0728038	0.0303842	0.0268347	0.499893
ILMN_1655093	LOC727773	6.82752	6.77164	6.77021	6.70883	6.80531	6.73343	6.75127	6.81814	6.75684	6.66462	6.78051	6.83269	0.0305146	0.5965	-0.0100841	0.869273	0.0161392	0.780273
ILMN_1655095	CNGA4	6.65845	6.61558	6.63572	6.57165	6.49243	6.55256	6.6538	6.66622	6.56278	6.61607	6.65082	6.62706	0.00527076	0.759459	-0.0924349	0.0236306	-0.00371512	0.91869
ILMN_1655096	LOC645931	6.73015	6.69509	6.65249	6.59671	6.629	6.68205	6.65535	6.64193	6.63735	6.6632	6.65511	6.65093	0.0361638	0.186983	-0.0204962	0.460607	-0.0115343	0.150198
ILMN_1655100	LOC644680	6.73263	6.73535	6.66273	6.64938	6.65821	6.70146	6.70273	6.60593	6.58786	6.62608	6.54923	6.53433	0.140353	0.019306	0.0998006	0.0378359	0.0622905	0.243758
ILMN_1655114	ABR	6.876	6.81248	6.9475	6.87527	7.00184	6.86738	6.96932	6.9069	6.88911	6.88495	6.98421	6.84475	-0.0259787	0.671712	0.0101911	0.873641	0.0171402	0.739342
ILMN_1655117	WDR19	8.19331	8.19911	7.99803	8.12902	8.03091	8.23069	8.01133	8.07127	7.83173	8.02002	7.97725	7.98124	0.137313	0.111576	0.137369	0.0813331	-0.021394	0.784752
ILMN_1655126	PI4KAP2	8.20127	8.04914	8.07099	7.98751	8.09519	8.18491	7.96066	8.2631	8.27709	8.18264	8.34824	8.26707	-0.15885	0.0778882	-0.17678	0.0764236	-0.0990316	0.433119
ILMN_1655136	FLJ31813	6.64566	6.6538	6.59757	6.63929	6.75561	6.6613	6.73535	6.64061	6.65189	6.71639	6.57884	6.68485	-0.0276811	0.572968	0.0253753	0.667426	0.0159241	0.7714
ILMN_1655137	ZCCHC11	7.81206	7.67669	7.69879	7.65404	7.85437	7.80247	7.61051	7.75291	7.53399	7.7103	7.72637	7.63323	0.0392089	0.483559	0.0803252	0.293945	-0.0574974	0.459273
ILMN_1655140	LOC647656	6.55538	6.59558	6.59906	6.51927	6.55998	6.5541	6.58911	6.53777	6.73535	6.629	6.5509	6.55064	0.00649554	0.837074	-0.0323972	0.326582	0.043894	0.534593
ILMN_1655144	LOC644300	6.58874	6.63929	6.58836	6.59385	6.49935	6.63506	6.69996	6.5177	6.57582	6.57594	6.64061	6.60179	-0.000651367	0.980681	-0.0300282	0.535503	-0.0082884	0.891314
ILMN_1655151	LOC729639	6.7133	6.78183	6.75205	6.69591	6.68951	6.65034	6.68649	6.6307	6.6388	6.57594	6.78193	6.78537	0.0346419	0.655683	-0.0358286	0.638947	-0.0624188	0.431334
ILMN_1655154	PTBP1	12.1872	12.1036	12.0187	11.966	12.2266	12.2241	12.0277	11.9082	12.1334	12.1116	11.8849	11.9035	0.136526	0.193516	0.172273	0.201885	0.0564386	0.593861
ILMN_1655155	PRPS1L1	6.77417	6.76182	6.87384	6.7889	6.8244	6.83789	6.98554	6.87532	6.81877	6.84532	6.86985	6.78858	-0.0313068	0.505564	-0.0175175	0.56752	0.0586297	0.343055
ILMN_1655161	MORN1	6.6483	6.53207	6.62109	6.60439	6.629	6.48104	6.50863	6.50849	6.61766	6.60142	6.58624	6.70307	-0.0297583	0.589236	-0.058768	0.373079	-0.0853138	0.173939
ILMN_1655162	LOC642032	6.58285	6.60636	6.6483	6.69428	6.73659	6.72323	6.60401	6.53932	6.69185	6.71364	6.66225	6.67701	-0.0717959	0.0427426	0.0337313	0.162528	-0.0725763	0.195629
ILMN_1655163	STK24	11.1264	11.1204	11.2038	11.2459	11.0083	11.0415	11.0615	10.9287	10.9573	11.0242	10.8835	10.8409	0.234001	0.0190768	0.18239	0.120372	0.06627	0.388319
ILMN_1655165	RNF138	7.59541	7.70206	7.55128	7.63398	7.91192	7.66436	7.35473	7.49054	7.35419	7.57449	7.45819	7.46734	0.116243	0.116866	0.236749	0.0684944	-0.100189	0.16333
ILMN_1655167	ZNF502	6.49616	6.59098	6.60932	6.58486	6.51113	6.63506	6.61141	6.70607	6.60858	6.58197	6.60969	6.54074	-0.0119783	0.781519	-0.000448697	0.99183	0.0645518	0.162728
ILMN_1655170	LOC646366	6.67818	6.71341	6.61091	6.71788	6.73659	6.77756	6.76856	6.65404	6.64458	6.69149	6.66947	6.71947	-0.0259759	0.479755	0.0505314	0.0910119	-0.00441787	0.92201
ILMN_1655171	PCDHGC5	6.68064	6.61399	6.66852	6.56861	6.64055	6.52372	6.60104	6.59584	6.52842	6.58961	6.58774	6.54242	0.0811284	0.0341125	0.00437277	0.912468	0.0018432	0.950707
ILMN_1655177	PIK4CA	9.50538	9.57839	9.54419	9.55017	9.39367	9.56352	9.63187	9.32808	9.64439	9.50671	9.55035	9.49436	0.0255134	0.399415	-0.0146884	0.809727	0.0176388	0.874507
ILMN_1655190	LOC649044	6.7367	6.75071	6.77269	6.84292	6.74853	6.68614	6.65237	6.73315	6.71353	6.73015	6.7421	6.7516	0.0120805	0.377189	0.0179145	0.716748	-0.0416027	0.172816
ILMN_1655191	CASZ1	6.94077	6.94526	6.92577	7.04437	7.03443	7.0038	7.01626	6.83106	6.95756	6.80981	6.86635	6.88287	0.0842617	0.0211815	0.174525	0.00230343	0.0819522	0.236829
ILMN_1655194	PHF17	7.34864	7.09926	7.4453	7.19661	7.23088	7.28879	7.50339	7.48208	7.46199	7.2698	7.27363	7.38663	-0.0122865	0.916429	-0.0712577	0.202685	0.172464	0.0126826
ILMN_1655195	SMA4	7.34548	7.29969	7.42367	7.285	7.36131	7.31256	7.5174	7.36893	7.34097	7.40929	7.44345	7.45379	-0.0792268	0.109444	-0.115888	0.0112516	-0.0264105	0.663844
ILMN_1655196	FLJ21767	6.66285	6.66415	6.62864	6.61558	6.57316	6.63095	6.63046	6.57229	6.65964	6.5714	6.7063	6.65093	0.00900212	0.836336	-0.0363111	0.443947	-0.0220816	0.661759
ILMN_1655201	C21orf70	6.8402	6.7757	6.76249	6.79118	6.77603	6.81537	6.84991	6.93618	6.91736	6.87752	6.94972	6.92478	-0.124547	0.0176767	-0.12315	0.00690601	-0.0161934	0.655746
ILMN_1655206	ZBTB34	7.03498	7.14681	7.16446	7.19796	7.16167	7.12109	7.06159	6.9898	7.09726	7.11862	7.11215	7.03657	0.0263009	0.615327	0.071122	0.107876	-0.0395667	0.390593
ILMN_1655210	BPY2	6.68777	6.66118	6.53971	6.5177	6.61962	6.63784	6.62328	6.62912	6.61005	6.50267	6.60389	6.60327	0.0596101	0.351998	0.0217761	0.687325	0.0508761	0.210064
ILMN_1655211	LOC644885	6.46704	6.53207	6.60932	6.54255	6.56874	6.56303	6.57026	6.5784	6.65345	6.56049	6.511	6.59857	-0.0205431	0.692538	0.00142208	0.959879	0.0440165	0.29608
ILMN_1655218	NFAT5	6.55998	6.53518	6.60932	6.55666	6.54988	6.67489	6.47402	6.60895	6.6071	6.57001	6.54615	6.53925	0.016355	0.528063	0.0420077	0.370177	0.0115531	0.812613
ILMN_1655225	C19orf25	7.79292	7.80564	7.87661	7.7264	7.79472	7.79987	7.97017	7.87428	7.8598	7.78935	7.93682	7.87932	-0.0434404	0.435614	-0.0948372	0.125102	0.0329188	0.582677
ILMN_1655229	SLC7A11	6.63518	6.64783	6.64086	6.60439	6.63615	6.66994	6.63337	6.58874	6.63155	6.62462	6.65213	6.68345	-0.0121128	0.524288	-0.0165775	0.55013	-0.0355169	0.187918
ILMN_1655230	GPATC4	6.59509	6.56861	6.61091	6.63337	6.7412	6.54962	6.67759	6.57064	6.65046	6.6206	6.69938	6.61104	-0.052132	0.163529	-0.00227911	0.972488	-0.0107747	0.812734
ILMN_1655240	TAS1R2	6.71981	6.76349	6.66568	6.57582	6.76503	6.71033	6.70745	6.63349	6.78237	6.77784	6.75133	6.6664	-0.0155271	0.741592	-0.0481309	0.503194	-0.0240861	0.68169
ILMN_1655241	PURG	6.68777	6.67242	6.70895	6.76083	6.66249	6.69753	6.66118	6.72562	6.58649	6.6465	6.71159	6.7585	-0.0158186	0.667343	0.00141898	0.975478	-0.0477671	0.407624
ILMN_1655244	LOC642755	7.97815	7.96057	7.72235	7.88024	7.75954	7.83052	7.95488	7.73934	8.16656	7.95673	7.97074	7.88525	-0.0505535	0.590864	-0.114138	0.0600548	0.0160209	0.905061
ILMN_1655245	MDM1	6.80713	6.68345	6.70377	6.77909	6.76005	6.8522	6.66746	6.67665	6.70469	6.68193	6.68672	6.8522	-0.00883069	0.902687	0.0568302	0.415486	-0.0573462	0.371924
ILMN_1655250	LOC643429	6.58749	6.60956	6.58185	6.58185	6.64055	6.60685	6.55308	6.6376	6.64758	6.61766	6.61411	6.60179	-0.0182197	0.134379	-0.00143493	0.939191	0.00156671	0.961315
ILMN_1655251	KRTAP3-1	6.55679	6.54654	6.53971	6.56861	6.56722	6.64771	6.51783	6.62231	6.70607	6.57884	6.54125	6.52842	-0.00182549	0.914241	0.0450088	0.215296	0.0659016	0.308335
ILMN_1655261	ERP27	6.58874	6.64206	6.60932	6.51133	6.71502	6.57165	6.57657	6.5811	6.5331	6.77263	6.59509	6.63021	-0.0526089	0.404176	-0.0666491	0.457922	-0.102391	0.143619
ILMN_1655269	C2orf66	6.59659	6.63772	6.66852	6.61705	6.64974	6.5541	6.64794	6.67136	6.57291	6.67054	6.57153	6.62536	0.0118034	0.755556	-0.0155088	0.71852	0.00826432	0.85094
ILMN_1655272	SLC23A2	6.59509	6.60956	6.6671	6.61399	6.61815	6.65189	6.62462	6.53595	6.67853	6.64086	6.6273	6.64025	-0.0122143	0.615022	-0.00812283	0.559897	-0.023097	0.609984
ILMN_1655275	LOC648905	6.54731	6.73026	6.55666	6.52725	6.54216	6.58223	6.57026	6.65404	6.6029	6.66462	6.61116	6.56849	-0.00334705	0.961793	-0.0642122	0.11766	-0.00569031	0.885171
ILMN_1655283	INPP4A	6.53777	6.60796	6.701	6.55321	6.64193	6.55109	6.56722	6.62231	6.48339	6.51744	6.65511	6.50664	0.0558445	0.452834	0.0223494	0.712106	-0.00209246	0.974926
ILMN_1655296	UTRN	6.9079	6.96808	6.94536	6.92902	6.96294	6.92493	6.99375	6.81142	6.79178	6.85603	6.84292	6.79021	0.110725	0.01428	0.109243	0.00959728	0.0359318	0.622072
ILMN_1655306	SAPS2	6.70469	6.63482	6.69405	6.74702	6.7341	6.6671	6.61705	6.59993	6.64458	6.6465	6.66225	6.72777	-0.000990165	0.977527	0.0372345	0.348696	-0.0583195	0.106366
ILMN_1655307	FAM136A	10.0315	10.0158	10.047	10.0582	9.99768	9.92387	9.8352	9.76713	10.0004	9.75181	9.88563	9.91832	0.179532	0.0255617	0.141333	0.0920026	0.0156493	0.864408
ILMN_1655311	LOC145853	7.89138	7.9517	8.04691	8.16748	7.96071	8.07972	8.30755	8.21441	8.28319	8.11242	8.18656	8.28188	-0.230291	0.0260512	-0.124317	0.183648	0.07476	0.255779
ILMN_1655312	HPS5	7.49541	7.40018	7.43307	7.38841	7.52327	7.45505	7.38073	7.37692	7.3198	7.35745	7.26693	7.33511	0.123054	0.0343403	0.135747	0.0460486	0.0393189	0.306973
ILMN_1655316	PSMC6	9.45405	9.48155	9.44876	9.60372	9.87413	9.76443	9.56408	9.64009	9.33127	9.65135	9.84722	9.67829	-0.264172	0.0131394	0.0218039	0.837453	-0.21381	0.127124
ILMN_1655329	RIOK2	7.92145	7.93984	7.79325	8.19879	8.13118	8.12158	7.78018	7.97409	7.72254	7.96227	8.24205	8.05521	-0.201666	0.0992627	0.0640096	0.497009	-0.260903	0.0803998
ILMN_1655330	SPAG11B	6.55998	6.52091	6.58511	6.59385	6.55691	6.55109	6.58611	6.64193	6.52529	6.59708	6.57745	6.57606	-0.0281961	0.228934	-0.0162456	0.339955	0.000915465	0.98002
ILMN_1655334	LOC650628	6.87333	6.69903	6.67524	6.68485	6.63615	6.60537	6.79616	6.7459	6.64602	6.69869	6.67383	6.86388	0.00373476	0.967574	-0.103342	0.181518	-0.0161049	0.838766
ILMN_1655340	RNF181	10.4277	10.448	10.5829	10.5459	10.4998	10.4377	10.6351	10.7642	10.7762	10.6361	10.7265	10.6433	-0.18246	0.0323079	-0.174194	0.0151438	0.056505	0.351948
ILMN_1655341	PLAC8L1	6.75338	6.87768	6.89305	6.99357	6.94448	6.84396	6.98838	6.97066	6.91343	6.96583	6.94087	6.96223	-0.114938	0.0626355	-0.0289696	0.552368	0.00118074	0.962994
ILMN_1655347	SCGB1A1	6.58035	6.70492	6.69544	6.59074	6.58473	6.65034	6.60401	6.69265	6.53621	6.63046	6.6376	6.62864	0.028004	0.523726	-0.0236275	0.325846	-0.0212716	0.663633
ILMN_1655348	GPR1	6.60735	6.67665	6.68356	6.5982	6.61962	6.72323	6.67912	6.65535	6.61913	6.61301	6.64938	6.65093	0.0180831	0.544065	0.00924134	0.830878	0.0134276	0.564288
ILMN_1655365	C2orf77	6.74764	6.89567	6.72663	6.85551	6.78444	6.76767	6.86347	6.82641	6.86512	6.79075	6.90365	6.91924	-0.0812322	0.291102	-0.068673	0.230683	-0.019548	0.668804
ILMN_1655374	SELV	6.73805	6.671	6.60463	6.61705	6.57316	6.61852	6.59919	6.65261	6.68462	6.63796	6.5331	6.58699	0.0852132	0.156951	0.0168984	0.642744	0.0594561	0.20404
ILMN_1655377	MRPS22	10.273	10.249	10.2094	10.5032	10.3497	10.5029	10.4579	10.3488	10.3833	10.4241	10.3093	10.3554	-0.119106	0.0354628	0.0890047	0.218409	0.0337231	0.507012
ILMN_1655380	LOC652517	6.69219	6.5821	6.68672	6.53802	6.701	6.57908	6.65678	6.59036	6.65345	6.67207	6.66947	6.66794	-0.0161576	0.675464	-0.0637933	0.262467	-0.0362977	0.168778
ILMN_1655382	DCLRE1B	6.83253	6.8682	6.75205	6.79118	6.86769	6.9069	6.85883	6.9105	6.86635	6.83632	6.96309	6.85043	-0.0656882	0.281479	-0.0280248	0.622208	-0.00472524	0.918222
ILMN_1655387	PRDM16	6.67383	6.49909	6.63572	6.62011	6.61399	6.64771	6.58611	6.74367	6.58924	6.57884	6.65356	6.61264	-0.012133	0.842605	0.0122552	0.63601	0.0246594	0.684076
ILMN_1655403	LOC730083	6.62682	6.71033	6.671	6.55167	6.62742	6.63651	6.55666	6.65535	6.56278	6.68847	6.57013	6.64639	0.0343869	0.460932	-0.0297916	0.534147	-0.0434001	0.408999
ILMN_1655404	LOC730344	6.48782	6.58811	6.65535	6.50373	6.60993	6.58649	6.59348	6.49069	6.55819	6.61766	6.60117	6.66177	-0.0497736	0.392098	-0.0601507	0.178815	-0.079416	0.0868308
ILMN_1655405	SCARF2	7.26229	7.13176	7.13467	7.03767	7.06405	6.97837	7.11314	7.01325	7.10274	7.02952	7.09615	7.04051	0.120846	0.0645003	-0.0286947	0.429351	0.0209802	0.608665
ILMN_1655408	LOC644023	6.5982	6.59248	6.72277	6.52072	6.55691	6.59534	6.60401	6.57971	6.55359	6.61018	6.65082	6.54885	0.0345347	0.541614	-0.0456252	0.281027	-0.0241783	0.504624
ILMN_1655413	LOC652857	6.62243	6.61693	6.57733	6.59671	6.5366	6.57908	6.55155	6.58223	6.64025	6.54988	6.58348	6.61913	0.0213986	0.43222	-0.0133683	0.644055	0.00717694	0.837536
ILMN_1655414	TNFSF14	6.63675	6.60956	6.52921	6.62462	6.62096	6.59248	6.62035	6.59708	6.58047	6.59993	6.65797	6.56696	-0.0164465	0.714269	0.00440156	0.884649	-0.00898832	0.772151
ILMN_1655418	CAPNS1	11.9264	12.0581	12.2022	12.0251	12.0369	12.1969	12.0026	12.2109	12.1207	12.0187	11.9427	12.0954	0.0432366	0.659583	0.0673398	0.395353	0.0924452	0.28358
ILMN_1655421	LOC338586	6.63118	6.53699	6.6453	6.49523	6.60587	6.52045	6.60562	6.50042	6.61301	6.68578	6.52202	6.66177	-0.0187029	0.775643	-0.0826776	0.24713	-0.0501813	0.46823
ILMN_1655422	RPL17	10.7253	10.7729	10.8092	10.7135	10.7838	10.5184	10.8531	10.72	10.8463	10.8414	11.028	10.8699	-0.143984	0.0839967	-0.241218	0.070228	-0.106664	0.2147
ILMN_1655426	KLK3	6.67112	6.77789	6.6538	6.7636	6.73026	6.64482	6.76724	6.63203	6.78095	6.71227	6.64206	6.58072	0.0559218	0.361355	0.0678782	0.261141	0.0817244	0.250369
ILMN_1655428	LOC442711	6.66994	6.6538	6.58674	6.67842	6.53167	6.59248	6.6736	6.60142	6.63312	6.65809	6.66794	6.58699	-0.000846365	0.982392	-0.036817	0.499326	-0.00162638	0.963017
ILMN_1655429	TNFAIP1	8.33862	8.20022	8.34214	7.87343	8.22444	8.1364	8.12284	8.19973	8.28784	8.28264	8.19359	8.10533	0.0998053	0.223288	-0.115763	0.379224	0.00961296	0.897325
ILMN_1655433	BCKDHB	7.45784	7.36845	7.52962	7.32619	7.50483	7.4051	7.44057	7.44115	7.61069	7.58304	7.49528	7.40014	-0.0408467	0.59311	-0.0807779	0.335748	0.00465247	0.954963
ILMN_1655444	LOC728492	10.793	10.8409	10.6791	10.8262	10.8623	10.8245	10.8476	10.9649	10.8771	10.7705	10.8047	10.921	-0.0610831	0.408097	0.00555528	0.911961	0.0644385	0.325691
ILMN_1655446	XKR6	6.46521	6.48332	6.63009	6.62462	6.66616	6.57468	6.54513	6.61214	6.58047	6.84177	6.56659	6.53433	-0.121355	0.334306	-0.0257419	0.811518	-0.0683175	0.52987
ILMN_1655449	OR5R1	6.59048	6.48882	6.59136	6.62596	6.72243	6.59074	6.72056	6.60735	6.60142	6.5331	6.58624	6.52529	0.00867793	0.835034	0.0981682	0.0883676	0.0948997	0.0931685
ILMN_1655454	LOC645033	6.6029	6.7063	6.61239	6.75205	6.61815	6.66308	6.56125	6.52581	6.68462	6.54988	6.67242	6.58223	0.0390217	0.473155	0.0762492	0.229212	-0.0109478	0.865209
ILMN_1655462	LOC388922	6.59993	6.69636	6.65833	6.71925	6.67665	6.61852	6.70883	6.65678	6.73388	6.63796	6.67971	6.70895	-0.0239981	0.528311	-0.00406405	0.914912	0.0242914	0.472475
ILMN_1655468	DSG3	6.87077	6.64639	6.64386	6.62145	6.65428	6.59683	6.73263	6.58699	6.52842	6.64086	6.59659	6.61411	0.103151	0.247853	0.00700134	0.755997	-0.00117279	0.985828
ILMN_1655469	TSPAN3	8.4949	8.01122	8.06745	8.10038	8.32337	8.28056	8.26597	8.38704	8.68553	8.55967	8.90391	8.87293	-0.58765	0.0354315	-0.544069	0.0136626	-0.332658	0.115957
ILMN_1655474	RNASE9	6.45838	6.68951	6.56341	6.61852	6.54074	6.54061	6.49243	6.50505	6.6256	6.60735	6.59968	6.61104	-0.0355855	0.622941	-0.0393984	0.206586	-0.0649962	0.201559
ILMN_1655479	LOC642660	6.9003	6.83148	6.79345	6.85334	6.83989	6.86058	6.74232	6.93804	6.77647	6.7637	6.84584	6.80874	0.0356488	0.415282	0.0451723	0.139112	0.0128465	0.852656
ILMN_1655482	TRIM27	7.75584	7.62831	7.78757	7.60363	7.577	7.56405	7.75151	7.89327	7.6148	7.51237	7.56349	7.63968	0.152062	0.0676653	0.00971677	0.8145	0.181348	0.10978
ILMN_1655485	C1orf124	7.42619	7.35901	7.20371	7.5318	7.68928	7.62646	7.1686	7.30815	7.18182	7.24644	7.39372	7.23606	0.0375624	0.675266	0.323773	0.009109	-0.0725513	0.343621
ILMN_1655489	FLJ41352	6.51665	6.65093	6.62109	6.52229	6.67665	6.58649	6.6538	6.60593	6.54255	6.6495	6.64938	6.56329	-0.024497	0.648665	-0.0255792	0.655708	-0.0199622	0.667751
ILMN_1655490	LOC728343	7.20065	7.25842	7.1838	7.13108	7.19367	7.15667	7.1855	7.12096	7.1581	7.08572	7.12676	7.17695	0.08448	0.0718065	0.030664	0.392613	0.0250421	0.481918
ILMN_1655497	EIF4B	11.4538	11.4723	11.7026	11.3474	11.5511	11.5026	11.296	11.4326	11.3049	11.2628	11.3049	11.274	0.262362	0.0317172	0.186507	0.0409693	0.0639693	0.235829
ILMN_1655498	FLJ25404	6.99639	7.04904	6.96927	6.98951	6.88048	6.88556	6.9235	6.95186	7.01014	7.02447	6.90241	6.9759	0.0373113	0.429685	-0.0490736	0.383737	-0.00576133	0.901467
ILMN_1655504	IFT81	6.80553	6.77164	6.91776	6.86666	6.89456	6.88363	6.65237	6.71776	6.61913	6.78532	6.7459	6.78716	0.0588462	0.271386	0.10882	0.00228225	-0.109709	0.0264277
ILMN_1655509	ASAH1	6.79345	6.69079	6.79885	6.7636	6.669	6.72062	6.7497	6.70469	6.79475	6.81088	6.75244	6.82895	-0.0363906	0.435711	-0.0796864	0.0899579	-0.0477093	0.241954
ILMN_1655510	LOC642212	6.399	6.45927	6.52032	6.58649	6.50081	6.5615	6.63615	6.56741	6.49563	6.59558	6.58774	6.51311	-0.105947	0.0727966	-0.0158752	0.686657	0.000919121	0.98574
ILMN_1655517	LOC654078	6.65988	6.57316	6.49948	6.73766	6.63337	6.62401	6.68963	6.60895	6.61005	6.70434	6.60241	6.7585	-0.110908	0.163822	-0.0234026	0.709495	-0.0522033	0.380277
ILMN_1655519	LOC645651	6.7289	6.60463	6.68835	6.57582	6.64314	6.61411	6.66273	6.62231	6.53466	6.5714	6.70895	6.60636	0.0450592	0.459836	-0.0178803	0.715252	-0.0223374	0.710205
ILMN_1655521	DMRTA1	6.85914	6.9235	6.9108	6.99912	6.92882	7.0038	6.97599	6.93922	6.99687	6.83359	6.97676	6.83915	0.014645	0.787416	0.0940796	0.148964	0.0875268	0.153425
ILMN_1655525	FLCN	6.75338	6.67923	6.77131	6.71273	6.77471	6.66994	6.76856	6.82376	6.80295	6.80456	6.83106	6.68637	-0.039353	0.496373	-0.0548684	0.366105	0.0244282	0.632771
ILMN_1655529	LOC652803	6.47739	6.52581	6.56659	6.56278	6.53932	6.57468	6.59061	6.55256	6.62096	6.60883	6.65082	6.57908	-0.0896465	0.053761	-0.0539858	0.0810205	-0.024864	0.435381
ILMN_1655532	ASB6	6.54885	6.51087	6.56341	6.63191	6.60439	6.57757	6.65833	6.52868	6.5108	6.52215	6.52529	6.64482	-0.0230445	0.622839	0.0405371	0.402348	0.00185043	0.977464
ILMN_1655537	ING1	6.69775	6.70042	6.78629	6.70146	6.78155	6.68333	6.8263	6.80295	6.70469	6.79183	6.76459	6.68637	-0.0194421	0.674248	-0.0254826	0.591087	0.0303826	0.567753
ILMN_1655545	ZMYND12	6.74937	6.64206	6.51021	6.68205	6.72913	6.7063	6.71021	6.67277	6.7149	6.61018	6.56849	6.50241	0.0735213	0.387821	0.145467	0.0131156	0.138936	0.0151553
ILMN_1655549	SIGLEC10	6.54885	6.46982	6.59136	6.56861	6.53323	6.60845	6.57846	6.46996	6.63735	6.6029	6.53141	6.62231	-0.0488671	0.339297	-0.0154431	0.683153	-0.0236203	0.696267
ILMN_1655551	LOC645690	6.61681	6.60179	6.67806	6.70722	6.77032	6.64771	6.66746	6.52581	6.541	6.70434	6.64938	6.61264	-0.0232337	0.547624	0.0529612	0.29799	-0.0773621	0.212544
ILMN_1655557	INTS6	8.10733	8.36445	8.12371	8.36312	8.31127	8.37526	7.99349	8.09389	7.80626	8.12414	8.18233	8.08704	0.067324	0.485104	0.218712	0.00299407	-0.166624	0.133604
ILMN_1655561	ARPC3	9.13682	9.32331	9.24986	9.13886	9.07807	9.09495	9.4888	9.46672	9.4955	9.5761	9.93992	9.85037	-0.552135	0.0106563	-0.684838	0.00349683	-0.305122	0.0498618
ILMN_1655563	KIAA0427	7.23944	7.22279	7.2336	7.11578	7.24165	7.1838	7.22287	7.28768	7.37002	7.27693	7.28734	7.42297	-0.0971337	0.109213	-0.148667	0.0667611	-0.0355522	0.605154
ILMN_1655564	KIAA1245	6.81393	6.67923	6.65249	6.66852	6.7341	6.62828	6.72958	6.62645	6.5486	6.58498	6.67971	6.688	0.0643217	0.343342	0.0260696	0.594998	-0.0160197	0.80875
ILMN_1655565	UGT3A2	6.541	6.54821	6.58035	6.69869	6.58624	6.64614	6.70745	6.66106	6.64314	6.59248	6.5982	6.59385	-0.038324	0.034951	0.0488481	0.207607	0.0757092	0.0170302
ILMN_1655572	C6orf59	6.69625	6.80553	6.84062	6.75093	6.85344	6.83789	6.79616	6.75684	6.81569	6.85748	6.82196	6.80734	-0.0481282	0.354017	-0.0148384	0.695012	-0.039366	0.159723
ILMN_1655577	TIAM1	6.803	6.82906	6.76756	6.72198	6.75338	6.78007	6.72346	6.81569	6.84783	6.83884	6.79475	6.80144	-0.0118039	0.62742	-0.0598666	0.0507846	-0.0160199	0.707325
ILMN_1655595	SERPINE2	10.0158	10.1946	9.97172	10.2531	10.1114	10.0644	10.0656	9.90718	10.1625	10.1808	10.178	10.1101	-0.0956167	0.254569	-0.013363	0.837909	-0.111217	0.226723
ILMN_1655605	LOC727987	6.78641	6.78183	6.70238	6.80273	6.78803	6.72323	6.78314	6.83359	6.89904	6.74624	6.81686	6.77614	-0.0228774	0.53905	-0.00841757	0.804704	0.0588394	0.208706
ILMN_1655608	KLHL18	7.52485	7.47931	7.43596	7.48114	7.43105	7.49271	7.52353	7.40203	7.39484	7.35143	7.30349	7.3596	0.141865	0.0102836	0.130126	0.007238	0.10196	0.0874232
ILMN_1655610	RET	6.61043	6.50664	6.64086	6.64338	6.62096	6.65726	6.66746	6.6489	6.63155	6.63506	6.49376	6.62231	0.00226369	0.972048	0.0568207	0.287442	0.0655923	0.229534
ILMN_1655611	TSHZ2	6.69625	6.63482	6.74691	6.68076	6.73286	6.69242	6.76138	6.64458	6.68602	6.59708	6.67842	6.72579	0.0255672	0.633582	0.0349217	0.439925	0.0302361	0.583802
ILMN_1655612	ARRDC2	7.08581	7.13961	7.10698	7.16497	7.11473	7.10069	7.28485	7.19383	7.12087	7.17296	7.08311	7.0918	-0.00516198	0.881897	0.0108378	0.76997	0.0838893	0.204493
ILMN_1655613	GSTA2	6.67253	6.66415	6.7133	6.60117	6.69312	6.63216	6.61411	6.64998	6.71181	6.6538	6.67524	6.75706	-0.0120393	0.74771	-0.0532199	0.26863	-0.0367331	0.435899
ILMN_1655614	DSP	7.0649	7.0194	7.1819	7.26241	7.41715	7.38123	7.07525	7.15969	7.05031	6.98734	7.03845	7.02659	0.0712771	0.233261	0.336139	0.00240835	0.0776245	0.10073
ILMN_1655615	LOC646932	6.60587	6.54022	6.69544	6.46521	6.73286	6.58949	6.66598	6.63494	6.63578	6.63349	6.63167	6.66794	-0.0305227	0.547467	-0.0485112	0.568742	0.00120304	0.942244
ILMN_1655622	PRKRIR	9.15164	9.26768	9.22114	9.17681	9.21177	9.29636	8.76942	8.90051	8.57426	8.96777	8.83482	8.8515	0.328786	0.00360794	0.343611	0.00331166	-0.136641	0.257624
ILMN_1655623	LOC731884	6.62536	6.68508	6.72277	6.74097	6.74725	6.65034	6.62169	6.62377	6.55014	6.62608	6.66071	6.58223	0.0547311	0.206415	0.0898467	0.0808687	-0.0244716	0.501834
ILMN_1655624	LOC641958	6.5982	6.55602	6.55959	6.60993	6.68205	6.56722	6.63046	6.5541	6.50605	6.51888	6.63167	6.56011	0.00105257	0.977834	0.0495136	0.351497	-0.00668404	0.898019
ILMN_1655625	GPATCH1	6.97175	6.90401	6.98009	6.83925	6.93534	6.93529	6.91835	6.89047	6.98833	6.99423	6.87425	6.71639	0.0903264	0.342687	0.0416725	0.655481	0.0707619	0.454681
ILMN_1655626	FAM193B	6.73015	6.7341	6.71055	6.76724	6.69949	6.78007	6.64193	6.77219	6.68193	6.71788	6.71947	6.67389	0.021188	0.271282	0.0451893	0.19564	-0.00506135	0.908411
ILMN_1655632	DVL1	6.75584	6.58498	6.69938	6.56278	6.75911	6.6658	6.65833	6.66474	6.55653	6.6029	6.61852	6.66	0.0529255	0.375039	0.0354218	0.581866	-0.000607249	0.988314
ILMN_1655635	METTL3	8.27893	8.50089	8.5819	8.4525	8.46716	8.36652	8.64843	8.42694	8.6136	8.51646	8.58003	8.58219	-0.105656	0.319772	-0.130833	0.0263963	0.00342667	0.964353
ILMN_1655637	UPK1A	6.76735	6.71913	6.92131	6.72448	6.79173	6.73343	6.7792	6.80761	6.92636	6.82334	6.93319	6.78858	-0.0457726	0.574355	-0.0984919	0.111647	-0.0106451	0.873412
ILMN_1655642	FANCI	8.95447	9.07019	9.17277	9.1109	8.90719	9.08411	8.95408	9.00468	8.69341	9.0192	8.97915	9.03633	0.054252	0.452762	0.0225068	0.750675	-0.127502	0.262773
ILMN_1655644	ZNF804A	6.88211	6.66699	6.73557	6.63929	6.8209	6.80745	6.69996	6.68847	6.61301	6.74904	6.8932	6.67253	-0.0100374	0.91713	-0.0157122	0.86572	-0.104447	0.211038
ILMN_1655645	AK2	7.31736	7.30774	7.35419	7.19215	7.24093	7.22295	7.30311	7.22968	7.28577	7.21514	7.19125	7.32339	0.0831662	0.125536	-0.0245836	0.598748	0.0295918	0.557512
ILMN_1655654	MPDU1	7.80231	7.6876	7.78076	7.72513	7.7092	7.68746	7.87313	8.00454	8.09506	7.86094	7.79232	7.90708	-0.0965603	0.11722	-0.146183	0.0140665	0.137462	0.131002
ILMN_1655659	LOC203510	6.73015	6.63021	6.55064	6.6029	6.61129	6.62401	6.59211	6.5643	6.65511	6.60883	6.63021	6.5841	0.029287	0.613917	0.0050206	0.74936	-0.00387501	0.903412
ILMN_1655663	SC65	7.61204	7.50067	7.66348	7.62679	7.47171	7.48894	7.72637	7.62627	7.62637	7.73094	7.57084	7.67382	-0.0664674	0.378008	-0.129384	0.129172	0.00114139	0.985115
ILMN_1655664	DGKD	6.59993	6.56201	6.63421	6.5643	6.5379	6.70025	6.55155	6.60735	6.56404	6.516	6.5509	6.50241	0.0756189	0.0406854	0.0777143	0.211695	0.0512131	0.0826512
ILMN_1655684	SARS2	9.92934	9.85815	9.82177	9.74782	9.6494	9.77867	9.89675	9.68731	10.08	9.85037	9.83106	9.97656	-0.0162436	0.784303	-0.160703	0.0553385	0.00201199	0.987659
ILMN_1655690	CDR1	6.54731	6.64783	6.5366	6.56125	6.55691	6.62401	6.49722	6.68602	6.63312	6.516	6.58486	6.64938	-0.00616624	0.911875	-0.00268483	0.954473	0.0220459	0.76254
ILMN_1655694	LOC642031	8.49249	8.34969	8.52645	8.2134	8.35474	8.30294	8.45558	8.16564	8.28155	8.12171	8.0097	8.15369	0.36118	0.00655034	0.195329	0.0313486	0.205889	0.0958505
ILMN_1655701	LOC647974	6.56303	6.64494	6.633	6.69996	6.63179	6.63095	6.55014	6.59323	6.64902	6.61478	6.67383	6.6003	-0.0159779	0.663199	0.0245934	0.485939	-0.032177	0.426656
ILMN_1655702	ABHD5	7.48404	7.48214	7.43775	7.45693	7.51793	7.31936	7.6199	7.38271	7.45649	7.42698	7.42566	7.36885	0.0608132	0.0673886	0.0242387	0.714781	0.0792008	0.336936
ILMN_1655710	LOC642989	12.4073	12.5094	12.2079	12.1367	12.3316	12.3269	12.5761	12.4578	12.0706	12.5356	12.319	12.4578	-0.0626272	0.595893	-0.172428	0.128427	-0.0693108	0.696474
ILMN_1655711	PRLHR	6.56595	6.48332	6.62414	6.56861	6.63033	6.57013	6.60845	6.6307	6.6756	6.54705	6.66225	6.64794	-0.0612802	0.324675	-0.0293909	0.518471	0.0191679	0.666552
ILMN_1655713	OR2M7	6.69498	6.68205	6.68356	6.62462	6.66249	6.61276	6.58911	6.55845	6.61005	6.71078	6.57013	6.60179	0.0592987	0.238082	0.00572689	0.905205	-0.0416936	0.408099
ILMN_1655715	LOC644171	6.6382	6.59993	6.62255	6.59385	6.68578	6.59074	6.67207	6.59447	6.64902	6.6465	6.65666	6.59223	-0.0115717	0.639605	-0.00834413	0.832813	0.00672046	0.836327
ILMN_1655720	CNNM4	6.63965	6.72902	6.7877	6.79918	6.77701	6.80165	6.69996	6.77219	6.69185	6.71227	6.70227	6.83627	-0.0314778	0.63257	0.0423467	0.388419	-0.028936	0.594476
ILMN_1655722	BCL2L15	6.68205	6.59098	6.58348	6.63337	6.629	6.56595	6.59497	6.5784	6.53011	6.54705	6.46331	6.65237	0.0645936	0.364585	0.0551962	0.401551	0.0135817	0.826505
ILMN_1655733	RFC2	7.76483	7.95931	7.95018	7.88765	8.30423	8.05395	7.94523	8.03933	8.39736	8.24224	8.44181	8.2903	-0.433343	0.007702	-0.242838	0.14685	-0.197474	0.259139
ILMN_1655734	RPF1	8.76797	8.95469	8.83865	9.00672	9.15984	8.92489	9.03661	9.14028	8.77748	8.8613	8.96426	8.92099	-0.0617473	0.37617	0.114968	0.200291	0.0692719	0.569538
ILMN_1655740	SNAI2	6.80992	6.75605	6.71742	6.72981	6.76005	6.82255	6.78466	6.72788	6.73535	6.80456	6.80424	6.84767	-0.0576911	0.131098	-0.04802	0.194928	-0.0695259	0.038655
ILMN_1655748	ZNF323	7.32014	7.38541	7.285	7.30566	7.33548	7.4672	7.2901	7.34452	7.15103	7.42388	7.2691	7.14148	0.0520308	0.581123	0.0912918	0.393453	-0.0162701	0.878553
ILMN_1655754	LOC402066	6.69625	6.60956	6.61534	6.60587	6.6347	6.57013	6.669	6.5541	6.64458	6.60142	6.63482	6.59385	0.0303559	0.37852	-0.00646279	0.788378	0.0125322	0.752793
ILMN_1655755	LOC400879	6.76194	6.67665	6.77269	6.74467	6.69949	6.85944	6.70446	6.76171	6.73072	6.80209	6.7757	6.64482	-0.00377568	0.950653	0.0269987	0.711807	-0.00857273	0.875541
ILMN_1655758	LOC646407	6.65988	6.73535	6.64968	6.73766	6.66106	6.74982	6.7792	6.61067	6.7242	6.55296	6.68228	6.6756	0.0446887	0.421718	0.0792353	0.190943	0.0677464	0.356355
ILMN_1655765	MRPS21	11.1978	11.3166	11.1777	11.2193	11.159	11.1869	11.3221	11.1745	11.4436	11.2798	11.3368	11.3429	-0.0891184	0.135623	-0.13143	0.00780425	-0.00637423	0.940582
ILMN_1655766	ANKRD34B	6.61386	6.61962	6.54448	6.74702	6.60993	6.61852	6.6465	6.60327	6.67407	6.71078	6.5541	6.61411	-0.0336758	0.549841	0.0321636	0.639792	0.0149512	0.780127
ILMN_1655771	LOC643502	6.82461	6.8551	6.86208	6.77789	6.87875	6.84292	6.74825	6.83601	6.67853	6.82207	6.79475	6.77778	0.0490645	0.0469259	0.0349877	0.338507	-0.0439345	0.405989
ILMN_1655773	LOC647541	6.62682	6.55896	6.69114	6.54583	6.66746	6.6256	6.62328	6.63494	6.58786	6.67054	6.68111	6.70146	-0.0587313	0.208692	-0.0714065	0.12441	-0.0690091	0.0148056
ILMN_1655780	METTL10	7.048	6.98052	6.9845	7.04032	7.00184	6.97194	6.85748	6.9093	6.87221	6.99423	6.9108	6.92092	0.062355	0.142241	0.0627177	0.129329	-0.0623201	0.110309
ILMN_1655783	ATP1B3	6.65845	6.61116	6.53802	6.58035	6.62377	6.60993	6.6465	6.62645	6.59695	6.51232	6.59659	6.57606	0.0408897	0.397994	0.0430278	0.204592	0.0616463	0.102086
ILMN_1655788	ZNF780A	6.62828	6.63337	6.6256	6.64061	6.69834	6.63095	6.67207	6.7487	6.58924	6.6206	6.67242	6.671	-0.0255936	0.210827	0.00195779	0.945826	0.0153302	0.770459
ILMN_1655789	LOC643356	6.62377	6.61558	6.6538	6.67842	6.6347	6.65189	6.57316	6.63494	6.60858	6.57443	6.57884	6.55845	0.0604822	0.0100769	0.0844313	0.00395696	0.0349901	0.138378
ILMN_1655796	44258	7.81606	7.68309	7.75001	7.81415	7.7476	7.71372	7.7664	7.55331	7.79617	7.5389	7.62226	7.64351	0.148168	0.0412401	0.156936	0.0225452	0.103741	0.278834
ILMN_1655809	SF3A1	6.65547	6.63482	6.75071	6.69428	6.6471	6.62011	6.61705	6.72039	6.62864	6.73535	6.66794	6.68205	-0.0147786	0.73777	-0.0412806	0.238875	-0.0397515	0.361231
ILMN_1655819	LOC728919	7.05808	7.23431	7.20591	7.10745	7.12224	7.05943	7.2405	7.27011	7.35235	7.31714	7.32619	7.30338	-0.149468	0.053196	-0.219197	0.000400454	-0.0279159	0.459061
ILMN_1655821	CAPG	6.58285	6.69079	6.71467	6.69277	6.67042	6.55691	6.69996	6.6489	6.69185	6.66888	6.68228	6.61913	0.00600937	0.899929	-0.0167305	0.735775	0.0234713	0.399226
ILMN_1655827	COPS2	7.94047	7.9325	7.76072	7.95601	8.10809	7.96358	7.6348	7.90313	7.59615	7.92691	8.12842	7.99692	-0.139522	0.168968	-0.00819341	0.920436	-0.306057	0.0538492
ILMN_1655842	LOC442597	8.00984	8.02626	8.15652	8.16379	8.05439	8.07913	8.27364	8.29939	8.24009	8.31192	8.24327	8.27055	-0.211041	0.0139392	-0.17614	0.0103793	-0.00420719	0.880771
ILMN_1655844	TAF1A	6.58147	6.68508	6.72788	6.72562	6.6087	6.60845	6.70273	6.72039	6.57001	6.69869	6.64338	6.65093	0.000479401	0.992315	-0.0167423	0.714881	4.27197e-05	0.999366
ILMN_1655849	GSC	6.61815	6.55602	6.53207	6.69869	6.65117	6.60993	6.57165	6.57544	6.5331	6.70825	6.58624	6.56849	-0.0522458	0.362454	0.0322712	0.560273	-0.0609308	0.255615
ILMN_1655860	LOC651506	6.65988	6.61815	6.64968	6.59534	6.64193	6.70503	6.669	6.66106	6.68602	6.62742	6.61264	6.84897	-0.0537759	0.525737	-0.0489085	0.586402	-0.0243162	0.767334
ILMN_1655863	LOC646193	6.56874	6.60796	6.66118	6.61852	6.61962	6.72323	6.53932	6.56595	6.7255	6.6029	6.56849	6.60956	0.0189771	0.557072	0.0601388	0.179214	0.0166057	0.794047
ILMN_1655864	LOC653853	6.47402	6.57013	6.565	6.56278	6.62231	6.59534	6.67912	6.68205	6.64602	6.54705	6.64206	6.59857	-0.0595092	0.225578	-0.00241779	0.944109	0.0731692	0.0699712
ILMN_1655867	HRASLS	8.24678	8.38292	8.64881	8.4075	8.35593	8.47339	8.57603	8.69614	8.4632	8.53568	8.26823	8.49249	-0.005967	0.968987	-0.0198642	0.835397	0.146323	0.242338
ILMN_1655868	ANP32C	7.52056	7.62262	7.56792	7.30865	7.52327	7.48141	7.60694	7.52946	7.57252	7.53576	7.72229	7.75568	-0.100876	0.2472	-0.233468	0.0695799	-0.101608	0.23101
ILMN_1655871	LOC647384	6.64278	6.59708	6.56963	6.62596	6.71502	6.61411	6.74232	6.68602	6.64902	6.57594	6.71422	6.7133	-0.0646603	0.270839	-0.0161254	0.787311	0.0246337	0.668268
ILMN_1655876	TMEM159	6.71981	6.80703	6.7877	6.86151	6.81099	6.79616	6.80606	6.80655	6.95302	6.8497	6.76327	6.80144	-0.0332897	0.412141	0.0180796	0.600999	0.0504028	0.41075
ILMN_1655880	CHST11	6.72641	6.63337	6.71193	6.65761	6.69312	6.74064	6.61288	6.62377	6.64025	6.63651	6.64338	6.60327	0.0628448	0.11631	0.0694012	0.0622809	-0.00208737	0.894081
ILMN_1655884	ATP2A2	8.77828	8.86031	8.85824	8.79351	8.87877	8.80457	8.85995	8.81117	9.05405	8.6621	8.8537	9.02897	-0.015984	0.890835	-0.0226439	0.845954	0.060128	0.666168
ILMN_1655892	MMGT1	6.6613	6.75605	6.63009	6.71536	6.69451	6.70895	6.70745	6.75817	6.62389	6.68193	6.73252	6.84616	-0.0710534	0.312825	-0.0472623	0.388952	-0.0570321	0.412258
ILMN_1655893	C9orf93	6.70895	6.671	6.62109	6.62145	6.59186	6.68975	6.55475	6.59708	6.66391	6.6495	6.59223	6.59223	0.0556927	0.154835	0.0230318	0.543227	-0.00607487	0.877772
ILMN_1655894	MYL1	6.72471	6.80981	6.81681	6.64938	6.73026	6.7449	6.79746	6.68064	6.78237	6.67618	6.66379	6.80004	0.0704354	0.25171	-0.00515927	0.926685	0.0401483	0.519382
ILMN_1655904	ROR1	6.65273	6.78575	6.68835	6.83485	6.72141	6.87875	6.62169	6.73444	6.84407	6.75428	6.72823	6.80553	-0.0537356	0.305643	0.0489907	0.400181	-0.0292753	0.689397
ILMN_1655905	DEFB131	6.61681	6.60796	6.58674	6.57013	6.64055	6.60685	6.62328	6.67018	6.64314	6.61153	6.61558	6.6157	-0.0104361	0.311964	-0.00842708	0.700462	0.0312609	0.0839793
ILMN_1655906	FBXW7	6.6613	6.64938	6.72663	6.66285	6.51823	6.62401	6.60993	6.67395	6.77032	6.56709	6.65666	6.71788	0.031895	0.557747	-0.0455137	0.500461	0.037522	0.588902
ILMN_1655909	LOC649858	6.59341	6.56557	6.6538	6.56861	6.63337	6.52529	6.66438	6.60463	6.55359	6.52215	6.54923	6.56163	0.059923	0.103626	0.0314171	0.401391	0.0631953	0.137232
ILMN_1655913	NUCB2	8.34709	8.41731	8.3445	8.30065	8.51954	8.48249	8.47102	8.83222	8.07204	8.5892	8.55875	8.68705	-0.242032	0.00598913	-0.177438	0.0850763	-0.153238	0.529604
ILMN_1655915	MMP11	6.8402	6.72164	6.8052	6.73377	6.73659	6.78291	6.88535	6.79724	6.78901	6.79918	6.76094	6.85758	-0.0168872	0.726615	-0.05481	0.16498	0.0179665	0.688909
ILMN_1655921	GTF2E1	7.87538	7.92583	7.82826	7.80197	7.9415	7.88438	7.72584	8.01343	7.61321	7.86935	7.53799	7.58892	0.211071	0.119311	0.210528	0.129961	0.118738	0.492901
ILMN_1655922	SAPS2	7.79189	7.71789	7.76604	7.63095	7.58817	7.68676	7.90574	7.63291	7.95941	7.77169	7.63101	7.61407	0.086351	0.188019	-0.0369653	0.55554	0.160429	0.22787
ILMN_1655924	TRNT1	7.2268	7.28354	7.18838	7.27221	7.38368	7.38509	7.19186	7.33074	7.0039	7.19796	7.21111	7.23499	0.0182194	0.572641	0.132305	0.0273247	-0.0391896	0.702056
ILMN_1655930	ELL2	7.35466	7.32466	7.3364	7.24936	7.41534	7.32978	7.27046	7.1469	7.13569	7.22756	7.22536	7.20098	0.120607	0.000586753	0.113524	0.0800455	-0.0336179	0.487509
ILMN_1655932	RPE	6.67947	6.66415	6.55512	6.6901	6.62499	6.71925	6.63747	6.61067	6.61005	6.63506	6.63021	6.6538	-0.00677642	0.873076	0.0384191	0.252743	-0.0202924	0.153787
ILMN_1655935	ADCY7	6.68064	6.75472	6.65976	6.70146	6.73535	6.76531	6.74512	6.74097	6.81708	6.78171	6.72823	6.66474	-0.02652	0.582635	0.00914599	0.823948	0.0428318	0.364181
ILMN_1655938	LOC650721	6.52151	6.6435	6.5714	6.51133	6.58911	6.54795	6.62608	6.60142	6.53167	6.59248	6.58774	6.56163	-0.00181508	0.962913	-0.031154	0.271235	0.00577415	0.856059
ILMN_1655940	LOC652068	6.55372	6.61399	6.63155	6.61852	6.59186	6.48104	6.59497	6.58874	6.57582	6.53777	6.56036	6.67853	0.00753293	0.886649	-0.0284138	0.663767	-0.00571246	0.902991
ILMN_1655941	DKFZp434N035	6.61386	6.70895	6.7332	6.65511	6.68695	6.77614	6.86037	6.84887	6.75684	6.74904	6.72981	6.64482	-0.0225522	0.666064	-0.00182384	0.971714	0.114136	0.0673813
ILMN_1655949	LOC653107	6.68205	6.61815	6.62414	6.54583	6.68205	6.69892	6.57165	6.58699	6.57582	6.63506	6.59509	6.65093	0.0144146	0.612629	0.0152339	0.780995	-0.0488802	0.0470249
ILMN_1655950	ZHX1	6.77274	6.71341	6.74232	6.69718	6.69312	6.78977	6.89124	6.71353	6.73535	6.69451	6.71673	6.63349	0.0612452	0.112562	0.0451124	0.324508	0.0984579	0.183173
ILMN_1655952	FAM39E	10.0925	10.3703	10.0546	10.2657	9.92644	10.1323	10.327	9.96698	10.3232	10.249	10.2902	10.2134	-0.0784002	0.484837	-0.142698	0.231154	-0.0451648	0.728767
ILMN_1655955	LRRIQ1	6.57222	6.57896	6.57582	6.56569	6.58761	6.58811	6.54371	6.54962	6.65666	6.59111	6.56163	6.50664	0.0225384	0.415341	0.0273472	0.349447	0.0302021	0.53258
ILMN_1655961	C7orf54	7.24479	7.11344	7.10467	7.18764	7.13176	7.1295	7.09387	7.04542	7.17823	7.15087	7.02373	7.03529	0.084332	0.237941	0.0796682	0.150127	0.0358712	0.557691
ILMN_1655974	PDE6B	6.76999	6.67665	6.64968	6.69591	6.70883	6.68474	6.68963	6.72436	6.79178	6.72192	6.71159	6.68345	-0.00687926	0.86591	-0.00916124	0.532847	0.0296053	0.408759
ILMN_1655980	LOC401280	6.7133	6.73535	6.59136	6.64494	6.62742	6.52045	6.64326	6.67395	6.70469	6.70434	6.63167	6.61411	0.0299606	0.599482	-0.0524344	0.333493	0.0239243	0.506446
ILMN_1655983	CDC14A	6.91208	6.62584	6.6483	6.6273	6.67806	6.64482	6.55666	6.59584	6.56404	6.76602	6.61987	6.60808	0.064081	0.574658	-0.0145979	0.79638	-0.0924795	0.151147
ILMN_1655985	GALNT10	6.75461	6.61558	6.55666	6.64061	6.68695	6.65464	6.58311	6.71227	6.62231	6.65678	6.68392	6.68041	-0.0314194	0.624256	-0.0129694	0.46693	-0.0344755	0.428493
ILMN_1655987	STAB1	6.59341	6.57468	6.63572	6.57582	6.66249	6.5541	6.59621	6.58874	6.65809	6.61607	6.62267	6.61411	-0.0163462	0.420801	-0.0201511	0.57675	-0.00327214	0.889618
ILMN_1655990	CDK5RAP2	8.8868	8.95282	8.65438	9.08799	8.75461	9.05539	8.83653	8.76509	8.81801	8.91772	8.92508	8.99477	-0.114525	0.289056	0.0201376	0.862307	-0.139316	0.0128768
ILMN_1656011	RGS1	6.63216	6.61399	6.60772	6.55819	6.57606	6.52045	6.60993	6.55256	6.65046	6.67483	6.68975	6.59857	-0.0364276	0.279886	-0.102813	0.0345506	-0.0500644	0.27941
ILMN_1656015	LOC648830	6.52477	6.49742	6.565	6.60117	6.4709	6.62718	6.60845	6.56741	6.61301	6.49403	6.63337	6.66794	-0.0693788	0.287962	-0.0320302	0.678814	-0.00215508	0.970673
ILMN_1656016	DHX9	7.65102	7.44188	7.63767	7.47273	7.42497	7.48414	7.42023	7.26902	7.54526	7.5434	7.58892	7.54325	0.0183375	0.804343	-0.0979075	0.0143816	-0.147018	0.144812
ILMN_1656017	NRF1	6.70192	6.72323	6.66273	6.71536	6.68835	6.63784	6.69683	6.78336	6.65511	6.61153	6.67971	6.71788	0.0262528	0.50398	0.0108123	0.792852	0.0420618	0.43843
ILMN_1656019	LOC642003	6.82334	6.73962	6.58674	6.69869	6.69451	6.77263	6.89662	6.67665	6.67407	6.75428	6.69648	6.65093	0.0160033	0.842387	0.0213806	0.614594	0.0485506	0.574807
ILMN_1656021	DAZ4	6.61681	6.63627	6.701	6.40187	6.6347	6.60537	6.65678	6.61926	6.53011	6.61607	6.75244	6.65093	-0.0217903	0.674477	-0.125836	0.207887	-0.0710983	0.269671
ILMN_1656024	LOC653581	6.61043	6.54022	6.55231	6.63191	6.55845	6.68064	6.65976	6.51455	6.54705	6.60439	6.6273	6.7516	-0.0934424	0.138573	-0.037428	0.553253	-0.0873063	0.240911
ILMN_1656033	PCDHA2	6.76867	6.73162	6.81441	6.74948	6.77142	6.74725	6.73388	6.73585	6.88633	6.76899	6.84584	6.83768	-0.0459397	0.249918	-0.061458	0.0740152	-0.0321557	0.596978
ILMN_1656040	NTN3	6.58448	6.57619	6.6538	6.58185	6.516	6.73343	6.6465	6.70088	6.73241	6.53621	6.63482	6.62864	0.00493587	0.908376	0.0105373	0.890481	0.0933738	0.0828249
ILMN_1656042	KIAA0319L	6.8402	6.71913	6.78193	6.87885	6.7048	6.7063	6.71021	6.66249	6.76591	6.65809	6.79075	6.8263	0.0220392	0.74012	0.00493538	0.952082	-0.0455108	0.485394
ILMN_1656045	BRUNOL6	6.62096	6.6273	6.51744	6.67136	6.629	6.61141	6.71307	6.62499	6.59236	6.63651	6.60845	6.52215	-0.000474291	0.992817	0.0482143	0.281212	0.0544346	0.336111
ILMN_1656051	KRTAP19-4	6.56734	6.67242	6.60191	6.63772	6.66616	6.62255	6.66746	6.67136	6.60439	6.62742	6.60969	6.60327	0.000430676	0.989827	0.028685	0.122414	0.0342749	0.208379
ILMN_1656052	LOC643143	6.71462	6.60463	6.71467	6.61399	6.58761	6.58811	6.669	6.57971	6.66533	6.62462	6.68672	6.74232	-0.00657941	0.90167	-0.0879821	0.0662543	-0.0465397	0.357492
ILMN_1656057	PLAU	11.5478	11.6337	11.4723	11.5319	11.5362	11.7026	11.4819	11.2373	11.4247	11.4046	11.3211	11.2303	0.232594	0.0274931	0.271564	0.022751	0.0626682	0.521807
ILMN_1656066	TNPO2	9.66357	9.8617	9.69491	10.0272	9.67145	9.7866	9.99737	10.011	9.9092	9.81421	9.83106	9.84009	-0.0883969	0.226794	-4.07857e-05	0.999709	0.144061	0.0117512
ILMN_1656069	C17orf55	6.59173	6.60796	6.47402	6.58185	6.60993	6.61705	6.60697	6.47158	6.59695	6.73015	6.57449	6.62231	-0.0844143	0.247866	-0.039371	0.451763	-0.0838157	0.25654
ILMN_1656073	LOC442204	6.89184	6.77931	6.73162	6.74467	6.75794	6.77131	6.65237	6.80058	6.75516	6.74367	6.79075	6.83915	0.00973412	0.867919	-0.0332136	0.310349	-0.0551522	0.346893
ILMN_1656074	LOC653145	6.58611	6.64206	6.69114	6.58335	6.57606	6.51153	6.55155	6.57229	6.65964	6.51888	6.48614	6.61264	0.100552	0.10712	0.0177606	0.708652	0.0552716	0.33385
ILMN_1656079	KCNQ1	6.61386	6.47361	6.60624	6.6029	6.66746	6.60537	6.70135	6.61214	6.62718	6.54255	6.62267	6.56696	-0.012824	0.815049	0.047852	0.206292	0.0694966	0.128593
ILMN_1656082	H3F3A	11.8939	12.2652	12.1809	12.0472	12.1334	12.1535	12.2302	12.4795	12.13	12.3441	12.2117	12.1454	-0.120445	0.395458	-0.122434	0.141205	0.0461241	0.718538
ILMN_1656084	PDZK1	6.64278	6.6273	6.56214	6.60117	6.62377	6.54061	6.59621	6.60463	6.68864	6.53621	6.61116	6.52045	0.054794	0.216049	0.0325731	0.433028	0.0738851	0.143398
ILMN_1656088	C1orf110	6.541	6.52229	6.58986	6.53945	6.63337	6.54061	6.49563	6.73585	6.53466	6.60587	6.64338	6.49042	-0.0288414	0.596663	-0.00874821	0.882506	0.0088237	0.924536
ILMN_1656097	SLCO1A2	6.71055	6.71341	6.7332	6.70883	6.69451	6.73083	6.58022	6.67818	6.65809	6.65093	6.71296	6.57291	0.0734518	0.148728	0.0657888	0.191222	-0.00677178	0.899488
ILMN_1656110	LOC440261	6.5615	6.58811	6.62109	6.71273	6.6471	6.60845	6.70745	6.64746	6.58924	6.54255	6.72527	6.57606	-0.0243926	0.699288	0.0414673	0.551631	0.0334225	0.637816
ILMN_1656111	MYLIP	8.59396	8.51934	8.60038	8.67941	8.71309	8.4075	8.37459	8.34149	8.67072	8.35921	8.47212	8.37031	0.17068	0.0183319	0.199452	0.12542	0.0617201	0.606753
ILMN_1656118	ZBTB7A	7.1906	7.06024	7.28826	7.06557	7.10213	7.00511	7.14681	7.26428	7.10492	6.99423	7.21817	7.0918	0.0782986	0.445163	-0.0437961	0.569294	0.0706045	0.429863
ILMN_1656123	LOC731159	6.61386	6.60636	6.6852	6.63033	6.61681	6.61583	6.59061	6.48029	6.64602	6.56709	6.55845	6.64938	0.0435045	0.320028	0.0293504	0.373951	-0.0193319	0.750207
ILMN_1656129	SLC39A10	7.47488	7.63831	7.336	7.60836	7.60052	7.68804	7.34936	7.45526	7.23542	7.61201	7.54889	7.58284	-0.0981833	0.333042	0.0510563	0.200896	-0.234571	0.0237633
ILMN_1656131	LOC401237	6.69219	6.71913	6.78193	6.66852	6.70883	6.68064	6.76005	6.7487	6.76899	6.91983	6.72823	6.70895	-0.0545841	0.492691	-0.0996703	0.218599	-0.0264195	0.715726
ILMN_1656132	PNLDC1	6.59509	6.63021	6.61239	6.59074	6.516	6.53167	6.46955	6.53777	6.57443	6.71639	6.6594	6.60476	-0.0476158	0.231519	-0.114047	0.0445267	-0.132935	0.0405288
ILMN_1656134	CNOT7	9.11128	9.22805	9.17597	9.06914	9.38404	9.02715	9.00551	9.37907	9.15214	9.16291	9.04318	9.06747	0.0805816	0.180659	0.0689235	0.591707	0.0877249	0.486807
ILMN_1656136	STAU1	9.68213	9.97206	10.0885	9.71151	10.0668	9.62862	9.5747	9.97715	9.7929	9.74414	9.81195	9.7447	0.147302	0.296867	0.0353683	0.808007	0.01465	0.907553
ILMN_1656137	LOC651892	6.54255	6.59993	6.60042	6.64938	6.55256	6.63361	6.58311	6.51021	6.68333	6.57001	6.6273	6.57757	-0.0106597	0.706027	0.0202252	0.593942	0.000590621	0.99169
ILMN_1656139	LOC730417	6.6671	6.66415	6.63572	6.58649	6.76005	6.61705	6.62169	6.70745	6.59086	6.66462	6.5541	6.7133	0.011652	0.820685	0.0105227	0.889769	-0.00400618	0.948784
ILMN_1656144	MAPKAPK2	6.57733	6.60636	6.53971	6.66994	6.46331	6.53011	6.52842	6.56595	6.58223	6.44761	6.61705	6.52529	0.0444822	0.445638	0.0244685	0.769796	0.0288821	0.604834
ILMN_1656145	GOT1	10.5778	10.6081	10.6578	10.4377	10.4466	10.4674	10.4358	10.3878	10.4227	10.4888	10.4141	10.3608	0.193309	0.011589	0.0293289	0.484792	-0.00583526	0.89047
ILMN_1656149	FLJ22531	6.8683	6.82757	6.89753	6.98231	6.7927	6.82112	6.86347	6.9069	6.82482	6.78171	6.80424	6.90115	0.0354346	0.445147	0.0363413	0.628608	0.0360316	0.45541
ILMN_1656159	ATP10D	6.59341	6.71639	6.66118	6.76591	6.66379	6.66994	6.65237	6.73726	6.68041	6.7341	6.67689	6.6173	-0.0191018	0.716566	0.0237849	0.640988	0.0139147	0.75683
ILMN_1656165	USP9X	8.36198	8.38519	8.25057	8.60566	8.29018	8.40395	8.2164	8.44193	8.15063	8.37459	8.47364	8.43124	-0.0939066	0.136437	0.00677587	0.947446	-0.156834	0.16613
ILMN_1656169	LOC652579	6.73388	6.51455	6.55819	6.60722	6.58335	6.50081	6.61288	6.5784	6.5108	6.59248	6.58624	6.59546	0.0108141	0.879749	-0.0275971	0.441699	-0.0240327	0.469386
ILMN_1656170	MARLIN1	6.62096	6.68508	6.54769	6.55167	6.63747	6.69359	6.53932	6.61214	6.67253	6.59248	6.59373	6.57606	0.0304894	0.489385	0.0401545	0.389639	0.0205755	0.625105
ILMN_1656171	ADAMTS19	6.62377	6.6273	6.72425	6.55819	6.60439	6.67337	6.59621	6.57663	6.71181	6.65237	6.68392	6.58561	0.01781	0.70548	-0.0286503	0.55278	-0.0124121	0.820285
ILMN_1656176	LOC642553	6.71462	6.7757	6.70503	6.83779	6.68835	6.59074	6.72799	6.58699	6.77032	6.69149	6.67971	6.70895	0.0384002	0.180567	0.0122424	0.873826	0.00171729	0.977033
ILMN_1656181	LOC647065	6.65702	6.61399	6.5714	6.6563	6.69707	6.64338	6.66118	6.56595	6.61766	6.66888	6.57884	6.73219	-0.0458337	0.41876	0.00561418	0.911319	-0.0450353	0.437888
ILMN_1656182	LOC642229	6.6937	6.7341	6.7189	6.70883	6.6087	6.63216	6.65678	6.57663	6.62096	6.67742	6.66947	6.7149	0.0283017	0.196945	-0.0373687	0.324876	-0.0691383	0.0631219
ILMN_1656184	PI4KAP1	6.97947	7.00647	7.12688	7.15217	7.10291	7.11162	7.04223	7.18808	7.06732	7.12749	7.19563	7.07107	-0.0937949	0.180444	-0.00916698	0.826054	-0.0321918	0.606368
ILMN_1656185	DEF8	9.35008	9.35383	9.30102	9.13852	9.09868	9.22488	9.47912	9.40425	9.60372	9.27465	9.27277	9.44847	0.0030119	0.962798	-0.177935	0.0617598	0.163736	0.117618
ILMN_1656186	SLC41A1	7.20151	7.19088	7.34145	7.34581	7.46713	7.2528	7.46245	7.17835	7.2736	7.23088	7.29802	7.23932	-0.0114562	0.839179	0.0991759	0.204812	0.0487291	0.60171
ILMN_1656187	LOC646554	6.5982	6.58047	6.54299	6.63033	6.64974	6.62828	6.73388	6.58223	6.45043	6.6206	6.59373	6.59708	-0.0299153	0.178158	0.0323141	0.0410701	-0.0149563	0.864677
ILMN_1656189	MGC19604	6.59993	6.74798	6.76756	6.74097	6.62231	6.51021	6.59348	6.65809	6.74702	6.6029	6.59373	6.62536	0.0978286	0.14283	0.0171698	0.811163	0.05887	0.265286
ILMN_1656192	ZNF704	6.64674	6.61815	6.54299	6.64206	6.68064	6.70895	6.73951	6.71227	6.6071	6.66604	6.60969	6.64938	-0.0390747	0.328786	0.0355124	0.237613	0.04459	0.365196
ILMN_1656193	MGC33407	6.57733	6.58348	6.59757	6.63191	6.6087	6.56595	6.53777	6.58699	6.69185	6.61153	6.60969	6.55064	-0.00449307	0.840107	0.0115687	0.698695	0.0149123	0.778835
ILMN_1656194	TSPAN10	6.6937	6.83253	6.73444	6.69718	6.67923	6.71033	6.77603	6.72675	6.70042	6.78171	6.7595	6.74713	-0.00922376	0.838529	-0.0672027	0.00770265	-0.0283851	0.308673
ILMN_1656196	E2F6	7.95941	7.87945	7.97399	8.01663	7.99575	7.9201	7.79734	7.95447	7.93057	7.89815	7.87436	7.79688	0.0811565	0.128172	0.121031	0.0460627	0.0376611	0.549264
ILMN_1656199	LOC650759	6.5982	6.55743	6.70895	6.64061	6.65547	6.69114	6.68649	6.60142	6.53777	6.67483	6.65356	6.76735	-0.0770591	0.249017	-0.0361731	0.395155	-0.0900259	0.179859
ILMN_1656200	KATNAL2	6.66852	6.55896	6.62414	6.78749	6.73286	6.69753	6.68963	6.65809	6.68731	6.68578	6.64061	6.64169	-0.0388253	0.331025	0.0832643	0.0505464	0.0223136	0.283114
ILMN_1656201	LOC645359	6.59993	6.52091	6.59906	6.59385	6.68695	6.66308	6.61705	6.67665	6.55014	6.64806	6.50387	6.59857	-0.0101956	0.847644	0.0644604	0.272353	0.0311184	0.607418
ILMN_1656208	LOC645304	6.97299	6.93539	6.91368	6.81867	6.97165	6.95982	6.95505	6.85095	6.78357	6.92231	6.94536	7.09074	-0.0454502	0.458807	-0.0694225	0.38999	-0.122948	0.165521
ILMN_1656218	LOC388022	6.69903	6.69509	6.74232	6.57733	6.64055	6.65345	6.62328	6.53595	6.66391	6.60735	6.55845	6.6569	0.104582	0.0314309	0.0162103	0.683066	0.000151293	0.997599
ILMN_1656221	OR2T27	6.57051	6.51613	6.60463	6.68626	6.60142	6.55109	6.56443	6.58536	6.55512	6.63941	6.58486	6.62536	-0.0527824	0.158804	-0.00361985	0.93651	-0.0482376	0.0608092
ILMN_1656225	DUPD1	6.56595	6.63021	6.6569	6.6901	6.64314	6.73884	6.65833	6.61386	6.62389	6.60142	6.57013	6.66	0.0071736	0.858399	0.0801773	0.103594	0.0215144	0.50731
ILMN_1656232	LOC202134	6.55538	6.71639	6.58674	6.57884	6.59472	6.66852	6.70584	6.60142	6.66829	6.59558	6.71033	6.671	-0.0394686	0.544561	-0.0449463	0.360375	-0.000456317	0.992471
ILMN_1656233	LOC389517	12.3037	12.3904	12.3385	12.3441	12.1969	12.3783	12.1872	12.0761	12.26	12.4024	12.3037	12.2976	0.00960183	0.831497	-0.0281176	0.688549	-0.160127	0.0647878
ILMN_1656242	C1R	6.56595	6.66699	6.72004	6.63929	6.65117	6.61141	6.51613	6.67818	6.7412	6.61301	6.63917	6.62536	0.0251503	0.61229	0.00811456	0.593228	0.0193275	0.788718
ILMN_1656248	ASAM	6.98895	7.03721	7.07947	6.84292	6.88201	6.88779	6.9294	7.01325	6.97804	6.90241	6.9008	6.89693	0.135162	0.00670512	-0.0291404	0.10917	0.0735173	0.0392509
ILMN_1656250	FLJ25169	6.71844	6.77417	6.71742	6.65511	6.67524	6.73219	6.75299	6.65404	6.73535	6.70825	6.66225	6.84062	-0.000365145	0.995166	-0.0495265	0.442968	-0.0229138	0.728518
ILMN_1656251	LOC401778	6.66994	6.73026	6.61091	6.66852	6.52712	6.66308	6.66438	6.74982	6.63312	6.63941	6.71422	6.52359	0.0446295	0.531762	-0.0061706	0.936008	0.0566978	0.435584
ILMN_1656254	NOTCH2NL	6.98757	7.06839	6.96486	7.02083	6.90406	6.95069	7.03657	7.13176	7.15612	7.04795	7.01459	7.13535	-0.0590241	0.284348	-0.107439	0.0956606	0.042186	0.456683
ILMN_1656257	LOC732275	6.61534	6.57896	6.61681	6.62462	6.61962	6.54371	6.55819	6.59708	6.65809	6.62194	6.58774	6.65237	-0.0169818	0.49057	-0.0246997	0.485207	-0.0162296	0.663021
ILMN_1656266	FLJ38379	6.56303	6.60956	6.62718	6.68766	6.51717	6.41255	6.53005	6.66474	6.59236	6.58811	6.56036	6.64326	0.00267992	0.935219	-0.0581158	0.526112	-0.0015291	0.975029
ILMN_1656274	PRPF38A	7.62724	7.70068	7.63843	7.64666	7.6438	7.63933	7.6159	7.5714	7.54526	7.53292	7.47587	7.50701	0.150181	0.00596309	0.137993	0.00115137	0.0722524	0.0521015
ILMN_1656280	LOC646584	6.64674	6.65093	6.66415	6.60439	6.70607	6.60845	6.62608	6.51921	6.76899	6.68695	6.71422	6.67701	-0.0387843	0.0344042	-0.0530896	0.204421	-0.0546304	0.496992
ILMN_1656285	METTL7A	6.54731	6.46697	6.62109	6.54756	6.57745	6.56595	6.59497	6.53932	6.61005	6.59708	6.5982	6.64326	-0.0677215	0.223303	-0.0491899	0.0484736	-0.0313968	0.299231
ILMN_1656287	SPOCK2	6.79475	6.80981	6.93667	6.89904	6.9097	6.89042	6.91458	6.78488	6.79475	6.84177	6.78193	6.77931	0.0460725	0.403908	0.098716	0.00952916	0.0303994	0.548193
ILMN_1656291	TSKS	6.53479	6.56201	6.51021	6.55167	6.53167	6.56595	6.64494	6.54666	6.63021	6.57594	6.5331	6.58699	-0.0296712	0.25276	-0.015576	0.46289	0.0419317	0.293864
ILMN_1656292	LOC388532	11.147	11.0492	10.8814	11.0401	11.0197	11.2393	11.1735	11.0814	11.2009	11.2848	11.281	11.3696	-0.285906	0.025956	-0.212091	0.0489043	-0.159869	0.0259804
ILMN_1656293	GOSR2	7.79606	7.74599	7.68104	7.78736	7.74101	7.79647	7.95032	7.8132	8.08306	7.80645	7.85055	8.0114	-0.148437	0.103444	-0.11452	0.150983	0.0593905	0.583599
ILMN_1656297	C21orf57	7.80607	7.79686	7.84892	7.7238	7.71705	7.84472	7.96066	7.92642	7.96599	7.97795	8.08473	8.00869	-0.206509	0.00437414	-0.261936	0.00740878	-0.0727668	0.0995687
ILMN_1656300	GFRA2	6.76591	6.79345	6.68064	6.66852	6.65273	6.62401	6.77603	6.63627	6.66533	6.62341	6.69938	6.62231	0.0983048	0.0816167	5.72801e-05	0.9985	0.0441806	0.423695
ILMN_1656301	LOC646139	6.62961	6.55743	6.52921	6.61852	6.52124	6.60389	6.66598	6.54229	6.6029	6.60142	6.60241	6.6157	-0.0344263	0.318628	-0.0252898	0.455436	-0.00278496	0.942061
ILMN_1656303	SNORD28	6.61681	6.53867	6.59757	6.62011	6.6569	6.67912	6.63046	6.67959	6.55959	6.56557	6.68672	6.58911	-0.0294482	0.539161	0.0382427	0.402543	0.00941375	0.862211
ILMN_1656310	INDO	6.55538	6.54821	6.5366	6.57013	6.61815	6.59534	6.53005	6.58386	6.57582	6.60735	6.58047	6.6632	-0.0702765	0.0481113	-0.0224639	0.467869	-0.0537656	0.143188
ILMN_1656315	DMD	6.67253	6.70192	6.75839	6.68345	6.60439	6.72062	6.7792	6.5811	6.76735	6.60587	6.67689	6.70895	0.0470467	0.299749	0.00558255	0.908962	0.0453148	0.558101
ILMN_1656316	ZMYM3	8.50869	8.44993	8.8301	8.55509	8.56695	8.45676	8.44679	8.49164	8.58065	8.54952	8.44592	8.41507	0.126066	0.370106	0.0560937	0.354398	0.0361886	0.557193
ILMN_1656318	LOC352909	6.61043	6.52399	6.61681	6.58035	6.62096	6.61583	6.69405	6.60327	6.64902	6.58811	6.58924	6.7585	-0.0615434	0.390938	-0.039571	0.532745	0.00349627	0.957991
ILMN_1656321	LTBP1	6.63965	6.52229	6.62414	6.59074	6.73286	6.58811	6.59061	6.71639	6.64169	6.58811	6.75133	6.71033	-0.087898	0.224918	-0.046018	0.538413	-0.0336918	0.610868
ILMN_1656325	LOC641810	6.51508	6.43451	6.58035	6.66994	6.58624	6.57165	6.55475	6.6307	6.64025	6.59111	6.64338	6.60327	-0.102607	0.0849371	-0.0033115	0.928055	-0.00402075	0.904053
ILMN_1656327	GLT1D1	6.74937	6.7205	6.84292	6.69718	6.75911	6.65874	6.57468	6.72152	6.7412	6.57884	6.75133	6.65547	0.109051	0.153856	0.0431334	0.497201	0.0172536	0.823479
ILMN_1656330	CCKAR	6.68064	6.62121	6.62414	6.63033	6.61962	6.66994	6.68205	6.55704	6.64758	6.71502	6.61116	6.60956	-0.00325154	0.93895	-0.00528334	0.896402	-0.0163558	0.764735
ILMN_1656335	RIT1	7.06086	7.18529	7.20437	7.18206	7.2215	7.05221	7.25428	7.30163	7.3198	7.24778	7.18331	7.31969	-0.100086	0.169508	-0.0983388	0.202327	0.0416427	0.39719
ILMN_1656338	PTPRS	6.66415	6.66118	6.69822	6.65892	6.61546	6.71925	6.72221	6.67818	6.64169	6.6495	6.69787	6.61104	0.0217159	0.478213	0.0117394	0.779493	0.0278914	0.461114
ILMN_1656342	FBXO48	6.56595	6.71341	6.61386	6.57291	6.629	6.65034	6.63747	6.64314	6.65666	6.63191	6.69382	6.57757	-0.00335825	0.954156	-0.0170174	0.697687	0.011324	0.756218
ILMN_1656344	LOC653039	6.53945	6.57896	6.66852	6.48855	6.58197	6.57468	6.57165	6.62231	6.64314	6.55155	6.61852	6.57908	0.0125909	0.783474	-0.0346501	0.387256	0.0293133	0.366041
ILMN_1656361	LOC201175	6.88607	6.90541	6.79627	6.91696	6.81675	6.93529	6.96678	6.7459	6.88079	6.98117	6.90241	6.96697	-0.0876015	0.10209	-0.0605139	0.241906	-0.0856917	0.280309
ILMN_1656364	ASB12	6.61386	6.6273	6.6671	6.6029	6.59323	6.57606	6.59497	6.66106	6.61153	6.61153	6.57153	6.58072	0.0481606	0.0741575	0.00280416	0.855286	0.034594	0.21099
ILMN_1656368	ALDH4A1	7.91792	7.86257	7.68341	7.81039	7.70286	7.82534	7.82223	7.66612	8.03149	7.91406	7.88179	7.97574	-0.102561	0.248241	-0.144333	0.0382393	-0.0839132	0.485728
ILMN_1656369	C8orf4	6.56595	6.57896	6.54769	6.72062	6.54988	6.57468	6.71307	6.59708	6.59695	6.6206	6.59659	6.63349	-0.0526916	0.0202327	-0.00183333	0.974706	0.0188092	0.663984
ILMN_1656371	TRPA1	6.65845	6.64639	6.633	6.70411	6.68695	6.79162	6.6736	6.72311	6.65964	6.64266	6.64206	6.6569	-0.00125904	0.893208	0.0803544	0.0702922	0.0382459	0.12641
ILMN_1656372	PES1	7.74876	7.72104	7.74717	7.59799	7.48799	7.6683	7.87523	7.41666	7.82903	7.65239	7.65	7.60954	0.101681	0.00356052	-0.0525465	0.387816	0.0696654	0.659066
ILMN_1656373	BNC2	7.38695	7.3808	7.4464	7.28039	7.30865	7.22712	7.22158	7.35426	7.07151	7.27986	7.18982	7.24495	0.166507	0.00767526	0.0338465	0.394011	-0.0224221	0.80669
ILMN_1656376	LOC648256	6.7133	6.55602	6.63009	6.58924	6.62499	6.55845	6.63892	6.53932	6.60858	6.63191	6.58924	6.62706	0.0170709	0.736884	-0.0251773	0.344104	-0.0204634	0.562129
ILMN_1656378	NMT2	8.56112	8.50869	8.45899	8.41924	8.21983	8.40253	8.44505	8.44505	8.38036	8.38352	8.46694	8.50436	0.057994	0.278726	-0.104405	0.226808	-0.0281235	0.537201
ILMN_1656379	LOC643093	6.60895	6.63167	6.69114	6.72448	6.60993	6.56303	6.57165	6.70883	6.60142	6.54255	6.66652	6.68969	0.0110022	0.842289	-0.000438385	0.995035	-0.00561972	0.931943
ILMN_1656380	LOC124216	6.60142	6.68951	6.58986	6.64794	6.69949	6.60389	6.70446	6.50042	6.72255	6.63349	6.74064	6.50981	-0.00104877	0.989334	0.0224629	0.771208	0.0144938	0.889099
ILMN_1656382	BOLA2	7.21691	7.11625	7.13705	7.08934	6.96697	7.0737	7.13807	7.11473	7.23001	7.11625	7.05746	6.91458	0.12731	0.131425	0.0139093	0.854559	0.131509	0.13122
ILMN_1656383	SOHLH1	6.541	6.58047	6.5714	6.65761	6.60587	6.69753	6.55972	6.65964	6.61301	6.63941	6.66071	6.59061	-0.0659549	0.0510848	0.0234256	0.525033	-0.019454	0.613307
ILMN_1656386	SEC24D	7.24565	7.19963	7.21909	7.1989	7.39049	7.31313	7.03309	7.0674	7.12439	7.24778	7.19661	7.11314	0.0356143	0.438603	0.114996	0.166519	-0.110879	0.0795334
ILMN_1656393	PPP2R3A	7.83708	7.9863	7.86423	7.84518	7.72606	7.80945	7.93349	7.68526	7.8209	7.82667	7.81129	7.84174	0.0693064	0.212149	-0.0329999	0.415568	-0.0133517	0.862467
ILMN_1656395	MYOT	6.59659	6.61116	6.56099	6.6465	6.55256	6.53906	6.67066	6.61668	6.57582	6.60587	6.62584	6.54885	-0.00393689	0.892936	-0.014142	0.747006	0.0275345	0.485479
ILMN_1656399	TCEAL8	9.12289	9.1715	9.14144	9.17248	9.11348	9.21177	9.10062	9.12235	8.89493	9.3401	9.36967	9.44423	-0.239392	0.00216026	-0.21876	0.00655491	-0.345365	0.0118502
ILMN_1656401	LOC642295	6.55679	6.60179	6.7394	6.67842	6.6029	6.64902	6.5629	6.55845	6.66664	6.7385	6.5982	6.59708	-0.0119312	0.876869	-0.00114305	0.983465	-0.0485949	0.454784
ILMN_1656402	LOC440434	6.57222	6.59098	6.61534	6.61705	6.62742	6.58072	6.58611	6.51021	6.73985	6.66604	6.58774	6.56849	-0.0145758	0.675527	0.000976088	0.977834	0.00463358	0.952976
ILMN_1656404	ZNF251	6.66415	6.68812	6.73162	6.66852	6.60142	6.69359	6.68963	6.71776	6.75828	6.68438	6.69938	6.7585	-0.019456	0.552374	-0.0595785	0.169732	0.0078043	0.808507
ILMN_1656407	LOC643850	6.61534	6.67242	6.75338	6.6465	6.69591	6.69114	6.62169	6.60735	6.69185	6.67207	6.64206	6.6157	0.0371011	0.439181	0.0345735	0.20151	-0.00298155	0.927463
ILMN_1656409	STON1-GTF2A1L	6.50849	6.66699	6.69822	6.66994	6.65117	6.67489	6.57468	6.68064	6.6029	6.66071	6.59659	6.66474	-0.0161096	0.810039	0.024658	0.348279	-0.0212699	0.611073
ILMN_1656410	TRPC6	6.73388	6.59098	6.51455	6.56569	6.48601	6.62255	6.55014	6.54525	6.53945	6.57001	6.49376	6.55538	0.0734204	0.343466	0.0183667	0.709957	0.00522747	0.83531
ILMN_1656413	ZMPSTE24	9.70263	9.63141	9.62725	9.76298	9.75057	9.57648	9.25547	9.47326	9.33835	9.33033	9.46996	9.37511	0.261963	0.00543116	0.304876	0.0139141	-0.036109	0.658029
ILMN_1656415	CDKN2C	6.9808	6.95069	6.99639	7.04209	7.18397	6.97775	7.04941	7.08378	7.18685	6.95302	7.12216	6.93147	-0.0262532	0.692677	0.065724	0.485938	0.104464	0.226087
ILMN_1656419	RAB11FIP1	6.63216	6.71341	6.6569	6.5643	6.67042	6.69486	6.62462	6.61803	6.65046	6.60735	6.53634	6.68205	0.0589111	0.290898	0.0346129	0.583399	0.0224577	0.630716
ILMN_1656420	MGC3020	6.81548	6.80553	6.988	6.8243	6.87107	6.86738	6.79162	6.80885	6.94224	6.76767	6.74848	6.79475	0.0993699	0.177168	0.0839493	0.0140474	0.0772684	0.193208
ILMN_1656421	LOC653537	6.71731	6.62584	6.72277	6.74579	6.58761	6.66994	6.76138	6.68998	6.64025	6.87271	6.69787	6.69567	-0.0667814	0.372385	-0.0876395	0.303757	-0.0582171	0.442521
ILMN_1656422	GPR87	6.59341	6.64206	6.7394	6.61264	6.56874	6.64206	6.55014	6.73444	6.6901	6.61301	6.6376	6.57606	0.0494034	0.34787	-0.00107706	0.970965	0.0493369	0.44541
ILMN_1656424	SNRPE	7.91481	7.82774	7.53529	7.64213	7.61128	7.67692	7.92821	8.03423	7.82387	8.16442	8.07772	8.06369	-0.342664	0.0450617	-0.458499	0.000237757	-0.173176	0.064569
ILMN_1656427	C17orf39	7.2268	7.11162	7.28577	7.24335	7.30657	7.17168	7.28898	7.26638	7.2753	7.17612	7.21511	7.23805	-0.0016942	0.976578	0.0307763	0.513299	0.0671307	0.0251159
ILMN_1656429	GUCY2E	6.74937	6.76602	6.84616	6.7746	6.83253	6.79162	6.85396	6.78336	6.87482	6.78291	6.92665	6.79183	-0.0466135	0.446485	-0.0342126	0.528059	0.00358205	0.950395
ILMN_1656434	IP6K1	6.66994	6.64206	6.6569	6.68888	6.63337	6.69753	6.69114	6.64193	6.7018	6.6206	6.63167	6.64326	0.0244571	0.0779079	0.0414153	0.121662	0.046452	0.0764589
ILMN_1656436	RBMS1	6.67253	6.61116	6.66568	6.64494	6.60005	6.58511	6.57165	6.52058	6.61913	6.63796	6.59968	6.60476	0.03566	0.19329	-0.00409586	0.858959	-0.0436785	0.230191
ILMN_1656448	LOC642000	6.68917	6.59708	6.54923	6.55959	6.65428	6.61276	6.56722	6.63203	6.59385	6.57291	6.5541	6.58699	0.0404923	0.391167	0.0375451	0.265273	0.0263662	0.279275
ILMN_1656452	C16orf59	7.89603	7.82539	7.79287	7.78736	7.71372	7.76756	7.91956	7.84954	8.04976	7.98048	7.76373	7.98124	-0.0703891	0.420692	-0.152274	0.114411	0.0311316	0.755043
ILMN_1656463	C11orf73	8.30163	8.44592	8.35343	8.36959	8.28844	8.52928	8.57697	8.72041	8.69584	8.70474	8.68944	8.74081	-0.344668	0.00154389	-0.315893	0.012012	-0.0472571	0.370049
ILMN_1656472	GRAP	6.74097	6.70757	6.7063	6.67277	6.70883	6.68333	6.68205	6.66474	6.56557	6.6465	6.65213	6.64025	0.071986	0.00372145	0.0420186	0.0201504	-0.0088417	0.820265
ILMN_1656477	ARSA	6.69903	6.79345	6.76249	6.69718	6.69707	6.73219	6.67759	6.64061	6.66118	6.71925	6.7063	6.70307	0.0421157	0.209957	-0.000727516	0.957032	-0.0497435	0.0134633
ILMN_1656482	OSBPL2	7.69371	7.55226	7.73404	7.61216	7.56799	7.46144	7.52929	7.61216	7.74527	7.64073	7.64867	7.67889	0.0039078	0.948019	-0.108897	0.078002	-0.0271839	0.692752
ILMN_1656486	DNAJC10	7.20916	7.12963	7.17189	7.36925	7.3543	7.40929	7.11578	7.21241	7.03675	7.10714	7.13091	7.15612	0.0388371	0.223383	0.246226	0.000341934	-0.00974287	0.862384
ILMN_1656487	FGA	6.64974	6.69079	6.6382	6.62596	6.70365	6.6671	6.69996	6.68602	6.55959	6.68695	6.70359	6.71033	-0.0407102	0.0794781	-0.034718	0.213487	-0.0517628	0.315855
ILMN_1656492	LOC389422	6.6382	6.58949	6.58836	6.63337	6.64193	6.65034	6.60104	6.60327	6.6901	6.55743	6.63021	6.6538	-0.00846312	0.812101	0.0280669	0.394036	0.017657	0.690607
ILMN_1656495	NOTO	6.67253	6.82376	6.64086	6.66734	6.79486	6.6671	6.76138	6.61214	6.68864	6.63506	6.62437	6.65547	0.0740832	0.264726	0.0714654	0.175851	0.0490881	0.32747
ILMN_1656496	EPC2	6.71731	6.69775	6.8645	6.8052	6.77931	6.72209	6.71605	6.68602	6.75104	6.80348	6.75695	6.65237	0.0222546	0.763327	0.0312695	0.57283	-0.0198948	0.702521
ILMN_1656501	DUSP5	10.1652	10.1305	10.2138	10.0919	10.1203	10.1603	9.84811	9.9187	10.0101	9.7447	9.7929	9.69073	0.427059	0.00036158	0.381393	0.00042808	0.182858	0.0299215
ILMN_1656502	LOC643286	6.54255	6.60956	6.65249	6.50863	6.59186	6.68858	6.58311	6.58699	6.78237	6.48949	6.49376	6.60476	0.0721974	0.218194	0.0670201	0.35575	0.121484	0.184426
ILMN_1656504	ZNF304	6.77996	6.69079	6.7189	6.72062	6.81099	6.83485	6.7367	6.72788	6.80745	6.72584	6.72368	6.70446	0.0118914	0.684376	0.0708232	0.116386	0.0393499	0.205903
ILMN_1656509	LOC650611	6.63518	6.64494	6.53802	6.63191	6.65273	6.66994	6.69996	6.57544	6.6756	6.58035	6.67383	6.66177	-0.0325999	0.509074	0.0128762	0.702323	0.0116823	0.82005
ILMN_1656521	CGI-96	7.2186	7.14063	7.22704	7.14632	7.19902	7.04804	7.29151	7.25373	7.44653	7.32231	7.37832	7.18001	-0.0981186	0.206346	-0.162417	0.092463	0.0370431	0.680064
ILMN_1656525	SPG21	6.57884	6.59558	6.65535	6.61264	6.60587	6.66308	6.76005	6.69265	6.61913	6.6206	6.68835	6.67389	-0.0510215	0.175607	-0.0337523	0.285287	0.0296648	0.55089
ILMN_1656527	LOC390483	6.70607	6.7063	6.61815	6.62596	6.74853	6.65034	6.5468	6.5784	6.70607	6.56049	6.59968	6.62706	0.0810996	0.0821751	0.0792035	0.133416	0.01468	0.793173
ILMN_1656530	LOC642788	6.59659	6.67524	6.66118	6.70561	6.70607	6.66994	6.58311	6.82376	6.5714	6.60439	6.67242	6.72448	-0.0227557	0.619724	0.0267787	0.506808	-0.00767174	0.935658
ILMN_1656534	LOC645891	6.62828	6.65678	6.6453	6.72562	6.70745	6.77032	6.64794	6.53024	6.63312	6.6594	6.55538	6.688	0.0091926	0.834122	0.100202	0.0870528	-0.0304909	0.607039
ILMN_1656537	SNRPN	6.94077	6.8682	6.9506	6.98545	6.82874	6.89541	6.87389	6.94165	6.75684	6.80863	6.90365	6.89693	0.0501188	0.280057	0.0334611	0.5742	-0.0122791	0.8528
ILMN_1656540	RUVBL1	8.29171	8.21631	8.35582	8.41444	8.2584	8.22642	8.36573	8.38238	8.53303	8.33582	8.24876	8.33041	-0.0170503	0.746294	-0.00524001	0.939201	0.122051	0.112552
ILMN_1656545	LOC652793	6.64566	6.49909	6.56341	6.54872	6.63615	6.62401	6.60993	6.60735	6.61005	6.52045	6.57291	6.6173	-0.000834802	0.987681	0.0327397	0.449834	0.0388896	0.237231
ILMN_1656546	ARHGEF11	6.52621	6.64783	6.70238	6.57291	6.57026	6.59074	6.59211	6.53777	6.6256	6.67337	6.66522	6.62231	-0.0281582	0.632189	-0.0756618	0.0114504	-0.0684736	0.0852399
ILMN_1656553	LOC653160	6.67112	6.68951	6.67524	6.77362	6.79173	6.56303	6.57468	6.65678	6.64902	6.67742	6.64639	6.62536	0.028905	0.147346	0.0597377	0.470017	-0.0228927	0.490975
ILMN_1656554	OR4M2	6.7289	6.69079	6.70238	6.80992	6.78051	6.78007	6.73951	6.72924	6.65964	6.69869	6.67383	6.6632	0.0287876	0.135333	0.111596	0.00150411	0.0308931	0.319535
ILMN_1656557	ARMC8	6.67253	6.63627	6.53971	6.66734	6.52281	6.62718	6.68485	6.60895	6.63155	6.69451	6.61852	6.62706	-0.030527	0.546172	-0.0409202	0.453392	-0.00491309	0.888596
ILMN_1656560	PARM1	6.83253	6.76602	6.8522	6.8158	6.79486	6.72323	6.72958	6.80058	6.71776	6.75828	6.66071	6.7746	0.0857224	0.123789	0.0467652	0.360011	0.0181118	0.701513
ILMN_1656562	LOC653214	6.68345	6.6435	6.59422	6.66734	6.68835	6.65464	6.72516	6.72311	6.67701	6.68695	6.64338	6.6173	-0.00881796	0.801605	0.0209007	0.406827	0.0592181	0.0824646
ILMN_1656563	PAX8	6.68508	6.60327	6.70503	6.73985	6.67042	6.67489	6.68649	6.7712	6.7367	6.67742	6.72823	6.70307	-0.0384436	0.326524	-0.0078543	0.784068	0.0285556	0.375101
ILMN_1656574	PCGF6	9.04784	8.75215	9.01756	9.04306	9.13394	8.96904	8.62366	8.85832	8.84976	9.01175	8.87121	8.94079	-0.00206954	0.984831	0.107425	0.161339	-0.164007	0.132117
ILMN_1656576	ATCAY	6.57051	6.74512	6.59273	6.57884	6.66616	6.58949	6.70446	6.68205	6.55512	6.52215	6.69382	6.64639	0.0153363	0.848039	-0.00928952	0.880727	0.0264244	0.721789
ILMN_1656577	KCNH7	6.45838	6.56366	6.58836	6.56278	6.56443	6.62828	6.51311	6.61509	6.55512	6.59857	6.58486	6.65237	-0.0751271	0.169329	-0.0267702	0.420133	-0.0508226	0.231495
ILMN_1656579	LOC642077	6.63118	6.6273	6.64386	6.67136	6.61399	6.6613	6.66598	6.57544	6.69324	6.66071	6.63917	6.59857	0.00129994	0.948441	0.0160701	0.561166	0.012075	0.77776
ILMN_1656589	LOC652537	6.59993	6.61962	6.60327	6.60722	6.61399	6.65345	6.58022	6.64061	6.77647	6.64086	6.58348	6.62377	-0.00843013	0.665021	0.00884886	0.71171	0.0497296	0.457082
ILMN_1656593	AK5	6.64422	6.57896	6.66947	6.63482	6.63615	6.54962	6.6465	6.81708	6.62096	6.63796	6.59373	6.61411	0.015617	0.628415	-0.00840647	0.801842	0.0795805	0.274298
ILMN_1656595	STAC3	6.73263	6.58649	6.55231	6.68888	6.65273	6.68975	6.59211	6.6307	6.64025	6.60587	6.67971	6.6756	-0.0299137	0.645678	0.0233941	0.433301	-0.0327051	0.309406
ILMN_1656600	LOC643186	6.61214	6.60327	6.77964	6.62462	6.64842	6.60241	6.54229	6.56741	6.65345	6.6206	6.68543	6.68637	0.000883978	0.989195	-0.0389847	0.201074	-0.0764195	0.129263
ILMN_1656604	LOC644420	6.62096	6.64061	6.59584	6.6756	6.58335	6.58361	6.59919	6.64314	6.70469	6.65523	6.71536	6.64639	-0.0531895	0.102868	-0.0581417	0.196747	-0.0233227	0.567594
ILMN_1656615	FLJ20397	6.57222	6.78803	6.66568	6.6273	6.701	6.64614	6.71605	6.67018	6.62718	6.59248	6.72686	6.60956	0.0323429	0.690132	0.0151754	0.766161	0.0281655	0.599213
ILMN_1656617	LOC387856	6.58285	6.63167	6.55231	6.57443	6.60142	6.67159	6.59621	6.55998	6.62864	6.51744	6.63167	6.52045	0.0324235	0.503173	0.0592924	0.279542	0.038421	0.417057
ILMN_1656619	LOC652553	6.57222	6.54022	6.61681	6.56861	6.56569	6.50856	6.56443	6.64998	6.76591	6.54087	6.62267	6.54409	0.00720382	0.845965	-0.0215896	0.550161	0.0908955	0.22988
ILMN_1656621	CHMP2A	7.07623	7.12749	7.01367	7.0094	6.93667	6.93205	7.16405	7.05804	7.25411	7.28784	7.2837	7.23192	-0.195355	0.00647861	-0.308446	0.000561549	-0.109086	0.140434
ILMN_1656624	LOC653481	6.67818	6.68205	6.54923	6.63627	6.68578	6.63506	6.68789	6.70607	6.62231	6.58197	6.50546	6.62231	0.0665736	0.296425	0.0824598	0.096573	0.102175	0.0748286
ILMN_1656625	RPS24	13.3211	13.3098	13.378	13.4636	13.4783	13.4951	13.2983	13.5521	13.2327	13.3621	13.456	13.4369	-0.0819864	0.0824976	0.0606651	0.113613	-0.0572616	0.602791
ILMN_1656628	WDR4	9.3347	9.27969	9.47326	9.32298	9.15984	9.14643	9.55256	9.33897	9.50733	9.17062	9.26813	9.14185	0.169014	0.0707894	0.0162154	0.824287	0.272755	0.0223942
ILMN_1656630	LOC644891	6.58448	6.71033	6.66568	6.57582	6.60439	6.72686	6.58022	6.6376	6.51442	6.66888	6.58774	6.6538	0.0166897	0.726496	-0.00111792	0.984063	-0.0593957	0.243348
ILMN_1656635	LOC652003	6.56303	6.69775	6.53802	6.65237	6.55845	6.56456	6.6157	6.54074	6.61153	6.53932	6.64938	6.50426	0.0352846	0.62186	0.0274712	0.632917	0.0250051	0.643449
ILMN_1656636	LOC390427	6.64098	6.56557	6.65535	6.58649	6.68205	6.57291	6.59211	6.64193	6.61913	6.56849	6.64938	6.70146	-0.0191432	0.708484	-0.0259611	0.642116	-0.0220516	0.6215
ILMN_1656637	LOC391092	6.49802	6.63772	6.56341	6.63191	6.63747	6.54641	6.68789	6.68064	6.63458	6.58197	6.66379	6.61913	-0.0552482	0.302977	-0.0163696	0.68722	0.0460672	0.186764
ILMN_1656638	BHMT	6.67524	6.76049	6.77131	6.70986	6.7412	6.69242	6.70745	6.7712	6.67253	6.79702	6.70359	6.7746	-0.0227217	0.612524	-0.0439114	0.236626	-0.041343	0.363369
ILMN_1656647	LOC649944	6.66285	6.53518	6.54923	6.61852	6.59186	6.60845	6.54229	6.61067	6.58348	6.62194	6.59659	6.56329	-0.0115204	0.805704	0.0123385	0.544994	-0.0151258	0.593925
ILMN_1656655	LOC654046	6.65988	6.63772	6.67242	6.60439	6.62377	6.6613	6.69834	6.64602	6.56849	6.66604	6.72095	6.65547	-0.0241492	0.347157	-0.0510001	0.124362	-0.0432046	0.370186
ILMN_1656656	COX19	8.30355	8.22474	8.20979	8.14363	8.08735	8.12902	8.17784	8.18264	8.1994	8.23407	8.39828	8.30885	-0.0677069	0.290759	-0.193735	0.0183663	-0.12711	0.056816
ILMN_1656662	LOC731365	12.6765	12.623	12.5917	12.6334	12.6723	12.741	12.8166	13.026	12.5579	12.5628	12.6369	12.6602	0.0104447	0.799161	0.0623003	0.221289	0.180212	0.263115
ILMN_1656670	HLA-G	7.33264	7.28814	7.29448	7.37548	7.35246	7.43382	7.41835	7.38073	7.52036	7.18998	7.37182	7.32604	0.00913523	0.879066	0.0913057	0.201104	0.143862	0.104403
ILMN_1656672	LOC650076	6.68917	6.61264	6.71467	6.61558	6.54377	6.57468	6.8142	6.66379	6.7149	6.70561	6.73128	6.55385	0.0085833	0.898667	-0.0855659	0.221498	0.0673865	0.395192
ILMN_1656676	ZYG11B	9.07447	8.93551	8.97953	8.92687	8.9082	8.95417	8.74688	8.88095	8.71056	8.86506	8.80679	8.80331	0.171451	0.0198211	0.104698	0.0121573	-0.0455868	0.457942
ILMN_1656678	SUZ12P	6.60587	6.75472	6.73162	6.72062	6.72015	6.64482	6.69405	6.59198	6.67407	6.68041	6.67383	6.73219	0.00192733	0.970981	-0.000279542	0.993286	-0.0421113	0.310239
ILMN_1656682	AZIN1	10.8378	10.921	10.7786	10.9922	10.9077	10.9751	10.6509	10.8245	10.512	10.655	10.6854	10.529	0.222662	0.0244516	0.335206	0.00352171	0.0393454	0.720082
ILMN_1656684	CCR3	6.55998	6.63929	6.53802	6.49123	6.48217	6.61411	6.51927	6.60463	6.53011	6.60883	6.61705	6.5841	-0.0242321	0.494975	-0.0741587	0.164844	-0.0519902	0.143218
ILMN_1656691	FBXO4	7.74171	7.70068	7.65	7.68086	7.67759	7.42709	7.61847	7.79998	7.56571	7.71947	7.74323	7.82534	-0.0652156	0.19219	-0.1675	0.136103	-0.101294	0.263161
ILMN_1656698	LOC644342	6.60735	6.59248	6.6671	6.6273	6.69591	6.59248	6.57657	6.60593	6.60858	6.6901	6.63167	6.55231	-0.0023812	0.961182	0.0138696	0.795914	-0.0276659	0.538919
ILMN_1656706	LCE2D	6.64098	6.56709	6.58511	6.49123	6.63033	6.65874	6.5629	6.52229	6.58924	6.63506	6.53479	6.64794	-0.00820348	0.855063	-0.0124971	0.852232	-0.0477889	0.3057
ILMN_1656713	IGLL1	6.59993	6.57619	6.56341	6.69591	6.55845	6.56595	6.52647	6.62231	6.59844	6.60883	6.65213	6.63191	-0.0511113	0.0360415	-0.0241883	0.629276	-0.0485505	0.197007
ILMN_1656715	THSD7A	6.76327	6.65535	6.63572	6.72448	6.69949	6.65345	6.64193	6.64193	6.63735	6.67483	6.53802	6.69996	0.0471745	0.502345	0.0548665	0.370608	0.00280072	0.9583
ILMN_1656718	DEF8	8.28649	8.41731	8.60785	8.27716	8.33645	8.4033	8.66828	8.3956	8.5412	8.53632	8.64092	8.65849	-0.174696	0.158089	-0.272935	0.00662979	-0.0768822	0.429298
ILMN_1656720	LOC391771	6.49802	6.53699	6.63723	6.64494	6.54216	6.60845	6.67066	6.50505	6.53466	6.59993	6.55704	6.47402	0.0137504	0.816664	0.0548546	0.313825	0.0264579	0.69597
ILMN_1656722	LOC646971	6.57557	6.66118	6.55819	6.73985	6.4709	6.5541	6.64494	6.67136	6.75227	6.55743	6.59509	6.59385	0.0161904	0.660118	0.0061597	0.942647	0.107402	0.0359827
ILMN_1656724	OR14A16	6.55998	6.54022	6.55959	6.59223	6.62499	6.51606	6.56867	6.67277	6.62231	6.67883	6.58197	6.69857	-0.0998625	0.0525835	-0.075363	0.194183	-0.0318732	0.534205
ILMN_1656732	LOC653146	6.69498	6.59098	6.63723	6.70722	6.67524	6.59385	6.57846	6.57544	6.5486	6.53167	6.62875	6.671	0.030588	0.581349	0.0482938	0.416098	-0.0429795	0.367314
ILMN_1656743	MIA2	6.59048	6.61116	6.53971	6.62316	6.46331	6.62133	6.6736	6.64602	6.58348	6.6594	6.56849	6.63021	-0.0389148	0.318552	-0.0501023	0.446258	0.0150006	0.711752
ILMN_1656744	LOC648054	6.68777	6.66285	6.66273	6.67277	6.69451	6.7063	6.64494	6.68847	6.67853	6.7341	6.69787	6.60808	-0.00890565	0.827862	0.0111743	0.78725	-0.00937139	0.825005
ILMN_1656746	LOC648154	6.63216	6.57468	6.59273	6.61558	6.62742	6.63929	6.55155	6.64193	6.62718	6.56226	6.58047	6.6003	0.0188445	0.40401	0.0464218	0.0230219	0.0258771	0.438053
ILMN_1656761	TGIF1	6.70895	6.71341	6.72788	6.67959	6.68205	6.62011	6.669	6.70607	6.63735	6.69149	6.65666	6.71788	0.0280689	0.206266	-0.0280955	0.355425	-0.0178713	0.538757
ILMN_1656767	LOC647946	6.55845	6.59708	6.6453	6.66994	6.69312	6.52222	6.52065	6.54074	6.71925	6.6029	6.68392	6.59385	-0.0266145	0.523248	0.00153776	0.981003	-0.033344	0.655586
ILMN_1656772	LOC642334	6.56874	6.59248	6.7063	6.63929	6.58335	6.62011	6.59621	6.5541	6.58786	6.6632	6.55538	6.53284	0.0386995	0.54433	0.0304442	0.522072	-0.00441715	0.921739
ILMN_1656779	FLJ43950	6.53128	6.66285	6.65535	6.63929	6.59621	6.61276	6.55308	6.57229	6.63155	6.61301	6.68835	6.57291	-0.00826266	0.886734	-0.00866855	0.821982	-0.0391156	0.396827
ILMN_1656791	RPS6	13.0315	12.9851	13.0538	13.2824	13.2135	13.2164	13.1806	13.2432	13.0806	13.1683	13.2387	13.2327	-0.189762	0.00330428	0.0241606	0.490187	-0.0451038	0.43812
ILMN_1656792	FLYWCH1	6.79875	6.82493	6.77406	6.73128	6.75205	6.78977	6.86533	6.85323	6.96054	6.8261	6.82757	6.79183	-0.0159222	0.443874	-0.0574697	0.0501614	0.0778651	0.0958351
ILMN_1656798	TIMM17A	6.76459	6.79616	6.84877	6.84887	6.84428	6.86275	6.75584	6.83106	6.77482	6.81548	6.83758	6.78537	-0.00963998	0.754969	0.039154	0.0720208	-0.0255696	0.400179
ILMN_1656801	LOC651272	6.59993	6.64206	6.66273	6.51258	6.62742	6.63361	6.56125	6.69405	6.63312	6.63046	6.66225	6.66	-0.0159961	0.491112	-0.0596966	0.215993	-0.021429	0.618192
ILMN_1656802	LOXL2	6.69068	6.69242	6.61815	6.61852	6.56722	6.56722	6.62608	6.59993	6.58223	6.58197	6.62584	6.56011	0.0777796	0.0671714	-0.00498565	0.856218	0.0134426	0.59254
ILMN_1656807	RPL27	12.9533	12.8197	12.8917	12.801	12.8378	12.815	12.9292	12.8609	12.938	12.8349	12.801	12.842	0.0622816	0.200142	-0.00804265	0.653018	0.0834017	0.0385185
ILMN_1656812	ITGB1BP3	6.54885	6.67524	6.67923	6.61558	6.64055	6.6645	6.65535	6.67524	6.73072	6.7289	6.69938	6.55538	-0.0267789	0.716168	-0.0210089	0.72394	0.0258839	0.679266
ILMN_1656817	LOC648240	6.70607	6.65093	6.6453	6.5982	6.57606	6.43827	6.55972	6.59198	6.67112	6.61478	6.59373	6.58561	0.069395	0.0308999	-0.0605297	0.299146	0.00956706	0.793646
ILMN_1656818	GPR141	6.69775	6.61558	6.62255	6.58486	6.62377	6.66994	6.63337	6.70215	6.54255	6.6538	6.58486	6.58911	0.0360402	0.35504	0.0169327	0.636899	0.0167656	0.76029
ILMN_1656822	DNM2	7.76949	7.72745	7.81548	7.75921	7.7682	7.79933	7.5633	7.75905	7.7682	7.73872	7.70712	7.68902	0.0591837	0.113289	0.0639567	0.0278601	-0.014774	0.839529
ILMN_1656826	SH3RF1	7.048	7.08515	7.07151	7.28039	7.18397	7.13931	6.96486	6.9898	6.9455	7.01445	6.96592	6.90561	0.106224	0.033219	0.23923	0.0101573	0.00472444	0.896185
ILMN_1656837	RBP1	6.76459	6.65535	6.62255	6.57013	6.56569	6.64061	6.629	6.60735	6.60142	6.6465	6.61705	6.62706	0.0506262	0.312059	-0.0380583	0.213642	-0.0176161	0.217324
ILMN_1656840	VPS13D	6.74221	6.69509	6.7394	6.8158	6.69451	6.7449	6.67912	6.69532	6.77032	6.6901	6.82895	6.73365	-0.0253321	0.593608	0.000835095	0.988407	-0.0359831	0.509153
ILMN_1656842	LOC643365	6.59659	6.64938	6.75472	6.69996	6.62231	6.59993	6.64794	6.72436	6.64902	6.59708	6.53971	6.62706	0.0789487	0.211112	0.0527864	0.254303	0.0858288	0.0756879
ILMN_1656846	GBA2	6.74501	6.63772	6.60463	6.67701	6.69068	6.68205	6.65237	6.57971	6.68864	6.57594	6.66794	6.67389	0.0231986	0.683745	0.0439884	0.240671	0.000984314	0.98362
ILMN_1656847	LOC643771	6.68205	6.48022	6.64386	6.51258	6.6087	6.60129	6.6538	6.57405	6.74825	6.59708	6.56659	6.64794	-0.00182548	0.979351	-0.0296752	0.488513	0.0548336	0.380314
ILMN_1656849	SLC26A8	6.61681	6.52229	6.60624	6.43827	6.65547	6.54962	6.51172	6.57971	6.63155	6.64086	6.52366	6.55385	0.00898938	0.855009	-0.0250026	0.745492	0.00154028	0.97661
ILMN_1656853	LOC391761	6.54731	6.60327	6.68205	6.62316	6.57165	6.70146	6.60241	6.6307	6.57291	6.66734	6.56659	6.69114	-0.0308138	0.602861	-0.00960096	0.866746	-0.0396831	0.394783
ILMN_1656863	LOC645655	6.61534	6.63167	6.4761	6.49802	6.52555	6.55256	6.58911	6.58536	6.61005	6.61478	6.55538	6.48614	0.0222677	0.736791	-0.026722	0.544202	0.0427405	0.323155
ILMN_1656865	LOC645602	6.58035	6.57468	6.66415	6.51258	6.58047	6.60129	6.53479	6.64314	6.55653	6.56226	6.52529	6.64639	0.0284139	0.570601	-0.0131972	0.78266	0.000173093	0.997338
ILMN_1656867	LOC391013	6.58035	6.49742	6.66415	6.65892	6.54525	6.50373	6.65237	6.54808	6.66249	6.55155	6.56329	6.63191	-0.00160924	0.977762	-0.0129475	0.818092	0.0387274	0.431653
ILMN_1656868	LOC23117	9.66295	9.64566	9.70189	9.65066	9.64377	9.74568	9.62291	9.48102	9.46996	9.34353	9.47623	9.39633	0.264804	0.00323642	0.274671	0.00562033	0.119266	0.129236
ILMN_1656869	LGALS9B	6.93922	6.8551	6.82069	6.73766	6.8338	6.84396	6.69248	6.88633	6.75516	6.83485	6.78847	6.88439	0.0357631	0.46935	-0.0307635	0.520727	-0.0579146	0.413155
ILMN_1656871	C16orf50	6.55218	6.58949	6.74097	6.64338	6.62377	6.65034	6.68205	6.54384	6.53777	6.58498	6.55244	6.42125	0.10799	0.230392	0.119606	0.0776269	0.0683253	0.376452
ILMN_1656879	LOC643237	6.61043	6.5821	6.62718	6.58185	6.60005	6.54962	6.59061	6.56741	6.58924	6.51744	6.54125	6.5841	0.0589717	0.0662931	0.0295764	0.293043	0.0348207	0.171072
ILMN_1656882	LOC390712	6.59173	6.63772	6.71616	6.63929	6.57316	6.60389	6.64193	6.61509	6.58498	6.64806	6.61411	6.61913	0.0214355	0.601289	-0.0216526	0.377552	-0.0130975	0.53972
ILMN_1656883	LOC643201	6.67524	6.60636	6.59422	6.67277	6.6087	6.61705	6.66746	6.60327	6.541	6.59993	6.61987	6.58072	0.0251022	0.415216	0.0326691	0.229642	0.00373772	0.926795
ILMN_1656886	LIN37	7.45628	7.60829	7.45382	7.64666	7.63983	7.48759	7.67944	7.76829	7.72542	7.56393	7.52625	7.70148	-0.0910898	0.28463	-0.00586089	0.940976	0.12716	0.0978502
ILMN_1656898	LOC653324	8.30126	8.02528	8.02074	7.75559	7.89717	7.93984	8.50889	8.33022	8.61647	8.57612	8.35958	8.43176	-0.340058	0.0390576	-0.591619	0.00219771	0.0293736	0.793504
ILMN_1656900	SULT1A1	7.39234	7.56097	7.60255	7.29727	7.44412	7.50764	7.53373	7.58386	7.5919	7.5909	7.481	7.65045	-0.0554981	0.531866	-0.157774	0.11869	-0.00428843	0.93924
ILMN_1656902	HECTD3	8.04651	7.98713	7.9304	7.84767	7.87518	7.84365	7.95745	7.85537	8.07431	7.80349	7.83052	7.95769	0.124108	0.0998051	-0.00840197	0.871038	0.0984711	0.281246
ILMN_1656904	SLC1A4	6.68649	6.83894	6.77131	6.78291	6.72788	6.84031	6.75861	6.81569	6.76899	6.81088	6.71296	6.79021	-0.00576808	0.91892	0.0123509	0.79313	0.00974959	0.791989
ILMN_1656907	LOC651468	6.72221	6.60796	6.52608	6.54756	6.60993	6.63095	6.62328	6.54384	6.53777	6.63506	6.5446	6.63675	0.0132776	0.846974	-0.00932654	0.82457	-0.0371776	0.416396
ILMN_1656909	RGPD5	6.64422	6.65237	6.63421	6.6756	6.64842	6.72686	6.76293	6.70215	6.67853	6.62742	6.61411	6.64326	0.0153368	0.197224	0.0553631	0.0866456	0.0862758	0.0312527
ILMN_1656910	TRIM6	7.04069	7.09926	6.97785	7.14547	6.93534	7.05943	7.00712	7.04804	6.91179	6.97075	7.03227	7.0508	0.021321	0.642965	0.0288027	0.683344	-0.0289599	0.571586
ILMN_1656913	MDH1	10.7478	10.7786	10.9302	10.9683	10.9956	11.1328	10.8653	11.0492	10.7057	10.9527	11.0033	10.8506	-0.116667	0.180856	0.0967034	0.227303	-0.0621501	0.598836
ILMN_1656915	PSD3	6.81814	6.7385	6.76105	6.73128	6.81974	6.77263	6.8679	6.74736	6.85407	6.83758	6.79788	6.79826	-0.0386805	0.22685	-0.036693	0.270898	0.0118663	0.783046
ILMN_1656920	CRIP1	7.02291	6.85095	7.00688	6.93422	6.7412	6.87645	6.99045	6.86243	7.0039	6.9235	6.92073	6.96903	0.0224924	0.713447	-0.0871296	0.215705	0.0145087	0.776277
ILMN_1656921	LOC402634	6.60895	6.51297	6.4761	6.59968	6.59894	6.56722	6.57165	6.58536	6.46697	6.60587	6.62584	6.55845	-0.0640402	0.222259	-0.00810469	0.738759	-0.0553907	0.261419
ILMN_1656925	LOC401180	6.66994	6.6273	6.66415	6.6901	6.72504	6.66852	6.58611	6.77614	6.73844	6.62194	6.62875	6.75983	-0.0163808	0.744062	0.0243781	0.636885	0.0300536	0.703186
ILMN_1656927	SEMA5A	6.45098	6.63021	6.54615	6.52229	6.49376	6.60389	6.54847	6.5541	6.58924	6.60587	6.58486	6.50241	-0.0219309	0.735909	-0.024396	0.621531	-0.000441431	0.990278
ILMN_1656933	NKPD1	6.62377	6.60327	6.52032	6.54872	6.6029	6.62961	6.50081	6.49069	6.69625	6.50625	6.54615	6.66474	0.0100781	0.868581	0.0213691	0.708526	-0.00979257	0.910809
ILMN_1656934	REPS2	7.07277	6.98838	7.00902	6.97862	6.96697	6.92734	6.89959	6.94837	6.95924	6.98554	6.9008	6.90561	0.0927395	0.0683282	0.0269944	0.440567	0.00508295	0.88518
ILMN_1656938	LOC731486	6.69625	6.84161	6.8645	6.81515	6.85769	6.86923	6.86037	6.82133	6.80885	6.82451	6.88444	6.8763	-0.0609627	0.336965	-0.0143923	0.595007	-0.0315657	0.264656
ILMN_1656939	LOC400099	6.72346	6.73162	6.86717	6.58486	6.82874	6.67337	6.78597	6.71639	6.66829	6.72743	6.75817	6.73365	0.0343315	0.510155	-0.0440982	0.572793	-0.0162044	0.671099
ILMN_1656940	ABLIM3	6.72641	6.72573	6.70377	6.79497	6.70365	6.71548	6.72799	6.68345	6.78095	6.75561	6.80585	6.73072	-0.0454257	0.123177	-0.0260285	0.511879	-0.0332623	0.405534
ILMN_1656942	PRICKLE3	6.68205	6.71913	6.79885	6.72981	6.74725	6.75644	6.65237	6.87926	6.76591	6.70825	6.63167	6.7585	0.03387	0.538929	0.0450268	0.298251	0.0663733	0.427091
ILMN_1656949	LOC651723	6.70607	6.75205	6.57884	6.64494	6.68064	6.6658	6.59211	6.67277	6.58047	6.66462	6.64482	6.63506	0.0308157	0.588941	0.0156276	0.312065	-0.0330536	0.336596
ILMN_1656951	APCDD1	6.65547	6.76922	6.70238	6.69591	6.63892	6.60129	6.68345	6.71353	6.7242	6.71227	6.75244	6.71788	-0.0185058	0.627937	-0.0821544	0.0531429	-0.0204697	0.307305
ILMN_1656955	PCDHGC3	6.57557	6.65535	6.62255	6.62316	6.65964	6.71925	6.59919	6.69532	6.58786	6.63506	6.6273	6.52529	0.0219403	0.631143	0.0714663	0.18833	0.0315738	0.555375
ILMN_1656962	LOC401019	13.337	13.3249	13.4132	13.4951	13.3211	13.4441	13.4171	13.4922	13.5646	13.5044	13.5044	13.378	-0.103917	0.108156	-0.0421903	0.561105	0.0290212	0.653423
ILMN_1656963	LOC652242	6.53634	6.64639	6.62718	6.60439	6.63747	6.54641	6.61141	6.56741	6.64602	6.51744	6.59659	6.64326	0.0175413	0.743425	0.0103277	0.831029	0.022519	0.629683
ILMN_1656977	HIBCH	8.12384	8.11776	7.94223	8.06795	7.98725	8.10304	7.87692	8.03671	7.97466	8.04628	8.13538	8.02999	-0.00926967	0.8981	-0.0178028	0.726359	-0.107787	0.131032
ILMN_1656979	ABO	6.59659	6.51613	6.58348	6.60722	6.57165	6.57468	6.55308	6.6489	6.62389	6.59993	6.63917	6.60636	-0.0497538	0.147187	-0.030636	0.139615	-0.00652673	0.844325
ILMN_1656981	LOC388160	6.60142	6.65678	6.59757	6.62145	6.61399	6.69486	6.70273	6.5177	6.65666	6.49589	6.58348	6.69114	0.028419	0.658448	0.0532614	0.43929	0.0355276	0.67716
ILMN_1656988	LOC648533	6.59048	6.6435	6.65249	6.6029	6.61129	6.58072	6.62462	6.53479	6.64758	6.6029	6.49376	6.56329	0.0755074	0.112976	0.0449862	0.246591	0.0490128	0.355218
ILMN_1656992	NLRP10	6.75193	6.79064	6.76756	6.74232	6.73884	6.85707	6.77285	6.80058	6.75361	6.77784	6.79075	6.73805	0.00116646	0.955026	0.0105309	0.814171	0.00680154	0.76129
ILMN_1656993	LOC651580	6.54731	6.65237	6.62414	6.54756	6.5366	6.59385	6.60104	6.55256	6.55193	6.56557	6.61411	6.59061	0.017842	0.631146	-0.0307622	0.242566	-0.0215866	0.371609
ILMN_1656998	LOC653555	6.63675	6.71473	6.70895	6.65237	6.60587	6.64902	6.6465	6.60327	6.66664	6.63941	6.6376	6.66	0.0411424	0.189976	-0.00991579	0.582607	-0.00686473	0.748997
ILMN_1657002	OR51B5	6.6195	6.63627	6.61681	6.68345	6.67806	6.63361	6.58611	6.73585	6.59086	6.54255	6.6594	6.64794	0.00756187	0.85075	0.0484125	0.296963	0.0209768	0.750695
ILMN_1657009	NFASC	6.75071	6.76349	6.70757	6.74467	6.75205	6.72062	6.81291	6.76293	6.69185	6.78532	6.76597	6.72579	-0.0184366	0.491352	-0.0199138	0.374385	-0.00312744	0.940332
ILMN_1657010	LOC645879	6.61681	6.62121	6.62718	6.62011	6.67042	6.56722	6.55819	6.62377	6.59844	6.6632	6.65797	6.66794	-0.0413048	0.000578319	-0.0437883	0.217325	-0.0695682	0.0227065
ILMN_1657011	LOC286208	7.05384	7.12406	7.02373	7.21511	7.14842	7.13305	7.19068	7.16597	7.30018	7.09427	7.16422	7.03657	-0.0311456	0.546897	0.0671725	0.207149	0.120587	0.0948595
ILMN_1657022	LOC654174	6.82821	6.69509	6.77526	6.629	6.72788	6.82916	6.70584	6.77756	6.73072	6.74097	6.79075	6.74389	0.00765198	0.86404	-0.029856	0.64483	-0.0204958	0.482415
ILMN_1657033	LOC647519	6.6029	6.58811	6.67665	6.64938	6.64055	6.69486	6.58911	6.60463	6.54409	6.58961	6.67971	6.62231	-0.00798506	0.843794	0.0310545	0.376579	-0.0512629	0.184246
ILMN_1657039	FILIP1	6.69219	6.71913	6.70238	6.73884	6.65117	6.63361	6.65976	6.61386	6.70607	6.72459	6.60389	6.66177	0.041149	0.313574	0.011123	0.827016	-0.00352137	0.939859
ILMN_1657041	LOC645165	6.71462	6.68205	6.64674	6.65369	6.67806	6.72924	6.61288	6.59857	6.68462	6.70825	6.64783	6.56696	0.0401218	0.426571	0.0459842	0.379548	-0.00899006	0.862872
ILMN_1657044	STARD6	6.63965	6.6435	6.59584	6.67842	6.55116	6.64061	6.65237	6.63349	6.61595	6.59403	6.61116	6.65237	0.00714271	0.772558	0.00420826	0.924135	0.0147488	0.506859
ILMN_1657045	ABR	6.56874	6.59098	6.58185	6.60117	6.63179	6.61852	6.669	6.64458	6.63312	6.68847	6.58624	6.61104	-0.0480564	0.201308	-0.0114221	0.739468	0.020319	0.566357
ILMN_1657050	ARSK	6.80424	6.69775	6.69671	6.73128	6.78803	6.70503	6.78183	6.72788	6.64602	6.79183	6.60969	6.70146	0.0319096	0.641907	0.0404546	0.523956	0.0175834	0.802369
ILMN_1657056	LOC649993	6.56734	6.59098	6.59422	6.56278	6.57606	6.64902	6.54229	6.62377	6.60587	6.53777	6.62127	6.63021	-0.0122324	0.710057	-0.000461612	0.991305	-0.00577209	0.887917
ILMN_1657058	PPIL6	6.68917	6.63337	6.70238	6.65761	6.7048	6.7459	6.74097	6.64602	6.75227	6.7839	6.77701	6.76735	-0.101115	0.00957253	-0.0733155	0.0476056	-0.0629982	0.137804
ILMN_1657064	C6orf70	7.74171	7.79941	7.64273	7.51525	7.63532	7.5605	7.56653	7.64538	7.54088	7.49859	7.48883	7.63777	0.186223	0.0485499	0.0286238	0.65556	0.0425323	0.500298
ILMN_1657074	MUC3B	6.57557	6.55269	6.5714	6.56569	6.61264	6.63095	6.58761	6.68064	6.52685	6.53621	6.69382	6.58911	-0.0398283	0.443051	-0.00328741	0.950949	-0.00801118	0.906967
ILMN_1657077	SOCS6	6.77131	6.85095	6.62255	6.68626	6.71021	6.71673	6.67207	6.73726	6.7255	6.58961	6.67242	6.7585	0.0747604	0.417669	0.030891	0.567383	0.0381024	0.509857
ILMN_1657079	LOC652077	6.68508	6.64494	6.8358	6.6658	6.66746	6.57165	6.74512	6.67277	6.66664	6.796	6.68835	6.51311	0.0561248	0.607522	-0.0308457	0.744482	0.0290263	0.753253
ILMN_1657086	LOC440508	6.6658	6.68064	6.59584	6.65369	6.61681	6.56861	6.6538	6.67136	6.55193	6.58035	6.68392	6.64794	0.0100249	0.814759	-0.024367	0.566875	-0.0117074	0.81945
ILMN_1657087	ZNF533	6.78269	6.79616	6.78352	6.79777	6.7341	6.74859	6.76999	6.88835	6.6901	6.80713	6.73377	6.72579	0.0318945	0.291206	0.00459278	0.893711	0.02725	0.688288
ILMN_1657095	STARD3	7.14778	7.11344	7.18715	7.14922	7.04032	7.14335	7.10645	7.0962	7.14627	6.99206	6.98212	7.0039	0.156767	0.00212301	0.118273	0.0301332	0.123617	0.00170512
ILMN_1657096	B3GALT3	6.64098	6.63021	6.60624	6.55487	6.56569	6.59074	6.54371	6.53777	6.6256	6.59111	6.56036	6.55231	0.057884	0.0208968	0.00250843	0.882228	0.0010979	0.973191
ILMN_1657111	C14orf78	11.3966	11.5319	11.2848	11.3598	11.2676	11.3557	11.2823	11.0083	11.2974	11.1997	11.2676	11.3019	0.148003	0.128768	0.071305	0.168764	-0.0604043	0.573276
ILMN_1657125	LOC645073	6.66415	6.66829	6.61239	6.70561	6.65547	6.81099	6.70883	6.69834	6.73985	6.7385	6.66652	6.71639	-0.0588581	0.10224	0.0168871	0.755019	0.00853718	0.7467
ILMN_1657128	PTPRU	6.65428	6.50373	6.565	6.59534	6.63615	6.63095	6.49082	6.61386	6.58047	6.57443	6.63021	6.62231	-0.0346456	0.502405	0.0118277	0.61369	-0.0472649	0.309677
ILMN_1657129	SKAP2	7.44676	7.53652	7.5843	7.64309	7.49651	7.55083	7.51144	7.53354	7.55229	7.63414	7.72785	7.69155	-0.161989	0.0291644	-0.121036	0.0755408	-0.152087	0.0069023
ILMN_1657139	ADAT1	7.8066	7.7371	7.75574	7.79018	7.71831	7.70861	7.58595	7.64726	7.72824	7.6948	7.66028	7.84107	0.0344295	0.59191	0.00698709	0.914456	-0.0782355	0.320532
ILMN_1657141	FMR1NB	6.54731	6.61399	6.63953	6.64494	6.60722	6.58649	6.60241	6.68602	6.58649	6.57733	6.63627	6.68205	-0.0316039	0.483009	-0.0189971	0.614215	-0.00690981	0.880842
ILMN_1657144	C1orf69	6.61815	6.6538	6.68975	6.71662	6.69707	6.7025	6.62462	6.70342	6.68731	6.73015	6.72368	6.68485	-0.0589962	0.078034	-0.00750147	0.649566	-0.0411145	0.214408
ILMN_1657145	MEOX1	6.64422	6.7332	6.49802	6.67136	6.64314	6.6671	6.57846	6.73315	6.75983	6.64398	6.72232	6.64025	-0.0437003	0.584593	-0.0083171	0.782429	0.0216291	0.74692
ILMN_1657147	LOC390282	6.77996	6.68812	6.60932	6.72062	6.58624	6.75127	6.64326	6.66746	6.61301	6.61018	6.70359	6.68485	0.0262583	0.668801	0.0198328	0.750258	-0.0249663	0.486353
ILMN_1657148	C19orf23	6.9079	6.89567	6.85857	6.94676	6.82757	6.82568	6.93235	6.93697	7.02172	6.90401	6.96073	6.97013	-0.0575766	0.0862624	-0.0782837	0.157337	0.0187235	0.627145
ILMN_1657149	C8orf46	6.60439	6.77417	6.6671	6.70986	6.72913	6.68614	6.57316	6.58223	6.71181	6.61153	6.66652	6.55064	0.0723203	0.293146	0.0988133	0.0504402	0.0128382	0.829634
ILMN_1657153	ACTR3	10.0262	9.80942	9.75245	9.98203	9.97172	10.0496	9.68445	9.94209	9.5022	9.93199	9.89003	9.8973	-0.0437368	0.63168	0.0946866	0.0266687	-0.196858	0.199618
ILMN_1657157	LOC644607	6.6658	6.62584	6.701	6.70411	6.73026	6.67337	6.79616	6.63627	6.61766	6.70135	6.58197	6.59385	0.0384881	0.428559	0.076858	0.136781	0.0576414	0.44559
ILMN_1657158	RNF168	6.78368	6.73162	6.69671	6.629	6.75205	6.75644	6.75439	6.68474	6.68333	6.69996	6.74064	6.81035	-0.0129787	0.767167	-0.0378202	0.513089	-0.0428287	0.343131
ILMN_1657163	LOC641741	6.85043	6.68508	6.7367	6.70722	6.57468	6.67912	6.67066	6.71639	6.7018	6.77784	6.72095	6.63191	0.0471731	0.506461	-0.0565608	0.388791	-0.0139502	0.769847
ILMN_1657191	KRTAP10-5	6.61534	6.66699	6.73026	6.6658	6.71021	6.69625	6.58022	6.53932	6.78608	6.59993	6.55704	6.75573	0.0332951	0.654217	0.0531877	0.437762	-0.00236318	0.981793
ILMN_1657194	TSNAXIP1	6.68917	6.67806	6.7133	6.63191	6.69591	6.6763	6.69532	6.66888	6.69625	6.63651	6.62127	6.69405	0.0429015	0.154556	0.0174297	0.582025	0.0362081	0.20447
ILMN_1657199	NFASC	6.70192	6.67923	6.65535	6.68626	6.78803	6.64902	6.60241	6.72311	6.86512	6.71788	6.66225	6.60179	0.0181961	0.64088	0.0471315	0.427166	0.0695741	0.449027
ILMN_1657204	SAE1	12.3769	12.4578	12.3845	12.3769	12.3783	12.3291	12.1436	11.9713	12.2976	12.1798	12.0974	12.1247	0.272436	0.00153251	0.227457	0.00145405	0.00354212	0.972712
ILMN_1657210	LOC645167	6.60735	6.56201	6.63155	6.59671	6.61399	6.5541	6.68345	6.65261	6.62096	6.58348	6.67842	6.57013	-0.0103714	0.806881	-0.0224108	0.59131	0.0416652	0.340787
ILMN_1657222	LOC648972	6.69775	6.63337	6.6852	6.68626	6.67923	6.67337	6.60241	6.6206	6.80606	6.78171	6.77789	6.65093	-0.0647373	0.242722	-0.0572269	0.255253	-0.0604915	0.481178
ILMN_1657230	MYRIP	6.64098	6.63772	6.63572	6.65511	6.58047	6.62011	6.66598	6.72152	6.64169	6.60142	6.93534	6.58561	-0.0693151	0.576147	-0.0888929	0.486407	-0.0310578	0.802892
ILMN_1657234	CCL20	6.65117	6.63482	6.60191	6.6465	6.60142	6.71033	6.59919	6.64746	6.58649	6.75026	6.58624	6.63675	-0.02845	0.604076	-0.00500241	0.935283	-0.046705	0.419337
ILMN_1657235	LOC342979	6.72346	6.68345	6.67524	6.72698	6.64842	6.61852	6.67066	6.80295	6.7242	6.76238	6.73377	6.93539	-0.116464	0.146326	-0.145873	0.108418	-0.0779143	0.350495
ILMN_1657237	NUBP2	7.06813	7.09926	7.10467	6.97032	7.11101	6.92606	7.06405	7.11828	7.16334	6.9729	7.15339	7.10257	0.0143985	0.80617	-0.0738176	0.394436	0.0389397	0.557475
ILMN_1657238	LOC643274	6.67383	6.68345	6.63421	6.63772	6.5379	6.65345	6.57846	6.58536	6.64902	6.56557	6.5509	6.67701	0.0660069	0.195969	0.0118633	0.836276	0.00645413	0.89455
ILMN_1657247	TBC1D3B	6.6613	6.59558	6.69544	6.63627	6.65273	6.67159	6.55666	6.57064	6.56278	6.63796	6.59373	6.62536	0.0317608	0.378743	0.0345146	0.106888	-0.0556569	0.0155667
ILMN_1657248	EREG	6.7367	6.77789	6.6483	6.70146	6.72015	6.70757	6.78597	6.68847	6.55653	6.71227	6.70359	6.7516	-0.00152269	0.972143	-0.0127602	0.463637	-0.0454976	0.540659
ILMN_1657249	LOC647008	6.6029	6.49742	6.53064	6.4813	6.62608	6.60389	6.629	6.54962	6.56278	6.55296	6.61705	6.56494	-0.0346627	0.399946	-0.00788975	0.880203	0.00214735	0.948877
ILMN_1657254	SGCD	6.63675	6.60796	6.59273	6.62011	6.54525	6.60685	6.68649	6.60463	6.60142	6.56049	6.58047	6.63349	0.0209997	0.453506	-0.000741817	0.982464	0.0393644	0.327809
ILMN_1657266	LOC649350	6.71731	6.66699	6.5366	6.63033	6.6029	6.70757	6.51613	6.67277	6.66829	6.52372	6.67524	6.59857	0.0411209	0.585245	0.0477568	0.424921	0.0198862	0.783122
ILMN_1657273	LOC651429	6.80165	6.68672	6.77811	6.68766	6.59061	6.71033	6.72346	6.59993	6.71181	6.81334	6.72232	6.75573	-0.0083027	0.859496	-0.100932	0.0899446	-0.0853955	0.146692
ILMN_1657274	LOC729744	6.541	6.57316	6.60191	6.57165	6.56303	6.46262	6.55155	6.59323	6.55819	6.56049	6.52998	6.62084	0.00158742	0.962782	-0.0380034	0.436616	-0.00278253	0.929777
ILMN_1657278	DVL1	6.91875	6.83758	6.98687	6.89562	6.9962	6.92493	6.85748	6.81003	6.96683	6.99856	6.85924	6.89693	-0.00384502	0.951931	0.0206735	0.707114	-0.0401299	0.554814
ILMN_1657279	LOC653706	6.64098	6.60956	6.63572	6.64794	6.61399	6.59993	6.76293	6.64314	6.64758	6.59857	6.5541	6.62536	0.0360814	0.190837	0.0279467	0.329563	0.0918771	0.107185
ILMN_1657283	ALKBH5	11.6867	11.7295	11.5985	11.7467	11.6812	11.756	11.5735	11.3508	11.4993	11.5179	11.4763	11.4986	0.173989	0.0125771	0.230373	0.000953852	-0.0230725	0.746394
ILMN_1657285	LOC441762	6.57222	6.61558	6.60042	6.60587	6.6569	6.54962	6.57846	6.67136	6.61301	6.69451	6.65797	6.65833	-0.0741961	0.0134204	-0.0661439	0.117701	-0.049333	0.171996
ILMN_1657286	LOC728734	6.75071	6.68345	6.71193	6.64206	6.64458	6.60129	6.72056	6.75104	6.71639	6.66189	6.72823	6.68205	0.02464	0.423453	-0.0614106	0.0636453	0.038609	0.160856
ILMN_1657288	GUSBL2	6.98326	7.03941	6.98212	6.90721	6.87875	6.88941	7.01626	6.92073	6.90561	6.86908	6.97676	6.8927	0.0887519	0.0784405	-0.021055	0.566139	0.0346867	0.506725
ILMN_1657295	CPA6	6.69903	6.6538	6.60772	6.55487	6.66616	6.62011	6.53608	6.55998	6.59695	6.53621	6.59223	6.64794	0.0613871	0.214563	0.0215859	0.660867	-0.0277922	0.492083
ILMN_1657302	SULT1A1	6.59341	6.52091	6.64386	6.57443	6.63615	6.57468	6.63482	6.52725	6.60858	6.56404	6.46603	6.45777	0.0901159	0.142047	0.0991394	0.0675593	0.0942694	0.115635
ILMN_1657312	CBWD2	6.56734	6.61399	6.62718	6.63929	6.55116	6.56595	6.60241	6.5643	6.51297	6.67483	6.60389	6.72777	-0.0659942	0.176136	-0.0833653	0.137969	-0.108937	0.0696057
ILMN_1657316	IGSF1	6.58611	6.69509	6.65535	6.60587	6.69591	6.54795	6.52529	6.67277	6.53466	6.53167	6.64938	6.63675	0.0395842	0.464913	0.01064	0.860924	-0.0283628	0.663819
ILMN_1657317	POLR2J	7.50586	7.40598	7.47675	7.42486	7.46314	7.52265	7.63408	7.57849	7.74426	7.61712	7.44345	7.64867	-0.106877	0.203372	-0.0995245	0.227367	0.0825333	0.361975
ILMN_1657332	CCDC85B	7.29109	7.27693	7.28124	7.10344	7.1156	7.1824	7.39715	7.2886	7.23088	7.30842	7.3852	7.36885	-0.0710699	0.0401174	-0.220344	0.00288338	-0.0486104	0.419259
ILMN_1657340	ZNF607	6.72754	6.74232	6.76756	6.77909	6.73783	6.67337	6.71159	6.70883	6.6973	6.71788	6.73648	6.78716	-0.00136356	0.957011	-0.0170767	0.66907	-0.0412669	0.122943
ILMN_1657344	PLAG1	6.67383	6.71033	6.65249	6.80874	6.69949	6.6763	6.63615	6.70883	6.75516	6.6206	6.60389	6.73512	0.025677	0.595371	0.0749723	0.266016	0.0468423	0.43352
ILMN_1657347	PODXL2	7.12818	7.21281	7.15187	7.09238	7.16789	7.1247	7.10388	7.24378	7.14131	6.99714	7.03227	7.0039	0.153182	0.00502827	0.117216	0.00859675	0.151887	0.024504
ILMN_1657348	LOC650909	6.68345	6.75472	6.7189	6.84777	6.77931	6.7421	6.63892	6.69834	6.75684	6.7341	6.76999	6.7394	-0.0288091	0.286009	0.0418954	0.271919	-0.0498011	0.236901
ILMN_1657349	EPHA6	6.63965	6.65976	6.6852	6.64206	6.64602	6.61852	6.65093	6.57663	6.54255	6.59558	6.57153	6.65547	0.0540101	0.128207	0.0280078	0.348406	-0.017489	0.688694
ILMN_1657358	CD200R1L	6.63675	6.59857	6.67524	6.59968	6.68578	6.62255	6.62035	6.76078	6.62389	6.59248	6.71799	6.7133	-0.0377364	0.46403	-0.0385857	0.470661	-0.00624912	0.924374
ILMN_1657361	CBX7	7.37275	7.40724	7.45628	7.24833	7.29829	7.32201	7.38713	7.50887	7.4307	7.29855	7.40074	7.43946	0.0325062	0.539545	-0.0900441	0.129737	0.062647	0.318955
ILMN_1657373	LEPREL1	7.72021	7.84357	7.85076	7.82768	7.73577	7.68847	7.669	7.7377	7.77109	7.62384	7.65653	7.70423	0.14331	0.0414498	0.0891056	0.131254	0.0643939	0.165841
ILMN_1657374	DDX12	6.56874	6.61116	6.61815	6.41255	6.63179	6.59385	6.58311	6.58386	6.6256	6.56404	6.61852	6.67853	-0.0210164	0.595504	-0.0743042	0.379585	-0.022847	0.559327
ILMN_1657378	FLJ42842	6.65273	6.56557	6.52477	6.55819	6.58047	6.63216	6.58473	6.65809	6.68731	6.55296	6.56659	6.68969	-0.0220538	0.721176	-0.0128058	0.805544	0.0403009	0.490297
ILMN_1657381	RASSF6	6.61386	6.52725	6.57733	6.62316	6.53505	6.5541	6.62608	6.5541	6.58047	6.5079	6.57449	6.54074	0.0317692	0.371885	0.0297252	0.418056	0.0458401	0.182902
ILMN_1657395	HMGCR	8.35036	8.28307	8.39902	8.50104	8.5789	8.3516	8.18803	8.18012	8.26331	8.41795	8.44268	8.45756	-0.0952465	0.0552505	0.037781	0.606479	-0.228909	0.00137827
ILMN_1657398	LOC284757	6.67524	6.57468	6.46779	6.63482	6.58624	6.60241	6.62169	6.68064	6.62389	6.62742	6.58924	6.61411	-0.037685	0.569741	-0.00243554	0.899704	0.0318197	0.226824
ILMN_1657399	RFX6	6.62828	6.60463	6.68975	6.57291	6.56303	6.62133	6.60241	6.60327	6.61448	6.64266	6.66947	6.66177	-0.0170832	0.555537	-0.0722109	0.0214655	-0.0512488	0.00445469
ILMN_1657405	SPPL3	6.9042	6.87768	6.91458	6.94468	6.90701	6.91378	6.93529	6.81003	6.84668	6.85975	6.91199	6.86717	0.0191822	0.384711	0.0421829	0.102793	-0.0156386	0.719744
ILMN_1657406	NUP50	6.60735	6.65237	6.59757	6.73252	6.55538	6.6763	6.67759	6.69126	6.64025	6.71078	6.63482	6.56163	-0.0166459	0.737083	0.0189915	0.793024	0.0339565	0.498517
ILMN_1657409	SERHL	6.57393	6.64938	6.59422	6.68205	6.57884	6.58511	6.56582	6.62499	6.61153	6.52842	6.67842	6.65237	-0.0138922	0.800592	-0.00440204	0.942223	-0.0189531	0.721897
ILMN_1657421	LOC440917	6.75071	6.76349	6.7394	6.70411	6.64458	6.7421	6.71456	6.81142	6.61301	6.6538	6.72981	6.71947	0.0501724	0.113067	-0.00409685	0.917252	0.0119676	0.856412
ILMN_1657423	SPG21	7.83708	7.96341	8.0378	8.02058	7.96278	7.96295	8.02976	7.97319	8.24888	8.12171	8.1603	8.12223	-0.18865	0.0346436	-0.152643	0.00271579	-0.050808	0.582354
ILMN_1657429	SMAGP	6.55538	6.61962	6.633	6.57013	6.62231	6.63216	6.63892	6.68474	6.62231	6.67054	6.55845	6.55845	0.00685906	0.88467	0.0123897	0.78282	0.0528466	0.27446
ILMN_1657435	MT1M	6.69068	6.7063	6.51613	6.51455	6.54821	6.52855	6.60993	6.67524	6.6071	6.5331	6.671	6.53925	0.0565853	0.496591	-0.0506823	0.332622	0.049639	0.37859
ILMN_1657436	FGFR1OP2	7.59078	7.61183	7.45062	7.66724	7.68355	7.70447	7.48007	7.46314	7.29879	7.51388	7.50615	7.46619	0.0556715	0.350443	0.189684	0.000487816	-0.0814067	0.244202
ILMN_1657440	KCNC2	6.57222	6.61693	6.61091	6.61264	6.60993	6.60537	6.61141	6.55704	6.59086	6.6632	6.63627	6.59708	-0.0321587	0.247408	-0.022867	0.301965	-0.0457453	0.13998
ILMN_1657442	ADARB1	6.62377	6.64639	6.56659	6.61399	6.59061	6.59074	6.65976	6.68602	6.61301	6.56557	6.6594	6.57908	0.0108969	0.786927	-0.00290638	0.928196	0.0515776	0.227798
ILMN_1657443	LOC730347	6.68917	6.5821	6.60042	6.60117	6.67923	6.58811	6.65535	6.67277	6.5714	6.62341	6.5541	6.59223	0.0339861	0.428994	0.0329258	0.397629	0.0432609	0.309071
ILMN_1657446	C1orf57	8.67437	8.83591	8.94146	8.68361	8.73517	8.68482	8.87154	8.83893	9.10835	8.99214	8.74136	8.76329	-0.0150132	0.899512	-0.131065	0.185067	0.107342	0.410003
ILMN_1657451	SRPK2	6.87702	6.77789	6.81217	6.81382	6.71776	6.8175	6.77603	6.83106	6.72095	6.7895	6.79356	6.72095	0.0543561	0.219915	0.0150257	0.727936	0.0080109	0.849421
ILMN_1657455	CEACAM4	6.73388	6.73962	6.78352	6.6901	6.72243	6.77904	6.629	6.70342	6.61301	6.68695	6.7459	6.62084	0.0677742	0.160332	0.045957	0.360082	-0.0360916	0.47309
ILMN_1657470	YTHDF3	7.88148	7.81282	7.85429	7.92456	8.06966	7.91406	7.58405	7.64538	7.54231	7.84626	7.76578	7.74237	0.06473	0.157345	0.184625	0.0356654	-0.194224	0.0110532
ILMN_1657472	POLR2J4	6.76591	6.71913	6.66273	6.68076	6.63179	6.68064	6.64494	6.66106	6.71181	6.68695	6.71159	6.61411	0.0450415	0.341755	-0.00648713	0.855882	0.00172391	0.963626
ILMN_1657475	GALT	7.48195	7.66206	7.65844	7.77542	7.61898	7.67494	7.90723	7.5714	7.8011	7.8011	7.81825	7.78852	-0.201807	0.0283103	-0.112842	0.0725157	-0.0427134	0.689785
ILMN_1657476	LOC340228	6.6671	6.64639	6.6538	6.51455	6.64055	6.55691	6.62035	6.69265	6.62864	6.65093	6.55845	6.63191	0.0419994	0.219059	-0.0430909	0.406855	0.0334509	0.408826
ILMN_1657478	MAGEL2	6.81548	6.79746	7.00902	6.79237	6.81548	6.93789	6.90945	6.81708	6.93166	6.82101	6.86037	6.81174	0.0429455	0.569224	0.0175394	0.73092	0.0550228	0.22239
ILMN_1657483	SEC23B	8.75876	8.63151	8.62697	8.65887	8.56695	8.67905	8.5368	8.47102	8.50224	8.48013	8.46767	8.51161	0.185942	0.0146112	0.148488	0.0158016	0.0168837	0.504715
ILMN_1657486	OR2AG2	6.66994	6.7367	6.6569	6.6273	6.55256	6.64902	6.71913	6.80761	6.6973	6.60883	6.65666	6.50664	0.0971353	0.127766	0.0189157	0.739289	0.150637	0.0536698
ILMN_1657495	MLEC	9.04193	8.87847	9.01823	8.92139	8.9841	9.01823	9.03422	9.09136	9.15778	8.97362	9.10916	9.01098	-0.0517083	0.471318	-0.0566775	0.314991	0.0632021	0.306257
ILMN_1657497	KIAA0319	6.68917	6.68064	6.69114	6.70561	6.7459	6.74355	6.67912	6.72311	6.69625	6.66071	6.5982	6.6756	0.0421518	0.152941	0.0868562	0.0326283	0.0546608	0.112411
ILMN_1657505	HR	6.82461	6.81521	6.79627	6.75338	6.71913	6.77482	6.80036	6.7487	6.73844	6.83106	6.83359	6.76116	0.00342516	0.898263	-0.0594911	0.107271	-0.0461027	0.205188
ILMN_1657509	TSEN54	7.20779	7.32223	7.39519	7.31841	7.34902	7.25627	7.27599	7.34743	7.41133	7.18801	7.22061	7.28163	0.0783213	0.268827	0.0778177	0.114671	0.114833	0.0739982
ILMN_1657515	RPS6KA5	7.15019	7.23955	7.00006	7.20689	7.12109	7.10362	7.10484	7.15482	7.00506	7.15883	7.08249	7.02943	0.0396853	0.643149	0.0536147	0.3378	-0.00201114	0.973939
ILMN_1657527	CLEC12B	6.61386	6.53699	6.6671	6.63627	6.57745	6.60993	6.55155	6.59993	6.71776	6.55896	6.62437	6.60179	0.0109461	0.808839	0.0128446	0.642704	0.0280398	0.624479
ILMN_1657529	CYP2B6	6.72346	6.57013	6.65535	6.61852	6.5541	6.70503	6.63191	6.68064	6.60439	6.56557	6.69938	6.64169	0.0141004	0.822553	-0.00966106	0.876682	0.00343341	0.94247
ILMN_1657547	CCDC34	9.12679	9.26517	8.93381	9.34237	9.21316	9.26462	9.28255	9.03533	8.87877	9.40532	9.26653	9.21646	-0.187514	0.167793	-0.0227223	0.754473	-0.230554	0.151798
ILMN_1657550	MVD	7.2186	7.21852	7.4114	7.3	7.14901	7.42983	7.36334	7.27445	7.58061	7.28634	7.38681	7.46888	-0.097836	0.304706	-0.0877328	0.41601	0.0254519	0.820631
ILMN_1657554	TSPYL2	6.8402	6.90401	6.95302	6.93539	6.98056	6.78977	6.94691	6.91477	6.86512	6.90241	6.90661	6.86254	0.00855923	0.821582	0.0113932	0.856891	0.0184176	0.541462
ILMN_1657571	ASNA1	6.8402	6.96381	6.84188	6.78749	6.84188	6.72323	6.95186	6.90541	6.92636	6.77373	6.99691	6.79616	0.0263614	0.763694	-0.0714005	0.416153	0.0722752	0.373528
ILMN_1657572	HSFX1	6.59509	6.74647	6.66273	6.66734	6.64842	6.6658	6.68345	6.66474	6.83925	6.7477	6.59373	6.73805	-0.0250611	0.724651	-0.0326371	0.550767	0.0359899	0.653978
ILMN_1657589	LOC644650	6.6613	6.63337	6.66415	6.60439	6.67413	6.72209	6.62608	6.5784	6.70607	6.78673	6.5181	6.73219	-0.0260651	0.768023	-0.0121373	0.897905	-0.0421555	0.664039
ILMN_1657591	SCN3A	6.54731	6.60463	6.53064	6.55321	6.5615	6.54061	6.57316	6.5643	6.55512	6.66604	6.57449	6.59385	-0.0506004	0.229893	-0.0596849	0.104432	-0.0472641	0.170685
ILMN_1657592	ACSM2B	6.57051	6.72902	6.73026	6.71925	6.59472	6.68858	6.68345	6.78923	6.61766	6.61478	6.671	6.62706	0.0389829	0.522723	0.0299013	0.507834	0.0591658	0.325252
ILMN_1657595	LOC651326	6.61214	6.57468	6.62864	6.63033	6.59061	6.56861	6.61288	6.61509	6.55819	6.65523	6.71799	6.58561	-0.0477904	0.31295	-0.0564261	0.252953	-0.0575563	0.247306
ILMN_1657600	NCAPH	6.6382	6.58949	6.59906	6.58335	6.66379	6.68064	6.69114	6.64998	6.58348	6.65809	6.64783	6.68041	-0.0531925	0.0399733	-0.0195142	0.569382	-0.0205747	0.564581
ILMN_1657603	FLJ32310	6.62096	6.65093	6.65535	6.61116	6.62096	6.54962	6.52229	6.62791	6.66391	6.57733	6.60117	6.48614	0.0875386	0.0754383	0.0390368	0.400755	0.049825	0.416901
ILMN_1657606	ZFHX4	7.23944	7.31421	7.15903	7.37548	7.15023	7.30714	7.05306	7.18174	7.05817	7.23296	7.23507	7.18492	0.0199093	0.697867	0.0599669	0.431747	-0.119991	0.0564998
ILMN_1657607	NRG1	6.72221	6.54981	6.58348	6.60117	6.66616	6.60845	6.6495	6.65809	6.59385	6.55743	6.65082	6.6538	-0.00218089	0.973418	0.00457903	0.909261	0.0131309	0.743906
ILMN_1657611	SH3RF3	6.61214	6.60179	6.75205	6.58649	6.53167	6.69242	6.64193	6.66888	6.52842	6.58498	6.59968	6.56011	0.0737362	0.212883	0.0219367	0.674947	0.0314881	0.518787
ILMN_1657612	LOC285900	12.1559	12.085	12.0387	12.2079	12.3108	12.1849	12.0923	12.3441	11.9374	12.2198	12.3514	12.431	-0.240879	0.0267508	-0.0995402	0.243059	-0.209479	0.191908
ILMN_1657618	WTAP	6.65428	6.59993	6.63155	6.68485	6.6087	6.80295	6.67759	6.70215	6.65964	6.65678	6.71033	6.63675	-0.0393674	0.218988	0.0308806	0.637308	0.011841	0.66268
ILMN_1657619	DNAJB14	7.07712	6.8338	6.9475	7.01297	7.09655	7.02125	6.86666	6.83601	6.74959	6.91627	6.93196	6.90415	0.0353446	0.643604	0.126129	0.0104924	-0.10004	0.0497244
ILMN_1657624	NSFL1C	8.46306	8.4524	8.58065	8.31116	8.24586	8.3679	8.37758	8.15679	8.51044	8.28774	8.21467	8.13161	0.287364	0.00923956	0.0969661	0.165548	0.136934	0.290676
ILMN_1657627	CBFA2T3	6.65988	6.62584	6.61386	6.74232	6.56722	6.71788	6.60562	6.58874	6.6388	6.6453	6.59509	6.66947	-0.00343077	0.900941	0.0391824	0.54275	-0.0255717	0.387317
ILMN_1657631	STAP2	6.69498	6.64639	6.65535	6.61399	6.74725	6.69753	6.81548	6.70469	6.63458	6.59403	6.53971	6.68205	0.0603106	0.243036	0.0809927	0.227344	0.112985	0.167154
ILMN_1657632	ZMYM6	8.84406	8.70241	8.80012	8.82589	8.74012	8.73813	8.97598	8.8406	8.88545	8.90557	8.8197	8.93675	-0.10514	0.126263	-0.119293	0.0583517	0.0133366	0.813765
ILMN_1657634	FANCD2	6.7367	6.7647	6.73805	6.85001	6.72913	6.79951	6.59919	6.66622	6.73388	6.71078	6.671	6.688	0.0565567	0.018308	0.102957	0.0492947	-0.0234973	0.593368
ILMN_1657639	EDEM3	6.62377	6.58348	6.54615	6.66023	6.70745	6.59385	6.54371	6.59993	6.59236	6.60142	6.65213	6.56494	-0.0216954	0.555745	0.0476796	0.314942	-0.0274966	0.422633
ILMN_1657643	KCNIP2	6.61386	6.65535	6.66947	6.6029	6.62742	6.61141	6.62608	6.65535	6.63735	6.67054	6.67689	6.69114	-0.0332937	0.134207	-0.0656135	0.0022356	-0.0399273	0.0189244
ILMN_1657652	LOC647683	6.5982	6.64206	6.67923	6.60587	6.64602	6.62828	6.50241	6.70088	6.541	6.58961	6.62127	6.57606	0.0441821	0.17684	0.0310746	0.154541	-0.0142192	0.830429
ILMN_1657656	LOC651141	6.52477	6.61116	6.65117	6.54255	6.61399	6.54641	6.57846	6.60593	6.56709	6.61301	6.58197	6.70146	-0.0364434	0.51972	-0.0644993	0.205043	-0.0483214	0.268175
ILMN_1657662	EXOD1	6.64566	6.76049	6.63155	6.62596	6.60439	6.72686	6.55972	6.59198	6.68462	6.58348	6.70895	6.7149	0.0101261	0.872466	-0.016706	0.784414	-0.0570028	0.373109
ILMN_1657665	ZNF644	6.58611	6.59857	6.68835	6.63929	6.67665	6.69114	6.6495	6.59198	6.74556	6.61301	6.66522	6.80004	-0.0684134	0.347698	-0.0237258	0.7026	-0.0304086	0.692493
ILMN_1657673	LOC90120	7.54115	7.48384	7.55242	7.41506	7.41715	7.54208	7.49711	7.49295	7.73448	7.5378	7.55408	7.68652	-0.067	0.264413	-0.134704	0.0996772	-0.0179543	0.85584
ILMN_1657679	VAV3	6.68777	6.56861	6.64386	6.61264	6.66746	6.62828	6.67066	6.75104	6.64758	6.68193	6.68835	6.68969	-0.0532429	0.201542	-0.0505308	0.0374362	0.0031055	0.926089
ILMN_1657680	CCDC69	6.73388	6.73026	6.66852	6.72198	6.73535	6.7133	6.68205	6.66249	6.76899	6.77021	6.72981	6.73805	-0.0351361	0.225307	-0.0224825	0.180914	-0.0415139	0.300939
ILMN_1657682	GFM1	8.84666	8.79018	8.78891	8.93452	9.00068	8.89083	8.49817	8.65976	8.35204	8.54067	8.41013	8.59832	0.292213	0.0076687	0.425639	0.00268123	-0.0130461	0.906992
ILMN_1657683	C1orf198	7.2141	7.22158	7.20916	7.19096	7.17968	7.12577	7.26225	7.16154	7.25411	7.21313	7.06151	7.08616	0.0946813	0.114852	0.0452046	0.426337	0.105704	0.137326
ILMN_1657686	PDE8A	6.6382	6.7332	6.6671	6.7647	6.63337	6.68858	6.69405	6.71124	6.66664	6.70951	6.62875	6.64482	0.0184721	0.647374	0.0345196	0.489152	0.0296104	0.348236
ILMN_1657697	SAR1A	9.25389	9.16662	9.21229	9.32895	9.24656	9.15417	9.18252	9.27374	9.07658	9.1392	9.12858	9.17481	0.0634039	0.0926449	0.0956922	0.141751	0.0300823	0.635071
ILMN_1657701	TMEM137	8.58926	8.61504	8.88719	8.0625	8.0378	8.27066	8.61075	8.44437	8.66176	8.28774	8.42034	8.39507	0.329444	0.0335458	-0.244062	0.0443257	0.204576	0.0569893
ILMN_1657708	MGLL	6.88068	6.79875	6.99837	6.80627	6.82525	6.83622	6.8142	6.92212	6.85407	6.85975	6.78597	6.96592	0.0220523	0.791416	-0.0479682	0.416263	-0.00708785	0.913092
ILMN_1657709	TRIM34	6.52803	6.48022	6.40065	6.51455	6.51113	6.64061	6.58761	6.48922	6.57582	6.56849	6.54923	6.54074	-0.0831844	0.0940741	0.00261372	0.95485	-0.00193596	0.954782
ILMN_1657711	LOC645868	6.54409	6.61962	6.58511	6.61852	6.58624	6.57606	6.59621	6.64746	6.52842	6.59993	6.58924	6.56494	-0.00175993	0.945426	0.0089062	0.617222	0.00599446	0.875819
ILMN_1657715	LOC642228	6.63518	6.74097	6.65535	6.62145	6.58473	6.64771	6.51613	6.65678	6.73844	6.54834	6.56163	6.66474	0.0855984	0.155831	0.0263936	0.555428	0.0455475	0.574585
ILMN_1657722	RPS3A	13.0075	13.174	13.0806	13.2535	13.2579	13.1713	13.1854	13.1099	13.0538	13.0918	13.1991	13.0951	-0.0412693	0.527341	0.0989147	0.0933479	-0.012282	0.824602
ILMN_1657728	LOC643831	6.67947	6.67242	6.61681	6.80745	6.70238	6.69625	6.73535	6.75939	6.78095	6.83632	6.75394	6.84062	-0.154061	0.0110795	-0.0749319	0.177182	-0.0517329	0.17185
ILMN_1657729	ZNF254	6.75338	6.76049	6.80413	6.87425	6.94077	6.91736	6.80778	6.83601	6.70883	6.85344	6.77789	6.79475	-0.0360261	0.265542	0.1021	0.0273732	-0.0244897	0.614025
ILMN_1657744	C15orf17	7.56678	7.56932	7.47196	7.61404	7.60927	7.73973	7.5477	7.59905	7.70016	7.68774	7.82572	7.78573	-0.23038	0.011437	-0.112051	0.131327	-0.150762	0.0679684
ILMN_1657746	BPHL	8.56733	8.43587	8.75142	8.33189	8.50972	8.60304	8.57115	8.7015	8.66058	8.75274	8.68465	8.78253	-0.1551	0.181431	-0.258425	0.037913	-0.0955625	0.118287
ILMN_1657749	CYP27C1	7.26584	7.23829	7.10858	7.15709	7.26661	7.28806	7.34795	7.2248	7.08085	7.38066	7.61492	7.28082	-0.221229	0.115236	-0.188208	0.153399	-0.207598	0.17355
ILMN_1657750	CNNM1	6.91875	6.9012	6.92231	6.99234	6.96808	6.93662	6.89662	6.91855	6.90561	6.81548	6.74064	6.86954	0.105534	0.0497236	0.157129	0.0181424	0.0983764	0.0603617
ILMN_1657754	RPAP2	7.05085	7.00754	6.93324	7.03557	7.05357	6.98828	6.96678	6.98221	6.78095	6.84877	6.91865	7.00226	0.0739832	0.257729	0.102582	0.101665	-0.0132433	0.874102
ILMN_1657760	SYT17	6.62377	6.64494	6.70757	6.58486	6.67923	6.66308	6.71159	6.6376	6.64902	6.62194	6.65797	6.55538	0.0469962	0.296628	0.0306233	0.504983	0.0543032	0.224589
ILMN_1657766	TRIM29	6.66415	6.65678	6.61239	6.57013	6.48768	6.5344	6.57657	6.54074	6.56557	6.69591	6.60969	6.55064	0.0256961	0.599862	-0.0880089	0.143556	-0.0577861	0.254664
ILMN_1657769	EIF5	6.65117	6.61693	6.71616	6.62145	6.71776	6.65034	6.60697	6.72562	6.64458	6.69869	6.61558	6.60636	0.0212103	0.634916	0.0229716	0.604677	0.0188459	0.701129
ILMN_1657771	CRTC2	7.73583	7.66689	7.95083	7.75185	7.7792	7.6737	7.73702	7.86405	7.81198	7.67289	7.46814	7.88428	0.109412	0.499289	0.0598154	0.655305	0.129246	0.361836
ILMN_1657790	SFRS11	8.81048	8.87741	8.70805	8.8823	8.92897	8.83442	8.8508	8.80993	8.68705	8.73924	9.04902	8.91247	-0.101599	0.376728	-0.0183511	0.854271	-0.117653	0.313998
ILMN_1657796	STMN1	9.46416	9.57685	9.768	9.66179	9.61431	9.54999	9.54999	9.61638	9.49317	9.65405	9.46872	9.52513	0.0537022	0.633688	0.0593954	0.403888	0.00388172	0.955509
ILMN_1657797	FIBP	9.83927	9.77259	9.70986	9.82276	9.74782	9.76713	9.92972	9.97401	10.0126	9.88675	9.90618	9.92454	-0.131916	0.0275494	-0.126586	0.00713697	0.0662906	0.0654129
ILMN_1657803	CFH	6.83758	6.89214	6.80413	6.81515	6.87773	6.83622	6.8471	6.75684	6.81708	6.6901	6.84965	6.8158	0.0594371	0.339838	0.0578519	0.327443	0.0218222	0.713347
ILMN_1657810	PPM1M	8.30729	8.27405	8.19957	8.22117	8.19077	8.02431	8.32669	8.1898	8.37668	8.32902	8.31805	8.28399	-0.0500555	0.22167	-0.164937	0.0580709	-0.0126303	0.836841
ILMN_1657812	LOC644951	6.67383	6.53518	6.62864	6.59534	6.60439	6.57013	6.68205	6.66106	6.63021	6.67054	6.60389	6.62084	-0.0192079	0.69437	-0.0418047	0.13634	0.0260166	0.357314
ILMN_1657816	LOC646422	6.70469	6.6538	6.58986	6.67842	6.71021	6.67159	6.69532	6.70342	6.70469	6.69149	6.5982	6.63675	0.00730225	0.872957	0.0445919	0.206006	0.0589945	0.0961434
ILMN_1657818	IQCB1	6.61386	6.75071	6.75972	6.76944	6.67923	6.69892	6.74097	6.62377	6.6988	6.796	6.6594	6.688	-0.00636883	0.924225	0.00139855	0.97894	-0.0266154	0.647306
ILMN_1657823	PMEPA1	6.72471	6.62875	6.63953	6.65369	6.65117	6.63216	6.69834	6.56741	6.73535	6.58961	6.56163	6.68205	0.0532345	0.32405	0.0345755	0.403103	0.0559341	0.422093
ILMN_1657827	LOC649747	6.68205	6.78575	6.75071	6.70561	6.61129	6.67759	6.75711	6.64998	6.62096	6.70434	6.69787	6.68969	0.0421989	0.241885	-0.0324723	0.314942	-0.0212835	0.636018
ILMN_1657832	LOC222699	6.70053	6.71341	6.8243	6.63929	6.72346	6.74859	6.77449	6.89456	6.71353	6.76238	6.76094	6.7746	-0.0198929	0.641193	-0.0621957	0.135479	0.0282187	0.624873
ILMN_1657836	PLEKHG2	7.42392	7.51602	7.74203	7.50218	7.514	7.41648	7.42128	7.52036	7.41443	7.45017	7.47115	7.36202	0.132878	0.255628	0.0497772	0.334538	0.0242411	0.639039
ILMN_1657837	ZC3H8	7.35089	7.39796	7.24406	7.40178	7.38224	7.42629	7.34864	7.33074	7.27809	7.44331	7.10518	7.33192	0.0374987	0.749047	0.109965	0.334485	0.0256835	0.813093
ILMN_1657838	JMJD5	6.68205	6.72323	6.75972	6.8717	6.72346	6.77384	6.75299	6.75684	6.76735	6.629	6.81798	6.75428	-0.0120884	0.849848	0.0559111	0.472337	0.0253072	0.673014
ILMN_1657847	SUNC1	6.89678	6.93339	6.93	7.04877	6.92469	6.96908	6.88535	7.05022	7.03822	6.99064	7.03347	6.95919	-0.0743784	0.0385052	-0.0135849	0.763649	-0.00316864	0.958528
ILMN_1657854	MITF	6.58035	6.49376	6.55819	6.50532	6.54074	6.5331	6.63892	6.67277	6.58498	6.49109	6.57449	6.60476	-0.0126798	0.78164	-0.0303936	0.44194	0.0754457	0.15072
ILMN_1657855	ACTL6B	6.7367	6.61815	6.74232	6.74579	6.69707	6.73501	6.62608	6.6206	6.69625	6.6538	6.64482	6.72777	0.0235931	0.650573	0.0504915	0.16931	-0.0278186	0.480866
ILMN_1657857	TMEM14C	11.0635	11.0717	11.106	11.1219	11.1951	11.0991	11.1104	11.13	11.4046	11.202	11.188	11.1274	-0.0920323	0.0250084	-0.0337738	0.411834	0.0425151	0.685847
ILMN_1657860	C1orf151	6.84292	6.87057	6.94536	6.93147	6.94914	6.89778	6.95789	6.95967	6.97624	7.13241	6.91865	7.18578	-0.192664	0.091584	-0.152814	0.139393	-0.114348	0.234796
ILMN_1657862	AHCY	11.7803	11.7586	12.0157	11.7849	11.7026	11.6274	11.6301	11.6933	11.9332	11.4841	11.6409	11.6546	0.258374	0.0591541	0.111773	0.191172	0.159006	0.212507
ILMN_1657864	TMUB2	7.75359	7.76241	7.89376	7.78013	7.73917	7.66165	7.95488	7.82722	7.99546	7.86733	7.92442	7.87854	-0.0868427	0.148311	-0.163115	0.0137495	0.0357602	0.541267
ILMN_1657868	SIRT4	6.82334	6.86923	6.78352	6.93324	6.87956	6.81399	6.82757	6.85985	6.88633	6.75684	6.84292	6.88018	-0.0012793	0.978261	0.048952	0.384954	0.0312746	0.480856
ILMN_1657870	ABL2	6.67947	6.73026	6.7255	6.68888	6.67923	6.64206	6.70883	6.62912	6.65189	6.66604	6.61411	6.78106	0.0246761	0.659363	-0.017013	0.757037	-0.0237877	0.686226
ILMN_1657871	RSAD2	6.67253	6.69636	6.69938	6.80874	6.66249	6.77263	6.82112	6.70342	6.76735	6.65809	6.60969	6.61411	0.0621277	0.0243635	0.120656	0.0608108	0.136663	0.0216251
ILMN_1657873	XPO4	8.26446	8.39116	8.42802	8.40267	8.31747	8.42753	8.17477	8.28386	8.04905	8.13594	8.18872	8.14368	0.205103	0.0171097	0.226447	0.00367028	0.0131121	0.860154
ILMN_1657874	LOC643293	6.51862	6.64206	6.62864	6.63627	6.63179	6.60537	6.55666	6.60463	6.63155	6.66189	6.59223	6.61913	-0.0279793	0.559817	5.86766e-05	0.99804	-0.0268056	0.419965
ILMN_1657884	NME2	7.64936	7.5466	7.52201	7.41765	7.34468	7.52174	7.74449	7.69287	7.77109	7.68774	7.63944	7.80846	-0.139226	0.0938591	-0.28386	0.0168262	0.0242676	0.683222
ILMN_1657886	LOC644993	6.62536	6.53044	6.65117	6.6465	6.60005	6.64902	6.51927	6.5811	6.64458	6.58035	6.55244	6.52972	0.0481555	0.289952	0.0776912	0.0229162	0.0274826	0.520119
ILMN_1657888	SALL1	6.6195	6.80295	6.6382	6.60117	6.65273	6.63651	6.64193	6.55256	6.65511	6.55896	6.58486	6.69114	0.07523	0.34872	0.0184838	0.690865	0.00488444	0.929279
ILMN_1657891	TNKS	6.67947	6.65093	6.6256	6.6563	6.71353	6.62011	6.68649	6.59584	6.59236	6.67337	6.64338	6.62536	0.00463463	0.835628	0.015947	0.629652	-0.0224731	0.543008
ILMN_1657892	TLR8	6.64566	6.59993	6.6538	6.66734	6.63615	6.52045	6.62328	6.66379	6.65964	6.77647	6.65511	6.64639	-0.0595246	0.258306	-0.0846753	0.239389	-0.04375	0.375471
ILMN_1657893	TXNRD2	8.76579	8.87877	8.89725	8.70846	8.8022	8.67649	8.84383	8.61537	8.80208	8.64533	8.66657	8.70618	0.174577	0.0175765	0.0563563	0.24816	0.081067	0.325907
ILMN_1657898	MTP18	6.90541	6.89103	7.02373	6.80391	6.92955	6.86058	7.02402	6.96803	7.02346	7.09874	7.00287	7.04795	-0.109796	0.0946477	-0.185173	0.0154258	-0.0446854	0.251241
ILMN_1657913	C1orf84	6.5982	6.59993	6.74097	6.72698	6.70745	6.61705	6.57468	6.69949	6.65666	6.70699	6.62267	6.62536	-0.00530662	0.927519	0.0321559	0.502902	-0.00806062	0.869117
ILMN_1657914	LOC642568	6.64278	6.63627	6.59422	6.45537	6.58047	6.62011	6.57165	6.57405	6.60142	6.63349	6.56849	6.58699	0.0281015	0.317145	-0.0443384	0.452073	-0.0139487	0.552977
ILMN_1657932	MUC6	6.82069	6.80553	6.8193	6.92122	6.81548	6.88363	6.9108	6.82133	6.87374	6.7289	6.81686	6.82472	0.0250119	0.466229	0.0832801	0.128734	0.0784613	0.122776
ILMN_1657946	SEC15L2	6.59048	6.62584	6.72902	6.6465	6.66249	6.68333	6.61141	6.6489	6.66118	6.64398	6.71033	6.71788	-0.0422819	0.425737	-0.0266198	0.360194	-0.0502301	0.145542
ILMN_1657948	LOC649317	6.541	6.64206	6.59757	6.55959	6.54988	6.57291	6.57165	6.52058	6.60587	6.57443	6.56329	6.59857	0.0147824	0.658762	-0.0179658	0.219994	-0.0127282	0.66051
ILMN_1657949	RHEB	10.5454	10.3298	10.2012	10.3833	10.3828	10.4823	10.4488	10.5726	10.448	10.2953	10.5684	10.4496	-0.0789241	0.570286	-0.0216501	0.813009	0.0520386	0.591091
ILMN_1657950	RPS26P10	9.11946	8.9864	9.08697	8.8762	8.89524	9.01711	9.26155	9.15003	9.56659	9.42847	9.26029	9.51276	-0.33623	0.0163047	-0.470993	0.00548995	-0.0744521	0.634558
ILMN_1657955	FMNL3	6.65845	6.68205	6.68975	6.69869	6.73659	6.64061	6.69834	6.69126	6.68602	6.68438	6.64061	6.57153	0.0445735	0.262109	0.05979	0.237713	0.0596983	0.145115
ILMN_1657958	LOC648264	6.59993	6.5821	6.67923	6.43986	6.58047	6.67759	6.55155	6.60895	6.62096	6.65093	6.60697	6.59857	0.00159811	0.964745	-0.0528495	0.497396	-0.0250035	0.404893
ILMN_1657959	LOC643686	6.68508	6.74798	6.69544	6.66427	6.70745	6.70503	6.71159	6.69834	6.66988	6.63796	6.69938	6.65237	0.046264	0.16041	0.0290133	0.279953	0.0300317	0.248486
ILMN_1657962	LOC728946	6.69068	6.67242	6.71467	6.58924	6.71639	6.70025	6.67759	6.73162	6.63735	6.70561	6.71673	6.71639	-0.020319	0.186772	-0.0442864	0.331728	-0.0307222	0.327316
ILMN_1657968	MAP2K2	8.16162	8.58315	8.56343	8.55702	8.16426	8.30294	8.43911	8.78548	8.58168	8.24442	8.23855	8.6566	0.0562097	0.787438	-0.0384497	0.841239	0.222235	0.263646
ILMN_1657972	HHIPL1	6.63518	6.61264	6.69822	6.65892	6.64193	6.68754	6.65093	6.76569	6.64602	6.65093	6.61411	6.54242	0.0461934	0.321638	0.0603111	0.155608	0.0850625	0.166964
ILMN_1657977	MSRB2	7.52201	7.60156	7.45693	7.48114	7.3907	7.53167	7.72043	7.60021	7.79704	7.7224	7.53419	7.62088	-0.09899	0.222552	-0.15799	0.081606	0.0800708	0.368072
ILMN_1657983	TERF2IP	8.8689	8.97712	8.97362	8.75251	8.82432	8.81318	8.92944	8.98919	8.83529	8.73161	8.83055	8.71166	0.181938	0.0235818	0.0387294	0.41868	0.160032	0.0507567
ILMN_1657985	LOC644789	6.53634	6.52875	6.6453	6.45537	6.51717	6.55109	6.69996	6.59036	6.61301	6.66462	6.60697	6.58911	-0.0501057	0.318431	-0.112357	0.0358311	0.0142072	0.743045
ILMN_1657991	LOC391722	6.51665	6.56557	6.67665	6.63033	6.52855	6.55691	6.68205	6.55256	6.49909	6.59558	6.62437	6.59708	-0.0193855	0.708406	-0.0337464	0.34758	-0.0277796	0.640731
ILMN_1657993	ADNP	8.08266	8.22092	8.27168	8.20409	8.29191	8.29419	7.98575	8.10972	8.07928	8.07473	8.10706	8.1131	0.093462	0.180731	0.165103	0.00667373	-0.040044	0.364274
ILMN_1657996	LOC642035	6.65845	6.81888	6.87885	6.70986	6.83695	6.69753	6.69683	6.78923	6.6901	6.75428	6.68672	6.65547	0.0865726	0.295305	0.0492907	0.407041	0.0265633	0.572539
ILMN_1658010	CENPI	7.18504	7.07951	7.26572	7.31238	7.19902	7.17913	7.17695	7.23088	7.06839	7.1855	7.19227	7.18665	-0.0113786	0.843275	0.0420398	0.368882	-0.0293962	0.572047
ILMN_1658015	MBNL2	7.41841	7.51694	7.31373	7.57875	7.32589	7.4882	7.53909	7.36893	7.28097	7.43685	7.43112	7.56253	-0.0604702	0.452135	-0.0125522	0.89038	-0.0805068	0.407416
ILMN_1658016	ZNF831	6.59173	6.59098	6.5366	6.54435	6.66746	6.56456	6.59211	6.55845	6.57582	6.72062	6.50678	6.58561	-0.0312301	0.656236	-0.0122096	0.875542	-0.0288768	0.671392
ILMN_1658017	SPN	6.57557	6.61962	6.70503	6.59385	6.629	6.62255	6.75584	6.67818	6.56849	6.71227	6.65666	6.64639	-0.0383672	0.42429	-0.0566401	0.0706248	-0.0042696	0.944919
ILMN_1658018	LOC441296	6.51665	6.63167	6.55231	6.57443	6.64974	6.51021	6.64193	6.55538	6.60858	6.61301	6.48473	6.49722	0.0352251	0.543601	0.0464732	0.46347	0.0703119	0.216734
ILMN_1658019	LOC648447	6.58874	6.71639	6.67923	6.61558	6.72346	6.55845	6.57657	6.67959	6.61913	6.57594	6.69787	6.61411	0.0321436	0.571948	0.00318653	0.960396	-0.00421076	0.93263
ILMN_1658022	LOC641820	6.7394	6.66118	6.7394	6.60117	6.69451	6.74982	6.72056	6.57405	6.7149	6.59993	6.63917	6.64639	0.0848361	0.0465501	0.0533389	0.30813	0.041343	0.45518
ILMN_1658027	RAD54L	8.37625	8.48972	8.65672	8.61254	8.60405	8.59607	8.56613	8.49697	8.53813	8.54677	8.31982	8.43984	0.0720884	0.528444	0.168743	0.0621481	0.098266	0.225071
ILMN_1658028	LOC732371	6.79746	6.64061	6.79627	6.8158	6.83779	6.86151	6.74825	6.86666	6.73388	6.7637	6.74982	6.90745	-0.0622132	0.439034	0.0313721	0.579473	-0.0240616	0.732523
ILMN_1658033	KIAA0251	6.57884	6.58649	6.65976	6.60117	6.55845	6.6256	6.72221	6.56925	6.57582	6.58197	6.63337	6.56494	0.0149338	0.674239	0.00164382	0.95666	0.028998	0.619732
ILMN_1658034	LOC654000	6.55679	6.61399	6.60932	6.53349	6.53011	6.57606	6.54371	6.69265	6.59236	6.57001	6.65356	6.61913	-0.0208712	0.530081	-0.0676787	0.0757178	-0.00466231	0.930339
ILMN_1658036	LOC645438	6.57884	6.64938	6.63421	6.66427	6.65428	6.73219	6.55308	6.62377	6.66249	6.55155	6.65511	6.68345	-0.00922646	0.849076	0.053541	0.317947	-0.0169218	0.758111
ILMN_1658040	CRABP1	6.68345	6.67383	6.68835	6.68076	6.66249	6.68614	6.69996	6.67665	6.60439	6.52372	6.64338	6.671	0.0691756	0.20226	0.06376	0.235968	0.0476325	0.424234
ILMN_1658044	LOC648814	6.59173	6.56049	6.63155	6.61399	6.59894	6.66994	6.65093	6.61926	6.66249	6.56049	6.53634	6.63506	0.017291	0.657263	0.0503248	0.242554	0.0669276	0.107764
ILMN_1658053	DYNLRB1	9.55904	9.7091	9.85598	9.51481	9.43936	9.39633	10.0192	9.89896	9.98289	9.88096	9.98501	9.92713	-0.222998	0.0701049	-0.480871	0.000468414	0.0359862	0.483306
ILMN_1658058	LOC338750	6.55998	6.59993	6.63009	6.70411	6.67665	6.66852	6.61411	6.54666	6.59236	6.6029	6.69242	6.62084	-0.0420555	0.284502	0.0443741	0.205574	-0.054344	0.183203
ILMN_1658060	LOC401629	6.55998	6.58811	6.43751	6.53207	6.65428	6.53906	6.61877	6.57405	6.53945	6.57733	6.50241	6.54885	-0.0143276	0.7932	0.0322747	0.515014	0.0345626	0.336646
ILMN_1658067	LOC647474	6.75338	6.64783	6.89994	6.60439	6.68333	6.68474	6.71021	6.62645	6.55193	6.69149	6.65797	6.60327	0.116139	0.208306	0.00657354	0.867483	-0.021383	0.704393
ILMN_1658071	ATP1B1	8.80027	8.77361	8.79137	8.86791	8.91357	8.79998	9.01861	9.00152	8.77045	9.04394	8.9927	8.9696	-0.213666	0.000788251	-0.141599	0.0233388	-0.0718925	0.435176
ILMN_1658072	LOC645545	6.67665	6.80703	6.8522	6.63482	6.70238	6.69242	6.67513	6.75684	6.73072	6.67883	6.76856	6.7117	0.0589284	0.372907	-0.0431562	0.268606	0.00119644	0.974801
ILMN_1658074	ZCCHC13	6.57051	6.63627	6.61239	6.64338	6.53011	6.51606	6.63482	6.61509	6.5714	6.59111	6.76597	6.57606	-0.0379891	0.58421	-0.0811961	0.328762	-0.0372777	0.590197
ILMN_1658080	ZNF573	7.89735	8.28466	8.21712	8.25809	8.19293	8.13594	8.04821	8.04741	8.18424	7.97097	8.01529	7.81628	0.198863	0.21145	0.26147	0.0200968	0.159107	0.102934
ILMN_1658081	FRMPD2	6.61043	6.64783	6.64968	6.59074	6.46982	6.51606	6.57026	6.55538	6.57896	6.55155	6.61411	6.52972	0.0708501	0.0667552	-0.0395876	0.412935	0.00307283	0.912323
ILMN_1658083	ABT1	6.9042	7.04669	6.93785	7.02714	6.97165	6.89042	7.00441	7.03063	6.93166	6.88739	7.01196	6.91617	0.0244068	0.691341	0.0245638	0.676726	0.0503933	0.352096
ILMN_1658093	LOC652470	6.95669	6.8645	6.8815	6.91696	6.88485	6.91208	6.85396	6.93618	6.96448	6.89668	7.08599	6.97156	-0.0838455	0.247067	-0.0801094	0.225433	-0.0665336	0.358947
ILMN_1658094	ZNF365	6.78803	6.81248	6.76249	6.8052	6.86264	6.70388	6.78466	6.75684	6.78095	6.7595	6.87425	6.78537	-0.018708	0.645162	-0.0158004	0.798708	-0.0322291	0.419229
ILMN_1658104	KBTBD6	6.91617	6.87057	6.96486	6.91329	6.98236	6.89959	6.86176	6.88835	6.83485	6.83359	6.92478	6.89416	0.0330219	0.436093	0.0475679	0.268713	-0.0225233	0.506801
ILMN_1658108	LOC651128	6.69219	6.63337	6.66852	6.66427	6.60142	6.60993	6.52065	6.61067	6.73241	6.66462	6.60969	6.68041	0.0131214	0.657155	-0.0263666	0.416155	-0.0303289	0.665035
ILMN_1658109	LOC654172	6.66285	6.54654	6.58836	6.6273	6.55538	6.67337	6.58473	6.62231	6.50247	6.5714	6.62437	6.55845	0.0145097	0.732255	0.0339424	0.441982	-0.0149007	0.733011
ILMN_1658110	C18orf19	7.20249	7.14681	7.1602	7.21884	7.42882	7.25537	7.22158	7.25803	7.07543	7.29336	7.40196	7.2705	-0.152108	0.0256767	-0.0209292	0.797737	-0.136929	0.118088
ILMN_1658111	MGC34800	6.61214	6.59857	6.64968	6.64061	6.62499	6.56861	6.62328	6.59708	6.58223	6.70434	6.55244	6.64326	-0.0132171	0.791213	-0.021941	0.67901	-0.0324829	0.516755
ILMN_1658114	HOM-TES-103	6.64422	6.67665	6.6569	6.71536	6.71238	6.65874	6.59621	6.67395	6.73072	6.71502	6.66652	6.6664	-0.0233867	0.280011	0.0128514	0.627665	-0.015687	0.729022
ILMN_1658121	CFP	6.63118	6.7205	6.56963	6.67418	6.60142	6.77756	6.61411	6.62231	6.66118	6.70434	6.66522	6.71639	-0.0548782	0.302792	-0.0109269	0.847823	-0.0627804	0.0414915
ILMN_1658123	DAZ2	6.71462	6.63929	6.67923	6.72846	6.61815	6.69242	6.79162	6.73038	6.7149	6.61478	6.66522	6.6157	0.0458128	0.16989	0.0477756	0.260667	0.113731	0.0167219
ILMN_1658143	RFC3	7.69846	7.65227	7.60052	7.69867	7.84107	7.56549	7.42441	7.59169	7.56688	7.63626	7.68856	7.5743	0.0173766	0.70986	0.0687021	0.469825	-0.105381	0.162828
ILMN_1658144	TRIP11	7.33393	7.36414	7.25552	7.70803	7.43786	7.53105	7.30426	7.45389	6.99799	7.28163	7.37832	7.48817	-0.0648389	0.393544	0.176275	0.150165	-0.130661	0.42384
ILMN_1658145	GRLF1	6.62536	6.62267	6.61091	6.65369	6.52281	6.65571	6.72958	6.58536	6.61913	6.60883	6.701	6.6173	-0.0227263	0.487426	-0.0316372	0.581991	0.00231833	0.966928
ILMN_1658152	MAP3K10	7.0456	7.01348	6.92848	6.96198	6.96198	7.11837	7.0341	7.04542	7.21193	6.94048	7.06642	6.96223	0.00614194	0.912112	0.0244002	0.72652	0.107441	0.19645
ILMN_1658155	LOC643813	6.58035	6.66415	6.61534	6.56125	6.64314	6.52222	6.60104	6.56925	6.64602	6.58649	6.67383	6.80004	-0.0668428	0.372223	-0.111252	0.19469	-0.0813497	0.2844
ILMN_1658158	ZNF501	6.63216	6.65093	6.62718	6.61399	6.59323	6.66	6.61705	6.58223	6.60439	6.59857	6.62584	6.56849	0.0391259	0.0963413	0.0247735	0.390625	0.00359302	0.862345
ILMN_1658160	FAM156A	8.55147	8.52928	8.4245	8.38099	8.42408	8.34123	8.44036	8.46676	8.50827	8.49782	8.39116	8.41307	0.0677321	0.254065	-0.051915	0.267877	0.0377776	0.377065
ILMN_1658163	NR4A3	6.58285	6.66118	6.65117	6.62462	6.59186	6.61141	6.70135	6.68602	6.63155	6.71078	6.55244	6.64169	-0.00323236	0.953437	-0.0256733	0.612549	0.038005	0.49348
ILMN_1658173	ZNF418	6.87956	6.79345	6.84757	6.8358	6.89668	6.85074	6.86533	6.78488	6.87762	6.91627	6.8932	6.87364	-0.0541769	0.124992	-0.0332994	0.205935	-0.05176	0.176596
ILMN_1658175	GGA1	6.53284	6.60179	6.73162	6.61558	6.69451	6.61276	6.73263	6.68847	6.64169	6.67207	6.59061	6.66794	-0.0214575	0.754311	-0.00258623	0.948571	0.0440583	0.302949
ILMN_1658176	ABCG1	7.32746	7.21014	7.19906	7.1549	7.14016	7.41439	7.25334	7.28139	7.27993	7.24415	7.17802	7.11162	0.0676244	0.294713	0.058557	0.578333	0.0936265	0.0759412
ILMN_1658182	MEX3C	8.86772	8.77116	8.76986	8.81128	8.65351	8.74036	8.70959	8.74576	8.47142	8.72796	8.72489	8.51161	0.148091	0.132656	0.0802276	0.398223	-0.0125615	0.916066
ILMN_1658187	KIAA1026	6.64974	6.67242	6.66118	6.63337	6.61264	6.7063	6.6465	6.55256	6.62096	6.88343	6.64206	6.63349	-0.0585457	0.515582	-0.0688905	0.471368	-0.112982	0.261965
ILMN_1658190	LOC169834	6.61681	6.54821	6.59584	6.51455	6.5615	6.54371	6.629	6.54666	6.49909	6.56404	6.57153	6.5841	0.0137252	0.551259	-0.0333035	0.0888676	-0.014975	0.716405
ILMN_1658200	LOC642730	6.72471	6.70492	6.74232	6.81515	6.67923	6.65345	6.7367	6.87773	6.79178	6.7477	6.89668	6.91333	-0.128588	0.0749887	-0.136625	0.133481	-0.0504997	0.49148
ILMN_1658206	C1orf102	6.62377	6.8611	6.60772	6.63772	6.69591	6.61141	6.62035	6.62499	6.66664	6.58961	6.76327	6.69567	0.014678	0.886177	-0.0345055	0.57353	-0.045524	0.4359
ILMN_1658207	MSLNL	6.64422	6.75917	6.69544	6.66023	6.61129	6.62401	6.70135	6.68847	6.64025	6.6901	6.67971	6.65237	0.0255513	0.506961	-0.0422142	0.0843792	0.00263053	0.909505
ILMN_1658210	C7orf60	6.59509	6.58047	6.58348	6.50684	6.54377	6.57468	6.50863	6.57064	6.60858	6.55436	6.50546	6.56163	0.0458654	0.0652888	0.00128189	0.963566	0.0221336	0.551169
ILMN_1658212	CCDC40	6.62243	6.54486	6.59136	6.5982	6.7412	6.64206	6.58147	6.7149	6.62864	6.73263	6.57745	6.65833	-0.0699216	0.235779	0.00434588	0.94716	-0.0144675	0.819698
ILMN_1658214	DRD2	6.62377	6.59708	6.61386	6.55167	6.55538	6.65189	6.5977	6.44892	6.52685	6.61607	6.5982	6.55704	0.0211338	0.331333	-0.00412054	0.91707	-0.0659473	0.228154
ILMN_1658221	POLH	7.25338	7.22504	7.14487	7.17662	7.09947	7.15536	7.17695	7.10335	7.12971	7.11275	7.07316	7.12083	0.105517	0.0416419	0.0415721	0.202696	0.0344251	0.257372
ILMN_1658231	NACC1	7.27638	7.16254	7.3666	7.08174	7.06696	7.09721	7.2719	7.34954	7.45191	7.21313	7.14917	7.30338	0.0466132	0.563293	-0.139923	0.0372847	0.135888	0.119031
ILMN_1658232	FBXL10	6.81941	6.84439	6.76249	6.84668	6.8308	6.81399	6.81819	6.87117	6.76591	6.72743	6.80585	6.77153	0.0404896	0.289648	0.0622155	0.0645823	0.0501547	0.256569
ILMN_1658235	LOC647135	6.71462	6.68205	6.74097	6.6465	6.80874	6.84156	6.71307	6.69671	6.60142	6.66888	6.80681	6.73805	-0.02537	0.589498	0.0276847	0.721112	-0.0675139	0.270866
ILMN_1658237	KHDRBS2	6.64422	6.6273	6.69671	6.64494	6.60722	6.72686	6.62328	6.5811	6.73535	6.61913	6.56659	6.63021	0.0507665	0.151289	0.0543672	0.249621	0.0412658	0.455859
ILMN_1658243	PSD3	6.65547	6.60956	6.68356	6.70722	6.69196	6.69753	6.69834	6.69671	6.59844	6.56226	6.70895	6.61411	0.0210925	0.683401	0.0704632	0.178023	0.0360576	0.542131
ILMN_1658247	OAS1	7.13211	7.11067	7.19971	7.42402	7.49651	7.48585	7.28806	7.16246	7.2914	7.05474	7.02125	7.03822	0.109422	0.0185139	0.430723	6.22623e-05	0.209234	0.00860005
ILMN_1658254	LOC643403	6.67112	6.65678	6.65976	6.66994	6.77142	6.75127	6.86176	6.70883	6.78237	6.75684	6.66071	6.71947	-0.0497843	0.153564	0.0185405	0.680117	0.0719837	0.240558
ILMN_1658257	ABCB5	6.55845	6.54654	6.58035	6.54435	6.52555	6.53011	6.51613	6.54808	6.54705	6.51232	6.45927	6.54409	0.0565509	0.10112	0.0281124	0.330173	0.0318606	0.301381
ILMN_1658259	DRG1	9.57975	9.43539	9.63004	9.28565	9.43936	9.45613	9.53079	9.50965	9.74114	9.36371	9.3905	9.33615	0.184941	0.0376057	0.0302592	0.620474	0.230408	0.038021
ILMN_1658261	MAPKBP1	6.91458	6.95631	6.98563	6.88119	6.85344	6.83789	6.9008	6.92793	6.91179	6.9108	6.98326	7.03529	-0.0242781	0.590569	-0.118942	0.0359056	-0.062943	0.163687
ILMN_1658265	GPR135	6.68064	6.70192	6.6852	6.65369	6.77603	6.67489	6.66118	6.58874	6.71639	6.59857	6.69938	6.61913	0.0502291	0.185226	0.062511	0.268507	0.0164108	0.750053
ILMN_1658266	LOC146053	7.90807	7.72948	7.72087	7.64905	7.68355	7.67294	7.94523	7.87574	7.72389	7.77076	7.71275	7.66363	0.0704315	0.361467	-0.0471971	0.221224	0.132573	0.140696
ILMN_1658271	LSS	6.72754	6.67665	6.72663	6.67136	6.67042	6.70503	6.68789	6.78923	6.59236	6.60735	6.67383	6.58911	0.0868468	0.0476126	0.0588369	0.104811	0.0663933	0.347279
ILMN_1658277	L3MBTL	6.6658	6.72749	6.84616	6.75695	6.83485	6.78007	6.70446	6.69949	6.77032	6.7595	6.73929	6.79826	-0.019202	0.747567	0.0249386	0.436272	-0.0409296	0.226219
ILMN_1658278	LOC653451	6.58611	6.60327	6.6483	6.50532	6.59186	6.57606	6.56125	6.59447	6.57291	6.57443	6.7421	6.62231	-0.0337174	0.560652	-0.0885318	0.192309	-0.070069	0.239928
ILMN_1658283	RPL17	13.4319	13.4813	13.4319	13.5882	13.5093	13.604	13.5987	13.4964	13.3663	13.4477	13.3621	13.4836	0.0172311	0.686031	0.136058	0.0427824	0.0560277	0.503524
ILMN_1658289	WDR54	11.3684	11.4601	11.5904	11.4065	11.3474	11.4087	11.4105	11.4841	11.5713	11.6274	11.4808	11.5621	-0.0837835	0.338297	-0.169205	0.0226232	-0.0681287	0.33978
ILMN_1658290	C16orf68	7.434	7.46869	7.58079	7.74477	7.55229	7.66088	7.73202	7.49564	7.73297	7.60354	7.5763	7.60589	-0.100753	0.0902013	0.0574035	0.367242	0.0582966	0.504139
ILMN_1658299	CCR2	6.73128	6.64783	6.61091	6.69591	6.69196	6.69625	6.65535	6.68731	6.63458	6.65809	6.65082	6.68969	-0.00286128	0.942915	0.0285065	0.0765275	-0.00712281	0.732494
ILMN_1658301	FAM83E	6.6029	6.57165	6.56099	6.60722	6.55256	6.60129	6.65535	6.61803	6.61005	6.58649	6.66947	6.57153	-0.0306482	0.405043	-0.0221358	0.561876	0.0186499	0.607504
ILMN_1658302	PIAS2	7.36181	7.30577	7.28124	7.19096	7.34186	7.29703	7.25166	7.20445	7.21378	7.42465	7.47668	7.37304	-0.108517	0.0470342	-0.148174	0.0512159	-0.201496	0.00373008
ILMN_1658304	LOC643669	6.63675	6.67242	6.7394	6.71925	6.68205	6.64061	6.83947	6.60735	6.66249	6.63796	6.58047	6.69567	0.0448225	0.374149	0.0426001	0.349791	0.065065	0.448479
ILMN_1658310	PCYT1A	6.7033	6.71473	6.75605	6.68626	6.74254	6.70503	6.68485	6.73726	6.68041	6.75305	6.84439	6.74097	-0.0547734	0.206482	-0.0681918	0.135897	-0.0786284	0.103396
ILMN_1658315	LOC728395	6.70607	6.68205	6.62864	6.71124	6.67042	6.63216	6.66746	6.69671	6.65345	6.71925	6.5982	6.57013	0.0430596	0.447307	0.0420791	0.456766	0.0433496	0.413007
ILMN_1658318	LOC120376	6.56734	6.58348	6.53543	6.55167	6.54074	6.56861	6.5629	6.70215	6.61153	6.60883	6.59659	6.62084	-0.0466668	0.0414958	-0.0550776	0.00678675	0.016776	0.706049
ILMN_1658327	BAZ1A	6.68205	6.71341	6.80284	6.88881	6.78575	6.87057	6.70745	6.81281	6.76899	6.70434	6.701	6.63675	0.0520695	0.286226	0.167679	0.0122419	0.0823888	0.0938685
ILMN_1658333	ECM1	6.65547	6.78923	6.78629	6.70146	6.70607	6.75905	6.67618	6.67665	6.70307	6.71925	6.71673	6.6173	0.0592362	0.345409	0.0377671	0.380145	0.000876494	0.981073
ILMN_1658337	AKIRIN1	7.39682	7.45331	7.36516	7.37042	7.42318	7.32769	7.28335	7.3716	7.40781	7.32847	7.37548	7.33296	0.0594603	0.116881	0.028125	0.421274	0.00861675	0.839511
ILMN_1658346	LOC653669	6.59993	6.58949	6.59757	6.65892	6.57316	6.62133	6.67912	6.61509	6.61766	6.67207	6.70895	6.65833	-0.0841199	0.00551212	-0.0619791	0.0998661	-0.0424921	0.175064
ILMN_1658351	FIS1	9.13411	9.29232	9.27625	9.29945	9.11782	9.00468	9.37313	9.39526	9.54258	9.43079	9.58571	9.53876	-0.284193	0.0139611	-0.377768	0.0178257	-0.0814305	0.310726
ILMN_1658356	PAMR1	6.5615	6.55116	6.61091	6.63929	6.48601	6.51153	6.63046	6.55998	6.46344	6.63651	6.56163	6.55064	-0.00840473	0.809716	-0.0373221	0.531477	-0.0316388	0.598613
ILMN_1658363	LOC339742	6.65988	6.70492	6.61681	6.49802	6.59186	6.60389	6.53777	6.49543	6.69457	6.61018	6.64061	6.65833	0.024159	0.452583	-0.0717849	0.119121	-0.0604526	0.386007
ILMN_1658369	TACR3	6.73263	6.64783	6.65976	6.69996	6.72243	6.67489	6.72799	6.70088	6.64169	6.70699	6.68392	6.7117	-0.0207974	0.496875	-0.001774	0.918041	-0.0106803	0.711486
ILMN_1658373	PAN2	8.10885	8.09375	7.968	7.97208	7.99758	7.97319	7.94772	7.82196	7.88503	7.84278	7.86016	7.83406	0.211202	0.0095761	0.135284	0.000280951	0.0392376	0.349929
ILMN_1658375	LOC642976	6.61214	6.53044	6.57443	6.58035	6.60439	6.53167	6.52229	6.55845	6.65809	6.61913	6.55845	6.61264	-0.0244008	0.467895	-0.0246048	0.440596	-0.0171303	0.722414
ILMN_1658376	CCDC114	6.84887	6.74798	6.80992	6.70722	6.72913	6.68858	6.77603	6.81708	6.74266	6.77021	6.73377	6.80413	0.0328847	0.409307	-0.0610577	0.0598324	0.00921898	0.77098
ILMN_1658381	PTCHD3	6.50849	6.60796	6.62718	6.61852	6.51993	6.46358	6.59348	6.53932	6.56849	6.70825	6.5331	6.64326	-0.0469918	0.497023	-0.0941912	0.239904	-0.061109	0.316789
ILMN_1658383	HSPA6	6.66994	6.75917	6.65833	6.67701	6.7412	6.5982	6.75584	6.79042	6.75828	6.64086	6.72095	6.66794	0.0192288	0.652641	-0.00444939	0.929983	0.091597	0.0244662
ILMN_1658384	CRTAC1	6.64422	6.59708	6.5366	6.60845	6.54988	6.54222	6.54513	6.59993	6.63312	6.59857	6.57594	6.62377	-0.00679577	0.851645	-0.0325748	0.263617	-0.00670091	0.829404
ILMN_1658386	DAOA	6.61043	6.55743	6.64674	6.61705	6.52124	6.61705	6.55972	6.7459	6.61766	6.6901	6.61987	6.55704	-0.0174715	0.725415	-0.0372192	0.497738	0.0187597	0.79367
ILMN_1658396	SPEF2	6.60895	6.54164	6.61091	6.72562	6.58335	6.66852	6.67513	6.63349	6.68731	6.65678	6.61705	6.56849	-0.0269412	0.475027	0.0450546	0.406227	0.051198	0.166207
ILMN_1658398	C3orf41	6.65547	6.64639	6.54769	6.61116	6.6347	6.46535	6.64049	6.6307	6.55959	6.5331	6.59223	6.58072	0.047831	0.286986	0.00171746	0.976992	0.0415771	0.254326
ILMN_1658399	KLRG1	7.0456	7.02107	7.01663	6.97262	6.98942	6.96111	7.07911	6.98221	6.98833	7.09545	6.97442	7.00511	0.0027731	0.94449	-0.0506094	0.245749	-0.00843967	0.868888
ILMN_1658405	LOC100101266	6.62828	6.67665	6.69405	6.64938	6.69312	6.73083	6.72516	6.54666	6.61153	6.59558	6.61116	6.72777	0.0214869	0.66551	0.0462714	0.388656	-0.0170535	0.811055
ILMN_1658407	SLC43A3	6.72095	6.74512	6.79345	6.61116	6.62096	6.62718	6.70135	6.66249	6.74266	6.63796	6.62584	6.57757	0.139384	0.00778725	0.00597677	0.769092	0.0883734	0.0405013
ILMN_1658411	CHD4	9.87035	9.78521	9.78176	9.82503	9.66008	9.75717	9.75404	9.70687	9.76045	9.68335	9.73747	9.77454	0.0806541	0.109083	0.0156431	0.789097	0.00866917	0.796211
ILMN_1658413	HYDIN	6.57393	6.56709	6.63421	6.5366	6.6347	6.69114	6.49082	6.57971	6.6071	6.51232	6.59373	6.60179	0.0224662	0.562837	0.0515351	0.389425	-0.0100661	0.834883
ILMN_1658415	LOC650185	6.60439	6.51613	6.53802	6.66023	6.59323	6.60685	6.6157	6.51192	6.67701	6.61478	6.54795	6.59223	-0.032141	0.385294	0.0351143	0.283107	0.0165555	0.766239
ILMN_1658416	MRPS18C	10.8398	10.832	10.7815	10.8885	10.8728	10.7712	11.0604	10.9573	11.005	10.8491	10.8972	10.8103	-0.0344119	0.330224	-0.0080276	0.865769	0.15538	0.0163483
ILMN_1658420	DSCAM	6.67665	6.67524	6.73805	6.66142	6.63892	6.73501	6.70745	6.64193	6.71776	6.72459	6.7063	6.69718	-0.0127074	0.597968	-0.0309064	0.362758	-0.0203091	0.4634
ILMN_1658422	LOC653242	6.72471	6.73962	6.69114	6.71788	6.81548	6.76899	6.58911	6.75361	6.85407	6.66888	6.68228	6.74713	0.0190592	0.534756	0.0680182	0.14088	0.0328311	0.705707
ILMN_1658425	DAG1	8.5866	8.5866	8.67457	8.54444	8.43283	8.44181	8.54572	8.49645	8.57457	8.45899	8.47121	8.48571	0.143955	0.00898763	0.0010585	0.978327	0.0669475	0.0498014
ILMN_1658426	WNT10A	6.7757	6.67923	6.66273	6.63033	6.63747	6.6613	6.67912	6.72311	6.74959	6.70434	6.65213	6.68637	0.0249392	0.55159	-0.037911	0.102254	0.0363268	0.229366
ILMN_1658427	FLJ20297	6.59509	6.54486	6.57884	6.52372	6.61129	6.54641	6.51021	6.55845	6.6071	6.62742	6.60117	6.49243	-0.000739381	0.987367	-0.0131986	0.800778	-0.015086	0.777466
ILMN_1658437	SFXN4	9.32074	9.36207	9.40532	9.41303	9.11677	9.33492	9.34426	9.07903	9.43383	9.25191	9.16205	9.14553	0.176212	0.0127646	0.101743	0.342738	0.0992119	0.423983
ILMN_1658439	C5orf44	7.12061	7.11162	7.10467	7.14025	7.3323	7.10362	7.12161	7.25101	7.07694	7.30426	7.40975	7.36435	-0.247152	0.00132445	-0.167398	0.0960318	-0.209601	0.0256847
ILMN_1658448	KRTAP2-1	6.85458	6.94623	6.84062	6.89904	7.08369	6.96908	7.01459	6.95186	6.9617	6.88739	6.8614	6.87487	0.00592232	0.87004	0.109383	0.114413	0.101494	0.00826782
ILMN_1658452	FAM53A	7.96858	7.88293	7.77711	8.02808	7.96071	7.8284	8.00881	7.72229	7.93368	7.85711	8.02943	7.87236	-0.0434292	0.607797	0.0194303	0.821039	-0.0313722	0.773614
ILMN_1658460	LOC653884	8.03459	8.16756	7.9766	8.04415	8.15981	8.14774	8.41066	8.33616	8.1871	8.32247	8.26707	8.34441	-0.25173	0.0145561	-0.19408	0.0109928	-8.5921e-06	0.999907
ILMN_1658464	GTF3A	10.8312	10.9554	11.0226	10.7969	11.0008	10.9584	10.9332	11.038	11.0942	11.0415	10.8143	10.8202	0.0444006	0.659464	0.0266871	0.79726	0.129787	0.216007
ILMN_1658467	LOC645408	6.5982	6.64639	6.65833	6.6029	6.62231	6.59385	6.5977	6.62231	6.6071	6.59111	6.69498	6.65547	-0.0128815	0.734454	-0.040833	0.263481	-0.0381503	0.287299
ILMN_1658468	LOC652840	6.65702	6.66118	6.76756	6.72846	6.64974	6.65345	6.72346	6.66474	6.5486	6.63651	6.57449	6.66177	0.0709952	0.185911	0.0529533	0.220134	0.0213373	0.729615
ILMN_1658469	TP53AP1	7.09391	7.24256	7.03063	7.0708	7.00277	7.04483	7.16154	7.22656	7.15726	7.1023	7.22432	7.13357	-0.0310294	0.691463	-0.113931	0.0520295	0.028389	0.54444
ILMN_1658472	APH1A	8.84441	8.93284	9.04382	8.88605	8.9064	8.86723	8.66419	8.92345	8.97514	8.77339	8.65887	8.72286	0.221983	0.0289232	0.168187	0.00862458	0.135889	0.252614
ILMN_1658477	C12orf64	6.6937	6.79616	6.63155	6.61852	6.61399	6.64902	6.69683	6.59447	6.53011	6.68193	6.62127	6.54074	0.092491	0.216287	0.0125328	0.78199	-0.00750898	0.91153
ILMN_1658480	C1QTNF9B	6.56734	6.71639	6.67665	6.63772	6.64842	6.78488	6.70584	6.53323	6.62096	6.68847	6.62127	6.75428	-0.0345419	0.588597	0.00233589	0.971279	-0.0679929	0.340586
ILMN_1658481	DGUOK	6.7757	6.78051	6.76249	6.79777	6.69949	6.75783	6.73128	6.76944	6.75361	6.67054	6.70227	6.6664	0.0931642	0.00175537	0.0719642	0.079042	0.071708	0.0106017
ILMN_1658483	IL1A	6.62961	6.55116	6.59422	6.60117	6.57468	6.59993	6.60401	6.67136	6.63578	6.59248	6.62267	6.59546	-0.011875	0.654966	-0.011613	0.419346	0.0335109	0.197303
ILMN_1658485	LOC644612	6.62961	6.60463	6.59136	6.52568	6.64314	6.59074	6.68064	6.50849	6.71925	6.63941	6.5446	6.65237	-0.00359276	0.924833	-0.0256083	0.622242	0.024	0.759293
ILMN_1658486	MRPL54	8.5569	8.82105	8.72775	8.77934	8.72726	8.65492	8.9026	8.92398	9.10588	8.92225	9.03584	9.00381	-0.2854	0.0277579	-0.266793	0.00570913	-0.00981339	0.899309
ILMN_1658491	LOC642578	6.58147	6.62584	6.55819	6.57291	6.67665	6.60129	6.73128	6.61067	6.66533	6.54255	6.61852	6.60808	-0.00121966	0.970472	0.0272352	0.523761	0.0793758	0.133152
ILMN_1658494	C13orf15	6.872	6.89214	6.97156	6.86151	6.85489	6.95283	6.90235	6.87926	6.98089	6.98117	6.88201	6.99705	-0.0415078	0.428021	-0.063667	0.254516	-0.0325741	0.529285
ILMN_1658495	LOC642895	6.55998	6.62267	6.57291	6.5982	6.62742	6.62255	6.58311	6.6489	6.62096	6.61766	6.68975	6.6569	-0.069583	0.0696092	-0.0387146	0.163475	-0.0371138	0.259094
ILMN_1658498	SLC44A3	6.82196	6.84161	6.8522	6.84062	6.84918	6.83064	6.86176	6.75227	6.82313	6.83359	6.87307	6.84897	-0.0132899	0.411523	-0.0117313	0.407219	-0.0394886	0.310769
ILMN_1658499	SYT13	6.67665	6.70492	6.6538	6.6273	6.65273	6.60537	6.60562	6.70469	6.61153	6.60142	6.671	6.6538	0.0363833	0.22862	-0.0136088	0.615159	-0.00146273	0.971369
ILMN_1658502	SCAND2	6.63965	6.69636	6.66568	6.70722	6.71135	6.68754	6.68205	6.63349	6.59695	6.63046	6.63917	6.62231	0.036588	0.099094	0.0713946	0.00126196	0.00685155	0.798563
ILMN_1658504	CHKA	8.15377	7.93886	8.03306	7.97285	7.86247	7.99386	7.96348	7.82722	7.96217	7.92338	7.88513	7.80096	0.172073	0.0750227	0.0732339	0.250043	0.0478004	0.455338
ILMN_1658513	IQSEC2	6.64566	6.7757	6.8645	6.74355	6.8308	6.87057	6.74512	6.86902	6.79324	6.85975	6.86243	6.8158	-0.0840401	0.267646	-0.0310198	0.485841	-0.043531	0.327998
ILMN_1658519	SLC13A3	6.70469	6.75071	6.74512	6.69155	6.67665	6.71181	6.80036	6.61803	6.74556	6.81995	6.72981	6.64794	0.000940201	0.986374	-0.0392258	0.482353	-0.011248	0.885596
ILMN_1658526	RYK	7.74694	7.8334	7.79216	7.87225	7.81789	7.6737	7.60915	7.54047	7.54996	7.74189	7.64786	7.65348	0.109757	0.0494417	0.106871	0.183862	-0.11455	0.0371561
ILMN_1658531	LOC653702	10.2633	10.2225	10.087	10.1174	10.164	10.2187	10.4888	10.4707	10.0988	10.5062	10.2953	10.5867	-0.271815	0.0559989	-0.296017	0.0320234	-0.109989	0.514458
ILMN_1658537	TXNDC2	6.59509	6.64783	6.65976	6.58924	6.57316	6.55691	6.55014	6.53479	6.68864	6.71227	6.47402	6.62084	0.0318495	0.681838	-0.0292708	0.69738	-0.0111874	0.901537
ILMN_1658548	LOC401180	6.63675	6.59708	6.62718	6.52725	6.65964	6.67337	6.55308	6.57064	6.66533	6.57001	6.53479	6.66947	0.0289126	0.529627	0.0286622	0.66601	0.00493043	0.930754
ILMN_1658556	LOC647536	6.68777	6.65535	6.6382	6.58035	6.57165	6.63216	6.60697	6.56741	6.53621	6.59558	6.62875	6.5841	0.0576269	0.0433966	-0.00809716	0.744155	-0.0326161	0.253295
ILMN_1658560	LOC653210	6.89557	6.95069	6.94067	6.94468	6.99484	7.05221	6.99178	6.99206	7.08991	7.05474	7.15427	7.21483	-0.212305	0.012889	-0.14404	0.0620198	-0.1167	0.109852
ILMN_1658563	LOC728760	6.62536	6.55743	6.65117	6.59223	6.60587	6.49749	6.53608	6.59198	6.7018	6.59248	6.58924	6.69242	-0.0133951	0.775567	-0.0595168	0.283175	-0.0147581	0.815714
ILMN_1658569	LOC728910	6.61534	6.63772	6.69938	6.67701	6.59323	6.68975	6.72346	6.54074	6.65345	6.65678	6.63167	6.69718	-0.0110666	0.743482	-0.00855086	0.822897	-0.0226636	0.709033
ILMN_1658571	LOC642280	6.69498	6.61815	6.62109	6.69428	6.51297	6.60389	6.68485	6.65261	6.64602	6.81835	6.69242	6.73648	-0.104345	0.0796109	-0.145369	0.0857144	-0.0879218	0.0860872
ILMN_1658575	GALNT5	6.6483	6.58811	6.62864	6.68626	6.54988	6.64482	6.68205	6.63627	6.67701	6.65678	6.62875	6.6173	-0.0125952	0.585224	-0.00729308	0.870685	0.0308293	0.173539
ILMN_1658576	PTPRN	6.66415	6.7033	6.60042	6.66142	6.59061	6.59534	6.65093	6.68064	6.64314	6.62608	6.57013	6.63844	0.0444073	0.291894	0.00423863	0.898011	0.0466853	0.122718
ILMN_1658579	CDK5RAP3	7.00977	6.97499	6.95302	6.9188	7.09655	7.02493	6.90661	6.9845	7.1733	7.11275	7.14627	7.17579	-0.165679	0.00252797	-0.131513	0.0741909	-0.123472	0.203192
ILMN_1658585	LOC644343	6.68508	6.70192	6.54615	6.45187	6.56303	6.62011	6.69114	6.57971	6.57733	6.60735	6.69787	6.671	-0.0143591	0.810889	-0.113739	0.11309	-0.0426811	0.407446
ILMN_1658586	LOC730012	6.79345	6.74937	6.671	6.70883	6.65964	6.73219	6.74512	6.75104	6.66829	6.71925	6.83106	6.67701	-0.00449715	0.942179	-0.0422188	0.451742	-0.020953	0.713422
ILMN_1658593	LOC643401	6.62961	6.59558	6.58674	6.62316	6.50664	6.55109	6.64794	6.49069	6.58924	6.65523	6.54305	6.54885	0.0216007	0.606834	-0.0220817	0.680536	-0.00642215	0.918017
ILMN_1658599	LOC647243	6.86717	6.93539	6.81217	6.75093	6.75678	6.73501	6.79292	6.86748	6.76899	6.80981	6.63627	6.83138	0.112425	0.189988	-0.0115783	0.861164	0.0506445	0.500782
ILMN_1658602	ASAH2B	6.83359	6.63167	6.565	6.63627	6.58197	6.69892	6.65535	6.6307	6.66391	6.59993	6.69938	6.67253	0.0194709	0.832051	-0.0182267	0.706098	-0.00729218	0.827363
ILMN_1658605	LOC647888	6.5615	6.82016	6.60932	6.58486	6.54654	6.64338	6.64494	6.60735	6.59236	6.52698	6.63021	6.54242	0.0971234	0.320484	0.0250531	0.589201	0.0483464	0.247666
ILMN_1658607	DLEU2	7.45941	7.78165	7.6015	7.96071	7.77699	7.79647	7.60199	7.99311	7.43637	7.79102	7.70758	7.70686	-0.120967	0.281824	0.109572	0.165178	-0.0579986	0.746451
ILMN_1658608	LOC642707	6.76999	6.74798	6.67524	6.67136	6.58624	6.68064	6.60993	6.7385	6.63578	6.6973	6.69938	6.78537	0.00372098	0.931655	-0.0812718	0.123544	-0.0659464	0.248128
ILMN_1658618	LOC647666	6.65988	6.52229	6.65117	6.57733	6.63747	6.54795	6.59061	6.60593	6.7018	6.60883	6.54615	6.53595	0.0474695	0.396003	0.0239405	0.52966	0.0691384	0.171765
ILMN_1658619	WWC1	7.65102	7.89198	7.77711	7.79939	7.75381	7.84107	7.78868	7.65606	8.17959	7.88589	7.82011	7.89484	-0.0935798	0.271712	-0.0688593	0.11664	0.00782874	0.963067
ILMN_1658621	LOC642833	6.58749	6.72323	6.66118	6.73985	6.60439	6.53167	6.50241	6.53932	6.66391	6.44974	6.61116	6.63021	0.0935938	0.248756	0.0615953	0.502388	0.00483841	0.951826
ILMN_1658623	MAGEC3	6.65988	6.671	6.61962	6.60439	6.60005	6.5331	6.59919	6.56741	6.62096	6.55155	6.59968	6.60956	0.0632373	0.056328	-0.00775015	0.803908	0.00892427	0.725911
ILMN_1658624	UBXN6	8.15434	8.25389	8.25515	8.13287	8.07431	8.13293	8.32232	8.2371	8.43995	8.21268	8.30163	8.32769	-0.0595411	0.284679	-0.167298	0.0137977	0.0524606	0.485507
ILMN_1658626	RREB1	6.541	6.57619	6.45187	6.60722	6.56569	6.69753	6.52529	6.64602	6.56849	6.48949	6.60969	6.54409	-0.0247363	0.651509	0.0757251	0.22027	0.0321773	0.551459
ILMN_1658628	C14orf72	6.64422	6.67242	6.58511	6.63337	6.64974	6.63506	6.6538	6.60463	6.5486	6.61913	6.62267	6.59385	0.0220323	0.464565	0.0275046	0.0582044	-0.00954142	0.778542
ILMN_1658631	LOC642321	6.8402	6.72164	6.77131	6.72698	6.81974	6.80047	6.77142	6.78803	6.72663	6.71925	6.78357	6.69996	0.0434562	0.366053	0.0481359	0.273075	0.0277704	0.42409
ILMN_1658632	NLRP7	6.63518	6.57896	6.60042	6.67959	6.55691	6.6671	6.62754	6.57064	6.68731	6.70561	6.49203	6.71639	-0.0331539	0.680791	-0.00347256	0.968559	-0.00951199	0.911577
ILMN_1658634	LOC649886	6.55372	6.70895	6.61534	6.53051	6.62742	6.51153	6.69683	6.54384	6.67701	6.66604	6.61558	6.63021	-0.0112791	0.824154	-0.080795	0.106339	0.00194536	0.971015
ILMN_1658635	CLGN	6.72471	6.69242	6.6538	6.58185	6.69451	6.69892	6.73388	6.65964	6.71925	6.65809	6.78357	6.72095	-0.0305628	0.503461	-0.0624444	0.301819	-0.0166173	0.717292
ILMN_1658636	MRE11A	6.71731	6.82493	6.76602	6.8358	6.92754	6.84031	6.81963	6.75684	6.86635	6.72584	6.80681	6.85458	-0.0263259	0.618076	0.0721333	0.207257	0.0185234	0.725548
ILMN_1658639	SLC46A3	7.24479	7.27499	7.32231	7.27886	7.33067	7.27437	7.16697	7.2413	7.20257	7.25177	7.23192	7.23296	0.0418096	0.149359	0.0557445	0.0438487	-0.0352733	0.190636
ILMN_1658647	LOC642778	6.6195	6.67665	6.72277	6.6563	6.66249	6.61705	6.60993	6.59198	6.71639	6.58035	6.60117	6.68637	0.0503476	0.317216	0.0226549	0.557177	0.0168061	0.756411
ILMN_1658649	C3orf57	6.60895	6.72164	6.65976	6.61558	6.57316	6.6256	6.73128	6.59447	6.57443	6.69451	6.70492	6.61264	-0.00724157	0.876531	-0.065907	0.119022	-0.037299	0.550419
ILMN_1658660	ACTC1	6.59173	6.73026	6.633	6.64338	6.60993	6.70146	6.60845	6.60593	6.59534	6.59993	6.67842	6.63191	0.0149124	0.766724	0.0148371	0.694492	-0.0335123	0.22108
ILMN_1658675	CDH23	6.62961	6.56557	6.62414	6.58035	6.6569	6.62401	6.66598	6.68205	6.68602	6.65523	6.52019	6.73805	-0.0313864	0.662544	-0.0174055	0.80855	0.0401909	0.562832
ILMN_1658677	DTX3	6.82589	6.70042	6.7133	6.81708	6.9064	6.88556	6.84824	6.95567	6.80456	6.85862	6.84439	6.88582	-0.116406	0.0491091	0.00673928	0.831015	0.00654894	0.894839
ILMN_1658678	SAAL1	9.22238	9.29918	9.28105	9.36167	9.20019	9.1755	9.01946	9.18124	9.09109	9.22613	9.12781	9.04962	0.133017	0.076655	0.111269	0.224713	-0.0372531	0.619241
ILMN_1658679	YJEFN3	6.7289	6.79345	6.74232	6.73648	6.78575	6.7133	6.80284	6.79616	6.73241	6.70951	6.64061	6.75004	0.0548347	0.217588	0.0451189	0.305467	0.0770779	0.119578
ILMN_1658684	ATP9B	6.64422	6.75071	6.85375	6.78384	6.68951	6.74064	6.72516	6.77942	6.74266	6.77373	6.78955	6.74097	-0.018525	0.78052	-0.0300866	0.383789	-0.019005	0.425748
ILMN_1658685	ELFN2	6.77417	6.58498	6.6382	6.68626	6.56443	6.69242	6.71776	6.6489	6.65964	6.59708	6.75133	6.77307	-0.0413736	0.628166	-0.0594556	0.439429	-0.0317237	0.621498
ILMN_1658687	LOC645893	6.55679	6.47894	6.50678	6.59534	6.64842	6.55691	6.62608	6.59993	6.61913	6.60142	6.59659	6.56329	-0.072929	0.0471572	0.013127	0.675392	0.0279522	0.122528
ILMN_1658689	LOC652736	6.74613	6.7332	6.75972	6.75338	6.79843	6.79475	6.84292	6.9016	6.73072	6.96583	6.91954	6.75004	-0.132118	0.116013	-0.0962815	0.224975	-0.053389	0.553045
ILMN_1658695	NUF2	8.22419	8.28539	7.99902	8.28844	8.45794	8.29986	8.10741	8.44592	7.77235	8.20999	8.38303	8.20979	-0.0980705	0.400967	0.0811432	0.365187	-0.159043	0.476801
ILMN_1658697	LOC730953	6.74097	6.67524	6.79885	6.76823	6.73884	6.7133	6.65678	6.67136	6.7018	6.69149	6.67689	6.73648	0.0367365	0.409907	0.0385037	0.183123	-0.024973	0.32553
ILMN_1658702	HIST1H2BJ	7.10492	7.20265	7.26781	7.26887	7.29075	7.09273	7.3503	7.25724	7.48384	7.37864	7.50493	7.45794	-0.255378	0.0130848	-0.229725	0.0341998	-0.0833803	0.330724
ILMN_1658706	ST6GALNAC2	6.76999	6.68064	6.79042	6.63033	6.81974	6.68754	6.71307	6.78336	6.73072	6.69996	6.77131	6.8263	-0.0188407	0.724088	-0.0533224	0.470415	-0.0234761	0.607892
ILMN_1658709	LAMB1	7.71623	7.9773	8.11363	8.12316	8.10333	8.05999	7.88758	8.03368	7.9454	8.06769	8.09398	8.06087	-0.138462	0.302247	0.0213153	0.371772	-0.118626	0.0531594
ILMN_1658710	FAM19A4	6.62377	6.71033	6.65117	6.62011	6.6087	6.57291	6.55819	6.59584	6.63155	6.6465	6.60241	6.63506	0.0337662	0.305418	-0.0274159	0.230643	-0.0327989	0.259162
ILMN_1658713	TNFSF11	6.58611	6.51927	6.55064	6.57165	6.58473	6.63506	6.65833	6.50678	6.52045	6.56049	6.60389	6.60179	-0.0367121	0.199706	0.00842759	0.742622	-0.0268685	0.622339
ILMN_1658715	NRXN3	6.57733	6.63167	6.6852	6.70411	6.60439	6.72799	6.68205	6.57971	6.62718	6.56404	6.62875	6.6632	0.0127345	0.779866	0.0601661	0.275958	0.0109802	0.804222
ILMN_1658717	DEPDC5	6.6483	6.872	6.79562	6.88232	6.80165	6.82568	6.83359	6.89194	6.72095	6.8613	6.8522	6.79021	-0.0625916	0.417779	0.00198269	0.954588	-0.0190738	0.745908
ILMN_1658719	LOC644952	6.58285	6.56049	6.62414	6.63033	6.59323	6.63216	6.5468	6.53932	6.58047	6.5714	6.58047	6.67853	-0.0209743	0.619584	0.00843924	0.82882	-0.0546059	0.20959
ILMN_1658728	ZBTB25	6.9235	6.88749	6.94067	6.93235	6.83695	6.77032	6.87804	6.84616	7.02623	6.81088	6.77701	6.82175	0.114006	0.0052681	0.0433255	0.425776	0.113593	0.117486
ILMN_1658740	PLGLA1	6.77131	6.7647	6.74803	6.79118	6.66616	6.70146	6.63482	6.6489	6.74959	6.66734	6.67383	6.72924	0.0712091	0.0268014	0.0294621	0.522393	-0.0123672	0.778649
ILMN_1658743	CCNDBP1	6.95798	6.89959	6.86208	6.86795	6.87021	6.87987	6.89662	6.93804	6.91343	6.86398	7.11101	6.9898	-0.0817137	0.34608	-0.115589	0.18083	-0.072234	0.374429
ILMN_1658746	PTPLAD1	6.9042	6.92473	6.86208	6.86151	6.81099	6.91378	6.93922	6.79475	6.76282	6.9686	6.98326	6.91617	-0.0590044	0.098248	-0.0939201	0.0594486	-0.123747	0.0996426
ILMN_1658748	LOC644714	6.60439	6.61116	6.46521	6.58035	6.59757	6.58223	6.59497	6.62645	6.64169	6.61607	6.59509	6.72095	-0.0837851	0.244508	-0.0573225	0.218531	-0.0230006	0.607183
ILMN_1658758	NPB	6.82069	6.671	6.78352	6.71788	6.67153	6.80295	6.74691	6.78608	6.83485	6.80456	6.70359	6.77307	-0.00200155	0.972201	-0.0296196	0.575796	0.0288737	0.502248
ILMN_1658759	PEX19	7.75168	7.84138	7.90723	7.765	7.82207	7.81719	7.77878	7.63414	7.84534	7.60312	7.80964	7.62158	0.155318	0.123857	0.123308	0.146049	0.074641	0.457114
ILMN_1658768	LOC402643	6.55679	6.62584	6.54923	6.62596	6.53932	6.65464	6.64193	6.52581	6.67853	6.64086	6.60241	6.69718	-0.0695322	0.13154	-0.0401775	0.415353	-0.0313886	0.589819
ILMN_1658770	LOC644411	6.60439	6.58348	6.57443	6.58335	6.66249	6.64614	6.67207	6.57544	6.63312	6.63349	6.60845	6.65093	-0.0435267	0.045656	-0.000297542	0.991762	-0.00407979	0.900559
ILMN_1658773	PIGF	6.95079	6.81771	6.92231	6.87671	6.84292	6.84465	6.82112	6.81281	6.94224	6.91746	6.88109	6.81899	0.0244233	0.648428	-0.0177539	0.594919	-0.0137911	0.79928
ILMN_1658798	MEGF9	6.62096	6.65833	6.62864	6.58924	6.58624	6.65726	6.58761	6.61214	6.57443	6.58649	6.64783	6.70146	-0.00928037	0.804618	-0.0343472	0.444254	-0.053862	0.198709
ILMN_1658800	BRPF3	8.73854	8.7187	8.71065	8.82827	8.75057	8.53726	8.59368	8.41307	8.75713	8.41967	8.50382	8.6015	0.214298	0.0157445	0.197035	0.124549	0.0796267	0.517767
ILMN_1658801	LOC651868	6.63216	6.49556	6.49356	6.59223	6.5615	6.63216	6.65237	6.59036	6.59086	6.57884	6.63627	6.51482	-0.0362161	0.56456	0.0186553	0.669781	0.0345524	0.443441
ILMN_1658802	KRTCAP2	10.1814	10.2913	10.0976	10.2953	10.1907	10.2155	10.4644	10.2867	10.4081	10.2514	10.372	10.2991	-0.117401	0.150662	-0.073696	0.193317	0.0788986	0.27926
ILMN_1658805	BRE	6.74501	6.63482	6.61239	6.6273	6.59323	6.70895	6.59497	6.57229	6.58047	6.77263	6.71947	6.7149	-0.0715942	0.186654	-0.0925123	0.0767181	-0.153094	0.00147238
ILMN_1658806	SLC5A10	6.86481	6.79064	6.73805	6.73128	6.8143	6.77482	6.82757	6.8142	6.90425	6.82207	6.80778	6.83768	-0.0246759	0.549196	-0.049042	0.12663	0.0261655	0.423121
ILMN_1658807	HMOX2	6.98895	7.20599	7.19309	7.2143	6.93838	7.26327	7.05221	7.24936	7.13121	7.08439	7.30266	7.14909	-0.0493727	0.632631	-0.0400652	0.755372	-0.0344587	0.710505
ILMN_1658809	SEZ6	6.69775	6.60796	6.69938	6.64206	6.61962	6.63506	6.64049	6.60735	6.6901	6.6538	6.73783	6.6003	0.00438771	0.934478	-0.0317301	0.477874	-0.0179988	0.719512
ILMN_1658818	CAMK2D	6.67665	6.69242	6.62414	6.68205	6.59186	6.7421	6.63046	6.59993	6.62389	6.59993	6.68543	6.68041	0.00914762	0.804254	0.0167429	0.762313	-0.0371637	0.27225
ILMN_1658821	SAMD1	7.37799	7.18454	7.46381	7.30136	7.239	7.19963	7.35708	7.43279	7.27739	7.22977	7.26327	7.29332	0.0799938	0.397947	-0.0154569	0.68026	0.0936298	0.125595
ILMN_1658825	LOC650180	6.61681	6.671	6.60932	6.50373	6.69068	6.62828	6.6495	6.63627	6.64602	6.53011	6.60389	6.60179	0.0537802	0.158582	0.0289676	0.654816	0.0653335	0.0564532
ILMN_1658830	C10orf26	7.11456	6.99451	7.16789	7.13901	7.21265	7.11625	7.05746	7.03822	7.2753	6.96697	7.23773	7.10161	-0.00978283	0.921687	0.0538661	0.553539	0.021556	0.852922
ILMN_1658834	ZC3H18	7.37923	7.52327	7.4588	7.51963	7.4224	7.37214	7.60694	7.55169	7.54296	7.45744	7.44646	7.50701	-0.0165402	0.735344	-0.0322469	0.531391	0.0968895	0.0239606
ILMN_1658835	CAV2	9.11425	9.10414	9.0424	9.11404	9.23021	9.23004	9.11128	9.21357	8.92436	9.20345	9.24558	9.18519	-0.124475	0.0122866	-0.0199774	0.663718	-0.128338	0.212212
ILMN_1658847	MGC61598	7.66555	7.5486	7.56496	7.51349	7.56431	7.48141	7.83173	7.73056	7.67346	7.69023	7.62005	7.70459	-0.0785919	0.155173	-0.151888	0.0129369	0.0736247	0.238132
ILMN_1658853	ARHGAP25	6.56874	6.671	6.671	6.6465	6.57316	6.65571	6.669	6.4334	6.62718	6.58811	6.59373	6.57443	0.0514927	0.210561	0.0397029	0.211742	-0.00889768	0.908619
ILMN_1658858	SP140L	6.76591	6.80842	6.81681	6.85939	6.85344	6.83789	6.68963	6.87773	6.73072	6.7477	6.84109	6.74232	0.0200122	0.605256	0.0732052	0.0887437	-0.0110099	0.874639
ILMN_1658861	FAM86B1	6.86357	6.83516	6.82069	6.86264	6.85344	6.94351	6.92655	7.023	6.8143	6.96342	6.99225	6.79826	-0.0781724	0.274117	-0.0314485	0.662611	0.00330603	0.970966
ILMN_1658864	SPTBN4	6.72221	6.64206	6.52921	6.74232	6.54525	6.59074	6.56443	6.54525	6.51888	6.61301	6.6055	6.6538	0.0070564	0.908967	0.00200118	0.975575	-0.0812479	0.0152889
ILMN_1658868	LOC401914	6.64566	6.75338	6.68975	6.69591	6.71021	6.73884	6.66273	6.7487	6.70307	6.91746	6.72686	6.76404	-0.106523	0.182785	-0.0878019	0.215207	-0.0979531	0.197223
ILMN_1658869	LOC645401	6.68064	6.61962	6.75839	6.71788	6.63179	6.59248	6.69248	6.68602	6.61005	6.54087	6.71673	6.53777	0.0877616	0.286899	0.0489261	0.521862	0.064396	0.376564
ILMN_1658874	UBE2Z	6.61815	6.64639	6.6483	6.63191	6.61264	6.52712	6.58311	6.71021	6.6071	6.56049	6.55244	6.65093	0.04966	0.207322	0.00260419	0.956724	0.0455189	0.415584
ILMN_1658883	ARAF	8.36066	8.31605	8.08831	8.33031	8.08114	8.14586	8.2371	7.63577	8.40421	8.18803	8.15036	8.25067	0.058654	0.547016	-0.0105789	0.901394	-0.103993	0.681189
ILMN_1658884	ATP11B	6.91458	6.87497	6.80144	6.89002	6.92955	6.85074	7.07338	6.86902	6.78095	6.8613	6.88597	6.9397	-0.0319906	0.47303	-0.00555092	0.872495	0.0121307	0.898907
ILMN_1658885	DAGLB	8.75578	8.83147	8.56635	8.63436	8.5976	8.65492	8.66576	8.30658	8.82451	8.43064	8.53692	8.41746	0.256195	0.0428241	0.167286	0.0155518	0.13728	0.433408
ILMN_1658899	DNCL2A	6.59341	6.66829	6.61386	6.60439	6.70883	6.5615	6.57468	6.5784	6.65666	6.66888	6.66522	6.61104	-0.0231896	0.470647	-0.0234711	0.647648	-0.0451319	0.238717
ILMN_1658902	DEAF1	7.35246	7.23137	7.34497	7.19796	7.34902	7.37538	7.65114	7.34452	7.42093	7.43831	7.46679	7.49135	-0.155881	0.0207336	-0.15803	0.0511062	0.00671711	0.946128
ILMN_1658904	ID2B	6.89184	6.92695	6.97452	6.86037	6.96011	7.00203	7.02659	6.96903	7.05366	6.83632	6.99078	6.95514	0.00368424	0.947404	0.0134213	0.841252	0.089011	0.168007
ILMN_1658905	LOC646976	6.70053	6.57757	6.67806	6.65369	6.53167	6.65345	6.59348	6.61214	6.6029	6.53011	6.65666	6.52685	0.0808475	0.229453	0.0417249	0.518265	0.0316313	0.503483
ILMN_1658909	OSGEPL1	6.9663	6.82016	6.95302	6.94846	7.03735	6.98937	6.90401	6.95069	6.89904	7.06155	6.95943	6.95794	-0.0798105	0.240176	-0.00124344	0.978237	-0.0750582	0.119695
ILMN_1658911	LOC647349	9.91484	10.0449	9.78074	10.0226	9.98203	10.1194	10.1144	10.1215	10.0793	10.2718	10.3331	10.2209	-0.361784	0.0120082	-0.23393	0.0109041	-0.170215	0.00823638
ILMN_1658917	SLC1A1	6.71204	6.69636	6.633	6.62316	6.72015	6.67912	6.74232	6.63627	6.63458	6.6206	6.70762	6.73805	-0.00828963	0.855488	-0.0146162	0.761815	-0.0177029	0.741586
ILMN_1658920	MCTP1	6.67818	6.64494	6.50836	6.63627	6.55538	6.64614	6.60845	6.66888	6.61913	6.63046	6.57153	6.58223	0.0157588	0.788822	0.0178608	0.627004	0.0374183	0.223282
ILMN_1658925	JAG2	6.70895	6.65976	6.67806	6.70146	6.6029	6.70757	6.56582	6.61214	6.73072	6.57594	6.65213	6.66794	0.050253	0.189429	0.0386396	0.431707	0.00422452	0.944207
ILMN_1658926	NOTCH3	6.86254	6.98507	6.92043	6.84062	6.83884	6.80295	6.93657	6.89194	6.86635	6.87497	6.8932	6.83269	0.0557218	0.232814	-0.0394879	0.143207	0.0313308	0.314223
ILMN_1658928	GNB2	8.16773	8.09208	8.23699	8.01133	7.96003	8.0702	8.20688	8.45125	8.16464	7.96781	8.11516	8.14717	0.0888881	0.268841	-0.0628552	0.379926	0.197545	0.133149
ILMN_1658937	LOC254312	6.64278	6.671	6.67806	6.68205	6.61546	6.69359	6.78314	6.64602	6.6756	6.64086	6.68975	6.7516	-0.0301204	0.423297	-0.0303716	0.492418	0.00751563	0.893204
ILMN_1658938	FAM90A12	6.62536	6.60796	6.54448	6.52568	6.57468	6.55109	6.55819	6.62791	6.6029	6.49948	6.64338	6.51652	0.03947	0.487113	-0.00264371	0.958325	0.0432059	0.434257
ILMN_1658940	DDX25	6.76999	6.71033	6.64386	6.67136	6.7341	6.69753	6.61288	6.65809	6.76138	6.63796	6.701	6.62084	0.0547903	0.279411	0.0477271	0.191674	0.0241855	0.655459
ILMN_1658942	LOC642121	6.44457	6.7385	6.6569	6.5982	6.62608	6.57291	6.51783	6.58699	6.66533	6.58498	6.54615	6.62706	0.0272605	0.778641	0.0130031	0.666049	0.00398917	0.938515
ILMN_1658945	LOC652367	6.68345	6.74367	6.66852	6.72198	6.64974	6.69753	6.67912	6.66474	6.75104	6.70262	6.66947	6.60808	0.0384885	0.34498	0.0296882	0.442685	0.0382421	0.376401
ILMN_1658950	LOC400890	8.14637	8.2574	8.18491	8.13568	8.18365	8.0473	8.22129	8.08381	8.51934	8.21143	8.2164	8.11046	0.0167948	0.741195	-0.0572226	0.339276	0.0953799	0.513223
ILMN_1658951	PPP2R4	6.6483	6.58047	6.58836	6.73766	6.57884	6.64338	6.59919	6.66249	6.65964	6.64806	6.80424	6.72289	-0.119352	0.0751175	-0.0717701	0.328202	-0.0846232	0.163168
ILMN_1658955	EIF4E	6.62377	6.67923	6.63572	6.52229	6.73884	6.60685	6.58911	6.62791	6.65046	6.75428	6.70895	6.65093	-0.0584758	0.163701	-0.0820587	0.304633	-0.082225	0.0777884
ILMN_1658957	LOC653635	6.76999	6.76049	6.84757	6.83122	6.87107	6.89406	6.89124	6.79972	6.87896	6.83233	6.78847	6.79183	-0.0115255	0.728651	0.0612427	0.0572068	0.0524295	0.176175
ILMN_1658962	LCP2	6.71204	6.78183	6.68356	6.6029	6.68695	6.68474	6.68205	6.64602	6.73535	6.80863	6.67242	6.70146	-0.00169392	0.974935	-0.0693069	0.236446	-0.0396982	0.462243
ILMN_1658964	LOC646863	6.63373	6.63772	6.70377	6.67701	6.63892	6.59534	6.64794	6.61509	6.71181	6.59558	6.67689	6.64025	0.020831	0.558582	-0.000484956	0.98908	0.0207081	0.604278
ILMN_1658965	GABBR1	6.74764	6.68672	6.6852	6.63337	6.73884	6.69625	6.59919	6.74982	6.69625	6.69277	6.76327	6.67389	-0.00345531	0.924159	-0.0204905	0.643209	-0.0282239	0.614788
ILMN_1658972	LOC344165	7.04967	6.67923	6.84757	6.61264	6.66249	6.78488	6.63892	6.70469	6.67112	6.80981	6.6594	6.73072	0.125515	0.338492	-0.0466407	0.525397	-0.0617337	0.26277
ILMN_1658978	LOC650155	6.93539	6.94837	6.8052	6.92483	6.95098	6.93662	6.98554	6.84057	7.0446	6.91373	6.90531	6.78858	0.0271156	0.679646	0.0682731	0.171919	0.087696	0.294962
ILMN_1658983	LOC642662	6.58147	6.58498	6.71616	6.57582	6.59061	6.54641	6.53005	6.6307	6.72924	6.67618	6.63917	6.60327	-0.0120008	0.818813	-0.0685955	0.0501602	-0.0095434	0.883701
ILMN_1658986	CREB5	6.73535	6.63167	6.61386	6.62145	6.66106	6.58949	6.57846	6.58223	6.62864	6.6465	6.62437	6.64938	0.0202071	0.629081	-0.0160855	0.508062	-0.0436448	0.0720253
ILMN_1658989	MEX3B	6.75695	6.74798	6.79042	6.83359	6.81254	6.85707	6.76138	6.7712	6.78488	6.70262	6.82334	6.71033	0.019688	0.656947	0.0889697	0.0962911	0.0270604	0.532023
ILMN_1658992	DPM1	9.27535	9.14643	9.07243	9.26002	9.38272	9.4494	9.36294	9.43725	9.32074	9.45691	9.53947	9.4401	-0.314091	0.00927934	-0.114777	0.144458	-0.105184	0.0835155
ILMN_1658995	ACOT9	8.95683	9.07216	9.12088	9.12261	9.18697	9.0132	9.29457	9.45485	9.32775	9.16903	9.33127	9.42966	-0.260025	0.0449153	-0.202387	0.091086	0.0490724	0.61581
ILMN_1659000	XPNPEP3	6.67253	6.69903	6.72004	6.78499	6.74367	6.70503	6.70135	6.65117	6.63458	6.52045	6.67842	6.62864	0.0880313	0.144388	0.135393	0.0599061	0.0531966	0.353817
ILMN_1659006	CBWD6	6.70895	6.81771	6.67806	6.77789	6.80295	6.66852	6.76138	6.71639	6.70745	6.71639	6.77131	6.68969	0.009111	0.860678	0.0239901	0.641819	0.00261078	0.933177
ILMN_1659010	LOC647783	6.57557	6.54981	6.57443	6.62145	6.57606	6.6256	6.6465	6.58536	6.62231	6.59111	6.57013	6.56329	-0.00824021	0.525374	0.0328623	0.140902	0.0432144	0.09273
ILMN_1659013	NANOG	6.57884	6.59409	6.48426	6.64794	6.76282	6.61583	6.63046	6.59993	6.56112	6.54409	6.62127	6.64794	-0.0520381	0.324511	0.0710964	0.261383	-0.0072654	0.85406
ILMN_1659017	C11orf74	8.21983	8.37758	8.08449	8.28044	8.31834	8.22736	8.33896	8.48713	8.1043	8.45525	8.46469	8.36394	-0.200659	0.0910891	-0.15258	0.0213875	-0.117833	0.367122
ILMN_1659023	LOC644707	6.63216	6.59098	6.57884	6.61264	6.61264	6.55845	6.61288	6.52725	6.59385	6.57594	6.58348	6.63349	0.00302297	0.906675	-0.00306239	0.910345	-0.0196439	0.568122
ILMN_1659024	TMCC2	6.59659	6.55116	6.55819	6.53802	6.57468	6.53906	6.6157	6.52229	6.50081	6.53777	6.5509	6.57443	0.0142797	0.465731	-0.0037765	0.826391	-0.00809704	0.836889
ILMN_1659026	POLR2K	7.62864	7.7564	7.48397	7.55624	7.46612	7.57084	7.77878	7.7765	7.60101	7.61816	7.68401	7.91968	-0.117618	0.385024	-0.209554	0.0973545	-0.0218533	0.850653
ILMN_1659027	SLC2A1	9.01611	8.89309	8.79942	8.80831	8.63956	8.74455	8.8613	8.51646	9.03439	8.52788	8.65065	8.6624	0.289232	0.0190713	0.117161	0.147474	0.190409	0.295078
ILMN_1659028	LOC649971	6.53128	6.68508	6.58674	6.52372	6.64842	6.6613	6.62754	6.57544	6.57733	6.61766	6.511	6.64938	0.00835404	0.898404	0.0184664	0.775893	0.000754919	0.987474
ILMN_1659029	FAM116B	6.9663	6.99846	6.93324	6.96049	6.97332	6.89042	7.05375	6.9639	6.9455	6.98312	7.13176	6.93294	-0.0499422	0.46963	-0.0745308	0.315574	-0.0282278	0.701093
ILMN_1659038	LOC642287	6.60895	6.74798	6.57291	6.62462	6.64193	6.65189	6.60562	6.61668	6.56112	6.66734	6.60969	6.57757	0.0250792	0.694972	0.0212831	0.481316	-0.0237279	0.490247
ILMN_1659047	HIST2H2AA3	7.76338	7.6444	7.61703	7.76201	7.87036	7.8136	7.84526	7.69688	8.07118	8.03985	7.82498	7.87749	-0.239167	0.0385051	-0.098783	0.24113	-0.042997	0.7512
ILMN_1659052	LOC645447	6.50678	6.58047	6.64086	6.66427	6.58911	6.51744	6.57316	6.58386	6.60858	6.63046	6.511	6.52685	0.0199308	0.730339	0.0341688	0.578408	0.0324293	0.451337
ILMN_1659054	CHKB	7.02623	6.97609	6.79454	6.96381	6.99837	6.97386	7.05628	6.92073	7.07151	6.97595	7.03557	7.04368	-0.0861147	0.30663	-0.0397222	0.168944	-0.00222598	0.968193
ILMN_1659058	PPP1R10	8.90305	8.93726	9.19199	8.91389	8.95529	8.80993	8.95885	8.91419	8.95282	8.70936	8.84084	8.80831	0.224592	0.0866266	0.106868	0.142214	0.155784	0.0205699
ILMN_1659063	OR51G1	6.60587	6.63167	6.6382	6.57165	6.52124	6.62828	6.51021	6.60142	6.57291	6.57884	6.53141	6.61913	0.0487848	0.14739	-0.00273921	0.948664	-0.0149475	0.706824
ILMN_1659072	SPP2	6.63675	6.61399	6.63009	6.73766	6.5615	6.59993	6.59621	6.62231	6.55359	6.52842	6.48775	6.60327	0.0871328	0.0649713	0.0932186	0.214717	0.0508894	0.265207
ILMN_1659075	HLA-DOA	6.66415	6.67806	6.60932	6.72698	6.72652	6.59683	6.58611	6.64314	6.66391	6.6538	6.59509	6.53777	0.0549574	0.236788	0.0878898	0.183699	0.0354996	0.433142
ILMN_1659077	CD40LG	6.65988	6.63167	6.53802	6.56709	6.56569	6.58223	6.66598	6.66249	6.57582	6.59111	6.71536	6.6003	-0.0257335	0.66057	-0.0639185	0.188111	-0.000828511	0.987492
ILMN_1659079	C5orf25	6.58448	6.66545	6.55512	6.62011	6.55845	6.57165	6.58022	6.65117	6.53011	6.55896	6.58486	6.61913	0.0140359	0.725868	-0.00424686	0.876266	-0.00048136	0.990792
ILMN_1659082	ZCRB1	7.65506	7.71933	7.52427	7.7288	7.71594	7.86094	7.74058	7.8284	7.45819	7.74017	7.72785	7.70995	-0.0931076	0.18403	0.0425684	0.417755	-0.0502688	0.676869
ILMN_1659085	WFDC12	6.60587	6.60327	6.4761	6.52725	6.65117	6.53906	6.54513	6.54666	6.58649	6.63191	6.56849	6.56696	-0.0273728	0.598103	-0.0166273	0.729997	-0.0296955	0.305997
ILMN_1659086	NEFL	6.77996	6.81521	6.78488	6.78499	6.76602	6.71673	6.81697	6.73038	6.75828	6.74232	6.84109	6.78368	0.00432103	0.894818	-0.0331145	0.399199	-0.0204872	0.621572
ILMN_1659095	LOC644029	13.7811	13.5616	13.6257	13.5207	13.5345	13.4758	13.6764	13.6293	13.6093	13.543	13.5586	13.5521	0.104886	0.183551	-0.0409027	0.089059	0.0871186	0.0128995
ILMN_1659099	ROCK2	7.53487	7.59443	7.47427	7.62967	7.62079	7.61279	7.32675	7.42715	7.24616	7.48461	7.52317	7.44474	0.0503466	0.291037	0.136907	0.00410054	-0.15082	0.0573301
ILMN_1659103	PSMA8	6.54885	6.45647	6.6453	6.47942	6.55116	6.57908	6.59919	6.54074	6.47645	6.51067	6.63021	6.62231	-0.0375263	0.604238	-0.0511773	0.352536	-0.0489396	0.403229
ILMN_1659106	PHLDA3	6.62828	6.59857	6.71467	6.541	6.65821	6.56595	6.64326	6.70745	6.54409	6.53472	6.57594	6.54885	0.0940018	0.0633092	0.0352173	0.40247	0.078431	0.18493
ILMN_1659110	MGC40489	7.0632	7.04209	7.14012	7.11992	7.0624	7.08916	6.94827	6.86748	7.03822	7.15364	6.97175	7.1382	-0.0060607	0.930626	0.00262808	0.967462	-0.136542	0.148043
ILMN_1659122	KLF10	6.68777	6.67665	6.6538	6.66427	6.669	6.7421	6.64326	6.67959	6.6388	6.53621	6.60845	6.64326	0.0767674	0.0810331	0.0958127	0.0764632	0.0579084	0.164406
ILMN_1659138	CACNA1F	6.56874	6.61116	6.63009	6.58185	6.56722	6.5982	6.53932	6.55704	6.53621	6.53932	6.58348	6.56494	0.0407533	0.140329	0.019844	0.272796	-0.0183871	0.269416
ILMN_1659142	MDK	6.6029	6.53362	6.6538	6.59223	6.57745	6.51153	6.62608	6.72562	6.57291	6.59111	6.63917	6.60476	-0.0149006	0.712464	-0.0512745	0.147826	0.0298623	0.55958
ILMN_1659148	ARL8A	6.72346	6.69079	6.75605	6.77252	6.69068	6.77384	6.82303	6.72039	6.7412	6.66189	6.77701	6.67253	0.0196211	0.659342	0.0418661	0.41316	0.0577223	0.297842
ILMN_1659150	HCN2	6.57222	6.62121	6.5714	6.63627	6.59061	6.57291	6.59061	6.64193	6.61448	6.63651	6.61705	6.50081	0.00348166	0.942621	0.0151374	0.760496	0.0308807	0.529274
ILMN_1659156	ANKRD16	7.43582	7.45007	7.29536	7.36014	7.37843	7.29703	7.49108	7.35426	7.55878	7.46928	7.37117	7.42993	-0.0297159	0.629705	-0.0782639	0.106444	0.0445796	0.53972
ILMN_1659158	SAMD3	7.32126	7.27747	7.13262	7.20779	7.19284	7.2328	7.05628	7.16246	7.06401	7.1743	7.24062	7.10362	0.0709393	0.364357	0.0383028	0.405542	-0.0785929	0.207157
ILMN_1659166	SLC6A15	6.79475	6.68064	6.74691	6.84668	6.76282	6.79843	6.57026	6.76944	6.74556	6.75828	6.71799	6.74232	0.00123618	0.97359	0.0631123	0.0794047	-0.0444425	0.524896
ILMN_1659169	LOC729919	6.61043	6.78673	6.69822	6.59968	6.59894	6.58511	6.68963	6.61926	6.58786	6.57443	6.67689	6.57153	0.0908446	0.214107	-0.0130384	0.728181	0.0246338	0.619866
ILMN_1659189	C9orf89	8.34969	8.39464	8.3257	8.37625	8.17211	8.2027	8.40077	8.61433	8.51487	8.4951	8.50735	8.51424	-0.148886	0.00207727	-0.255213	0.0161363	0.00442457	0.946491
ILMN_1659199	GRIN1	6.6195	6.57619	6.57733	6.59074	6.62742	6.56595	6.57165	6.61668	6.66664	6.57443	6.59061	6.63349	-0.00850308	0.726537	-0.00480639	0.857386	0.0188132	0.594842
ILMN_1659202	B3GALT1	6.6382	6.56557	6.53362	6.62145	6.64193	6.54371	6.64049	6.62912	6.53945	6.56709	6.67242	6.6157	-0.0392721	0.416712	-0.0160393	0.726135	-0.015384	0.744957
ILMN_1659206	RARA	7.84889	7.6274	7.91018	7.61216	7.57203	7.45385	7.62579	7.72898	7.63335	7.50622	7.41648	7.43946	0.341434	0.0192118	0.0919606	0.16746	0.208651	0.00815149
ILMN_1659207	LOC645225	6.71605	6.86687	6.72663	6.67701	6.87107	6.69625	6.78314	6.70215	6.74556	6.85489	6.78597	6.69996	-0.010425	0.882344	-0.0321635	0.69497	-0.0366567	0.508554
ILMN_1659209	LOC728012	6.63373	6.69079	6.68975	6.68205	6.77142	6.71548	6.62608	6.7385	6.67701	6.69451	6.83758	6.6538	-0.0572089	0.38589	-0.00564962	0.931251	-0.0481031	0.497309
ILMN_1659214	CTXN3	6.57393	6.59857	6.52202	6.62145	6.58911	6.55998	6.56443	6.60593	6.58223	6.60735	6.50081	6.59061	-0.00141838	0.973437	0.023923	0.558609	0.0179382	0.637096
ILMN_1659215	CYP4B1	6.67947	6.64061	6.6852	6.63772	6.61264	6.66	6.66273	6.73444	6.81291	6.63191	6.67689	6.79021	-0.0312395	0.559448	-0.0628848	0.269	0.0370255	0.594039
ILMN_1659224	DKFZP686C2281	6.61043	6.7332	6.61815	6.79021	6.64842	6.63929	6.69405	6.69405	6.67112	6.58649	6.62267	6.58699	0.0552122	0.253859	0.0939227	0.135274	0.0876892	0.00350209
ILMN_1659227	CD79A	6.61815	6.60796	6.68205	6.74467	6.67665	6.65571	6.629	6.59036	6.61153	6.70825	6.69938	6.75573	-0.0850655	0.0428576	-0.0287738	0.420022	-0.110822	0.00592755
ILMN_1659230	KRTHA5	6.54885	6.61399	6.53543	6.65761	6.56443	6.62011	6.56443	6.62377	6.59534	6.56226	6.55845	6.63675	-0.0197303	0.604933	0.0282293	0.490003	0.00869343	0.791193
ILMN_1659240	MTMR14	8.8247	8.95711	8.81453	8.86418	8.61184	8.79942	8.83285	8.53408	8.97634	8.83288	8.79186	8.84317	0.042811	0.42749	-0.0641558	0.453077	-0.0415464	0.767347
ILMN_1659253	LOC645468	6.62096	6.50935	6.55231	6.73766	6.58473	6.57757	6.56867	6.59447	6.56112	6.66604	6.53802	6.52529	-0.0155777	0.792758	0.056871	0.455461	-0.00169757	0.972369
ILMN_1659255	RP2	6.89446	6.84439	7.08156	6.96049	6.97947	6.93019	6.85396	6.87926	6.78357	6.95765	6.91319	6.88582	0.0212487	0.791394	0.0378294	0.210329	-0.0799554	0.0871994
ILMN_1659257	TNFRSF8	6.71055	6.70042	6.65833	6.69718	6.64602	6.68614	6.71021	6.72152	6.65666	6.69869	6.59968	6.67389	0.032346	0.392373	0.019029	0.601018	0.0387123	0.340904
ILMN_1659259	PRPF6	6.90541	6.98203	7.08068	7.01709	6.97518	6.98117	6.99045	7.023	7.01838	7.05573	6.97442	7.12573	-0.0625885	0.402912	-0.0608102	0.253545	-0.0413463	0.409116
ILMN_1659265	HIT-40	6.78521	6.62121	6.59584	6.62316	6.73783	6.61852	6.67759	6.77471	6.7367	6.73703	6.68392	6.66794	-0.0288796	0.670056	-0.036459	0.456333	0.033371	0.396019
ILMN_1659270	OTP	7.14778	7.08889	7.08722	7.00511	7.0126	6.97599	7.07525	6.9069	7.07151	7.11275	7.01718	6.91333	0.0935419	0.199521	-0.016521	0.792176	0.00346479	0.967521
ILMN_1659273	LOC441408	9.10211	9.09412	9.15249	9.08166	9.14262	9.08932	9.43572	9.41849	9.31593	9.33897	9.34774	9.37791	-0.238635	0.0003919	-0.250339	0.000371878	0.0351714	0.420378
ILMN_1659285	PSMG1	10.1127	10.0255	10.327	10.0632	10.1632	10.1165	10.1916	10.365	10.2721	10.1889	10.1771	10.173	-0.0246061	0.797404	-0.0653895	0.0892724	0.0965787	0.127449
ILMN_1659290	PLEKHB2	6.63373	6.63167	6.64086	6.67136	6.71913	6.60389	6.75584	6.66474	6.66829	6.58498	6.65356	6.65237	0.0051136	0.833769	0.0344871	0.441268	0.0659836	0.152727
ILMN_1659297	FZD6	8.3423	8.59383	8.24519	8.47936	8.58932	8.56205	8.06345	8.46992	7.9785	8.50224	8.29144	8.32658	0.0203535	0.876249	0.170153	0.0804774	-0.202797	0.286576
ILMN_1659306	SVIL	6.70607	6.77417	6.71467	6.74948	6.63337	6.78608	6.64494	6.72562	6.54255	6.70262	6.72232	6.74232	0.00921805	0.723539	0.000555065	0.991225	-0.0847153	0.193071
ILMN_1659312	PMP22	6.65702	6.62437	6.57733	6.63772	6.58911	6.59074	6.57165	6.6307	6.58047	6.61478	6.66379	6.60636	-0.00873982	0.779981	-0.0224573	0.401897	-0.0340405	0.255441
ILMN_1659316	HEPACAM	6.73535	6.57757	6.6671	6.69996	6.6569	6.58811	6.62608	6.63349	6.64025	6.56849	6.61411	6.63021	0.0557367	0.321268	0.0440545	0.304685	0.0290026	0.200297
ILMN_1659318	LOC399753	6.54551	6.59248	6.58674	6.59385	6.7341	6.67759	6.62035	6.70088	6.66118	6.61913	6.62875	6.74389	-0.0890164	0.105587	0.00458758	0.939877	-0.00311984	0.949546
ILMN_1659327	LOC283683	8.9559	8.80071	8.76365	8.79533	8.80605	8.75657	9.092	9.18762	9.01533	8.97598	9.2146	8.96384	-0.211385	0.103652	-0.265491	0.0329518	0.0468446	0.649941
ILMN_1659333	FLJ36144	6.68917	6.59248	6.64086	6.64206	6.76724	6.73083	6.74097	6.57064	6.6388	6.73263	6.57153	6.52215	0.0320649	0.668115	0.104605	0.228423	0.0413675	0.634629
ILMN_1659339	ELP4	7.28826	7.26147	7.24936	7.26747	7.26014	7.19677	7.2413	7.37246	7.14627	7.35224	7.31639	7.23376	-0.034434	0.403712	-0.0593345	0.227335	-0.0474493	0.558138
ILMN_1659343	BOLA2	11.8662	11.8193	11.7272	11.8357	11.8416	11.7628	11.8818	12.0026	12.189	12.0241	11.8939	11.8818	-0.129012	0.102556	-0.119866	0.0829857	0.0912186	0.414605
ILMN_1659346	PPARA	6.55998	6.66699	6.59136	6.55487	6.52281	6.5615	6.70883	6.53777	6.51442	6.60587	6.60697	6.59223	0.00441598	0.897264	-0.055294	0.0126219	-0.0146861	0.822907
ILMN_1659350	CASP6	6.83485	6.8583	6.88033	6.82525	6.8522	6.81248	6.86923	6.88526	6.9747	6.90536	7.05746	7.05474	-0.148026	0.0464001	-0.175877	0.027063	-0.0961208	0.184517
ILMN_1659352	KCNK13	6.64674	6.64938	6.565	6.60722	6.75439	6.70388	6.64794	6.7459	6.67407	6.70561	6.57013	6.69405	-0.0362218	0.52026	0.0319035	0.629635	0.0327087	0.565795
ILMN_1659354	GH2	6.541	6.65237	6.67923	6.62462	6.73659	6.63361	6.53005	6.65535	6.55512	6.58197	6.63167	6.60808	0.0169577	0.723607	0.0576995	0.210039	-0.0270685	0.544097
ILMN_1659359	SCUBE3	6.61534	6.60636	6.75472	6.65369	6.64458	6.63929	6.59919	6.57971	6.6973	6.6453	6.56481	6.67389	0.0308052	0.623897	0.0178508	0.616482	-0.00260167	0.960113
ILMN_1659364	RFC5	9.78212	9.83927	10.0215	9.98548	9.90488	9.71179	9.62924	9.64516	9.79219	9.70733	9.59388	9.67641	0.221759	0.0497461	0.208181	0.0771366	0.0296579	0.65708
ILMN_1659365	LOC653071	7.9533	7.92442	7.9298	7.82572	7.99434	8.03255	7.97017	8.20549	8.20054	8.25711	8.14015	8.14453	-0.244757	0.00338267	-0.229727	0.0363263	-0.055197	0.558331
ILMN_1659370	LOC391013	6.64422	6.56049	6.61534	6.73377	6.55538	6.54962	6.65535	6.58536	6.60587	6.58649	6.57153	6.56329	0.032914	0.265988	0.0391551	0.554808	0.0417595	0.128644
ILMN_1659371	ADRA2A	7.00118	6.8567	6.96697	6.87057	6.86908	6.91492	7.01773	6.95765	6.9455	6.74367	6.94243	6.88287	0.085298	0.309068	0.0285349	0.663192	0.117307	0.136012
ILMN_1659378	TFAP2D	6.7133	6.61399	6.68205	6.72198	6.58197	6.67489	6.68345	6.65809	6.63578	6.64398	6.56036	6.64938	0.0518717	0.275574	0.0417082	0.45295	0.0412021	0.266547
ILMN_1659389	LOC649632	6.57222	6.62267	6.62414	6.58035	6.59186	6.53751	6.60104	6.61509	6.61913	6.516	6.5281	6.47982	0.0983738	0.0117604	0.0619333	0.0480236	0.103785	0.00259084
ILMN_1659395	LOC136157	6.50081	6.56709	6.59757	6.63337	6.54525	6.65345	6.65678	6.7385	6.61595	6.58649	6.66071	6.61913	-0.0669494	0.134295	-0.0114194	0.787205	0.0483019	0.31362
ILMN_1659401	LOC653155	6.59659	6.63627	6.51021	6.63482	6.57165	6.50532	6.62608	6.65117	6.82313	6.59111	6.58348	6.64326	-0.0249261	0.582075	-0.0353525	0.445722	0.0941808	0.219262
ILMN_1659405	LOC653773	12.2714	12.3385	12.3411	12.319	12.3385	12.3904	12.5094	12.4903	12.3687	12.3738	12.5052	12.3411	-0.0897298	0.178677	-0.0574226	0.35129	0.0494492	0.499911
ILMN_1659411	POLR2C	8.87992	8.97053	9.02319	8.83572	8.71166	8.82223	8.79459	8.82451	8.97968	8.99459	9.01499	9.0012	-0.0457137	0.340308	-0.213725	0.0057827	-0.137337	0.0758957
ILMN_1659415	MAP2K1IP1	8.95398	8.69157	8.83804	9.00812	8.99495	8.92119	8.78951	9.09848	8.57493	9.06247	9.09462	8.9913	-0.221599	0.0536434	-0.0747115	0.140936	-0.228493	0.214427
ILMN_1659421	LOC642720	6.66285	6.54022	6.57443	6.51258	6.48217	6.62401	6.58311	6.57064	6.7242	6.60142	6.47901	6.51139	0.0618898	0.297576	0.00898283	0.881521	0.0953741	0.195088
ILMN_1659426	LOC646503	6.74097	6.75772	6.77406	6.6563	6.74725	6.67759	6.74097	6.69126	6.67701	6.66462	6.6594	6.79616	0.0508571	0.328602	-0.0130115	0.816454	-0.00364735	0.943966
ILMN_1659430	PDE4DIP	6.58147	6.66545	6.63155	6.55167	6.57026	6.63651	6.66438	6.65117	6.59086	6.67054	6.5982	6.671	-0.0204223	0.584187	-0.06043	0.162353	-0.011109	0.754212
ILMN_1659432	LOC644647	6.68345	6.61815	6.59757	6.58335	6.53323	6.57757	6.62754	6.66474	6.56278	6.59558	6.61705	6.58911	0.0324745	0.29893	-0.0358651	0.116284	0.0177683	0.596813
ILMN_1659437	TXNDC17	11.6683	11.6546	11.6274	11.6184	11.528	11.5547	11.756	11.7249	11.583	11.6132	11.7586	11.6301	-0.0172069	0.735419	-0.100246	0.132542	0.0206606	0.783503
ILMN_1659443	LOC652454	6.62377	6.65237	6.53207	6.60117	6.61264	6.61141	6.60697	6.67018	6.68462	6.7895	6.58624	6.57908	-0.0488714	0.564642	-0.0432033	0.565575	0.0023169	0.976195
ILMN_1659444	KIF1B	6.6483	6.70757	6.63421	6.6563	6.56303	6.73219	6.65237	6.64458	6.71353	6.6973	6.64938	6.71947	-0.0253574	0.453102	-0.0382088	0.511671	-0.018558	0.570298
ILMN_1659452	AAA1	6.7815	6.61962	6.66947	6.67136	6.73026	6.60993	6.66746	6.76078	6.6973	6.71502	6.76094	6.688	-0.0311223	0.584419	-0.0508018	0.280481	-0.0128058	0.731462
ILMN_1659462	DUSP23	8.91506	8.83762	8.93625	8.77748	8.75883	8.76117	9.06891	8.94712	9.37949	9.16142	9.06203	9.1594	-0.231306	0.00649049	-0.361793	0.000408274	0.00422568	0.976146
ILMN_1659463	APAF1	8.13764	7.9298	8.14333	7.69256	8.1669	7.98246	8.04306	7.86657	7.69688	7.669	8.00522	7.96335	0.191065	0.206869	0.068112	0.715308	-0.0103559	0.946686
ILMN_1659464	FAM71F1	6.64974	6.62875	6.70238	6.63482	6.69068	6.54641	6.65833	6.57544	6.53945	6.62608	6.61558	6.59223	0.0489909	0.111603	0.0126693	0.783783	-0.0202276	0.60984
ILMN_1659470	PBRM1	6.88607	6.90541	6.86717	6.91398	6.89088	6.85302	6.8263	6.72675	6.75684	6.87977	6.87087	6.84767	0.0201148	0.240534	0.0198592	0.380806	-0.0961403	0.0361513
ILMN_1659475	KRTAP4-5	6.57733	6.56049	6.58986	6.66142	6.61399	6.60845	6.54371	6.48184	6.63155	6.57443	6.62267	6.51652	0.00468296	0.890198	0.0567463	0.180147	-0.0188437	0.740979
ILMN_1659484	MAGEC3	6.69625	6.65535	6.67524	6.67959	6.56722	6.58811	6.68789	6.51613	6.64458	6.62341	6.66652	6.57908	0.0526127	0.132049	-0.0113621	0.803557	-0.00680375	0.911388
ILMN_1659488	PLXNB2	6.62243	6.57165	6.6483	6.70146	6.67923	6.7133	6.75127	6.69949	6.7255	6.6594	6.65511	6.69718	-0.0564391	0.0973639	0.0274331	0.175473	0.054857	0.0521319
ILMN_1659490	LOC653158	7.18784	7.22279	7.35912	7.26988	7.28005	7.24688	7.21386	7.2736	7.22647	7.18912	7.13879	7.34703	0.0316057	0.718372	0.0406215	0.557121	0.0129972	0.851965
ILMN_1659493	LOC642985	6.74937	6.57896	6.60191	6.6465	6.67413	6.72448	6.629	6.53024	6.64602	6.63506	6.57013	6.55231	0.0575779	0.384494	0.0958673	0.0476908	0.0159206	0.735716
ILMN_1659495	HBS1L	6.68649	6.60956	6.65535	6.63337	6.701	6.58811	6.669	6.6376	6.52359	6.61607	6.61411	6.69718	0.0080122	0.831709	-0.00162929	0.971403	-0.032392	0.566852
ILMN_1659497	LOC647711	6.65117	6.58649	6.64386	6.60722	6.60439	6.62401	6.62035	6.6206	6.64169	6.57733	6.52019	6.57443	0.0698565	0.0647977	0.0545584	0.0493793	0.0702335	0.0241729
ILMN_1659508	LOC148003	6.54255	6.55602	6.56659	6.62316	6.59894	6.51744	6.61705	6.57064	6.62389	6.51744	6.60241	6.65833	-0.0376725	0.415812	-0.0128793	0.816453	0.011139	0.813627
ILMN_1659511	LOC645652	6.67818	6.69509	6.65117	6.66427	6.65821	6.70895	6.64326	6.72675	6.64314	6.64806	6.5982	6.64482	0.0444574	0.0967306	0.0467829	0.10837	0.0406892	0.274643
ILMN_1659513	LOC643953	6.53284	6.61558	6.71467	6.61705	6.64458	6.61411	6.58761	6.55704	6.52685	6.59403	6.56036	6.49563	0.0710267	0.301833	0.0752427	0.068931	0.00716396	0.84243
ILMN_1659517	WDR89	6.61681	6.52229	6.75205	6.61705	6.669	6.71548	6.6465	6.68998	6.65511	6.63046	6.6273	6.64794	-0.00485201	0.94573	0.0319455	0.334571	0.028633	0.124415
ILMN_1659522	EPS8L1	6.65117	6.6435	6.71193	6.65761	6.6471	6.65345	6.58473	6.6489	6.60858	6.66462	6.61852	6.65547	0.0226625	0.429747	0.00651496	0.674778	-0.0321339	0.242205
ILMN_1659523	USP39	9.0317	8.95408	9.06566	9.07605	9.11632	9.09179	8.85183	8.87973	8.99419	8.76087	8.97053	8.93437	0.128557	0.151504	0.206133	0.0350278	0.0199965	0.810316
ILMN_1659524	C6orf66	8.26341	8.26555	8.23316	8.44116	8.57223	8.37459	8.6493	8.47863	8.33697	8.39978	8.66364	8.66828	-0.32319	0.0224154	-0.11457	0.340751	-0.0889322	0.521108
ILMN_1659536	FAM24B	7.24817	7.3543	7.35349	7.45238	7.42993	7.32402	7.37961	7.49852	7.70148	7.48759	7.48491	7.54792	-0.188154	0.00995051	-0.104698	0.0787515	0.0197312	0.847492
ILMN_1659537	MED8	7.26229	7.28354	7.22078	7.20481	7.22243	7.19072	7.2901	7.20567	7.22544	7.17296	7.24495	7.24829	0.0334723	0.337054	-0.0160781	0.572973	0.0183345	0.631906
ILMN_1659541	CRELD1	6.56449	6.59993	6.59273	6.63482	6.60142	6.65726	6.56867	6.59708	6.58348	6.66888	6.65511	6.56494	-0.0439276	0.270026	0.00152057	0.968689	-0.0465664	0.238169
ILMN_1659543	LOC283849	6.82821	6.81628	6.80992	6.8243	6.80047	6.83264	6.88535	6.872	6.95756	6.86398	6.89809	6.88805	-0.0652371	0.00469123	-0.0642351	0.0100581	0.0215987	0.489812
ILMN_1659544	STX3	7.46619	7.48973	7.55834	7.57045	7.5279	7.49737	7.58741	7.43327	7.47527	7.46612	7.54986	7.45379	0.0148259	0.735479	0.0419823	0.318494	0.00872777	0.881653
ILMN_1659550	LOC388654	13.548	13.4414	13.4595	13.3917	13.3966	13.3663	13.5345	13.337	13.4506	13.4203	13.5741	13.5455	-0.0302981	0.626593	-0.128397	0.056027	-0.0725608	0.383475
ILMN_1659553	ANAPC1	7.78076	7.73787	7.81198	7.78736	7.79292	7.7238	7.69846	7.65015	7.84892	7.58653	7.59541	7.64183	0.168945	0.00355258	0.160106	0.00464467	0.124588	0.115971
ILMN_1659563	MGC10646	6.55998	6.6435	6.60772	6.70561	6.55845	6.5982	6.52229	6.70607	6.60858	6.67337	6.59968	6.57757	-0.0131416	0.745202	0.00387687	0.944821	-0.0045627	0.943478
ILMN_1659564	SEC61A1	10.0474	10.1701	10.0786	9.93767	9.92454	10.0751	9.99183	9.89675	10.0598	10.0012	10.0529	10.0219	0.0733333	0.138798	-0.0462386	0.411234	-0.0425601	0.439334
ILMN_1659565	MFAP2	6.64674	6.52229	6.57884	6.63929	6.56303	6.65345	6.61141	6.5811	6.64314	6.59111	6.5446	6.70446	-0.0307674	0.632723	0.00520063	0.929411	-0.00150782	0.977716
ILMN_1659572	AR	6.56874	6.55269	6.56963	6.67136	6.64314	6.52372	6.52229	6.57064	6.56404	6.63046	6.5331	6.63844	-0.0369778	0.341752	0.0120732	0.841285	-0.0483407	0.26244
ILMN_1659576	FPGS	6.68064	6.73535	6.65535	6.63482	6.65117	6.65726	6.71307	6.72436	6.81291	6.69277	6.6594	6.62864	0.0301766	0.37144	-0.0125202	0.559497	0.0898477	0.0700688
ILMN_1659583	LOC644617	7.04469	6.96808	6.92043	6.98739	6.98056	6.94215	6.99714	6.87532	7.00506	6.92606	6.86882	6.92902	0.0697667	0.165305	0.0620662	0.0618244	0.0512108	0.331063
ILMN_1659594	SRGAP2	6.6483	6.65833	6.6453	6.58486	6.65428	6.64061	6.54513	6.62499	6.61301	6.6632	6.63337	6.60179	0.0178592	0.381127	-0.00620145	0.833598	-0.0384099	0.276918
ILMN_1659597	LOC649037	6.63118	6.67383	6.76756	6.73648	6.74853	6.65345	6.75299	6.72675	6.68864	6.64266	6.53479	6.63349	0.0872148	0.175547	0.109175	0.0751231	0.119151	0.0385931
ILMN_1659599	ADC	6.872	6.82757	6.80627	6.92902	6.89194	6.84396	6.85748	6.83474	6.95471	6.78171	6.93412	6.79021	-6.2869e-05	0.999112	0.0529599	0.391975	0.0469645	0.488509
ILMN_1659601	CCL26	6.65428	6.73162	6.69265	6.67701	6.69196	6.6658	6.74232	6.64602	6.7412	6.70561	6.70492	6.6632	0.00161019	0.954232	-0.0129834	0.461046	0.0186059	0.621796
ILMN_1659602	LOC401957	6.6029	6.58649	6.66273	6.62462	6.61264	6.49309	6.57846	6.54074	6.65809	6.54705	6.60969	6.62536	0.0233405	0.521996	-0.0172472	0.739198	-0.00160188	0.971442
ILMN_1659610	TJP3	6.64974	6.70192	6.7133	6.6273	6.65273	6.68975	6.74825	6.65678	6.70745	6.68695	6.66225	6.69405	0.00723595	0.756742	-0.0244927	0.298843	0.023079	0.458424
ILMN_1659620	MYCBP	6.83884	6.86228	6.90541	6.85939	6.74501	6.87057	6.89789	6.74982	6.68731	6.86264	6.82757	6.76591	0.050133	0.218112	0.00628084	0.904347	-0.0403739	0.587493
ILMN_1659623	LOC645870	6.60587	6.58649	6.61239	6.55167	6.52124	6.63929	6.63482	6.71353	6.6388	6.52045	6.61264	6.62864	0.0143384	0.699823	-0.0165074	0.752528	0.0751396	0.150542
ILMN_1659627	LOC647322	6.94841	6.89688	6.92131	6.9012	6.9097	6.88246	6.94827	6.96965	6.92902	6.87752	6.96073	6.95919	-0.0102787	0.758753	-0.0346945	0.292367	0.0164972	0.610316
ILMN_1659631	LOC730024	8.01433	8.14359	7.9766	7.99021	7.96368	7.88316	8.11548	7.87749	8.01007	8.16223	8.06503	8.06727	-0.05334	0.423208	-0.152498	0.028351	-0.0971669	0.269881
ILMN_1659639	LOC642120	6.67665	6.72164	6.72425	6.58486	6.64974	6.88363	6.79162	6.65404	6.93166	6.79183	6.59509	6.65547	0.026716	0.680165	0.0252748	0.82612	0.111642	0.322681
ILMN_1659645	PRG3	6.68205	6.58498	6.60042	6.56861	6.62499	6.53583	6.55819	6.52868	6.59695	6.62742	6.5181	6.50823	0.0712357	0.216866	0.0252278	0.614229	0.0100256	0.827108
ILMN_1659649	SGCG	6.62377	6.62584	6.71055	6.78499	6.64055	6.66994	6.66273	6.76171	6.55959	6.72459	6.64482	6.67701	-0.0287543	0.47823	0.0163521	0.759072	-0.0207957	0.757098
ILMN_1659659	MAGEH1	7.40047	7.56602	7.58973	7.49461	7.56128	7.46259	7.78868	7.54667	7.6148	7.52939	7.47454	7.58555	-0.01109	0.877661	-0.0236647	0.6135	0.120221	0.20205
ILMN_1659675	LOC653088	6.57733	6.62875	6.6483	6.57884	6.52281	6.57606	6.53167	6.55103	6.65189	6.58197	6.54615	6.63021	0.0320162	0.377257	-0.0268723	0.426962	-0.00791403	0.867555
ILMN_1659678	GABRA2	6.67383	6.51455	6.63009	6.6273	6.54988	6.57165	6.66438	6.55538	6.54551	6.54255	6.5446	6.59385	0.0458281	0.414493	0.0226097	0.472051	0.0280923	0.536636
ILMN_1659682	GALK2	7.35089	7.32664	7.20916	7.26988	7.24746	7.12036	7.36334	7.31673	7.4313	7.2827	7.32847	7.30121	-0.00856259	0.860608	-0.0915576	0.131589	0.0663293	0.137725
ILMN_1659688	LGALS3BP	6.65428	6.8522	6.85944	7.12706	7.239	7.18808	6.97733	6.93166	6.99206	6.78803	6.80424	6.83627	-0.0208766	0.776339	0.3752	0.000444902	0.157501	0.00239992
ILMN_1659692	LOC23117	6.57051	6.54821	6.58986	6.57582	6.62742	6.47955	6.57026	6.59323	6.57896	6.60142	6.68228	6.64482	-0.0733128	0.0493359	-0.0819113	0.171466	-0.062025	0.0631721
ILMN_1659693	LOC649429	6.53945	6.67806	6.6538	6.69155	6.61264	6.58949	6.54847	6.58699	6.6388	6.6453	6.54923	6.7117	-0.0116397	0.863787	-0.00418604	0.944378	-0.0439933	0.46048
ILMN_1659696	USP6NL	6.51862	6.60636	6.49643	6.55167	6.52855	6.54371	6.57468	6.61386	6.52685	6.59403	6.54923	6.57757	-0.0331416	0.409633	-0.0323021	0.0934906	-0.00181283	0.952095
ILMN_1659703	WWP2	7.36566	7.41092	7.21442	7.41568	7.33067	7.33326	7.33067	7.09304	7.26747	7.17823	7.25803	7.14029	0.13815	0.115059	0.167688	0.0196794	0.0382098	0.654212
ILMN_1659725	EXOSC5	8.63323	8.69555	8.8779	8.80698	8.69797	8.72507	8.92744	8.99051	9.03126	8.56445	8.75876	8.78599	0.0324937	0.764362	0.0402723	0.628875	0.280006	0.0211314
ILMN_1659727	CDAN1	8.53114	8.34091	8.44695	8.31982	8.23946	8.27806	8.33412	8.39385	8.51569	8.39424	8.31893	8.38006	0.0752584	0.275889	-0.0852957	0.0597518	0.0501424	0.437594
ILMN_1659737	LOC388780	6.72754	6.54486	6.69938	6.6465	6.65547	6.64614	6.59061	6.6206	6.64169	6.59857	6.64338	6.52045	0.0697948	0.357578	0.0619056	0.16104	0.0301686	0.480839
ILMN_1659744	PRMT1	6.60142	6.65833	6.72277	6.64206	6.59894	6.61276	6.63747	6.73315	6.60858	6.6453	6.72232	6.71788	-0.0343253	0.469774	-0.0772444	0.0509945	-0.0354329	0.47663
ILMN_1659749	DSP	6.67253	6.59558	6.61681	6.66852	6.70365	6.68754	6.68649	6.63203	6.61766	6.64398	6.68975	6.65547	-0.0347572	0.263634	0.0235037	0.241014	-0.0176711	0.519707
ILMN_1659752	LOC730996	6.94526	6.9069	6.94653	6.9845	7.19677	6.96111	7.09211	7.01233	6.88795	7.03675	7.10204	6.9914	-0.110501	0.0332232	0.00406272	0.962654	-0.0459364	0.533671
ILMN_1659753	LAMP2	7.72389	7.6658	7.86629	7.75673	7.90716	7.77725	7.74717	7.72502	7.78546	7.87523	7.95601	7.85633	-0.143864	0.0980851	-0.0821457	0.217286	-0.143308	0.015352
ILMN_1659761	SNX29	6.7033	6.82016	6.7332	6.75939	6.73286	6.77032	6.669	6.67524	6.7367	6.68041	6.71296	6.66	0.0677666	0.151491	0.0697346	0.0214401	0.00919165	0.74657
ILMN_1659762	BTF3	12.6531	12.3986	12.5404	12.4556	12.623	12.545	12.5162	12.5162	12.623	12.5917	12.5217	12.5517	-0.0242827	0.766389	-0.0137971	0.805462	-0.00317034	0.942027
ILMN_1659766	BAG3	9.65101	9.68445	9.59724	9.70239	9.48941	9.51608	9.77913	9.50965	9.76186	9.60839	9.67829	9.4782	0.0559359	0.430762	-0.0190033	0.841405	0.0952517	0.415575
ILMN_1659769	MRAP	6.65702	6.8263	6.63155	6.84564	6.68205	6.6613	6.69996	6.73162	6.77931	6.72192	6.70492	6.73805	-0.0166719	0.800872	0.00803226	0.898416	0.015335	0.572297
ILMN_1659770	KCNJ15	6.55372	6.69079	6.6671	6.59074	6.57606	6.63929	6.76999	6.66622	6.60439	6.63651	6.69938	6.70446	-0.0429116	0.418385	-0.078087	0.0546387	8.29385e-05	0.998827
ILMN_1659771	LOC645683	12.7277	12.7603	13.0043	12.5131	12.9441	12.7622	12.8119	12.8331	12.886	12.815	12.9639	12.815	-0.0338235	0.75309	-0.124829	0.405629	-0.0208954	0.720013
ILMN_1659772	CNGA2	6.57884	6.61116	6.62414	6.66285	6.54821	6.55256	6.50241	6.51021	6.59993	6.51888	6.60117	6.50241	0.0638952	0.128165	0.0470549	0.385762	-0.0033019	0.943434
ILMN_1659773	PCDHAC2	6.71462	6.69382	6.70895	6.6465	6.74725	6.61705	6.669	6.68731	6.68731	6.70825	6.77438	6.61104	0.00790122	0.876834	-0.0276236	0.677428	-0.0166893	0.744726
ILMN_1659777	RUFY1	7.25537	7.21945	7.27955	7.34286	7.21165	7.27046	7.25334	7.19752	7.15482	7.21394	7.21111	7.15146	0.0592884	0.0916383	0.0828187	0.126837	0.00972088	0.795272
ILMN_1659781	CSMD3	6.54731	6.54821	6.5366	6.57733	6.6347	6.5615	6.5331	6.60735	6.6756	6.51888	6.57291	6.61411	-0.0245972	0.426631	0.0225404	0.559138	0.0367124	0.499738
ILMN_1659782	STK19	7.77388	7.77569	7.66789	7.91748	7.71594	7.78972	7.92119	7.76072	7.83757	7.86206	7.7765	7.74747	-0.0561932	0.319927	0.0123721	0.864834	0.0444836	0.483823
ILMN_1659786	CCDC76	7.52201	7.46023	7.43838	7.70107	7.71594	7.6656	7.3068	7.68104	7.24113	7.44822	7.41351	7.47434	0.0281802	0.409478	0.248848	0.000420703	-0.0357017	0.808811
ILMN_1659792	HOXD9	6.80165	6.80842	6.76756	6.8243	6.8308	6.77263	6.8263	6.85883	6.89617	6.79702	6.72527	6.84616	0.00306154	0.938539	0.0197581	0.644261	0.0709475	0.154607
ILMN_1659800	BCL11A	6.60895	6.63167	6.7255	6.54583	6.58624	6.57606	6.56125	6.59584	6.541	6.66071	6.64639	6.57606	0.0276553	0.565734	-0.0583413	0.113062	-0.0616905	0.114585
ILMN_1659801	ATP6V1C1	7.91792	7.80747	7.8364	7.87958	7.99105	8.11165	7.60836	7.71275	7.50155	7.85529	7.8479	7.8976	-0.0130001	0.739791	0.127166	0.138143	-0.259376	0.0145728
ILMN_1659817	LOC643285	6.77701	6.65093	6.68672	6.73985	6.66106	6.68064	6.69248	6.71124	6.65809	6.68041	6.65356	6.60956	0.0570438	0.253649	0.0460052	0.217007	0.0394258	0.202001
ILMN_1659820	OLA1	6.80165	6.70895	6.85095	6.67842	6.76404	6.71673	6.82303	6.72675	6.72788	6.68438	6.77285	6.75428	0.0500119	0.370167	-0.0174403	0.658457	0.0220481	0.625399
ILMN_1659823	PCDH1	6.66994	6.52091	6.56659	6.51258	6.59894	6.67489	6.68789	6.58874	6.60142	6.63506	6.50241	6.57757	0.0141307	0.820907	0.0237908	0.714692	0.0543321	0.33361
ILMN_1659836	RAET1G	6.79616	6.97042	7.00268	6.85334	6.98649	6.91492	6.93657	6.87344	7.01441	6.88201	6.86037	7.00511	0.00725458	0.930721	0.00242139	0.969367	0.0256431	0.694774
[truncated: 45,326 more rows]

## Sheet: Table SII 
Table SII. Gene list of differentially expressed genes.
ID_REF	Gene	5A_ECD vs. Empty	5A_Full vs. Empty	5A_ICD vs. Empty
ILMN_1653466	HES4	ILMN_1653466	ILMN_1653466	ILMN_1653466
ILMN_1653797	C6orf62	ILMN_1653797
ILMN_1654639	HERC6	ILMN_1654639	ILMN_1654639
ILMN_1655469	TSPAN3			ILMN_1655469
ILMN_1655561	ARPC3	ILMN_1655561
ILMN_1656898	LOC653324	ILMN_1656898
ILMN_1659913	ISG20	ILMN_1659913	ILMN_1659913
ILMN_1659936	PPP1R15A	ILMN_1659936
ILMN_1664010	ELF1	ILMN_1664010
ILMN_1667068	ZC3HAV1	ILMN_1667068
ILMN_1667825	MLKL	ILMN_1667825
ILMN_1672661	SP110	ILMN_1672661	ILMN_1672661
ILMN_1673352	IFITM2	ILMN_1673352	ILMN_1673352
ILMN_1674063	OAS2	ILMN_1674063
ILMN_1674811	OASL	ILMN_1674811	ILMN_1674811	ILMN_1674811
ILMN_1676091	LOC388275			ILMN_1676091
ILMN_1677432	SRGAP1			ILMN_1677432
ILMN_1678054	TRIM21	ILMN_1678054
ILMN_1679838	WBP5			ILMN_1679838
ILMN_1683792	LAP3	ILMN_1683792
ILMN_1686920	CCDC58	ILMN_1686920		ILMN_1686920
ILMN_1687384	IFI6	ILMN_1687384	ILMN_1687384	ILMN_1687384
ILMN_1689525	PMAIP1	ILMN_1689525	ILMN_1689525
ILMN_1690105	STAT1	ILMN_1690105	ILMN_1690105	ILMN_1690105
ILMN_1690586	HNRPA1P4			ILMN_1690586
ILMN_1690921	STAT2	ILMN_1690921	ILMN_1690921
ILMN_1691364	STAT1	ILMN_1691364	ILMN_1691364	ILMN_1691364
ILMN_1691731	PARP14	ILMN_1691731
ILMN_1695719	EIF2C2			ILMN_1695719
ILMN_1696654	IFIT5	ILMN_1696654
ILMN_1700477	MRPL43			ILMN_1700477
ILMN_1701789	IFIT3	ILMN_1701789	ILMN_1701789	ILMN_1701789
ILMN_1703622	PPIB			ILMN_1703622
ILMN_1704024	TMEM160			ILMN_1704024
ILMN_1705241	TDRD7	ILMN_1705241
ILMN_1705464	MRPL41			ILMN_1705464
ILMN_1706502	EIF2AK2	ILMN_1706502		ILMN_1706502
ILMN_1707695	IFIT1	ILMN_1707695	ILMN_1707695	ILMN_1707695
ILMN_1708270	RHOXF2B	ILMN_1708270		ILMN_1708270
ILMN_1708375	IRF1	ILMN_1708375
ILMN_1708934	ADM	ILMN_1708934	ILMN_1708934
ILMN_1712766	ERGIC2			ILMN_1712766
ILMN_1716264	ANKRD1	ILMN_1716264	ILMN_1716264
ILMN_1718558	PARP12	ILMN_1718558	ILMN_1718558
ILMN_1723912	IFI44L	ILMN_1723912
ILMN_1724837	ZC3HAV1	ILMN_1724837
ILMN_1725427	B2M	ILMN_1725427
ILMN_1727271	WARS	ILMN_1727271
ILMN_1728224	OGFR	ILMN_1728224
ILMN_1729749	HERC5	ILMN_1729749	ILMN_1729749	ILMN_1729749
ILMN_1729973	ZC3HAV1	ILMN_1729973	ILMN_1729973
ILMN_1731224	PARP9	ILMN_1731224	ILMN_1731224
ILMN_1731418	SP110	ILMN_1731418	ILMN_1731418
ILMN_1734544	WTAP			ILMN_1734544
ILMN_1736700	ALDOA			ILMN_1736700
ILMN_1736939	UGCG	ILMN_1736939		ILMN_1736939
ILMN_1738704	TRIM26	ILMN_1738704
ILMN_1739222	ETV5			ILMN_1739222
ILMN_1739428	IFIT2	ILMN_1739428	ILMN_1739428	ILMN_1739428
ILMN_1740466	FAM46A	ILMN_1740466
ILMN_1742230	BAZ1A	ILMN_1742230
ILMN_1743065	PTPLAD1			ILMN_1743065
ILMN_1745148	ZNFX1	ILMN_1745148	ILMN_1745148
ILMN_1745242	PLSCR1	ILMN_1745242
ILMN_1745374	IFI35	ILMN_1745374	ILMN_1745374
ILMN_1745397	OAS3	ILMN_1745397	ILMN_1745397
ILMN_1745471	IRF9	ILMN_1745471	ILMN_1745471	ILMN_1745471
ILMN_1745807	TMEM62	ILMN_1745807
ILMN_1750400	C19orf66	ILMN_1750400
ILMN_1751079	TAP1	ILMN_1751079	ILMN_1751079
ILMN_1751330	RBCK1	ILMN_1751330
ILMN_1751345	AP1S1	ILMN_1751345
ILMN_1751886	REC8	ILMN_1751886	ILMN_1751886
ILMN_1758731	CYP2J2	ILMN_1758731
ILMN_1760062	IFI44	ILMN_1760062	ILMN_1760062	ILMN_1760062
ILMN_1762899	EGR1	ILMN_1762899	ILMN_1762899
ILMN_1764090	AK3L1			ILMN_1764090
ILMN_1765258	HLA-E	ILMN_1765258
ILMN_1765459	S100A13	ILMN_1765459
ILMN_1767662	LASS6	ILMN_1767662		ILMN_1767662
ILMN_1768534	BHLHB2	ILMN_1768534
ILMN_1769520	UBE2L6	ILMN_1769520	ILMN_1769520
ILMN_1770892	YY1			ILMN_1770892
ILMN_1776181	BIRC3	ILMN_1776181
ILMN_1776723	PHF11	ILMN_1776723
ILMN_1776777	ADAR	ILMN_1776777
ILMN_1777325	STAT1	ILMN_1777325	ILMN_1777325	ILMN_1777325
ILMN_1777565	TAP2	ILMN_1777565
ILMN_1778617	TAF9			ILMN_1778617
ILMN_1779264	PSMG1			ILMN_1779264
ILMN_1781373	IFIH1	ILMN_1781373	ILMN_1781373	ILMN_1781373
ILMN_1787509	PRIC285	ILMN_1787509	ILMN_1787509	ILMN_1787509
ILMN_1795181	DDX60	ILMN_1795181
ILMN_1796949	TPX2			ILMN_1796949
ILMN_1797001	DDX58	ILMN_1797001
ILMN_1798181	IRF7	ILMN_1798181	ILMN_1798181
ILMN_1799467	SAMD9L	ILMN_1799467
ILMN_1801246	IFITM1	ILMN_1801246	ILMN_1801246
ILMN_1805750	IFITM3	ILMN_1805750	ILMN_1805750
ILMN_1809439	HMGB1L1	ILMN_1809439		ILMN_1809439
ILMN_1810608	PNPT1	ILMN_1810608
ILMN_1813314	HIST1H2BK	ILMN_1813314		ILMN_1813314
ILMN_1813625	TRIM25	ILMN_1813625
ILMN_1814305	SAMD9	ILMN_1814305	ILMN_1814305
ILMN_1845037		ILMN_1845037
ILMN_1855278		ILMN_1855278		ILMN_1855278
ILMN_2047511	CENTA1	ILMN_2047511
ILMN_2049766	NFE2L3	ILMN_2049766
ILMN_2053527	PARP9	ILMN_2053527
ILMN_2054019	ISG15	ILMN_2054019	ILMN_2054019	ILMN_2054019
ILMN_2058782	IFI27	ILMN_2058782
ILMN_2075334	HIST1H4C	ILMN_2075334		ILMN_2075334
ILMN_2098126	CCL5	ILMN_2098126
ILMN_2098446	PMAIP1	ILMN_2098446	ILMN_2098446	ILMN_2098446
ILMN_2105919	FGF2	ILMN_2105919
ILMN_2123402	TMEM4			ILMN_2123402
ILMN_2125675	LOC728643		ILMN_2125675
ILMN_2137789	KLF4	ILMN_2137789
ILMN_2139100	SHISA5	ILMN_2139100
ILMN_2148785	GBP1	ILMN_2148785
ILMN_2170814	LAMP3	ILMN_2170814
ILMN_2184262	OAS3	ILMN_2184262
ILMN_2188264	CYR61	ILMN_2188264
ILMN_2191759	LOC440396			ILMN_2191759
ILMN_2211950	SRP14P1			ILMN_2211950
ILMN_2220283	HNRPA1L-2			ILMN_2220283
ILMN_2223130	SMARCA5	ILMN_2223130
ILMN_2239754	IFIT3	ILMN_2239754	ILMN_2239754	ILMN_2239754
ILMN_2248970	OAS2	ILMN_2248970
ILMN_2262044	PARP10	ILMN_2262044
ILMN_2284591	OPA3			ILMN_2284591
ILMN_2318568	HCFC1R1	ILMN_2318568
ILMN_2320964	ADAR	ILMN_2320964
ILMN_2330861	SMC4	ILMN_2330861
ILMN_2337655	WARS	ILMN_2337655
ILMN_2343332	TAF9			ILMN_2343332
ILMN_2347798	IFI6	ILMN_2347798	ILMN_2347798	ILMN_2347798
ILMN_2349061	IRF7	ILMN_2349061	ILMN_2349061
ILMN_2374865	ATF3	ILMN_2374865
ILMN_2387742	HNRNPA1L2			ILMN_2387742
ILMN_2389582	HNRNPL	ILMN_2389582	ILMN_2389582	ILMN_2389582
ILMN_2390162	PHF11	ILMN_2390162
ILMN_2395389	PSMC4			ILMN_2395389
ILMN_2402936	LOC440926	ILMN_2402936
ILMN_2415144	SP110	ILMN_2415144	ILMN_2415144
ILMN_2415748	WSB1			ILMN_2415748
ILMN_3201663	LOC645231	ILMN_3201663
ILMN_3203868	LOC649873	ILMN_3203868
ILMN_3211302	LOC646909	ILMN_3211302
ILMN_3226012	LOC728698			ILMN_3226012
ILMN_3227811	LOC729423			ILMN_3227811
ILMN_3240420	USP18	ILMN_3240420	ILMN_3240420
ILMN_3243291	LOC100133372			ILMN_3243291
ILMN_3243593	LOC100008588			ILMN_3243593
ILMN_3246953	FTSJD2	ILMN_3246953
ILMN_3251545	CHMP5	ILMN_3251545
ILMN_3251662	HINT3	ILMN_3251662
ILMN_3278070	LOC100131336	ILMN_3278070
ILMN_3280565	LOC389342	ILMN_3280565		ILMN_3280565
ILMN_3288717	LOC392437			ILMN_3288717
ILMN_3289650	LOC402112			ILMN_3289650
ILMN_3292224	LOC100131609			ILMN_3292224
ILMN_3297996	LOC728732			ILMN_3297996
ILMN_3304022	LOC729102			ILMN_3304022
ILMN_3308961	MIR1974	ILMN_3308961
‘Gene list’ contains the differentially expressed genes in the 5A-ECD, 5A-Full and 5A-ICD groups. ID_REF, Illumina probe ID; 5A-Full, SEMA5A full length; 5A-ECD, SEMA5A extracellular domain; 5A-ICD, SEMA5A intracellular domain.

## Sheet: Table SIII
Table SIII. Expression values of genes in interferon signaling pathway.
ID_REF	Gene	log2FC (5A_Full vs. EMPTY)	P-value (5A_Full vs. EMPTY)	log2FC (5A_ECD vs. EMPTY)	P-value (5A_ECD vs. EMPTY)	log2FC (5A_ICD vs. EMPTY)	P-value (5A_ICD vs. EMPTY)
ILMN_1793384	JAK1	-0.189724	0.00755251	-0.158167	0.0861391	-0.088689	0.541923
ILMN_1683178	JAK2	0.0213745	0.472853	0.134077	0.00870714	0.115838	0.019957
ILMN_1676955	TYK2	-0.128549	0.48047	-0.0431183	0.404834	-0.294562	0.00345707
ILMN_1690105	STAT1	1.1832	1.05615e-05	2.52315	5.47872e-06	0.716578	2.36656e-05
ILMN_1690921	STAT2	0.769598	0.000107694	1.694	1.53316e-06	0.286804	0.000189263
ILMN_1745471	IRF9	1.73783	1.45372e-05	2.37519	1.85029e-05	1.00897	0.000270475
ILMN_1699331	IFIT1	0.282414	0.0159552	0.532409	7.60918e-05	0.140705	0.025605
ILMN_1707695	IFIT1	3.3896	2.44265e-05	4.70601	1.10557e-07	2.93077	5.82077e-07
ILMN_2054019	G1P2 (ISG15)	2.85752	3.46504e-06	3.68842	5.74897e-06	2.00072	2.39481e-05
ILMN_2347798	G1P3 (IFI6)	1.73995	0.00101652	3.07708	1.02445e-06	0.945632	5.46904e-06
ILMN_1687384	G1P3 (IFI6)	2.03375	6.46869e-05	3.52761	3.57291e-06	1.32184	0.000397231
ILMN_1801246	IFITM1	0.792251	1.27669e-05	1.39613	2.32536e-05	0.321863	0.00121676
ILMN_1673352	IFITM2	0.586045	0.00399672	0.828474	0.000393529	0.0725013	0.507876
ILMN_1805750	IFITM3	0.820952	0.0113812	0.992013	0.00513867	0.0142303	0.946475
‘Interferon signaling pathway’ contains the log2 fold changes and P-value of genes in the interferon signaling pathway. ID_REF, Illumina probe ID; FC, fold change; 5A-Full, SEMA5A full length; 5A-ECD, SEMA5A extracellular domain; 5A-ICD, SEMA5A intracellular domain.
